# Supplementary material
Source: publisher figshare collection journal article supplement (https://gsajournals.figshare.com/ndownloader/files/17415824)
Supplement: Supplementary file 1 [file 17415824]

## Sheet: Supplementary Dataset 1
Supplementary Dataset 1 MethylC-seq statistics
Summary statistics for MethylC-seq samples generated for this study.
Library Name	Sample Name	Germplasm	Condition	Tissue	Age	Platform	Read layout	Uniquely aligned	Filtered duplicates	Mean depth	mCG Chr1-5	mCHG Chr1-5	mCHH Chr1-5	mCHH Chloroplast
Exp532_Col_0_1_r1_S3_R1_001.fastq.gz	Col-0 rep 1	Col-0	N	True leaves #4-9	3 weeks	HiSeq 2500	100 bp single-end	22078668	4160545	15.4451	0.238317	0.0627626	0.0190222	0.00448482
Exp532_Col_0_1_r2_S4_R1_001.fastq.gz	Col-0 rep 2	Col-0	N	True leaves #4-9	3 weeks	HiSeq 2500	100 bp single-end	17590710	3131144	12.4209	0.241418	0.0655653	0.0206134	0.00592117
Exp532_Col_0_1_r3_S5_R1_001.fastq.gz	Col-0 rep 3	Col-0	N	True leaves #4-9	3 weeks	HiSeq 2500	100 bp single-end	27597260	5128919	19.3415	0.233677	0.0599973	0.0186569	0.00516934
Exp532_strs2_1_r1_S7_R1_001.fastq.gz	strs2 rep 1	strs2	N	True leaves #4-9	3 weeks	HiSeq 2500	100 bp single-end	20375577	3475943	14.5654	0.236098	0.0620393	0.0178775	0.00444055
Exp532_strs2_1_r2_S8_R1_001.fastq.gz	strs2 rep 2	strs2	N	True leaves #4-9	3 weeks	HiSeq 2500	100 bp single-end	21259064	3332924	15.4437	0.245272	0.0666439	0.020998	0.00498686
Exp532_strs2_1_r3_S6_R1_001.fastq.gz	strs2 rep 3	strs2	N	True leaves #4-9	3 weeks	HiSeq 2500	100 bp single-end	18854542	3435502	13.2836	0.243811	0.0649783	0.0192288	0.00495137

## Sheet: Supplementary Dataset 2
Supplementary Dataset 2
Differentially methylated regions identified between Col-0 and strs2 using DSS (delta: CG > 0.5, CHG > 0.2, CHH > 0.1).
Chromosome	Start	End	Length (bp)	Number of cytosines	Mean methylation estimates		Difference (WT - strs2)	Test statistic	Feature	Distance (bp)	Context	Direction
					WT	strs2
Chr1	201349	201437	89	10	0.783768	0.0363306	0.747437	193.314	AT1G01550	0	CG	Hypo-methylation
Chr1	282061	282146	86	12	0.0115903	0.711969	-0.700379	-222.08	AT1G01770	0	CG	Hyper-methylation
Chr1	407776	407843	68	8	0.80025	0.120442	0.679808	95.6791	AT1G02145	0	CG	Hypo-methylation
Chr1	528189	528244	56	12	0.0222475	0.648852	-0.626605	-162.798	AT1G02520	0	CG	Hyper-methylation
Chr1	544211	544275	65	10	0.757265	0.0287185	0.728547	185.503	AT1TE01760	0	CG	Hypo-methylation
Chr1	587403	587460	58	8	0.738332	0.0393269	0.699005	131.533	AT1TE01905	0	CG	Hypo-methylation
Chr1	647924	648009	86	4	0.853816	0.0627754	0.791041	71.1869	AT1G02890	0	CG	Hypo-methylation
Chr1	750180	750230	51	4	0.147088	0.80891	-0.661822	-45.1722	AT1G03110	0	CG	Hyper-methylation
Chr1	797313	797367	55	6	0.027983	0.847794	-0.819811	-107.682	AT1G03260	0	CG	Hyper-methylation
Chr1	947132	947191	60	4	0.021227	0.787065	-0.765838	-60.219	AT1G03770	0	CG	Hyper-methylation
Chr1	1056094	1056171	78	4	0.933722	0.0114602	0.922262	110.302	AT1G04080	0	CG	Hypo-methylation
Chr1	1065599	1065654	56	6	0.824589	0.0170253	0.807564	105.175	AT1G04120	0	CG	Hypo-methylation
Chr1	1228153	1228286	134	4	0.0105137	0.854844	-0.84433	-79.4264	AT1G04510	0	CG	Hyper-methylation
Chr1	1396609	1396747	139	10	0.696069	0.0160728	0.679997	143.742	AT1G04930	0	CG	Hypo-methylation
Chr1	1514152	1514218	67	8	0.0104261	0.677007	-0.666581	-98.5405	AT1G04353	0	CG	Hyper-methylation
Chr1	2017560	2017613	54	4	0.880136	0.0589894	0.821146	65.2622	AT1G06590	0	CG	Hypo-methylation
Chr1	2137029	2137079	51	4	0.0213317	0.812568	-0.791237	-66.9927	AT1G06960	0	CG	Hyper-methylation
Chr1	2720517	2720580	64	6	0.0105848	0.705438	-0.694853	-69.815	AT1G08590	0	CG	Hyper-methylation
Chr1	2757665	2757728	64	8	0.726369	0.0125318	0.713837	138.484	AT1G08660	0	CG	Hypo-methylation
Chr1	2925114	2925191	78	10	0.015325	0.72448	-0.709155	-138.945	AT1G09060	0	CG	Hyper-methylation
Chr1	3683525	3683734	210	30	0.0587249	0.747941	-0.689216	-588.749	AT1G11050	0	CG	Hyper-methylation
Chr1	3984488	3984658	171	12	0.82314	0.0829744	0.740166	192.886	AT1G11790	0	CG	Hypo-methylation
Chr1	4603628	4603759	132	10	0.021812	0.757468	-0.735656	-156.408	AT1G13410	0	CG	Hyper-methylation
Chr1	4737533	4737589	57	6	0.742565	0.0600736	0.682491	78.468	AT1G13820	0	CG	Hypo-methylation
Chr1	5010420	5010494	75	4	0.0113345	0.923862	-0.912528	-107.128	AT1G14610	0	CG	Hyper-methylation
Chr1	5107940	5107991	52	5	0.0832786	0.777047	-0.693768	-55.0516	AT1G14830	0	CG	Hyper-methylation
Chr1	5354936	5355055	120	18	0.0187126	0.80057	-0.781857	-491.689	AT1G05167	683	CG	Hyper-methylation
Chr1	5394959	5395131	173	10	0.0369741	0.684095	-0.647121	-126.718	AT1G15680	321	CG	Hyper-methylation
Chr1	5477473	5477529	57	6	0.017731	0.737	-0.719269	-80.7368	AT1G15940	0	CG	Hyper-methylation
Chr1	5729175	5729269	95	10	0.102582	0.757798	-0.655216	-133.719	AT1G16750	0	CG	Hyper-methylation
Chr1	5866669	5866724	56	6	0.702658	0.0298547	0.672803	83.5734	AT1G17150	0	CG	Hypo-methylation
Chr1	6212078	6212143	66	14	0.826465	0.0194084	0.807056	358.732	AT1G18060	0	CG	Hypo-methylation
Chr1	6594045	6594159	115	12	0.0178164	0.777249	-0.759433	-218.848	AT1TE21370	0	CG	Hyper-methylation
Chr1	6721498	6721565	68	10	0.85428	0.135745	0.718534	183.138	AT1TE21735	740	CG	Hypo-methylation
Chr1	6778091	6778178	88	14	0.814419	0.0277346	0.786684	335.851	AT1TE21910	393	CG	Hypo-methylation
Chr1	6952562	6952677	116	4	0.894064	0.0191312	0.874933	89.6744	AT1G20060	0	CG	Hypo-methylation
Chr1	7001919	7002047	129	4	0.847256	0.0377078	0.809548	66.9543	AT1G20200	0	CG	Hypo-methylation
Chr1	7247192	7247243	52	10	0.0198496	0.622382	-0.602532	-129.605	AT1G20840	0	CG	Hyper-methylation
Chr1	7315999	7316053	55	4	0.930041	0.0788659	0.851175	76.628	AT1G20970	0	CG	Hypo-methylation
Chr1	7475304	7475358	55	6	0.77961	0.0218763	0.757734	99.7985	AT1TE24060	0	CG	Hypo-methylation
Chr1	7486205	7486268	64	5	0.764229	0.013586	0.750643	78.5335	AT1G21380	0	CG	Hypo-methylation
Chr1	7879065	7879125	61	6	0.00863452	0.713033	-0.704399	-69.7906	AT1G22300	0	CG	Hyper-methylation
Chr1	7959685	7959828	144	11	0.024117	0.802394	-0.778277	-206.232	AT1TE25610	0	CG	Hyper-methylation
Chr1	8737998	8738104	107	10	0.0485441	0.824182	-0.775638	-202.131	AT1G24650	684	CG	Hyper-methylation
Chr1	8838428	8838535	108	4	0.769615	0.0866513	0.682963	44.8934	AT1G25220	0	CG	Hypo-methylation
Chr1	9385996	9386339	344	16	0.018121	0.718226	-0.700105	-239.908	AT1TE30250	0	CG	Hyper-methylation
Chr1	9573098	9573238	141	10	0.0140173	0.809137	-0.795119	-230.955	AT1TE30840	0	CG	Hyper-methylation
Chr1	10443890	10443945	56	5	0.0344149	0.684273	-0.649858	-65.5516	AT1G29830	0	CG	Hyper-methylation
Chr1	10734473	10734544	72	6	0.142561	0.791468	-0.648907	-55.2364	AT1G30400	0	CG	Hyper-methylation
Chr1	11155214	11155268	55	8	0.755944	0.0349578	0.720986	135.595	AT1TE36060	0	CG	Hypo-methylation
Chr1	11279501	11279565	65	8	0.0485065	0.797691	-0.749184	-149.931	AT1G31520	0	CG	Hyper-methylation
Chr1	11314591	11314668	78	8	0.844001	0.125049	0.718953	111.447	AT1G31600	0	CG	Hypo-methylation
Chr1	11631917	11631967	51	6	0.804798	0.11665	0.688148	79.9682	AT1TE37645	0	CG	Hypo-methylation
Chr1	11757627	11757681	55	10	0.700157	0.0247792	0.675378	161.18	AT1G32510	0	CG	Hypo-methylation
Chr1	12325159	12325407	249	6	0.0321684	0.753105	-0.720937	-81.7913	AT1G33930	0	CG	Hyper-methylation
Chr1	12347320	12347384	65	8	0.0540484	0.772782	-0.718733	-134.989	AT1G33960	0	CG	Hyper-methylation
Chr1	12560377	12560470	94	10	0.0150802	0.657363	-0.642282	-133.348	AT1G34392	0	CG	Hyper-methylation
Chr1	12738978	12739081	104	14	0.084866	0.831232	-0.746366	-285.736	AT1TE41525	0	CG	Hyper-methylation
Chr1	12843375	12843473	99	7	0.0153259	0.718061	-0.702735	-87.6532	AT1TE41800	0	CG	Hyper-methylation
Chr1	13090886	13090946	61	8	0.187345	0.827173	-0.639828	-91.3563	AT1G35530	0	CG	Hyper-methylation
Chr1	13130456	13130531	76	8	0.0140653	0.713231	-0.699166	-129.031	AT1TE42885	-689	CG	Hyper-methylation
Chr1	13359087	13359155	69	4	0.0326017	0.782162	-0.74956	-55.6214	AT1TE43705	1438	CG	Hyper-methylation
Chr1	13477662	13477755	94	8	0.85899	0.0370233	0.821967	166.24	AT1TE44100	-91	CG	Hypo-methylation
Chr1	13542008	13542069	62	6	0.854909	0.0301142	0.824795	107.651	AT1G36160	0	CG	Hypo-methylation
Chr1	13590462	13590612	151	8	0.703761	0.0438841	0.659877	109.234	AT1TE44505	1156	CG	Hypo-methylation
Chr1	13604291	13604869	579	24	0.0211027	0.824811	-0.803708	-538.21	AT1TE44565	-1148	CG	Hyper-methylation
Chr1	13699281	13699627	347	26	0.73691	0.0212925	0.715617	430.805	AT1TE44850	0	CG	Hypo-methylation
Chr1	13964925	13964978	54	8	0.652757	0.0153262	0.637431	113.233	AT1TE45835	98	CG	Hypo-methylation
Chr1	13980449	13980549	101	6	0.848778	0.160479	0.688299	68.9932	AT1TE45895	0	CG	Hypo-methylation
Chr1	14075628	14075725	98	10	0.0668697	0.756969	-0.690099	-157.899	AT1TE46245	0	CG	Hyper-methylation
Chr1	14155309	14155395	87	10	0.0194656	0.825082	-0.805617	-227.815	AT1G07013	0	CG	Hyper-methylation
Chr1	16148705	16148760	56	6	0.837583	0.0754933	0.762089	93.9092	AT1TE53205	0	CG	Hypo-methylation
Chr1	16403934	16404111	178	6	0.757163	0.0980158	0.659148	59.5715	AT1TE54045	0	CG	Hypo-methylation
Chr1	16491991	16492115	125	8	0.016605	0.690134	-0.673529	-106.039	AT1TE54400	-254	CG	Hyper-methylation
Chr1	16492530	16492683	154	4	0.0150613	0.758329	-0.743268	-55.5711	AT1TE54405	-252	CG	Hyper-methylation
Chr1	16659606	16659679	74	6	0.77522	0.0802695	0.69495	78.1881	AT1TE54920	0	CG	Hypo-methylation
Chr1	16830732	16830800	69	8	0.064888	0.755345	-0.690457	-128.629	AT1TE55690	-101	CG	Hyper-methylation
Chr1	16939472	16939522	51	8	0.888812	0.1584	0.730412	136.753	AT1TE56120	26	CG	Hypo-methylation
Chr1	17158558	17158725	168	16	0.844499	0.0176276	0.826871	490.97	AT1G45229	0	CG	Hypo-methylation
Chr1	17166729	17166848	120	6	0.781236	0.043634	0.737602	77.2437	AT1G45249	0	CG	Hypo-methylation
Chr1	17276117	17276192	76	9	0.179706	0.786432	-0.606726	-106.535	AT1G47056	0	CG	Hyper-methylation
Chr1	17442545	17442654	110	8	0.0165161	0.687161	-0.670645	-113.929	AT1TE57805	-432	CG	Hyper-methylation
Chr1	17513559	17513766	208	4	0.71707	0.0317215	0.685349	46.9469	AT1TE58050	0	CG	Hypo-methylation
Chr1	17557578	17557706	129	4	0.0141626	0.753911	-0.739749	-47.8611	AT1G47710	0	CG	Hyper-methylation
Chr1	17560876	17560989	114	6	0.734926	0.0325838	0.702343	78.2634	AT1G47720	298	CG	Hypo-methylation
Chr1	17590806	17590909	104	6	0.0165442	0.844813	-0.828269	-116.945	AT1G47770	0	CG	Hyper-methylation
Chr1	17667659	17667818	160	6	0.842612	0.166782	0.67583	73.5155	AT1G47940	-468	CG	Hypo-methylation
Chr1	17691303	17691393	91	10	0.0155965	0.756595	-0.740998	-169.706	AT1TE58750	-94	CG	Hyper-methylation
Chr1	17695788	17695854	67	6	0.0138645	0.816324	-0.80246	-104.91	AT1G07457	0	CG	Hyper-methylation
Chr1	17819600	17819794	195	12	0.813661	0.0413519	0.772309	198.895	AT1TE59150	0	CG	Hypo-methylation
Chr1	17887201	17887301	101	8	0.723841	0.027099	0.696742	87.1242	AT1G48410	0	CG	Hypo-methylation
Chr1	18115055	18115129	75	4	0.0105373	0.820253	-0.809716	-62.8924	AT1G48970	0	CG	Hyper-methylation
Chr1	18443881	18443935	55	8	0.754434	0.0131082	0.741326	131.49	AT1G49820	0	CG	Hypo-methylation
Chr1	18552620	18552732	113	6	0.760643	0.0412909	0.719353	79.6139	AT1G50060	0	CG	Hypo-methylation
Chr1	18648972	18649073	102	8	0.900376	0.12945	0.770926	142.107	AT1G50350	0	CG	Hypo-methylation
Chr1	19321566	19321622	57	10	0.673732	0.0182898	0.655442	161.691	AT1G51980	1434	CG	Hypo-methylation
Chr1	19354373	19354456	84	10	0.792535	0.0722139	0.720321	197.859	AT1TE64110	-20	CG	Hypo-methylation
Chr1	19569631	19569710	80	8	0.0129413	0.765449	-0.752508	-153.51	AT1G52530	0	CG	Hyper-methylation
Chr1	19744227	19744361	135	15	0.0308925	0.672373	-0.64148	-229.031	AT1TE65255	0	CG	Hyper-methylation
Chr1	19963183	19964075	893	92	0.0286508	0.871831	-0.84318	-2798.15	AT1G53480	0	CG	Hyper-methylation
Chr1	20043978	20044091	114	6	0.821901	0.0403381	0.781563	94.8955	AT1TE66245	0	CG	Hypo-methylation
Chr1	20066169	20066220	52	10	0.0796124	0.759311	-0.679699	-136.915	AT1G53750	0	CG	Hyper-methylation
Chr1	20433941	20434298	358	38	0.0225953	0.845275	-0.82268	-1112.04	AT1G54760	0	CG	Hyper-methylation
Chr1	20804876	20804927	52	6	0.0341753	0.655748	-0.621573	-69.8785	AT1G55680	0	CG	Hyper-methylation
Chr1	21039642	21039795	154	4	0.737786	0.0275348	0.710251	43.6651	AT1TE69470	0	CG	Hypo-methylation
Chr1	21046797	21046848	52	10	0.0729899	0.877835	-0.804845	-223.427	AT1G56230	0	CG	Hyper-methylation
Chr1	21101489	21101542	54	8	0.714029	0.0713164	0.642713	110.414	AT1G56380	0	CG	Hypo-methylation
Chr1	21127514	21127569	56	4	0.915166	0.0121371	0.903029	99.5346	AT1TE69830	0	CG	Hypo-methylation
Chr1	21138953	21139016	64	8	0.010313	0.825332	-0.815019	-153.428	AT1G56440	0	CG	Hyper-methylation
Chr1	21191015	21191085	71	8	0.790009	0.0222526	0.767757	159.23	AT1G56555	37	CG	Hypo-methylation
Chr1	21341737	21342067	331	30	0.0561386	0.828867	-0.772728	-768.799	AT1TE70480	0	CG	Hyper-methylation
Chr1	21342129	21342285	157	13	0.044928	0.642243	-0.597315	-154.539	AT1TE70480	0	CG	Hyper-methylation
Chr1	21486121	21486176	56	10	0.763462	0.0557578	0.707704	159.093	AT1G58050	0	CG	Hypo-methylation
Chr1	21543364	21543417	54	10	0.0853363	0.799976	-0.71464	-186.865	AT1G58190	0	CG	Hyper-methylation
Chr1	21548981	21549066	86	8	0.0212548	0.781437	-0.760183	-131.029	AT1G58200	0	CG	Hyper-methylation
Chr1	21585366	21585421	56	9	0.738449	0.0762514	0.662197	158.251	AT1G58248	616	CG	Hypo-methylation
Chr1	21672523	21672622	100	4	0.0228325	0.832729	-0.809896	-77.7473	AT1TE71505	30	CG	Hyper-methylation
Chr1	21681380	21681486	107	13	0.88125	0.0342583	0.846992	357.63	AT1TE71540	-38	CG	Hypo-methylation
Chr1	21912556	21912681	126	4	0.756506	0.0318516	0.724655	55.3548	AT1TE72310	0	CG	Hypo-methylation
Chr1	21977135	21977204	70	8	0.676194	0.030649	0.645545	106.497	AT1TE72560	0	CG	Hypo-methylation
Chr1	22107308	22107496	189	14	0.782268	0.099227	0.683041	207.252	AT1G60025	0	CG	Hypo-methylation
Chr1	22287913	22287972	60	4	0.900056	0.0123033	0.887753	91.0784	AT1G60490	0	CG	Hypo-methylation
Chr1	22342216	22342267	52	7	0.659004	0.023529	0.635475	88.9058	AT1G60650	0	CG	Hypo-methylation
Chr1	22509382	22509456	75	6	0.755854	0.0547934	0.701061	60.1044	AT1G61100	0	CG	Hypo-methylation
Chr1	22618180	22618260	81	12	0.0165242	0.738037	-0.721513	-242.002	AT1G61320	0	CG	Hyper-methylation
Chr1	22660098	22660157	60	8	0.0710021	0.769132	-0.69813	-120.855	AT1G61415	0	CG	Hyper-methylation
Chr1	22661434	22661526	93	4	0.800971	0.0344459	0.766525	57.0447	AT1G61420	0	CG	Hypo-methylation
Chr1	22775672	22775755	84	6	0.0121583	0.787185	-0.775026	-88.5379	AT1TE75065	-107	CG	Hyper-methylation
Chr1	22778191	22778264	74	6	0.0279845	0.832635	-0.804651	-118.738	AT1TE75085	-5	CG	Hyper-methylation
Chr1	22812344	22812412	69	12	0.0400737	0.71027	-0.670196	-176.36	AT1G61770	0	CG	Hyper-methylation
Chr1	22830813	22830872	60	6	0.739231	0.0292405	0.709991	75.5754	AT1G61810	0	CG	Hypo-methylation
Chr1	23044304	23044356	53	14	0.717719	0.0122576	0.705461	261.41	AT1G62320	0	CG	Hypo-methylation
Chr1	23229512	23229583	72	10	0.0143671	0.687692	-0.673325	-132.187	AT1G62730	0	CG	Hyper-methylation
Chr1	23305030	23305081	52	5	0.0109815	0.725868	-0.714886	-53.5373	AT1G62920	0	CG	Hyper-methylation
Chr1	23329529	23329601	73	6	0.0307548	0.68222	-0.651465	-73.5568	AT1G62975	0	CG	Hyper-methylation
Chr1	23398365	23398549	185	16	0.0410081	0.794054	-0.753045	-309.69	AT1TE77065	0	CG	Hyper-methylation
Chr1	23515080	23515147	68	8	0.628714	0.0200923	0.608621	103.316	AT1G08613	0	CG	Hypo-methylation
Chr1	23536788	23536839	52	6	0.717871	0.0311371	0.686734	69.3602	AT1G63470	0	CG	Hypo-methylation
Chr1	23742411	23742508	98	12	0.121871	0.883643	-0.761772	-248.976	AT1G63980	0	CG	Hyper-methylation
Chr1	23932482	23932546	65	8	0.688693	0.086077	0.602616	100.078	AT1TE78740	-294	CG	Hypo-methylation
Chr1	23950624	23950787	164	9	0.678684	0.0259829	0.652701	134.867	AT1G08683	-8	CG	Hypo-methylation
Chr1	24327511	24327810	300	12	0.719218	0.0239259	0.695292	169.473	AT1TE79980	2558	CG	Hypo-methylation
Chr1	24409570	24409626	57	10	0.144169	0.792908	-0.648739	-145.521	AT1TE80190	136	CG	Hyper-methylation
Chr1	24478575	24478672	98	10	0.824068	0.129629	0.694439	115.308	AT1G65810	0	CG	Hypo-methylation
Chr1	24492423	24492482	60	10	0.0453631	0.770379	-0.725016	-189.307	AT1G65840	0	CG	Hyper-methylation
Chr1	24728608	24728712	105	12	0.0298242	0.632182	-0.602358	-199.272	AT1G66320	0	CG	Hyper-methylation
Chr1	24826279	24826347	69	14	0.790994	0.0604741	0.73052	265.786	AT1G66540	0	CG	Hypo-methylation
Chr1	24894065	24894122	58	10	0.0286512	0.815482	-0.786831	-224.838	AT1TE81785	0	CG	Hyper-methylation
Chr1	24941051	24941190	140	6	0.0128999	0.6852	-0.6723	-75.9087	AT1TE81920	-522	CG	Hyper-methylation
Chr1	25240230	25240285	56	8	0.0178386	0.702152	-0.684314	-116.577	AT1G67370	0	CG	Hyper-methylation
Chr1	25252017	25252131	115	4	0.865479	0.029915	0.835564	72.2889	AT1G67410	0	CG	Hypo-methylation
Chr1	25303484	25303538	55	10	0.111402	0.724932	-0.613531	-124.902	AT1G67520	0	CG	Hyper-methylation
Chr1	25595360	25595683	324	22	0.0746209	0.816498	-0.741877	-388.85	AT1TE83950	12	CG	Hyper-methylation
Chr1	26096116	26096236	121	8	0.86018	0.0744468	0.785733	149.638	AT1G69420	0	CG	Hypo-methylation
Chr1	26225478	26225539	62	6	0.790935	0.0288002	0.762135	94.693	AT1G69710	0	CG	Hypo-methylation
Chr1	26289766	26289822	57	6	0.0157495	0.696099	-0.680349	-75.2209	AT1G69830	0	CG	Hyper-methylation
Chr1	26623930	26624037	108	4	0.87662	0.0110857	0.865534	74.8032	AT1G70610	0	CG	Hypo-methylation
Chr1	26713747	26713808	62	6	0.760889	0.0305532	0.730336	94.1552	AT1G70840	0	CG	Hypo-methylation
Chr1	26756806	26756868	63	4	0.856268	0.10535	0.750918	55.9627	AT1G70960	0	CG	Hypo-methylation
Chr1	26892663	26892713	51	6	0.777282	0.118702	0.65858	73.0482	AT1G71360	0	CG	Hypo-methylation
Chr1	26973801	26973858	58	12	0.0747755	0.746522	-0.671746	-219.606	AT1G71710	0	CG	Hyper-methylation
Chr1	27121512	27121576	65	16	0.023234	0.68802	-0.664786	-341.635	AT1G72080	0	CG	Hyper-methylation
Chr1	27268768	27268819	52	5	0.009662	0.737505	-0.727843	-55.5372	AT1G72440	0	CG	Hyper-methylation
Chr1	27378543	27378670	128	8	0.0201858	0.849376	-0.82919	-138.489	AT1G72730	0	CG	Hyper-methylation
Chr1	27512128	27512214	87	14	0.772759	0.0212569	0.751502	283.187	AT1G73170	0	CG	Hypo-methylation
Chr1	27718159	27718241	83	12	0.0922098	0.764835	-0.672625	-199.917	AT1G73700	0	CG	Hyper-methylation
Chr1	27805311	27805365	55	7	0.672184	0.0226353	0.649549	123.09	AT1G73960	0	CG	Hypo-methylation
Chr1	28017165	28017239	75	10	0.0989943	0.884374	-0.78538	-208.58	AT1G74550	0	CG	Hyper-methylation
Chr1	28024567	28024628	62	7	0.0146394	0.659749	-0.64511	-100.804	AT1G74590	0	CG	Hyper-methylation
Chr1	28119878	28119928	51	5	0.852316	0.163227	0.689089	52.6703	AT1G74850	0	CG	Hypo-methylation
Chr1	28249671	28249733	63	8	0.0137017	0.772333	-0.758632	-135.193	AT1G75260	187	CG	Hyper-methylation
Chr1	28478554	28478608	55	6	0.868686	0.191347	0.677339	65.6782	AT1G75850	0	CG	Hypo-methylation
Chr1	28515048	28515881	834	60	0.788278	0.0370452	0.751232	1451.96	AT1TE93270	0	CG	Hypo-methylation
Chr1	28515965	28516124	160	36	0.856072	0.0200033	0.836068	1327.02	AT1TE93275	0	CG	Hypo-methylation
Chr1	29246899	29246966	68	4	0.0117959	0.835014	-0.823218	-72.1416	AT1G77770	0	CG	Hyper-methylation
Chr1	29676575	29676673	99	9	0.0252914	0.696204	-0.670913	-120.931	AT1G78920	0	CG	Hyper-methylation
Chr1	29716950	29717001	52	6	0.0127381	0.712194	-0.699456	-59.4567	AT1G79000	0	CG	Hyper-methylation
Chr1	29996496	29996558	63	4	0.0117367	0.858338	-0.846602	-78.5977	AT1G79710	0	CG	Hyper-methylation
Chr1	30061753	30061884	132	10	0.780557	0.0417648	0.738793	151.312	AT1G79920	0	CG	Hypo-methylation
Chr1	30125857	30125914	58	8	0.135935	0.818984	-0.683049	-100.352	AT1G80070	0	CG	Hyper-methylation
Chr2	145370	146429	1060	56	0.0173019	0.802038	-0.784736	-1183.37	AT2G01280	0	CG	Hyper-methylation
Chr2	238867	238922	56	6	0.14914	0.810097	-0.660957	-74.658	AT2G04005	0	CG	Hyper-methylation
Chr2	279828	280022	195	4	0.721904	0.0458204	0.676083	52.0133	AT2G01630	0	CG	Hypo-methylation
Chr2	517171	517273	103	6	0.746285	0.0114406	0.734844	88.459	AT2TE02220	0	CG	Hypo-methylation
Chr2	584846	584896	51	7	0.734229	0.0374176	0.696812	113.552	AT2G02220	0	CG	Hypo-methylation
Chr2	697187	697239	53	10	0.0149731	0.804075	-0.789102	-200.145	AT2G02560	0	CG	Hyper-methylation
Chr2	767965	768039	75	4	0.691955	0.0212001	0.670755	43.6984	AT2TE03370	0	CG	Hypo-methylation
Chr2	878492	878692	201	8	0.81213	0.0758467	0.736283	114.657	AT2TE03915	0	CG	Hypo-methylation
Chr2	1177179	1177391	213	10	0.632497	0.0250936	0.607404	124.346	AT2TE05315	0	CG	Hypo-methylation
Chr2	1178783	1179012	230	18	0.843733	0.0284045	0.815329	426.331	AT2TE05320	4	CG	Hypo-methylation
Chr2	1246063	1246128	66	4	0.0351578	0.69972	-0.664562	-46.8069	AT2TE05630	787	CG	Hyper-methylation
Chr2	1359691	1359757	67	8	0.015654	0.720701	-0.705047	-131.069	AT2TE06200	0	CG	Hyper-methylation
Chr2	1359980	1360161	182	16	0.015122	0.67199	-0.656868	-268.648	AT2TE06200	0	CG	Hyper-methylation
Chr2	1485217	1485349	133	10	0.807376	0.0620611	0.745315	157.032	AT2TE06880	0	CG	Hypo-methylation
Chr2	1498016	1498074	59	14	0.0122226	0.663365	-0.651142	-250.251	AT2TE06930	-859	CG	Hyper-methylation
Chr2	1646083	1646165	83	10	0.712986	0.0375724	0.675413	155.164	AT2G04690	0	CG	Hypo-methylation
Chr2	1663637	1663756	120	10	0.744312	0.0134383	0.730874	174.353	AT2TE07705	0	CG	Hypo-methylation
Chr2	1664618	1664713	96	8	0.784367	0.0635922	0.720775	124.979	AT2TE07720	0	CG	Hypo-methylation
Chr2	1727490	1727558	69	8	0.0135292	0.674956	-0.661427	-125.373	AT2TE08030	0	CG	Hyper-methylation
Chr2	1859288	1859406	119	6	0.842302	0.0372979	0.805004	98.8508	AT2G05160	0	CG	Hypo-methylation
Chr2	1874870	1874928	59	8	0.729911	0.0241185	0.705793	126.212	AT2G05180	-463	CG	Hypo-methylation
Chr2	1944375	1944441	67	8	0.740163	0.0205969	0.719566	128.249	AT2G04895	236	CG	Hypo-methylation
Chr2	2192789	2192990	202	8	0.104409	0.774848	-0.670439	-106.2	AT2TE10100	0	CG	Hyper-methylation
Chr2	2241448	2241522	75	4	0.682081	0.0207102	0.661371	45.7353	AT2TE10365	0	CG	Hypo-methylation
Chr2	2241821	2241910	90	6	0.651839	0.0229042	0.628935	68.152	AT2TE10365	0	CG	Hypo-methylation
Chr2	2414757	2414819	63	8	0.116963	0.750527	-0.633564	-100.22	AT2TE11030	157	CG	Hyper-methylation
Chr2	2518625	2518894	270	24	0.815872	0.0196635	0.796209	606.746	AT2TE11410	0	CG	Hypo-methylation
Chr2	2690222	2690414	193	8	0.0197494	0.744296	-0.724547	-114.191	AT2TE11945	-231	CG	Hyper-methylation
Chr2	2907366	2907425	60	5	0.76792	0.072679	0.695241	66.8897	AT2TE12660	250	CG	Hypo-methylation
Chr2	2908048	2908306	259	8	0.826711	0.0174895	0.809221	139.479	AT2TE12670	0	CG	Hypo-methylation
Chr2	2940877	2940975	99	5	0.739365	0.0550146	0.68435	66.7139	AT2TE12820	0	CG	Hypo-methylation
Chr2	3534557	3534706	150	18	0.777127	0.0259398	0.751187	399.868	AT2TE15415	0	CG	Hypo-methylation
Chr2	4262473	4262729	257	10	0.771924	0.0279023	0.744022	147.567	AT2TE17960	0	CG	Hypo-methylation
Chr2	4308401	4308454	54	4	0.795393	0.0664336	0.72896	53.447	AT2TE18095	333	CG	Hypo-methylation
Chr2	4420331	4420444	114	10	0.766446	0.0425272	0.723919	166.676	AT2TE18505	0	CG	Hypo-methylation
Chr2	4591877	4591982	106	6	0.73239	0.0405371	0.691853	74.6534	AT2TE19040	0	CG	Hypo-methylation
Chr2	4938927	4938994	68	4	0.785127	0.0302681	0.754858	50.7609	AT2TE20275	0	CG	Hypo-methylation
Chr2	5121094	5121220	127	8	0.0304052	0.821592	-0.791187	-144.258	AT2TE21015	2	CG	Hyper-methylation
Chr2	5181015	5181151	137	8	0.0248493	0.776031	-0.751182	-111.259	AT2TE21255	885	CG	Hyper-methylation
Chr2	5407307	5407425	119	6	0.0237202	0.799592	-0.775872	-93.7338	AT2TE21880	0	CG	Hyper-methylation
Chr2	5515035	5515116	82	10	0.711452	0.035928	0.675524	136.943	AT2TE22305	0	CG	Hypo-methylation
Chr2	5873118	5873173	56	8	0.775579	0.0279901	0.747589	144.792	AT2TE23925	0	CG	Hypo-methylation
Chr2	5909999	5910082	84	4	0.0113407	0.852964	-0.841623	-71.0052	AT2G14050	0	CG	Hyper-methylation
Chr2	5950802	5951024	223	14	0.03199	0.766013	-0.734023	-221.649	AT2TE24275	0	CG	Hyper-methylation
Chr2	5976917	5977185	269	12	0.0233041	0.738616	-0.715311	-170.093	AT2G14170	88	CG	Hyper-methylation
Chr2	6012399	6012570	172	8	0.80073	0.0599237	0.740806	119.691	AT2TE24460	0	CG	Hypo-methylation
Chr2	6162773	6162857	85	10	0.762866	0.0654757	0.69739	150.297	AT2TE25030	0	CG	Hypo-methylation
Chr2	6348669	6348752	84	10	0.776791	0.0377872	0.739004	168.577	AT2TE25865	418	CG	Hypo-methylation
Chr2	6361624	6361826	203	20	0.0367114	0.800472	-0.763761	-508.384	AT2G14820	97	CG	Hyper-methylation
Chr2	6578148	6578203	56	8	0.766902	0.0581597	0.708742	123.786	AT2TE26855	-136	CG	Hypo-methylation
Chr2	6591484	6591564	81	6	0.750191	0.0479274	0.702263	77.6327	AT2G15185	0	CG	Hypo-methylation
Chr2	6691233	6691376	144	10	0.0232008	0.839025	-0.815824	-233.841	AT2TE27335	0	CG	Hyper-methylation
Chr2	6706976	6707038	63	8	0.824861	0.0169183	0.807943	168.785	AT2TE27400	0	CG	Hypo-methylation
Chr2	6823481	6823609	129	7	0.728036	0.0513836	0.676652	81.7866	AT2TE27820	0	CG	Hypo-methylation
Chr2	6963155	6963240	86	10	0.782957	0.0494322	0.733525	186.879	AT2TE28345	0	CG	Hypo-methylation
Chr2	7210112	7210165	54	6	0.0217849	0.690258	-0.668473	-74.8319	AT2G16630	0	CG	Hyper-methylation
Chr2	7210590	7210664	75	14	0.140869	0.813544	-0.672675	-225.571	AT2G16630	0	CG	Hyper-methylation
Chr2	7278285	7278411	127	8	0.010688	0.74901	-0.738322	-129.573	AT2TE29680	242	CG	Hyper-methylation
Chr2	7416545	7416615	71	6	0.056483	0.740755	-0.684272	-71.9101	AT2TE30390	0	CG	Hyper-methylation
Chr2	7633000	7633296	297	12	0.0353097	0.750606	-0.715296	-176.8	AT2G06995	0	CG	Hyper-methylation
Chr2	8041571	8041646	76	10	0.0244445	0.73141	-0.706965	-163.062	AT2TE33375	-165	CG	Hyper-methylation
Chr2	8622729	8622904	176	14	0.699868	0.0334745	0.666394	208.901	AT2G19960	0	CG	Hypo-methylation
Chr2	8652660	8652735	76	8	0.128269	0.800567	-0.672298	-91.1326	AT2G20050	0	CG	Hyper-methylation
Chr2	9118108	9118159	52	10	0.155588	0.81509	-0.659503	-133.938	AT2G21300	0	CG	Hyper-methylation
Chr2	9262350	9262541	192	10	0.0469454	0.669912	-0.622966	-130.942	AT2TE39255	80	CG	Hyper-methylation
Chr2	9262739	9262837	99	10	0.126007	0.77889	-0.652883	-136.499	AT2TE39260	0	CG	Hyper-methylation
Chr2	9540363	9540520	158	12	0.829477	0.0321387	0.797339	244.215	AT2G22475	-609	CG	Hypo-methylation
Chr2	9553508	9553591	84	6	0.0292644	0.755669	-0.726405	-88.7233	AT2TE40675	0	CG	Hyper-methylation
Chr2	9573449	9573654	206	10	0.861639	0.087114	0.774525	156.937	AT2G22530	0	CG	Hypo-methylation
Chr2	9595956	9596027	72	8	0.796558	0.0149154	0.781643	158.154	AT2TE40895	-129	CG	Hypo-methylation
Chr2	9625198	9625256	59	5	0.864122	0.0832005	0.780922	91.3044	AT2G22650	0	CG	Hypo-methylation
Chr2	9821004	9821073	70	10	0.140961	0.772858	-0.631897	-142.123	AT2G07865	-173	CG	Hyper-methylation
Chr2	9906911	9906961	51	11	0.0238134	0.643693	-0.61988	-175.37	AT2TE42390	-375	CG	Hyper-methylation
Chr2	10149140	10149201	62	10	0.735021	0.028011	0.70701	179.739	AT2G23834	7	CG	Hypo-methylation
Chr2	10442689	10442913	225	6	0.0670209	0.802812	-0.735791	-83.8682	AT2TE44770	0	CG	Hyper-methylation
Chr2	10554295	10554351	57	8	0.713267	0.067686	0.645581	108.92	AT2TE45295	0	CG	Hypo-methylation
Chr2	10625946	10626003	58	8	0.666263	0.011778	0.654485	106.954	AT2G24990	0	CG	Hypo-methylation
Chr2	10651949	10652043	95	8	0.719817	0.0301743	0.689643	123.979	AT2TE45665	0	CG	Hypo-methylation
Chr2	10678013	10678075	63	4	0.782269	0.0343106	0.747958	57.2058	AT2TE45780	0	CG	Hypo-methylation
Chr2	10957392	10957552	161	4	0.0204779	0.78552	-0.765042	-56.5359	AT2G25730	0	CG	Hyper-methylation
Chr2	11346586	11346694	109	12	0.686106	0.0176532	0.668453	200.49	AT2TE49075	2	CG	Hypo-methylation
Chr2	11429401	11429615	215	8	0.74275	0.0296081	0.713142	122.053	AT2G26800	0	CG	Hypo-methylation
Chr2	11453016	11453078	63	8	0.021768	0.696182	-0.674414	-110.762	AT2G26860	0	CG	Hyper-methylation
Chr2	11502760	11502842	83	8	0.821392	0.0199119	0.801481	164.122	AT2TE49850	37	CG	Hypo-methylation
Chr2	11812909	11813028	120	24	0.0142036	0.767122	-0.752918	-580.639	AT2G00840	0	CG	Hyper-methylation
Chr2	11834801	11835084	284	20	0.806319	0.0140012	0.792318	447.703	AT2TE51470	0	CG	Hypo-methylation
Chr2	12465800	12465884	85	10	0.64838	0.0171861	0.631194	147.66	AT2G29000	751	CG	Hypo-methylation
Chr2	12486475	12486555	81	14	0.100948	0.769159	-0.668211	-243.217	AT2G29065	0	CG	Hyper-methylation
Chr2	12887310	12887382	73	10	0.764088	0.0183419	0.745746	202.136	AT2G30210	65	CG	Hypo-methylation
Chr2	12950198	12950310	113	12	0.671506	0.0400312	0.631475	164.534	AT2G30385	0	CG	Hypo-methylation
Chr2	13235265	13235331	67	10	0.031504	0.858818	-0.827314	-235.175	AT2TE58040	1004	CG	Hyper-methylation
Chr2	13258635	13258694	60	11	0.146687	0.782807	-0.63612	-148.2	AT2G31110	0	CG	Hyper-methylation
Chr2	13317624	13317699	76	14	0.0635856	0.690666	-0.62708	-210.556	AT2G31240	0	CG	Hyper-methylation
Chr2	13532788	13532868	81	4	0.69946	0.0159461	0.683514	47.9434	AT2G31820	0	CG	Hypo-methylation
Chr2	13540735	13540890	156	4	0.0203063	0.748001	-0.727695	-50.1772	AT2TE59525	0	CG	Hyper-methylation
Chr2	13552242	13552318	77	8	0.841549	0.157723	0.683826	93.3499	AT2G31870	0	CG	Hypo-methylation
Chr2	14678662	14678793	132	8	0.736278	0.0346267	0.701652	112.302	AT2TE65120	0	CG	Hypo-methylation
Chr2	14847187	14847249	63	6	0.0114153	0.744286	-0.732871	-86.8038	AT2G35250	0	CG	Hyper-methylation
Chr2	15034512	15034608	97	4	0.72358	0.00994975	0.71363	53.6897	AT2G35770	0	CG	Hypo-methylation
Chr2	15381806	15381868	63	16	0.717278	0.0261232	0.691155	343.646	AT2G36690	0	CG	Hypo-methylation
Chr2	16022245	16022353	109	6	0.801553	0.0741529	0.7274	80.6087	AT2TE71730	0	CG	Hypo-methylation
Chr2	16323649	16323700	52	5	0.762278	0.0347406	0.727538	68.7331	AT2G39130	0	CG	Hypo-methylation
Chr2	16355411	16355600	190	8	0.0231987	0.807684	-0.784486	-143.001	AT2G39190	0	CG	Hyper-methylation
Chr2	16657281	16657359	79	7	0.145321	0.813574	-0.668253	-78.2533	AT2G39890	0	CG	Hyper-methylation
Chr2	16871801	16871881	81	4	0.0204219	0.752069	-0.731647	-49.9136	AT2G40400	0	CG	Hyper-methylation
Chr2	16914275	16914327	53	6	0.0148526	0.728184	-0.713332	-68.4058	AT2G40490	0	CG	Hyper-methylation
Chr2	16991586	16991649	64	4	0.0215337	0.84933	-0.827796	-76.5883	AT2G40730	0	CG	Hyper-methylation
Chr2	17190159	17190278	120	12	0.0536068	0.78365	-0.730044	-203.99	AT2TE77480	0	CG	Hyper-methylation
Chr2	17303038	17303101	64	8	0.762817	0.103106	0.659711	84.2875	AT2G41490	0	CG	Hypo-methylation
Chr2	17323697	17323759	63	8	0.00986816	0.672441	-0.662573	-91.2808	AT2G41530	0	CG	Hyper-methylation
Chr2	17407584	17407679	96	8	0.834902	0.0705112	0.764391	138.161	AT2G41720	-260	CG	Hypo-methylation
Chr2	17634889	17634945	57	6	0.787331	0.0499051	0.737426	98.0161	AT2G42330	-520	CG	Hypo-methylation
Chr2	17893812	17893868	57	6	0.120336	0.825113	-0.704777	-78.4353	AT2G43020	0	CG	Hyper-methylation
Chr2	18130378	18130516	139	4	0.907754	0.029676	0.878078	88.5793	AT2G43750	0	CG	Hypo-methylation
Chr2	18264005	18264134	130	7	0.695042	0.0216379	0.673404	87.7385	AT2G44160	0	CG	Hypo-methylation
Chr2	18938914	18939019	106	4	0.852288	0.0618529	0.790435	56.9817	AT2TE86120	0	CG	Hypo-methylation
Chr2	19263952	19264038	87	6	0.736514	0.0542194	0.682295	76.3392	AT2G46880	536	CG	Hypo-methylation
Chr2	19672758	19672813	56	7	0.114629	0.727959	-0.61333	-90.0544	AT2G48100	0	CG	Hyper-methylation
Chr3	157838	158144	307	14	0.0420448	0.752674	-0.710629	-222.908	AT3TE00670	0	CG	Hyper-methylation
Chr3	471542	471619	78	6	0.869081	0.0745073	0.794574	91.7874	AT3G02320	0	CG	Hypo-methylation
Chr3	480565	480642	78	6	0.0140699	0.760304	-0.746234	-94.2299	AT3G02350	0	CG	Hyper-methylation
Chr3	563715	563768	54	4	0.846432	0.026365	0.820067	66.3972	AT3G02630	0	CG	Hypo-methylation
Chr3	615094	615150	57	8	0.0130783	0.697623	-0.684545	-110.654	AT3G02830	0	CG	Hyper-methylation
Chr3	830427	830505	79	7	0.736672	0.0118264	0.724846	138.724	AT3G03490	0	CG	Hypo-methylation
Chr3	1402136	1402196	61	4	0.868921	0.026455	0.842466	79.6933	AT3G05040	0	CG	Hypo-methylation
Chr3	1404260	1404331	72	8	0.761174	0.0133301	0.747844	118.743	AT3G05040	0	CG	Hypo-methylation
Chr3	1890847	1890897	51	8	0.145794	0.80957	-0.663776	-82.9156	AT3G06250	0	CG	Hyper-methylation
Chr3	2045320	2045393	74	8	0.0122021	0.686117	-0.673915	-122.359	AT3G06560	0	CG	Hyper-methylation
Chr3	2104094	2104146	53	8	0.885273	0.14379	0.741483	122.266	AT3G06660	0	CG	Hypo-methylation
Chr3	2107454	2107545	92	9	0.872148	0.149142	0.723006	124.959	AT3G06670	0	CG	Hypo-methylation
Chr3	2265978	2266036	59	8	0.82068	0.0727565	0.747924	121.685	AT3G07160	0	CG	Hypo-methylation
Chr3	2471906	2471976	71	5	0.805178	0.0333389	0.771839	78.0833	AT3G07740	0	CG	Hypo-methylation
Chr3	2948480	2948560	81	4	0.811332	0.022274	0.789058	59.8928	AT3G09600	0	CG	Hypo-methylation
Chr3	2996284	2996443	160	11	0.643576	0.236421	0.407156	107.599	AT3G09770	0	CG	Hypo-methylation
Chr3	3063317	3063547	231	18	0.0167583	0.823103	-0.806345	-403.266	AT3G09960	0	CG	Hyper-methylation
Chr3	3287579	3287670	92	6	0.726087	0.0105312	0.715556	77.9357	AT3G10530	0	CG	Hypo-methylation
Chr3	3553036	3553086	51	6	0.869471	0.0503444	0.819126	125.415	AT3G11330	0	CG	Hypo-methylation
Chr3	4073182	4073310	129	8	0.0157732	0.772003	-0.75623	-97.588	AT3G12810	0	CG	Hyper-methylation
Chr3	4647802	4647853	52	6	0.0183286	0.614339	-0.596011	-78.6252	AT3G02835	0	CG	Hyper-methylation
Chr3	4968663	4968714	52	5	0.809601	0.158033	0.651568	46.0561	AT3TE20930	0	CG	Hypo-methylation
Chr3	5228606	5228699	94	8	0.746624	0.0131008	0.733523	122.462	AT3TE22000	0	CG	Hypo-methylation
Chr3	5434990	5435040	51	7	0.12738	0.756179	-0.628799	-90.9286	AT3G16010	0	CG	Hyper-methylation
Chr3	5532973	5533050	78	4	0.0121352	0.876773	-0.864638	-79.1469	AT3G16320	0	CG	Hyper-methylation
Chr3	5909767	5909878	112	4	0.0092121	0.911058	-0.901846	-106.624	AT3G17310	0	CG	Hyper-methylation
Chr3	5983469	5983594	126	10	0.766127	0.0670473	0.699079	137.039	AT3G17480	0	CG	Hypo-methylation
Chr3	6285464	6285523	60	10	0.788765	0.0902298	0.698535	157.93	AT3G18310	0	CG	Hypo-methylation
Chr3	6300101	6300159	59	11	0.655539	0.0141305	0.641409	156.51	AT3G18350	0	CG	Hypo-methylation
Chr3	6806948	6807077	130	6	0.862151	0.0105608	0.85159	129.479	AT3G19590	0	CG	Hypo-methylation
Chr3	6827562	6827643	82	4	0.765177	0.0311573	0.73402	54.2147	AT3G19670	344	CG	Hypo-methylation
Chr3	7232172	7232256	85	8	0.021823	0.671812	-0.649989	-119.286	AT3G20690	0	CG	Hyper-methylation
Chr3	7480879	7481068	190	12	0.776156	0.0642307	0.711926	168.602	AT3G21280	0	CG	Hypo-methylation
Chr3	7841356	7841540	185	4	0.0172074	0.774468	-0.75726	-62.3361	AT3G22220	0	CG	Hyper-methylation
Chr3	8135594	8135645	52	8	0.815342	0.0166173	0.798725	147.092	AT3G22942	0	CG	Hypo-methylation
Chr3	8138363	8138812	450	28	0.845638	0.0710415	0.774597	573.61	AT3TE34140	0	CG	Hypo-methylation
Chr3	8170146	8170201	56	6	0.738238	0.0221447	0.716093	82.595	AT3TE34225	0	CG	Hypo-methylation
Chr3	8453057	8453116	60	8	0.770574	0.0304389	0.740135	148.113	AT3G23560	788	CG	Hypo-methylation
Chr3	8816864	8816932	69	10	0.787364	0.020535	0.766829	209.566	AT3TE36940	560	CG	Hypo-methylation
Chr3	9135977	9136125	149	4	0.740005	0.0115793	0.728425	51.9944	AT3G25080	-507	CG	Hypo-methylation
Chr3	9145717	9145767	51	4	0.7388	0.012482	0.726318	57.9989	AT3G25100	0	CG	Hypo-methylation
Chr3	9479089	9479342	254	16	0.0141654	0.720119	-0.705954	-249.392	AT3TE39565	0	CG	Hyper-methylation
Chr3	9534756	9534806	51	6	0.0114229	0.714491	-0.703069	-66.5761	AT3G26090	0	CG	Hyper-methylation
Chr3	9679117	9679193	77	14	0.676658	0.0282257	0.648432	221.669	AT3G26440	0	CG	Hypo-methylation
Chr3	9852347	9852418	72	10	0.0857572	0.735136	-0.649379	-130.213	AT3G26782	0	CG	Hyper-methylation
Chr3	9985483	9985549	67	10	0.00999644	0.77878	-0.768784	-213.453	AT3G27080	0	CG	Hyper-methylation
Chr3	10124432	10124826	395	14	0.801573	0.0179824	0.783591	278.163	AT3G27350	-834	CG	Hypo-methylation
Chr3	10360057	10360213	157	8	0.0346277	0.753933	-0.719306	-118.887	AT3G27920	1578	CG	Hyper-methylation
Chr3	10452844	10452901	58	10	0.635001	0.0129325	0.622069	150.594	AT3G28080	0	CG	Hypo-methylation
Chr3	10720349	10720447	99	8	0.808595	0.0278706	0.780724	149.911	AT3TE44555	-1274	CG	Hypo-methylation
Chr3	11053959	11054050	92	10	0.0375928	0.780461	-0.742868	-167.533	AT3TE45965	0	CG	Hyper-methylation
Chr3	11101085	11101490	406	21	0.0361253	0.790604	-0.754479	-392.43	AT3G29130	0	CG	Hyper-methylation
Chr3	11206610	11206684	75	4	0.730023	0.042523	0.6875	53.3828	AT3TE46675	-110	CG	Hypo-methylation
Chr3	11236948	11237184	237	22	0.017815	0.780986	-0.763171	-444.499	AT3G29280	0	CG	Hyper-methylation
Chr3	11241484	11241541	58	6	0.0253976	0.717917	-0.69252	-93.0657	AT3TE46830	-101	CG	Hyper-methylation
Chr3	11454137	11454249	113	6	0.0169173	0.790329	-0.773412	-85.6888	AT3G29633	-610	CG	Hyper-methylation
Chr3	11785261	11785333	73	8	0.769265	0.157438	0.611827	99.9316	AT3G30160	0	CG	Hypo-methylation
Chr3	12474009	12474190	182	6	0.758323	0.0682928	0.69003	71.0679	AT3TE51495	9	CG	Hypo-methylation
Chr3	12657253	12657358	106	10	0.0310339	0.764708	-0.733674	-179.867	AT3TE52060	0	CG	Hyper-methylation
Chr3	12799509	12799770	262	16	0.0103827	0.78932	-0.778937	-291.029	AT3TE52615	182	CG	Hyper-methylation
Chr3	12799955	12800097	143	4	0.0495328	0.796943	-0.74741	-55.8657	AT3TE52620	0	CG	Hyper-methylation
Chr3	13328846	13328905	60	14	0.885481	0.0405521	0.844929	474.994	AT3TE54480	0	CG	Hypo-methylation
Chr3	13332225	13332476	252	10	0.741486	0.0298213	0.711664	137.982	AT3TE54490	0	CG	Hypo-methylation
Chr3	14308260	14308457	198	14	0.721652	0.0728581	0.648794	197.586	AT3G42148	-92	CG	Hypo-methylation
Chr3	14470021	14470097	77	8	0.637508	0.0300835	0.607424	106.978	AT3TE59300	0	CG	Hypo-methylation
Chr3	14761735	14761800	66	6	0.0471714	0.79788	-0.750709	-87.4666	AT3TE60370	374	CG	Hyper-methylation
Chr3	14762058	14762142	85	8	0.0610677	0.787382	-0.726315	-130.537	AT3TE60370	32	CG	Hyper-methylation
Chr3	14812556	14812887	332	16	0.866148	0.017413	0.848735	386.459	AT3TE60495	0	CG	Hypo-methylation
Chr3	15335377	15335528	152	12	0.841638	0.135538	0.7061	199.741	AT3TE62275	16	CG	Hypo-methylation
Chr3	15371707	15371811	105	10	0.773768	0.047083	0.726685	165.238	AT3TE62415	0	CG	Hypo-methylation
Chr3	15767851	15767960	110	10	0.67866	0.0373445	0.641315	138.47	AT3TE63750	0	CG	Hypo-methylation
Chr3	15776948	15777298	351	14	0.0209518	0.814937	-0.793985	-292.643	AT3TE63785	0	CG	Hyper-methylation
Chr3	15808217	15808277	61	6	0.0318999	0.802302	-0.770402	-88.1348	AT3TE63900	-155	CG	Hyper-methylation
Chr3	15857445	15857610	166	14	0.0159617	0.680784	-0.664823	-194.961	AT3TE64150	0	CG	Hyper-methylation
Chr3	15925550	15925689	140	14	0.0358251	0.763633	-0.727808	-235.628	AT3TE64445	0	CG	Hyper-methylation
Chr3	15957356	15957486	131	8	0.794234	0.0275264	0.766707	130.754	AT3TE64580	-339	CG	Hypo-methylation
Chr3	15976486	15976697	212	14	0.0382713	0.793671	-0.755399	-236.438	AT3TE64670	0	CG	Hyper-methylation
Chr3	16146411	16146471	61	8	0.021774	0.762854	-0.74108	-130.863	AT3TE65380	0	CG	Hyper-methylation
Chr3	16206896	16206964	69	12	0.73934	0.0227795	0.71656	250.328	AT3TE65645	-41	CG	Hypo-methylation
Chr3	16277183	16277299	117	8	0.745237	0.0354628	0.709775	119.176	AT3TE65960	0	CG	Hypo-methylation
Chr3	16419044	16419100	57	6	0.0302378	0.82396	-0.793722	-103.892	AT3TE66525	0	CG	Hyper-methylation
Chr3	16584321	16584849	529	34	0.769777	0.0219974	0.747779	651.529	AT3TE67265	30	CG	Hypo-methylation
Chr3	16754632	16754682	51	8	0.0155592	0.825597	-0.810038	-195.997	AT3G45638	534	CG	Hyper-methylation
Chr3	16754872	16755069	198	14	0.0231038	0.890179	-0.867075	-405.238	AT3G45638	147	CG	Hyper-methylation
Chr3	16764845	16764917	73	8	0.0597682	0.6588	-0.599032	-111.279	AT3TE67930	-70	CG	Hyper-methylation
Chr3	16943098	16943215	118	10	0.755256	0.0582718	0.696984	147.412	AT3G07325	-1560	CG	Hypo-methylation
Chr3	17187545	17187712	168	12	0.716586	0.0253886	0.691197	201.86	AT3G46650	0	CG	Hypo-methylation
Chr3	17307564	17307614	51	6	0.0114219	0.739116	-0.727694	-67.6328	AT3G46980	0	CG	Hyper-methylation
Chr3	17612254	17612309	56	14	0.0227415	0.610835	-0.588094	-199.962	AT3G47760	0	CG	Hyper-methylation
Chr3	17663267	17663370	104	8	0.0952698	0.797833	-0.702563	-110.233	AT3TE71560	0	CG	Hyper-methylation
Chr3	17735596	17735685	90	5	0.0163572	0.71683	-0.700473	-50.329	AT3G48050	0	CG	Hyper-methylation
Chr3	17978338	17978420	83	4	0.835051	0.0729058	0.762145	55.8135	AT3G07985	241	CG	Hypo-methylation
Chr3	18122516	18122582	67	10	0.0112489	0.777625	-0.766376	-160.143	AT3G48860	0	CG	Hyper-methylation
Chr3	18458042	18458092	51	6	0.0558585	0.659965	-0.604107	-77.3131	AT3TE74890	0	CG	Hyper-methylation
Chr3	19161128	19161225	98	6	0.0170688	0.770774	-0.753706	-68.115	AT3G51650	0	CG	Hyper-methylation
Chr3	19630448	19630499	52	8	0.714331	0.0334352	0.680895	131.694	AT3G52940	0	CG	Hypo-methylation
Chr3	19716588	19716648	61	12	0.0148714	0.724418	-0.709547	-224.462	AT3G53190	0	CG	Hyper-methylation
Chr3	19794978	19795152	175	4	0.0290932	0.778031	-0.748937	-52.8762	AT3G53390	0	CG	Hyper-methylation
Chr3	19830954	19831008	55	8	0.0156321	0.653377	-0.637745	-100.289	AT3G53480	0	CG	Hyper-methylation
Chr3	19971296	19971437	142	8	0.771526	0.0404587	0.731067	113.131	AT3G53940	0	CG	Hypo-methylation
Chr3	20030599	20030740	142	8	0.704085	0.032523	0.671562	104.419	AT3G08370	171	CG	Hypo-methylation
Chr3	20061814	20062000	187	12	0.753848	0.0860874	0.66776	176.868	AT3G54190	0	CG	Hypo-methylation
Chr3	20124100	20124208	109	8	0.16806	0.914746	-0.746686	-108.161	AT3G54350	0	CG	Hyper-methylation
Chr3	20127937	20128098	162	14	0.789206	0.0405815	0.748625	290.234	AT3G54360	30	CG	Hypo-methylation
Chr3	20221402	20221487	86	4	0.813833	0.0260205	0.787813	63.298	AT3G54625	0	CG	Hypo-methylation
Chr3	20685847	20686077	231	16	0.0149594	0.778608	-0.763649	-252.784	AT3G08585	0	CG	Hyper-methylation
Chr3	20686266	20686520	255	10	0.0133245	0.749359	-0.736035	-160.458	AT3G08585	21	CG	Hyper-methylation
Chr3	20821541	20821625	85	8	0.0201338	0.689899	-0.669765	-104.724	AT3G56110	0	CG	Hyper-methylation
Chr3	20993404	20993464	61	8	0.835334	0.0230864	0.812248	179.192	AT3G56680	0	CG	Hypo-methylation
Chr3	21277345	21277438	94	6	0.0182352	0.723906	-0.705671	-79.3111	AT3G57480	0	CG	Hyper-methylation
Chr3	21811042	21811118	77	8	0.894489	0.125963	0.768526	117.32	AT3G59020	0	CG	Hypo-methylation
Chr3	21814119	21814310	192	4	0.809455	0.0218781	0.787577	67.6768	AT3G59020	0	CG	Hypo-methylation
Chr3	21822731	21822797	67	4	0.0162181	0.865637	-0.849419	-66.3179	AT3G59040	0	CG	Hyper-methylation
Chr3	21953457	21953561	105	10	0.155968	0.836043	-0.680074	-110.382	AT3G59410	0	CG	Hyper-methylation
Chr3	22370688	22370738	51	9	0.0119887	0.596616	-0.584627	-139.394	AT3G09445	0	CG	Hyper-methylation
Chr3	22450422	22450511	90	8	0.710576	0.0278416	0.682735	88.507	AT3G60740	0	CG	Hypo-methylation
Chr3	22540732	22540877	146	13	0.0153623	0.685055	-0.669692	-205.556	AT3TE91825	0	CG	Hyper-methylation
Chr3	22875836	22875891	56	6	0.792003	0.0125045	0.779498	110.215	AT3G61800	0	CG	Hypo-methylation
Chr3	23052552	23052719	168	6	0.848947	0.0434041	0.805543	92.4262	AT3G62290	0	CG	Hypo-methylation
Chr3	23130781	23130960	180	28	0.762449	0.0481156	0.714334	623.834	AT3G62528	523	CG	Hypo-methylation
Chr3	23306595	23306712	118	4	0.0314865	0.843496	-0.812009	-66.1066	AT3G63070	0	CG	Hyper-methylation
Chr3	23357918	23357970	53	8	0.0919945	0.808763	-0.716768	-145.559	AT3G63220	0	CG	Hyper-methylation
Chr4	96152	96302	151	12	0.773505	0.0381362	0.735369	197.526	AT4G00230	0	CG	Hypo-methylation
Chr4	199605	199660	56	8	0.0149362	0.628313	-0.613377	-102.728	AT4G03615	0	CG	Hyper-methylation
Chr4	449868	449930	63	8	0.0427493	0.75424	-0.711491	-100.804	AT4G01030	0	CG	Hyper-methylation
Chr4	699870	699934	65	8	0.815286	0.0553995	0.759886	146.255	AT4G01630	-633	CG	Hypo-methylation
Chr4	796581	796646	66	6	0.0148506	0.675815	-0.660965	-62.0154	AT4G01850	0	CG	Hyper-methylation
Chr4	817373	817569	197	14	0.747803	0.0389574	0.708845	225.773	AT4G01890	0	CG	Hypo-methylation
Chr4	1130847	1130999	153	4	0.928288	0.0194232	0.908865	103.021	AT4G02570	0	CG	Hypo-methylation
Chr4	1169005	1169079	75	4	0.0186936	0.74898	-0.730286	-54.0653	AT4G02660	0	CG	Hyper-methylation
Chr4	1376700	1376857	158	12	0.645274	0.0245565	0.620718	135.031	AT4G03110	0	CG	Hypo-methylation
Chr4	1441355	1441408	54	10	0.0134318	0.682914	-0.669482	-162.605	AT4G03280	0	CG	Hyper-methylation
Chr4	1518688	1518807	120	6	0.876128	0.0398241	0.836304	114.85	AT4G03430	0	CG	Hypo-methylation
Chr4	1590802	1590857	56	4	0.743737	0.0328891	0.710848	49.1089	AT4G03570	0	CG	Hypo-methylation
Chr4	1869625	1869686	62	4	0.741053	0.0231156	0.717938	47.6782	AT4G03935	0	CG	Hypo-methylation
Chr4	1995114	1995392	279	12	0.744259	0.0542329	0.690026	156.376	AT4TE09515	0	CG	Hypo-methylation
Chr4	2137598	2137724	127	10	0.0473266	0.778327	-0.731001	-157.658	AT4TE10160	-6	CG	Hyper-methylation
Chr4	2317032	2317181	150	8	0.0419263	0.685698	-0.643772	-94.9093	AT4G04605	0	CG	Hyper-methylation
Chr4	2421148	2421217	70	6	0.0244123	0.856013	-0.831601	-133.066	AT4G04750	0	CG	Hyper-methylation
Chr4	2566483	2566680	198	20	0.0141037	0.785606	-0.771503	-489.475	AT4TE12015	18	CG	Hyper-methylation
Chr4	2584282	2584428	147	8	0.0111325	0.750508	-0.739375	-135.193	AT4TE12105	325	CG	Hyper-methylation
Chr4	4197787	4197870	84	10	0.103044	0.799795	-0.69675	-146.384	AT4G07400	0	CG	Hyper-methylation
Chr4	4803352	4803435	84	12	0.636922	0.0365562	0.600366	177.907	AT4G07960	0	CG	Hypo-methylation
Chr4	4850551	4850707	157	6	0.0135122	0.809258	-0.795746	-98.3572	AT4TE20185	0	CG	Hyper-methylation
Chr4	4870365	4870555	191	6	0.0301239	0.771518	-0.741394	-83.8829	AT4TE20275	82	CG	Hyper-methylation
Chr4	4973476	4973693	218	18	0.751586	0.0913727	0.660214	271.353	AT4TE20760	0	CG	Hypo-methylation
Chr4	4995715	4996053	339	24	0.775461	0.0881507	0.68731	378.715	AT4TE20860	0	CG	Hypo-methylation
Chr4	5242458	5242523	66	8	0.178131	0.798994	-0.620863	-101.313	AT4TE21830	0	CG	Hyper-methylation
Chr4	5301337	5301444	108	10	0.658446	0.0186323	0.639813	137.641	AT4TE22075	-4	CG	Hypo-methylation
Chr4	5384849	5384900	52	6	0.750976	0.0288753	0.7221	99.236	AT4G08470	0	CG	Hypo-methylation
Chr4	5467920	5468008	89	6	0.819202	0.120173	0.699029	79.4213	AT4TE22905	-17	CG	Hypo-methylation
Chr4	5635079	5635191	113	6	0.729421	0.0159394	0.713482	86.9093	AT4G05605	0	CG	Hypo-methylation
Chr4	5864949	5865013	65	9	0.721893	0.0927089	0.629184	125.924	AT4TE24680	-326	CG	Hypo-methylation
Chr4	5970887	5971097	211	22	0.784458	0.0590089	0.725449	412.683	AT4TE25100	0	CG	Hypo-methylation
Chr4	5987201	5988067	867	30	0.0428481	0.812403	-0.769555	-556.344	AT4TE25200	0	CG	Hyper-methylation
Chr4	5988123	5988447	325	19	0.0351404	0.805227	-0.770087	-298.281	AT4TE25200	0	CG	Hyper-methylation
Chr4	6144420	6144873	454	30	0.0185199	0.762732	-0.744212	-600.17	AT4G09740	0	CG	Hyper-methylation
Chr4	6187925	6188050	126	16	0.0374291	0.835262	-0.797833	-400.122	AT4TE26210	0	CG	Hyper-methylation
Chr4	6214126	6214180	55	6	0.0120096	0.709463	-0.697453	-89.4038	AT4TE26345	0	CG	Hyper-methylation
Chr4	6281771	6281878	108	10	0.83626	0.0265122	0.809747	211.985	AT4TE26705	-136	CG	Hypo-methylation
Chr4	6563392	6563465	74	6	0.783589	0.059016	0.724573	82.2217	AT4TE28070	-602	CG	Hypo-methylation
Chr4	6617591	6617678	88	14	0.0224939	0.737025	-0.714531	-222.712	AT4G10740	0	CG	Hyper-methylation
Chr4	6620505	6620556	52	5	0.71407	0.0252919	0.688778	67.8287	AT4G10760	0	CG	Hypo-methylation
Chr4	6754339	6754389	51	8	0.0246482	0.760848	-0.7362	-133.781	AT4TE29025	0	CG	Hyper-methylation
Chr4	6784101	6784151	51	8	0.0420963	0.732175	-0.690078	-148.256	AT4G11130	0	CG	Hyper-methylation
Chr4	7154598	7154701	104	16	0.0383859	0.764722	-0.726336	-341.376	AT4TE31075	0	CG	Hyper-methylation
Chr4	7330184	7330275	92	8	0.0221506	0.719944	-0.697793	-123.943	AT4TE31930	-14	CG	Hyper-methylation
Chr4	7945464	7945566	103	10	0.0306688	0.715082	-0.684414	-161.585	AT4G13660	-118	CG	Hyper-methylation
Chr4	7993842	7993929	88	4	0.864352	0.0326156	0.831737	69.8179	AT4G13780	0	CG	Hypo-methylation
Chr4	8088055	8088333	279	22	0.815849	0.0392805	0.776569	481.391	AT4G13992	0	CG	Hypo-methylation
Chr4	8088732	8088811	80	12	0.842784	0.029947	0.812837	306.91	AT4G13992	0	CG	Hypo-methylation
Chr4	8098476	8098538	63	8	0.0155727	0.776897	-0.761325	-133.402	AT4G14030	0	CG	Hyper-methylation
Chr4	8170731	8170912	182	8	0.198931	0.673451	-0.47452	-138.694	AT4G14160	0	CG	Hyper-methylation
Chr4	8231928	8232024	97	8	0.823546	0.149811	0.673735	85.1467	AT4G14300	0	CG	Hypo-methylation
Chr4	8238528	8238677	150	4	0.769379	0.0199067	0.749473	54.5739	AT4G14310	0	CG	Hypo-methylation
Chr4	8498796	8498856	61	8	0.724521	0.0318049	0.692716	98.1666	AT4G14790	0	CG	Hypo-methylation
Chr4	8544767	8544836	70	4	0.669482	0.011163	0.658319	37.8856	AT4G14950	-190	CG	Hypo-methylation
Chr4	8701912	8701975	64	14	0.709237	0.0662717	0.642965	232.515	AT4G15236	0	CG	Hypo-methylation
Chr4	8855564	8855703	140	6	0.022755	0.731902	-0.709147	-74.67	AT4TE39580	0	CG	Hyper-methylation
Chr4	8898273	8898344	72	12	0.6711	0.0318638	0.639237	178.634	AT4G15570	0	CG	Hypo-methylation
Chr4	9153617	9153667	51	6	0.667542	0.010692	0.65685	68.2594	AT4G16155	0	CG	Hypo-methylation
Chr4	9219325	9219390	66	6	0.0236496	0.902031	-0.878382	-126.782	AT4G16310	0	CG	Hyper-methylation
Chr4	9234857	9234938	82	4	0.907381	0.0198546	0.887526	96.5624	AT4G16340	0	CG	Hypo-methylation
Chr4	9578726	9578787	62	6	0.0105319	0.75187	-0.741338	-87.0635	AT4G17020	0	CG	Hyper-methylation
Chr4	9591279	9591447	169	6	0.0205746	0.914312	-0.893738	-140.422	AT4G17050	0	CG	Hyper-methylation
Chr4	9621449	9621588	140	4	0.0101201	0.866101	-0.855981	-87.2132	AT4G17140	0	CG	Hyper-methylation
Chr4	9678444	9678509	66	8	0.823912	0.0612503	0.762661	129.956	AT4G17270	0	CG	Hypo-methylation
Chr4	9689490	9689619	130	8	0.0137673	0.771971	-0.758204	-112.549	AT4G17330	0	CG	Hyper-methylation
Chr4	9867373	9867448	76	10	0.722159	0.0222945	0.699864	155.552	AT4G17740	0	CG	Hypo-methylation
Chr4	9902330	9902537	208	22	0.747835	0.0358279	0.712007	458.619	AT4TE44960	0	CG	Hypo-methylation
Chr4	10156737	10156806	70	8	0.0246402	0.731688	-0.707048	-139.548	AT4TE46240	380	CG	Hyper-methylation
Chr4	10245886	10245985	100	4	0.0122579	0.854305	-0.842047	-70.2036	AT4G18600	0	CG	Hyper-methylation
Chr4	10294212	10294269	58	8	0.0181323	0.747769	-0.729637	-147.368	AT4TE46920	0	CG	Hyper-methylation
Chr4	10411984	10412079	96	8	0.581101	0.189116	0.391985	87.1569	AT4G19010	0	CG	Hypo-methylation
Chr4	10587738	10587789	52	6	0.017323	0.659322	-0.641999	-67.2477	AT4G19420	0	CG	Hyper-methylation
Chr4	10862997	10863078	82	4	0.0209932	0.784272	-0.763279	-53.9737	AT4G20070	0	CG	Hyper-methylation
Chr4	11145411	11145475	65	6	0.740157	0.0233954	0.716762	93.7861	AT4G20810	-1815	CG	Hypo-methylation
Chr4	11212806	11212878	73	6	0.0204592	0.706651	-0.686192	-67.006	AT4G20960	0	CG	Hyper-methylation
Chr4	11294949	11295051	103	9	0.146543	0.812142	-0.665599	-110.336	AT4G21192	0	CG	Hyper-methylation
Chr4	11328549	11328643	95	10	0.688659	0.0107537	0.677905	126.666	AT4G21260	0	CG	Hypo-methylation
Chr4	11348917	11348977	61	10	0.850053	0.0814968	0.768556	197.68	AT4G21326	0	CG	Hypo-methylation
Chr4	12183235	12183307	73	12	0.0645456	0.646016	-0.58147	-171.298	AT4G23300	0	CG	Hyper-methylation
Chr4	12768652	12768894	243	20	0.0557191	0.848946	-0.793227	-448.994	AT4G24770	0	CG	Hyper-methylation
Chr4	13090628	13090766	139	18	0.811514	0.0216577	0.789856	414.445	AT4G25690	0	CG	Hypo-methylation
Chr4	14315206	14315260	55	16	0.637988	0.0181671	0.619821	282.046	AT4G29050	0	CG	Hypo-methylation
Chr4	14432838	14432890	53	10	0.0224892	0.701118	-0.678629	-169.827	AT4G29290	0	CG	Hyper-methylation
Chr4	14563336	14563389	54	8	0.826785	0.14752	0.679265	110.004	AT4G29735	0	CG	Hypo-methylation
Chr4	14659946	14660049	104	9	0.762287	0.142851	0.619436	90.7054	AT4G29950	0	CG	Hypo-methylation
Chr4	14757314	14757365	52	6	0.0714179	0.889808	-0.81839	-130.181	AT4G30160	0	CG	Hyper-methylation
Chr4	14788261	14788348	88	6	0.0175618	0.694244	-0.676682	-56.9026	AT4G30200	0	CG	Hyper-methylation
Chr4	15364911	15365030	120	8	0.826612	0.181772	0.64484	79.3711	AT4G31750	0	CG	Hypo-methylation
Chr4	15406843	15406896	54	6	0.847728	0.0108306	0.836897	133.487	AT4G31860	0	CG	Hypo-methylation
Chr4	15502857	15502907	51	8	0.804789	0.133999	0.67079	94.6024	AT4G32060	0	CG	Hypo-methylation
Chr4	16427225	16427278	54	6	0.826627	0.0402474	0.78638	107.053	AT4G34340	0	CG	Hypo-methylation
Chr4	17228247	17228411	165	12	0.840107	0.0146225	0.825485	270.937	AT4TE83060	0	CG	Hypo-methylation
Chr4	17745461	17745563	103	18	0.69429	0.02184	0.67245	330.839	AT4G37760	0	CG	Hypo-methylation
Chr5	48032	48170	139	6	0.75528	0.022314	0.732966	91.2236	AT5G01130	0	CG	Hypo-methylation
Chr5	119570	119726	157	4	0.91708	0.0138442	0.903235	91.8681	AT5G01290	0	CG	Hypo-methylation
Chr5	234459	234578	120	14	0.792393	0.013363	0.77903	306.045	AT5G01620	0	CG	Hypo-methylation
Chr5	296197	296273	77	6	0.0119348	0.811246	-0.799311	-105.01	AT5G01770	0	CG	Hyper-methylation
Chr5	475489	475618	130	4	0.0837651	0.834821	-0.751055	-52.7939	AT5G02310	0	CG	Hyper-methylation
Chr5	590933	591008	76	14	0.0157725	0.691566	-0.675793	-218.058	AT5G02620	0	CG	Hyper-methylation
Chr5	595406	595548	143	16	0.042588	0.771238	-0.72865	-330.52	AT5G02640	-351	CG	Hyper-methylation
Chr5	634369	634422	54	8	0.723979	0.0439577	0.680022	100.699	AT5G02790	0	CG	Hypo-methylation
Chr5	641169	641283	115	14	0.187853	0.533355	-0.345501	-132.978	AT5G02810	0	CG	Hyper-methylation
Chr5	928601	928653	53	10	0.035377	0.629048	-0.593671	-119.831	AT5G03640	0	CG	Hyper-methylation
Chr5	1162843	1162898	56	8	0.725801	0.0265589	0.699242	134.99	AT5G04230	0	CG	Hypo-methylation
Chr5	1198580	1198760	181	4	0.884289	0.0229356	0.861353	82.9561	AT5G04290	0	CG	Hypo-methylation
Chr5	1288966	1289019	54	4	0.783438	0.056395	0.727043	43.4727	AT5G04510	0	CG	Hypo-methylation
Chr5	1321958	1322056	99	10	0.75417	0.0235612	0.730608	160.395	AT5G04590	0	CG	Hypo-methylation
Chr5	1573748	1573917	170	8	0.214969	0.632301	-0.417333	-98.4076	AT5G05310	0	CG	Hyper-methylation
Chr5	1630714	1630766	53	8	0.00965245	0.729133	-0.71948	-131.509	AT5G05510	0	CG	Hyper-methylation
Chr5	2406895	2407001	107	8	0.777887	0.114318	0.663569	77.084	AT5G07610	0	CG	Hypo-methylation
Chr5	2506130	2506187	58	6	0.737675	0.0730175	0.664657	88.7438	AT5G07830	0	CG	Hypo-methylation
Chr5	2670345	2670399	55	9	0.0156986	0.797273	-0.781575	-173.292	AT5G08305	0	CG	Hyper-methylation
Chr5	2772248	2772319	72	6	0.0167715	0.706978	-0.690206	-62.0659	AT5G08560	0	CG	Hyper-methylation
Chr5	2920399	2920452	54	8	0.184269	0.885435	-0.701166	-97.0242	AT5G09400	0	CG	Hyper-methylation
Chr5	2940337	2940404	68	22	0.776596	0.10905	0.667546	474.492	AT5G09443	40	CG	Hypo-methylation
Chr5	3337267	3337327	61	6	0.0104325	0.787683	-0.777251	-104.47	AT5G10560	0	CG	Hyper-methylation
Chr5	4704385	4704492	108	8	0.0348408	0.766455	-0.731614	-118.363	AT5G14590	0	CG	Hyper-methylation
Chr5	5055713	5055853	141	4	0.00984217	0.830461	-0.820618	-70.075	AT5G15540	0	CG	Hyper-methylation
Chr5	5152099	5152193	95	4	0.0256477	0.736871	-0.711223	-55.5376	AT5G15800	0	CG	Hyper-methylation
Chr5	5391588	5391642	55	6	0.0961637	0.869927	-0.773763	-98.2634	AT5TE19520	0	CG	Hyper-methylation
Chr5	5446014	5446077	64	8	0.11808	0.843078	-0.724999	-108.595	AT5G16610	0	CG	Hyper-methylation
Chr5	5447263	5447316	54	8	0.784715	0.039438	0.745277	148.467	AT5G16610	0	CG	Hypo-methylation
Chr5	5458616	5458679	64	4	0.802942	0.0144543	0.788488	57.7353	AT5G16630	0	CG	Hypo-methylation
Chr5	6010870	6010965	96	4	0.0110743	0.850984	-0.83991	-75.7579	AT5G18190	0	CG	Hyper-methylation
Chr5	6284977	6285067	91	6	0.829703	0.0200293	0.809674	113.274	AT5G18840	0	CG	Hypo-methylation
Chr5	6627633	6627692	60	8	0.0569091	0.816714	-0.759805	-134.168	AT5G19620	0	CG	Hyper-methylation
Chr5	6642764	6642926	163	4	0.0299243	0.721253	-0.691329	-45.8322	AT5G19660	0	CG	Hyper-methylation
Chr5	6675142	6675199	58	8	0.0181063	0.728835	-0.710729	-103.31	AT5G19740	0	CG	Hyper-methylation
Chr5	6789307	6789400	94	8	0.0248625	0.789083	-0.76422	-143.714	AT5G20100	-536	CG	Hyper-methylation
Chr5	7118624	7118735	112	9	0.0390823	0.694038	-0.654956	-115.947	AT5G20960	0	CG	Hyper-methylation
Chr5	7930761	7930811	51	5	0.210867	0.870013	-0.659146	-48.4877	AT5G23520	0	CG	Hyper-methylation
Chr5	8027279	8027394	116	10	0.0161886	0.738523	-0.722335	-149.554	AT5TE29050	0	CG	Hyper-methylation
Chr5	8187154	8187278	125	22	0.739612	0.0600215	0.679591	457.405	AT5G24160	-451	CG	Hypo-methylation
Chr5	8285290	8285358	69	9	0.124465	0.833148	-0.708683	-147.96	AT5G24320	0	CG	Hyper-methylation
Chr5	8629528	8629657	130	14	0.837101	0.0382839	0.798817	296.424	AT5G03855	0	CG	Hypo-methylation
Chr5	8654204	8654352	149	10	0.759609	0.0144848	0.745124	159.926	AT5TE31300	0	CG	Hypo-methylation
Chr5	8839814	8839871	58	6	0.0192588	0.652792	-0.633533	-77.1068	AT5G25420	0	CG	Hyper-methylation
Chr5	8921445	8921508	64	4	0.715487	0.0509055	0.664582	41.4928	AT5TE32330	-29	CG	Hypo-methylation
Chr5	9225178	9225238	61	12	0.168787	0.802855	-0.634068	-185.244	AT5TE33350	0	CG	Hyper-methylation
Chr5	9225365	9225427	63	10	0.0288707	0.69387	-0.665	-148.038	AT5TE33350	0	CG	Hyper-methylation
Chr5	9263551	9263711	161	4	0.101664	0.895381	-0.793716	-67.0529	AT5G26570	0	CG	Hyper-methylation
Chr5	9488988	9489039	52	5	0.115136	0.772012	-0.656877	-59.028	AT5G26980	0	CG	Hyper-methylation
Chr5	9601502	9601595	94	7	0.727883	0.0110248	0.716858	98.3152	AT5G27247	0	CG	Hypo-methylation
Chr5	9635607	9635671	65	8	0.0294691	0.765842	-0.736373	-129.619	AT5TE34950	0	CG	Hyper-methylation
Chr5	9818859	9819066	208	24	0.0244317	0.763348	-0.738917	-574.412	AT5G04435	0	CG	Hyper-methylation
Chr5	9822443	9822498	56	6	0.861637	0.0155909	0.846046	142.331	AT5G27730	0	CG	Hypo-methylation
Chr5	9851204	9851526	323	18	0.821919	0.0192781	0.802641	375.3	AT5G27807	-1149	CG	Hypo-methylation
Chr5	10265504	10265715	212	18	0.744465	0.0611074	0.683358	274.928	AT5TE37455	0	CG	Hypo-methylation
Chr5	10428659	10428823	165	14	0.0247895	0.734998	-0.710209	-231.524	AT5G28470	0	CG	Hyper-methylation
Chr5	10506141	10506226	86	12	0.818695	0.113268	0.705427	201.886	AT5TE38310	-236	CG	Hypo-methylation
Chr5	10876216	10876311	96	8	0.0685494	0.82613	-0.757581	-123.091	AT5TE39515	38	CG	Hyper-methylation
Chr5	10929714	10929783	70	8	0.125943	0.790894	-0.664951	-91.4171	AT5G28900	0	CG	Hyper-methylation
Chr5	10932036	10932114	79	10	0.669368	0.0269311	0.642437	152.252	AT5G28910	0	CG	Hypo-methylation
Chr5	12449133	12449255	123	10	0.0354997	0.838803	-0.803303	-205.586	AT5TE44160	0	CG	Hyper-methylation
Chr5	12675702	12675908	207	10	0.00967814	0.776815	-0.767137	-173.711	AT5G33406	148	CG	Hyper-methylation
Chr5	13603652	13603784	133	10	0.811553	0.0252556	0.786297	211.084	AT5TE48335	-177	CG	Hypo-methylation
Chr5	13605009	13605232	224	12	0.023124	0.814974	-0.79185	-282.132	AT5TE48340	0	CG	Hyper-methylation
Chr5	13699072	13699297	226	11	0.0349174	0.705481	-0.670563	-166.629	AT5G35510	0	CG	Hyper-methylation
Chr5	14027137	14027206	70	8	0.873936	0.0317058	0.84223	172.884	AT5G35890	-412	CG	Hypo-methylation
Chr5	14035764	14035917	154	12	0.749039	0.0268437	0.722195	186.349	AT5G35910	-272	CG	Hypo-methylation
Chr5	14042471	14042563	93	6	0.657471	0.0196005	0.637871	77.0835	AT5TE50065	-54	CG	Hypo-methylation
Chr5	14113022	14113108	87	8	0.03958	0.729259	-0.689679	-105.911	AT5TE50380	47	CG	Hyper-methylation
Chr5	14210693	14210754	62	8	0.87354	0.0258902	0.84765	198.11	AT5TE50785	329	CG	Hypo-methylation
Chr5	14231714	14231852	139	6	0.034847	0.72066	-0.685813	-73.7517	AT5TE50880	0	CG	Hyper-methylation
Chr5	14265888	14266013	126	16	0.823059	0.0346065	0.788453	390.29	AT5TE50985	-76	CG	Hypo-methylation
Chr5	14696759	14697059	301	9	0.0220164	0.641406	-0.619389	-112.541	AT5TE52920	0	CG	Hyper-methylation
Chr5	14707101	14707345	245	8	0.799976	0.0330039	0.766972	131.289	AT5G37165	0	CG	Hypo-methylation
Chr5	15226427	15226510	84	12	0.787349	0.0420189	0.74533	239.357	AT5TE55090	0	CG	Hypo-methylation
Chr5	15430921	15431129	209	20	0.0210348	0.68512	-0.664086	-330.81	AT5TE55820	-6	CG	Hyper-methylation
Chr5	15505807	15505902	96	10	0.755749	0.138825	0.616924	128.009	AT5TE56050	2	CG	Hypo-methylation
Chr5	15593636	15593714	79	8	0.813451	0.0992409	0.71421	118.233	AT5G38960	0	CG	Hypo-methylation
Chr5	15742213	15742298	86	6	0.0112518	0.621463	-0.610211	-84.193	AT5G39320	-246	CG	Hyper-methylation
Chr5	15759186	15759248	63	12	0.0142914	0.640534	-0.626243	-160.817	AT5G39380	0	CG	Hyper-methylation
Chr5	15817896	15817955	60	8	0.0454835	0.903594	-0.858111	-219.061	AT5G39500	0	CG	Hyper-methylation
Chr5	15865269	15865331	63	6	0.797031	0.1096	0.687432	78.687	AT5G39620	0	CG	Hypo-methylation
Chr5	15892464	15892519	56	6	0.0120162	0.824091	-0.812074	-132.527	AT5TE57390	0	CG	Hyper-methylation
Chr5	16074323	16074377	55	10	0.0099815	0.65532	-0.645339	-167.218	AT5G40210	0	CG	Hyper-methylation
Chr5	16968174	16968370	197	4	0.0378023	0.765177	-0.727375	-50.2091	AT5TE61245	0	CG	Hyper-methylation
Chr5	17169275	17169348	74	10	0.808631	0.149618	0.659013	129.206	AT5G42810	0	CG	Hypo-methylation
Chr5	17223145	17223224	80	6	0.0289753	0.749111	-0.720136	-96.9028	AT5G42950	-1047	CG	Hyper-methylation
Chr5	17317315	17317489	175	4	0.0114545	0.808875	-0.797421	-63.0291	AT5G43130	0	CG	Hyper-methylation
Chr5	17488709	17488885	177	12	0.786949	0.0180727	0.768876	223.298	AT5TE63225	0	CG	Hypo-methylation
Chr5	17606420	17606500	81	6	0.0307724	0.781332	-0.750559	-82.1261	AT5TE63610	575	CG	Hyper-methylation
Chr5	17728939	17729185	247	10	0.0157646	0.74984	-0.734075	-162.197	AT5TE64050	-1814	CG	Hyper-methylation
Chr5	17976913	17977021	109	8	0.807632	0.0352535	0.772379	136.187	AT5G44578	-152	CG	Hypo-methylation
Chr5	18260119	18260231	113	14	0.0934652	0.77579	-0.682325	-231.772	AT5TE65710	0	CG	Hyper-methylation
Chr5	18287959	18288033	75	4	0.0258853	0.687501	-0.661616	-46.5179	AT5G45200	0	CG	Hyper-methylation
Chr5	18897117	18897191	75	10	0.864282	0.113356	0.750925	190.668	AT5G46570	0	CG	Hypo-methylation
Chr5	19178944	19179025	82	14	0.0111522	0.717256	-0.706103	-261.013	AT5TE69000	0	CG	Hyper-methylation
Chr5	19199089	19199165	77	10	0.0310577	0.751355	-0.720297	-184.594	AT5G47300	0	CG	Hyper-methylation
Chr5	19262086	19262174	89	5	0.0652495	0.86744	-0.80219	-87.0929	AT5G47480	0	CG	Hyper-methylation
Chr5	19414143	19414197	55	6	0.016311	0.657181	-0.64087	-75.2599	AT5TE69840	497	CG	Hyper-methylation
Chr5	19830052	19830324	273	36	0.0160371	0.841334	-0.825297	-1192.69	AT5G07295	-82	CG	Hyper-methylation
Chr5	20065463	20065525	63	8	0.12742	0.782992	-0.655572	-98.735	AT5G49470	0	CG	Hyper-methylation
Chr5	20105407	20105457	51	8	0.70587	0.0172116	0.688658	122.397	AT5G49540	0	CG	Hypo-methylation
Chr5	20394242	20394312	71	10	0.0233495	0.686496	-0.663147	-157.842	AT5G07575	0	CG	Hyper-methylation
Chr5	20979284	20979355	72	4	0.177309	0.857654	-0.680345	-41.2218	AT5G51650	-36	CG	Hyper-methylation
Chr5	21224463	21224609	147	6	0.0160763	0.826395	-0.810319	-109.93	AT5G52270	-1859	CG	Hyper-methylation
Chr5	21426033	21426098	66	8	0.00996962	0.843404	-0.833434	-203.907	AT5TE77170	0	CG	Hyper-methylation
Chr5	21456209	21456418	210	18	0.836219	0.0767925	0.759427	357.632	AT5TE77280	-74	CG	Hypo-methylation
Chr5	21538971	21539053	83	12	0.743144	0.0121774	0.730967	171.852	AT5G53130	0	CG	Hypo-methylation
Chr5	21676246	21676296	51	7	0.818356	0.202415	0.615941	89.0123	AT5G53420	444	CG	Hypo-methylation
Chr5	21680930	21681004	75	4	0.814632	0.0113412	0.803291	65.7748	AT5G53430	0	CG	Hypo-methylation
Chr5	21696279	21696359	81	12	0.756794	0.0128679	0.743926	248.757	AT5TE78155	0	CG	Hypo-methylation
Chr5	22497095	22497162	68	8	0.843861	0.0181168	0.825744	193.253	AT5G55540	0	CG	Hypo-methylation
Chr5	22629511	22629561	51	8	0.772112	0.0604408	0.711671	127.962	AT5TE81425	0	CG	Hypo-methylation
Chr5	22663654	22663738	85	7	0.721658	0.0114268	0.710232	106.178	AT5G55960	0	CG	Hypo-methylation
Chr5	22664336	22664412	77	14	0.0109833	0.666378	-0.655394	-144.133	AT5G55960	0	CG	Hyper-methylation
Chr5	22709068	22709134	67	8	0.0268985	0.712042	-0.685143	-124.694	AT5G56070	0	CG	Hyper-methylation
Chr5	22722981	22723051	71	10	0.862208	0.235446	0.626762	105.575	AT5G56130	0	CG	Hypo-methylation
Chr5	22969564	22969675	112	6	0.714715	0.0227741	0.691941	82.2217	AT5G56790	0	CG	Hypo-methylation
Chr5	23131952	23132024	73	10	0.657215	0.0210172	0.636198	148.836	AT5TE83205	1624	CG	Hypo-methylation
Chr5	23667598	23667649	52	4	0.712123	0.0137293	0.698394	51.3673	AT5G58550	0	CG	Hypo-methylation
Chr5	23695202	23695266	65	6	0.0151687	0.78763	-0.772461	-96.087	AT5G58620	0	CG	Hyper-methylation
Chr5	24724700	24724830	131	14	0.736731	0.0352999	0.701431	269.143	AT5G61480	0	CG	Hypo-methylation
Chr5	24786784	24786842	59	10	0.012581	0.62734	-0.614759	-143.252	AT5G61680	0	CG	Hyper-methylation
Chr5	24823946	24824033	88	4	0.0113038	0.837867	-0.826563	-68.1098	AT5G61780	0	CG	Hyper-methylation
Chr5	25076187	25076288	102	4	0.0146127	0.814752	-0.800139	-65.2775	AT5G62460	0	CG	Hyper-methylation
Chr5	26656199	26656318	120	8	0.17602	0.901558	-0.725538	-132.682	AT5G66760	0	CG	Hyper-methylation
Chr1	4293980	4294191	212	7	0.0329643	0.390775	-0.357811	-46.9408	AT1TE13965	0	CHG	Hyper-methylation
Chr1	8391392	8391451	60	7	0.0763691	0.560167	-0.483798	-67.6519	AT1G23720	0	CHG	Hyper-methylation
Chr1	8728763	8728858	96	11	0.0334166	0.467011	-0.433594	-98.327	AT1TE28170	-378	CHG	Hyper-methylation
Chr1	9573094	9573196	103	9	0.00708435	0.35108	-0.343996	-63.0936	AT1TE30840	0	CHG	Hyper-methylation
Chr1	10363001	10363343	343	16	0.0925664	0.609523	-0.516956	-151.461	AT1TE33490	0	CHG	Hyper-methylation
Chr1	13604708	13604809	102	6	0.0130302	0.597222	-0.584191	-66.303	AT1TE44565	-1565	CHG	Hyper-methylation
Chr1	16493255	16493310	56	8	0.00271028	0.303141	-0.300431	-54.714	AT1TE54405	0	CHG	Hyper-methylation
Chr1	16939459	16939544	86	8	0.610178	0.0922568	0.517922	68.0898	AT1TE56120	13	CHG	Hypo-methylation
Chr1	17560853	17560963	111	7	0.353419	0.0034824	0.349937	44.2536	AT1G47720	324	CHG	Hypo-methylation
Chr1	18648957	18649074	118	12	0.34522	0.0150735	0.330146	95.4543	AT1G50350	0	CHG	Hypo-methylation
Chr1	19744049	19744353	305	12	0.0148891	0.487596	-0.472707	-105.37	AT1TE65255	0	CHG	Hyper-methylation
Chr1	19963328	19963822	495	43	0.00910342	0.491708	-0.482605	-452.648	AT1G53480	0	CHG	Hyper-methylation
Chr1	20433983	20434047	65	11	0.00967866	0.433711	-0.424032	-118.221	AT1G54760	0	CHG	Hyper-methylation
Chr1	21341432	21341599	168	5	0.597337	0.227623	0.369714	23.5466	AT1TE70480	0	CHG	Hypo-methylation
Chr1	21341689	21342020	332	20	0.129513	0.525363	-0.395849	-152.316	AT1TE70480	0	CHG	Hyper-methylation
Chr1	21342343	21342402	60	9	0.45421	0.813133	-0.358922	-60.4669	AT1TE70480	0	CHG	Hyper-methylation
Chr1	21681407	21681473	67	5	0.441548	0.0204171	0.421131	41.3765	AT1TE71540	-51	CHG	Hypo-methylation
Chr1	23519554	23519628	75	8	0.0800949	0.443523	-0.363428	-55.6277	AT1TE77440	52	CHG	Hyper-methylation
Chr1	25595681	25595836	156	13	0.00318997	0.431127	-0.427937	-106.474	AT1TE83950	333	CHG	Hyper-methylation
Chr1	28470353	28470668	316	19	0.031487	0.477767	-0.44628	-158.472	AT1G09583	-62	CHG	Hyper-methylation
Chr1	28515303	28515637	335	19	0.420723	0.00956434	0.411159	142.989	AT1TE93275	0	CHG	Hypo-methylation
Chr1	28515737	28516006	270	16	0.414053	0.0185034	0.395549	137.572	AT1TE93275	0	CHG	Hypo-methylation
Chr2	145567	145646	80	5	0.00291757	0.388778	-0.38586	-39.9765	AT2G01280	-31	CHG	Hyper-methylation
Chr2	145770	146086	317	15	0.0104535	0.484429	-0.473976	-123.762	AT2G01280	0	CHG	Hyper-methylation
Chr2	146233	146582	350	30	0.0107685	0.319021	-0.308252	-243.228	AT2G01280	0	CHG	Hyper-methylation
Chr2	1359944	1360061	118	14	0.00374145	0.45023	-0.446489	-156.774	AT2TE06200	0	CHG	Hyper-methylation
Chr2	1968385	1968440	56	6	0.590767	0.0514686	0.539298	53.2095	AT2TE09085	0	CHG	Hypo-methylation
Chr2	2544261	2544315	55	4	0.279671	0.645145	-0.365475	-17.6413	AT2TE11515	0	CHG	Hyper-methylation
Chr2	5121106	5121235	130	6	0.0523529	0.468166	-0.415814	-40.3909	AT2TE21015	14	CHG	Hyper-methylation
Chr2	5636730	5636847	118	15	0.445986	0.129172	0.316814	93.107	AT2G13540	-38	CHG	Hypo-methylation
Chr2	6179098	6179175	78	8	0.335355	0.0402352	0.29512	52.622	AT2TE25100	-577	CHG	Hypo-methylation
Chr2	7632973	7633260	288	11	0.00350771	0.397766	-0.394258	-76.8862	AT2G06995	0	CHG	Hyper-methylation
Chr2	7633372	7633623	252	17	0.00972454	0.353427	-0.343702	-122.175	AT2G06995	0	CHG	Hyper-methylation
Chr2	7696814	7696869	56	6	0.535573	0.0485099	0.487064	51.2106	AT2G17720	-443	CHG	Hypo-methylation
Chr2	8451550	8451603	54	8	0.00281477	0.356616	-0.353801	-66.2341	AT2TE35290	0	CHG	Hyper-methylation
Chr2	9344857	9344919	63	7	0.314359	0.697459	-0.3831	-35.7519	AT2G21920	0	CHG	Hyper-methylation
Chr2	9518339	9518415	77	5	0.0122835	0.781316	-0.769033	-81.9062	AT2G22426	954	CHG	Hyper-methylation
Chr2	9595958	9596011	54	6	0.345261	0.00778908	0.337472	43.8697	AT2TE40895	-131	CHG	Hypo-methylation
Chr2	11346545	11346635	91	12	0.342008	0.00699929	0.335009	98.2381	AT2TE49075	0	CHG	Hypo-methylation
Chr2	11834723	11834779	57	6	0.370576	0.00983725	0.360738	40.9641	AT2TE51470	0	CHG	Hypo-methylation
Chr2	13702468	13702521	54	9	0.75707	0.00334354	0.753727	185.133	AT2TE60325	0	CHG	Hypo-methylation
Chr2	13717300	13717607	308	30	0.0357537	0.44947	-0.413716	-273.149	AT2TE60380	59	CHG	Hyper-methylation
Chr2	14847155	14847212	58	6	0.00311187	0.404588	-0.401476	-41.9876	AT2G35250	0	CHG	Hyper-methylation
Chr2	17407594	17407648	55	7	0.620754	0.0300317	0.590722	86.2632	AT2G41720	-270	CHG	Hypo-methylation
Chr2	19263942	19264014	73	8	0.587984	0.0215887	0.566395	95.2312	AT2G46880	560	CHG	Hypo-methylation
Chr3	2251229	2251503	275	14	0.202337	0.709037	-0.506699	-126.551	AT3TE09475	0	CHG	Hyper-methylation
Chr3	10359708	10359769	62	8	0.134379	0.478336	-0.343957	-47.1619	AT3G27910	-1428	CHG	Hyper-methylation
Chr3	10781968	10782026	59	5	0.506141	0.0911149	0.415026	35.5084	AT3G28720	-70	CHG	Hypo-methylation
Chr3	14761906	14762107	202	7	0.0258424	0.474999	-0.449157	-49.5239	AT3TE60370	67	CHG	Hyper-methylation
Chr3	14812783	14812861	79	9	0.525751	0.0034617	0.522289	102.874	AT3TE60500	43	CHG	Hypo-methylation
Chr3	15777054	15777433	380	19	0.00818561	0.415813	-0.407627	-151.187	AT3G43970	0	CHG	Hyper-methylation
Chr3	16277185	16277267	83	7	0.31076	0.0165305	0.294229	43.8109	AT3TE65960	0	CHG	Hypo-methylation
Chr3	16584649	16584855	207	6	0.540766	0.0249301	0.515836	52.2058	AT3TE67265	24	CHG	Hypo-methylation
Chr3	16754785	16755203	419	13	0.039602	0.554972	-0.51537	-144.731	AT3G45638	13	CHG	Hyper-methylation
Chr3	17978346	17978538	193	5	0.692397	0.0833206	0.609077	45.0327	AT3TE72850	208	CHG	Hypo-methylation
Chr3	18254620	18254849	230	14	0.00388167	0.406284	-0.402402	-108.66	AT3G49230	0	CHG	Hyper-methylation
Chr3	18672161	18672224	64	7	0.555796	0.0364006	0.519396	74.4032	AT3G50350	0	CHG	Hypo-methylation
Chr3	20685807	20685917	111	8	0.0444046	0.511277	-0.466872	-70.846	AT3TE84110	7	CHG	Hyper-methylation
Chr3	20686010	20686141	132	9	0.0182096	0.390465	-0.372255	-62.8196	AT3G08585	0	CHG	Hyper-methylation
Chr3	20686501	20686557	57	6	0.0530612	0.444621	-0.39156	-41.8899	AT3TE84115	-35	CHG	Hyper-methylation
Chr3	20853329	20853428	100	10	0.0472256	0.444331	-0.397105	-87.49	AT3G56210	0	CHG	Hyper-methylation
Chr3	21267560	21267627	68	5	0.117232	0.495708	-0.378476	-24.9468	AT3G08935	0	CHG	Hyper-methylation
Chr3	21277409	21277499	91	7	0.00717217	0.394918	-0.387746	-43.9606	AT3G57480	0	CHG	Hyper-methylation
Chr3	22232644	22232938	295	20	0.459741	0.0730897	0.386652	145.73	AT3TE90530	0	CHG	Hypo-methylation
Chr4	2020189	2020289	101	7	0.0549568	0.450778	-0.395821	-45.1568	AT4G04180	-132	CHG	Hyper-methylation
Chr4	2584630	2584742	113	9	0.0193149	0.342525	-0.323211	-55.4679	AT4TE12105	11	CHG	Hyper-methylation
Chr4	2584854	2585051	198	12	0.02334	0.391393	-0.368053	-85.8277	AT4TE12105	0	CHG	Hyper-methylation
Chr4	2804032	2804096	65	11	0.62247	0.028618	0.593852	164.659	AT4TE13155	10	CHG	Hypo-methylation
Chr4	3991229	3991291	63	4	0.0599839	0.658259	-0.598275	-25.7808	AT4TE17360	0	CHG	Hyper-methylation
Chr4	5987200	5988254	1055	52	0.0114185	0.509802	-0.498383	-528.523	AT4TE25200	0	CHG	Hyper-methylation
Chr4	5988353	5988410	58	13	0.00906831	0.399482	-0.390414	-123.379	AT4TE25200	0	CHG	Hyper-methylation
Chr4	6177967	6178018	52	4	0.003643	0.488617	-0.484974	-24.0057	AT4TE26150	-378	CHG	Hyper-methylation
Chr4	6617789	6617841	53	6	0.156711	0.520048	-0.363337	-33.5194	AT4G10740	0	CHG	Hyper-methylation
Chr4	7444791	7444869	79	11	0.00502501	0.285218	-0.280193	-89.5403	AT4TE32425	192	CHG	Hyper-methylation
Chr4	8087901	8087986	86	5	0.443508	0.01186	0.431648	36.8574	AT4G13992	0	CHG	Hypo-methylation
Chr4	8088074	8088142	69	6	0.598617	0.0530228	0.545594	57.1178	AT4G13992	0	CHG	Hypo-methylation
Chr4	8088639	8088809	171	11	0.505397	0.061351	0.444046	86.8261	AT4G13992	0	CHG	Hypo-methylation
Chr4	9048969	9049044	76	5	0.370671	0.0115732	0.359098	26.5556	AT4TE40590	0	CHG	Hypo-methylation
Chr4	9791605	9791663	59	6	0.753269	0.0237034	0.729566	86.4489	AT4G17580	-461	CHG	Hypo-methylation
Chr4	11375567	11375622	56	7	0.440724	0.0040862	0.436637	66.6125	AT4G21362	87	CHG	Hypo-methylation
Chr4	12768723	12768964	242	6	0.0778054	0.565846	-0.488041	-38.3336	AT4G24770	0	CHG	Hyper-methylation
Chr4	14031509	14031599	91	13	0.487523	0.00740923	0.480114	142.234	AT4TE66290	-96	CHG	Hypo-methylation
Chr4	14979608	14979862	255	29	0.0231839	0.365044	-0.341861	-240.683	AT4G30740	0	CHG	Hyper-methylation
Chr5	1686705	1686903	199	20	0.0326177	0.322993	-0.290375	-152.834	AT5G05650	0	CHG	Hyper-methylation
Chr5	6789369	6789427	59	6	0.0133342	0.600805	-0.58747	-69.0339	AT5G20100	-509	CHG	Hyper-methylation
Chr5	7462475	7462531	57	8	0.00330733	0.41565	-0.412343	-73.922	AT5G03405	0	CHG	Hyper-methylation
Chr5	9048632	9048703	72	8	0.0600982	0.454077	-0.393978	-62.2736	AT5TE32730	0	CHG	Hyper-methylation
Chr5	10350396	10350665	270	18	0.279354	0.666011	-0.386657	-131.652	AT5TE37800	0	CHG	Hyper-methylation
Chr5	11847156	11847235	80	7	0.192773	0.730579	-0.537806	-33.1894	AT5TE42470	0	CHG	Hyper-methylation
Chr5	13759455	13759520	66	4	0.405971	0.0492159	0.356755	22.07	AT5TE48995	111	CHG	Hypo-methylation
Chr5	13834692	13834798	107	18	0.0644296	0.382286	-0.317857	-157.193	AT5G35640	0	CHG	Hyper-methylation
Chr5	15742304	15742377	74	4	0.00339587	0.410615	-0.407219	-29.0649	AT5G39320	-167	CHG	Hyper-methylation
Chr5	18892797	18892847	51	4	0.015255	0.458395	-0.44314	-26.7084	AT5G06855	504	CHG	Hyper-methylation
Chr5	19178967	19179043	77	7	0.00323997	0.438079	-0.434839	-54.9788	AT5TE69000	0	CHG	Hyper-methylation
Chr5	19199044	19199166	123	9	0.0184274	0.354033	-0.335605	-58.348	AT5G47300	0	CHG	Hyper-methylation
Chr5	19830066	19830317	252	41	0.00968386	0.366442	-0.356758	-418.17	AT5G07295	-96	CHG	Hyper-methylation
Chr5	21224415	21224607	193	11	0.0155011	0.579271	-0.56377	-152.193	AT5G52270	-1811	CHG	Hyper-methylation
Chr5	22702393	22702466	74	5	0.434837	0.0123626	0.422474	32.2583	AT5TE81680	0	CHG	Hypo-methylation
Chr1	42289	42435	147	45	0.0214676	0.201754	-0.180286	-364.004	AT1G04003	653	CHH	Hyper-methylation
Chr1	500070	500158	89	20	0.187324	0.42238	-0.235056	-101.807	AT1TE01615	0	CHH	Hyper-methylation
Chr1	1544388	1544496	109	25	0.268653	0.00492848	0.263725	268.259	AT1G04387	296	CHH	Hypo-methylation
Chr1	2531484	2531564	81	27	0.388789	0.222295	0.166494	152.944	AT1TE08240	0	CHH	Hypo-methylation
Chr1	3573060	3573200	141	29	0.210342	0.464201	-0.253859	-207.618	AT1G10745	0	CHH	Hyper-methylation
Chr1	4061505	4061561	57	18	0.397966	0.225163	0.172803	99.0601	AT1G12020	0	CHH	Hypo-methylation
Chr1	4111097	4111184	88	25	0.152696	0.371493	-0.218797	-153.549	AT1TE13370	0	CHH	Hyper-methylation
Chr1	4112921	4112971	51	15	0.58247	0.384423	0.198047	68.3972	AT1TE13375	0	CHH	Hypo-methylation
Chr1	4294086	4294185	100	30	0.00316817	0.221922	-0.218754	-296.049	AT1TE13965	0	CHH	Hyper-methylation
Chr1	4525108	4525195	88	28	0.637799	0.440245	0.197555	140.825	MIR8166	77	CHH	Hypo-methylation
Chr1	6261619	6261700	82	20	0.191086	0.0155589	0.175527	168.156	AT1G18190	-119	CHH	Hypo-methylation
Chr1	6543360	6543425	66	27	0.64599	0.157059	0.488931	248.913	AT1TE21210	0	CHH	Hypo-methylation
Chr1	6593964	6594085	122	30	0.0105217	0.296929	-0.286408	-344.145	AT1TE21370	0	CHH	Hyper-methylation
Chr1	6735903	6735991	89	14	0.351435	0.148463	0.202972	68.2539	AT1TE21790	0	CHH	Hypo-methylation
Chr1	7714860	7714949	90	16	0.665296	0.260157	0.40514	97.6548	AT1TE24850	0	CHH	Hypo-methylation
Chr1	8201287	8201343	57	17	0.128833	0.295888	-0.167055	-94.3231	AT1G23130	42	CHH	Hyper-methylation
Chr1	8276587	8276667	81	28	0.141345	0.320205	-0.17886	-156.404	AT1TE26665	0	CHH	Hyper-methylation
Chr1	8538735	8538800	66	18	0.0443817	0.247535	-0.203153	-141.696	AT1TE27540	0	CHH	Hyper-methylation
Chr1	8728767	8728837	71	14	0.0445889	0.224663	-0.180074	-98.8735	AT1TE28170	-399	CHH	Hyper-methylation
Chr1	9236995	9237076	82	24	0.278254	0.475668	-0.197413	-128.495	AT1TE29770	0	CHH	Hyper-methylation
Chr1	9708096	9708165	70	23	0.619531	0.208258	0.411274	141.052	AT1G27880	-697	CHH	Hypo-methylation
Chr1	9708299	9708394	96	37	0.196215	0.433714	-0.237499	-205.53	AT1G27880	-468	CHH	Hyper-methylation
Chr1	10013418	10013524	107	26	0.0382686	0.273263	-0.234994	-215.068	AT1G28480	0	CHH	Hyper-methylation
Chr1	10144889	10145010	122	29	0.177915	0.398914	-0.220999	-177.398	AT1TE32720	-332	CHH	Hyper-methylation
Chr1	10357330	10357404	75	26	0.485998	0.309041	0.176957	124.784	AT1TE33490	0	CHH	Hypo-methylation
Chr1	10363013	10363364	352	110	0.0166013	0.304794	-0.288193	-1352.13	AT1TE33490	0	CHH	Hyper-methylation
Chr1	11083087	11083200	114	26	0.423674	0.225293	0.198381	144.346	AT1G31070	-1467	CHH	Hypo-methylation
Chr1	11117534	11117587	54	12	0.419661	0.595463	-0.175803	-51.584	AT1G31140	-355	CHH	Hyper-methylation
Chr1	11277023	11277107	85	23	0.48043	0.305321	0.175109	98.9494	AT1G31510	-311	CHH	Hypo-methylation
Chr1	11536967	11537043	77	27	0.398916	0.19544	0.203477	182.484	AT1TE37340	161	CHH	Hypo-methylation
Chr1	11564688	11564800	113	29	0.355419	0.00595426	0.349465	380.83	AT1G32140	0	CHH	Hypo-methylation
Chr1	12738782	12738859	78	15	0.362196	0.176478	0.185718	75.6594	AT1TE41525	0	CHH	Hypo-methylation
Chr1	13017086	13017151	66	11	0.271592	0.0411791	0.230413	68.1947	AT1TE42430	0	CHH	Hypo-methylation
Chr1	13027927	13028073	147	52	0.0666098	0.327352	-0.260742	-477.401	AT1TE42485	0	CHH	Hyper-methylation
Chr1	13057220	13057295	76	20	0.355101	0.184615	0.170486	98.8712	AT1TE42630	0	CHH	Hypo-methylation
Chr1	13058064	13058161	98	25	0.378096	0.147128	0.230968	154.32	AT1TE42630	0	CHH	Hypo-methylation
Chr1	13129976	13130051	76	17	0.407106	0.228703	0.178403	85.1148	AT1TE42885	-209	CHH	Hypo-methylation
Chr1	13151386	13151455	70	15	0.175947	0.352064	-0.176118	-71.9707	AT1TE42925	0	CHH	Hyper-methylation
Chr1	14155050	14155128	79	19	0.236812	0.0477896	0.189023	131.37	AT1G07013	0	CHH	Hypo-methylation
Chr1	15039124	15039211	88	18	0.210535	0.00398938	0.206545	95.3066	AT1TE49260	0	CHH	Hypo-methylation
Chr1	16460074	16460125	52	15	0.155687	0.326013	-0.170327	-86.9669	AT1TE54290	0	CHH	Hyper-methylation
Chr1	17247427	17247551	125	31	0.357316	0.0262742	0.331042	351.229	AT1TE57195	135	CHH	Hypo-methylation
Chr1	17440384	17440452	69	16	0.118432	0.302003	-0.183571	-84.3376	AT1TE57795	-486	CHH	Hyper-methylation
Chr1	17552161	17552215	55	9	0.225348	0.0451147	0.180233	42.9739	AT1TE58195	0	CHH	Hypo-methylation
Chr1	17560819	17560954	136	35	0.48455	0.00111267	0.483437	619.329	AT1G47720	333	CHH	Hypo-methylation
Chr1	17695758	17695865	108	41	0.00788773	0.336741	-0.328853	-568.306	AT1G07457	0	CHH	Hyper-methylation
Chr1	17715326	17715386	61	19	0.323633	0.152142	0.171491	109.058	AT1TE58830	0	CHH	Hypo-methylation
Chr1	18047933	18048026	94	27	0.205268	0.0173726	0.187895	237.544	AT1G48790	-128	CHH	Hypo-methylation
Chr1	18078687	18078739	53	18	0.157663	0.0066698	0.150993	143.798	AT1G07507	-418	CHH	Hypo-methylation
Chr1	18304490	18304553	64	17	0.428893	0.250178	0.178714	83.1898	AT1TE60665	39	CHH	Hypo-methylation
Chr1	19063425	19063511	87	14	0.276	0.0211212	0.254879	96.5461	AT1TE63170	0	CHH	Hypo-methylation
Chr1	19226349	19226429	81	27	0.385515	0.206606	0.178909	160.157	AT1G51805	-553	CHH	Hypo-methylation
Chr1	19303875	19303983	109	37	0.493068	0.249115	0.243953	256.144	AT1TE63980	0	CHH	Hypo-methylation
Chr1	19741879	19741948	70	20	0.310047	0.128882	0.181165	97.7681	AT1G52990	0	CHH	Hypo-methylation
Chr1	19744177	19744376	200	50	0.0157834	0.360971	-0.345187	-672.475	AT1TE65255	0	CHH	Hyper-methylation
Chr1	19861411	19861557	147	45	0.153006	0.412915	-0.259909	-393.345	AT1G53265	0	CHH	Hyper-methylation
Chr1	19995662	19995715	54	14	0.35446	0.106198	0.248262	93.2279	AT1TE66090	0	CHH	Hypo-methylation
Chr1	20914845	20914919	75	21	0.435445	0.233925	0.201521	105.675	AT1TE69075	0	CHH	Hypo-methylation
Chr1	21190969	21191126	158	31	0.342991	0.00577493	0.337216	392.092	AT1G56555	0	CHH	Hypo-methylation
Chr1	21341454	21341625	172	42	0.428093	0.240989	0.187104	214.473	AT1TE70480	0	CHH	Hypo-methylation
Chr1	22224795	22224847	53	18	0.69795	0.521481	0.176469	80.5658	AT1TE73400	0	CHH	Hypo-methylation
Chr1	22261078	22261180	103	31	0.466575	0.262422	0.204154	185.19	AT1G60410	292	CHH	Hypo-methylation
Chr1	22451369	22451434	66	16	0.314008	0.120103	0.193905	80.138	AT1TE74085	0	CHH	Hypo-methylation
Chr1	22830777	22830862	86	18	0.223479	0.0189469	0.204532	139.554	AT1G61810	0	CHH	Hypo-methylation
Chr1	23123273	23123326	54	13	0.331733	0.156677	0.175056	68.9525	AT1TE76215	60	CHH	Hypo-methylation
Chr1	23519521	23519599	79	16	0.110267	0.295535	-0.185268	-98.0235	AT1TE77440	19	CHH	Hyper-methylation
Chr1	23586537	23586639	103	21	0.122061	0.361489	-0.239428	-142.714	AT1TE77670	175	CHH	Hyper-methylation
Chr1	23877101	23877155	55	7	0.0388303	0.288196	-0.249365	-37.7329	AT1TE78560	0	CHH	Hyper-methylation
Chr1	24337939	24338035	97	33	0.295146	0.130719	0.164427	202.911	AT1TE79995	0	CHH	Hypo-methylation
Chr1	24447421	24447483	63	21	0.0296119	0.173673	-0.144062	-149.146	AT1TE80300	0	CHH	Hyper-methylation
Chr1	24761528	24761614	87	18	0.010142	0.222727	-0.212585	-147.783	AT1TE81330	-176	CHH	Hyper-methylation
Chr1	24894197	24894286	90	19	0.575296	0.321679	0.253617	115.023	AT1TE81785	0	CHH	Hypo-methylation
Chr1	24956765	24956832	68	22	0.251028	0.0957074	0.155321	132.053	AT1TE81980	129	CHH	Hypo-methylation
Chr1	25609876	25609997	122	22	0.513816	0.290693	0.223123	114.888	AT1G68325	-472	CHH	Hypo-methylation
Chr1	25641647	25641698	52	14	0.340375	0.575755	-0.235381	-59.433	AT1TE84070	0	CHH	Hyper-methylation
Chr1	26196998	26197089	92	20	0.129509	0.399598	-0.270088	-93.7609	AT1G69650	410	CHH	Hyper-methylation
Chr1	26380885	26380974	90	24	0.00353272	0.194412	-0.190879	-166.734	AT1TE86390	0	CHH	Hyper-methylation
Chr1	26395100	26395202	103	19	0.00381509	0.232089	-0.228274	-174.37	AT1G70080	0	CHH	Hyper-methylation
Chr1	26551566	26551644	79	27	0.332096	0.502354	-0.170258	-139.021	AT1TE86940	0	CHH	Hyper-methylation
Chr1	26953148	26953204	57	20	0.177921	0.00795251	0.169968	171.143	AT1G71692	0	CHH	Hypo-methylation
Chr1	28105579	28105629	51	15	0.352497	0.570056	-0.217559	-72.2657	AT1G74800	-387	CHH	Hyper-methylation
Chr1	28397507	28397584	78	19	0.305786	0.502869	-0.197082	-101.648	AT1TE92900	0	CHH	Hyper-methylation
Chr1	28470256	28470419	164	50	0.0126058	0.272664	-0.260058	-597.142	AT1G09583	0	CHH	Hyper-methylation
Chr1	28912962	28913115	154	28	0.21582	0.0366083	0.179212	149.834	AT1TE94570	0	CHH	Hypo-methylation
Chr1	29474836	29474894	59	7	0.0760051	0.293993	-0.217988	-44.9127	AT1TE96425	0	CHH	Hyper-methylation
Chr1	29775030	29775121	92	24	0.260122	0.451404	-0.191282	-124.061	AT1G79150	0	CHH	Hyper-methylation
Chr1	30251278	30251365	88	21	0.183644	0.408021	-0.224376	-125.037	AT1TE98910	0	CHH	Hyper-methylation
Chr2	204574	204660	87	16	0.397588	0.193603	0.203986	82.069	AT2TE00795	0	CHH	Hypo-methylation
Chr2	473919	473986	68	20	0.244647	0.0733959	0.171251	132.072	AT2G02010	123	CHH	Hypo-methylation
Chr2	856944	857060	117	24	0.0051883	0.35173	-0.346542	-294.736	AT2G02950	-220	CHH	Hyper-methylation
Chr2	1889997	1890081	85	28	0.320403	0.12775	0.192653	172.025	AT2TE08690	0	CHH	Hypo-methylation
Chr2	1968259	1968471	213	80	0.324626	0.019318	0.305308	1067.25	AT2TE09085	0	CHH	Hypo-methylation
Chr2	1987729	1987802	74	23	0.142398	0.307392	-0.164993	-127.962	AT2TE09170	0	CHH	Hyper-methylation
Chr2	2065383	2065453	71	18	0.188223	0.00287847	0.185345	116.504	AT2TE09430	0	CHH	Hypo-methylation
Chr2	2148386	2148470	85	21	0.0388646	0.256836	-0.217972	-164.188	AT2G05720	172	CHH	Hyper-methylation
Chr2	2218818	2218891	74	22	0.358805	0.182678	0.176127	112.926	AT2TE10245	0	CHH	Hypo-methylation
Chr2	4650370	4650469	100	41	0.448178	0.0441795	0.403999	430.697	AT2TE19310	0	CHH	Hypo-methylation
Chr2	5053668	5053761	94	26	0.411621	0.148033	0.263588	197.422	AT2TE20770	0	CHH	Hypo-methylation
Chr2	5111859	5111934	76	21	0.33115	0.142071	0.189079	123.311	AT2TE20970	0	CHH	Hypo-methylation
Chr2	5120580	5120666	87	20	0.257804	0.072802	0.185002	96.3784	AT2TE21010	0	CHH	Hypo-methylation
Chr2	5566698	5567000	303	11	0.301001	0.0466448	0.254356	58.4751	AT2TE22505	0	CHH	Hypo-methylation
Chr2	5588989	5589048	60	11	0.113539	0.396327	-0.282787	-49.5127	AT2TE22565	-53	CHH	Hyper-methylation
Chr2	5598504	5598617	114	35	0.259037	0.0671594	0.191877	272.448	AT2G13450	0	CHH	Hypo-methylation
Chr2	5636801	5636967	167	43	0.514402	0.0528586	0.461544	686.799	AT2G13540	0	CHH	Hypo-methylation
Chr2	6179310	6179530	221	51	0.236957	0.010008	0.226949	458.05	AT2TE25100	-222	CHH	Hypo-methylation
Chr2	6263650	6263766	117	9	0.0849219	0.322467	-0.237545	-45.7452	AT2TE25540	0	CHH	Hyper-methylation
Chr2	6269797	6269851	55	18	0.0961225	0.272745	-0.176623	-97.4826	AT2TE25540	0	CHH	Hyper-methylation
Chr2	6460600	6460658	59	5	0.00223032	0.318713	-0.316483	-34.5971	AT2TE26380	0	CHH	Hyper-methylation
Chr2	6677577	6677662	86	36	0.167525	0.0160463	0.151478	311.052	AT2G15340	0	CHH	Hypo-methylation
Chr2	7278590	7278675	86	23	0.363515	0.157804	0.20571	133.676	AT2TE29680	0	CHH	Hypo-methylation
Chr2	7420812	7420869	58	16	0.0866205	0.252678	-0.166058	-96.2072	AT2TE30430	0	CHH	Hyper-methylation
Chr2	7632695	7632846	152	38	0.0272141	0.230219	-0.203005	-269.85	AT2TE31430	170	CHH	Hyper-methylation
Chr2	7633125	7633200	76	22	0.0100659	0.154498	-0.144432	-166.69	AT2G06995	-15	CHH	Hyper-methylation
Chr2	7633478	7633629	152	50	0.00698287	0.320135	-0.313152	-665.573	AT2G06995	0	CHH	Hyper-methylation
Chr2	9021941	9022018	78	27	0.284516	0.10687	0.177646	184.265	AT2TE38080	0	CHH	Hypo-methylation
Chr2	9344646	9344787	142	42	0.0736166	0.40803	-0.334413	-500.944	AT2G21920	0	CHH	Hyper-methylation
Chr2	9432117	9432214	98	25	0.321722	0.0548603	0.266862	236.913	AT2G07545	8	CHH	Hypo-methylation
Chr2	9518285	9518405	121	22	0.00414201	0.329398	-0.325256	-237.621	AT2G22426	900	CHH	Hyper-methylation
Chr2	9656537	9656632	96	20	0.371534	0.133242	0.238293	116.47	AT2TE41185	0	CHH	Hypo-methylation
Chr2	9947372	9947477	106	27	0.201402	0.0117624	0.18964	231.842	AT2TE42545	-51	CHH	Hypo-methylation
Chr2	11052268	11052321	54	17	0.0350633	0.203854	-0.168791	-110.775	AT2TE47640	0	CHH	Hyper-methylation
Chr2	11346479	11346580	102	22	0.247814	0.0133107	0.234503	204.251	AT2TE49070	0	CHH	Hypo-methylation
Chr2	11663926	11663989	64	15	0.349592	0.141806	0.207786	83.8628	AT2TE50665	0	CHH	Hypo-methylation
Chr2	11721866	11721993	128	35	0.401259	0.231563	0.169696	176.668	AT2G27400	0	CHH	Hypo-methylation
Chr2	11834698	11834770	73	16	0.15754	0.00106906	0.156471	113.656	AT2TE51470	0	CHH	Hypo-methylation
Chr2	11834902	11834957	56	14	0.231567	0.001237	0.23033	118.703	AT2TE51475	0	CHH	Hypo-methylation
Chr2	12622871	12622990	120	35	0.332113	0.148596	0.183518	230.725	AT2TE55130	0	CHH	Hypo-methylation
Chr2	12725426	12725511	86	27	0.558981	0.379244	0.179737	125.122	AT2TE55625	0	CHH	Hypo-methylation
Chr2	13094964	13095131	168	36	0.141468	0.410472	-0.269004	-265.01	AT2TE57390	0	CHH	Hyper-methylation
Chr2	13101797	13101887	91	21	0.291486	0.481253	-0.189767	-82.303	AT2TE57420	0	CHH	Hyper-methylation
Chr2	13404440	13404511	72	25	0.74579	0.569348	0.176443	125.394	AT2TE58860	0	CHH	Hypo-methylation
Chr2	13702426	13702545	120	19	0.28682	0.00191956	0.284901	188.701	AT2TE60325	0	CHH	Hypo-methylation
Chr2	13885982	13886061	80	7	0.253125	0.474915	-0.221789	-24.8727	AT2TE61215	0	CHH	Hyper-methylation
Chr2	13886209	13886267	59	7	0.427183	0.20925	0.217933	30.839	AT2TE61215	0	CHH	Hypo-methylation
Chr2	14386679	14386882	204	53	0.0182756	0.255849	-0.237573	-506.822	AT2G34060	0	CHH	Hyper-methylation
Chr2	15140115	15140204	90	32	0.0216346	0.196802	-0.175168	-289.704	AT2TE67390	2414	CHH	Hyper-methylation
Chr2	15381929	15382015	87	24	0.196179	0.00679699	0.189382	220.959	AT2G36690	0	CHH	Hypo-methylation
Chr2	16082721	16082812	92	27	0.18233	0.00443883	0.177891	260.207	AT2G38400	-834	CHH	Hypo-methylation
Chr2	16272632	16272714	83	19	0.186607	0.0294005	0.157206	135.369	AT2TE72995	-297	CHH	Hypo-methylation
Chr2	16273021	16273071	51	16	0.0359289	0.174141	-0.138212	-108.825	AT2TE72995	-686	CHH	Hyper-methylation
Chr2	17147352	17147408	57	10	0.309978	0.0993399	0.210638	48.3741	AT2TE77260	0	CHH	Hypo-methylation
Chr2	17190205	17190295	91	19	0.0130661	0.262005	-0.248939	-173.039	AT2TE77480	0	CHH	Hyper-methylation
Chr2	17615327	17615459	133	27	0.284014	0.00496972	0.279044	272.983	AT2G09360	-385	CHH	Hypo-methylation
Chr2	17788475	17788566	92	24	0.0220455	0.182225	-0.16018	-184.919	AT2G42725	-145	CHH	Hyper-methylation
Chr2	19263873	19263999	127	29	0.32508	0.012829	0.312251	321.488	AT2G46880	575	CHH	Hypo-methylation
Chr2	19683473	19683586	114	28	0.0392962	0.22399	-0.184694	-208.938	AT2G48130	0	CHH	Hyper-methylation
Chr3	451701	451795	95	24	0.0809057	0.2859	-0.204995	-192.414	AT3G01125	674	CHH	Hyper-methylation
Chr3	538902	538964	63	10	0.473112	0.268459	0.204653	51.394	AT3TE02290	0	CHH	Hypo-methylation
Chr3	986248	986349	102	5	0.253778	0.0141284	0.23965	24.2986	AT3TE04155	0	CHH	Hypo-methylation
Chr3	1057914	1057983	70	17	0.231523	0.480188	-0.248665	-107.606	AT3TE04445	0	CHH	Hyper-methylation
Chr3	1165946	1166105	160	34	0.00763211	0.288387	-0.280755	-350.717	AT3G04390	-182	CHH	Hyper-methylation
Chr3	1166673	1166741	69	24	0.306372	0.11959	0.186781	152.65	AT3G04400	-510	CHH	Hypo-methylation
Chr3	2251364	2251457	94	30	0.0229831	0.20031	-0.177327	-258.663	AT3TE09475	-99	CHH	Hyper-methylation
Chr3	3063456	3063576	121	25	0.00475631	0.284839	-0.280083	-265.11	AT3G09960	0	CHH	Hyper-methylation
Chr3	4745733	4745787	55	22	0.455916	0.284104	0.171812	106.463	AT3G14250	140	CHH	Hypo-methylation
Chr3	6624435	6624489	55	17	0.17896	0.0340021	0.144958	96.0138	AT3TE27825	0	CHH	Hypo-methylation
Chr3	6827599	6827754	156	41	0.498547	0.0107761	0.487771	773.973	AT3G19670	233	CHH	Hypo-methylation
Chr3	6978192	6978251	60	9	0.301813	0.107535	0.194279	49.0159	AT3TE29300	0	CHH	Hypo-methylation
Chr3	6988740	6988855	116	41	0.248581	0.0134005	0.235181	438.944	AT3G03945	0	CHH	Hypo-methylation
Chr3	7679703	7679786	84	27	0.143294	0.329543	-0.186249	-175.46	AT3G21800	321	CHH	Hyper-methylation
Chr3	8138660	8138813	154	41	0.315476	0.00423607	0.31124	514.931	AT3TE34145	0	CHH	Hypo-methylation
Chr3	8547874	8547993	120	37	0.366293	0.0953318	0.270961	341.635	AT3G23730	-2045	CHH	Hypo-methylation
Chr3	8685063	8685120	58	11	0.256965	0.0743935	0.182571	57.1139	AT3TE36400	0	CHH	Hypo-methylation
Chr3	8883631	8883681	51	13	0.426604	0.211121	0.215483	84.2639	AT3TE37155	0	CHH	Hypo-methylation
Chr3	9149023	9149088	66	15	0.0696808	0.256917	-0.187237	-97.6467	AT3G25120	441	CHH	Hyper-methylation
Chr3	9422432	9422509	78	15	0.22213	0.00422809	0.217902	126.397	AT3G25800	0	CHH	Hypo-methylation
Chr3	9646384	9646448	65	15	0.160122	0.00656996	0.153552	107.802	AT3TE40225	119	CHH	Hypo-methylation
Chr3	9699103	9699242	140	30	0.469944	0.156055	0.313888	272.872	AT3TE40435	0	CHH	Hypo-methylation
Chr3	9773949	9774029	81	30	0.180993	0.0158868	0.165106	269.926	AT3TE40690	0	CHH	Hypo-methylation
Chr3	9783819	9783905	87	25	0.0459618	0.332748	-0.286786	-245.819	AT3TE40725	-93	CHH	Hyper-methylation
Chr3	9828971	9829142	172	20	0.242214	0.0637174	0.178496	101.834	AT3TE40900	0	CHH	Hypo-methylation
Chr3	10044880	10044930	51	12	0.460121	0.275501	0.18462	52.1713	AT3G27210	245	CHH	Hypo-methylation
Chr3	10177458	10177524	67	15	0.171108	0.380406	-0.209298	-95.491	AT3TE42300	0	CHH	Hyper-methylation
Chr3	10220280	10220391	112	19	0.367793	0.112091	0.255702	131.23	AT3G27590	0	CHH	Hypo-methylation
Chr3	10293284	10293344	61	16	0.327551	0.513706	-0.186155	-78.6628	AT3TE42790	0	CHH	Hyper-methylation
Chr3	10294637	10294709	73	16	0.226716	0.0176929	0.209023	108.841	AT3TE42795	0	CHH	Hypo-methylation
Chr3	10509550	10509641	92	23	0.405011	0.193915	0.211097	121.738	AT3TE43660	0	CHH	Hypo-methylation
Chr3	10517831	10517903	73	6	0.329022	0.505082	-0.17606	-25.2985	AT3TE43690	0	CHH	Hyper-methylation
Chr3	10599329	10599447	119	30	0.319102	0.0662312	0.25287	257.461	AT3G28345	-288	CHH	Hypo-methylation
Chr3	10781995	10782072	78	18	0.269479	0.0825307	0.186949	98.3	AT3G28720	-24	CHH	Hypo-methylation
Chr3	10901474	10901534	61	16	0.0748922	0.244326	-0.169434	-86.9409	AT3TE45325	0	CHH	Hyper-methylation
Chr3	10938135	10938233	99	17	0.66654	0.329348	0.337192	86.9226	AT3TE45485	-304	CHH	Hypo-methylation
Chr3	11021907	11021962	56	18	0.245791	0.430808	-0.185017	-88.787	AT3TE45810	0	CHH	Hyper-methylation
Chr3	11054157	11054245	89	21	0.332915	0.123136	0.209779	118.214	AT3TE45970	0	CHH	Hypo-methylation
Chr3	11246525	11246582	58	17	0.231813	0.0884598	0.143354	92.4813	AT3TE46870	0	CHH	Hypo-methylation
Chr3	11270368	11270480	113	34	0.349528	0.149009	0.200519	218.63	AT3G29360	-1013	CHH	Hypo-methylation
Chr3	11537104	11537194	91	27	0.280589	0.0518919	0.228697	193.063	AT3TE48060	0	CHH	Hypo-methylation
Chr3	12015028	12015081	54	14	0.286676	0.093568	0.193108	77.1111	AT3TE50075	-123	CHH	Hypo-methylation
Chr3	12142517	12142611	95	27	0.34227	0.171625	0.170645	146.491	AT3TE50480	0	CHH	Hypo-methylation
Chr3	12242937	12243021	85	30	0.0232494	0.237957	-0.214707	-208.073	AT3TE50735	0	CHH	Hyper-methylation
Chr3	12660955	12661024	70	18	0.228116	0.0587976	0.169318	112.78	AT3TE52090	0	CHH	Hypo-methylation
Chr3	13348895	13348951	57	7	0.0207485	0.296248	-0.2755	-22.8329	AT3TE54510	0	CHH	Hyper-methylation
Chr3	13863677	13863728	52	12	0.0310727	0.263869	-0.232796	-48.2612	AT3TE56980	82	CHH	Hyper-methylation
Chr3	14307194	14307284	91	21	0.0606	0.25416	-0.19356	-141.073	AT3TE58780	0	CHH	Hyper-methylation
Chr3	14761598	14761943	346	83	0.0198443	0.237841	-0.217997	-749.664	AT3TE60370	231	CHH	Hyper-methylation
Chr3	14961381	14961592	212	12	0.257763	0.0168894	0.240874	55.3974	AT3TE61000	0	CHH	Hypo-methylation
Chr3	15225397	15225462	66	18	0.534252	0.358954	0.175298	86.031	AT3G43270	0	CHH	Hypo-methylation
Chr3	15638947	15639002	56	14	0.203331	0.0271157	0.176216	90.599	AT3TE63215	0	CHH	Hypo-methylation
Chr3	15749787	15749868	82	28	0.139344	0.344745	-0.205401	-185.353	AT3TE63670	0	CHH	Hyper-methylation
Chr3	15780289	15780476	188	31	0.548971	0.258613	0.290358	209.587	AT3TE63805	0	CHH	Hypo-methylation
Chr3	15780584	15780778	195	59	0.0471751	0.37722	-0.330045	-731.904	AT3TE63805	0	CHH	Hyper-methylation
Chr3	15912273	15912352	80	27	0.0016131	0.16943	-0.167817	-240.845	AT3TE64390	0	CHH	Hyper-methylation
Chr3	16584257	16584362	106	34	0.25012	0.00981407	0.240306	367.119	AT3TE67260	110	CHH	Hypo-methylation
Chr3	16682726	16682793	68	35	0.111974	0.325834	-0.21386	-226.562	AT3G45480	412	CHH	Hyper-methylation
Chr3	16840498	16840571	74	22	0.451244	0.275521	0.175722	102.193	AT3G45820	0	CHH	Hypo-methylation
Chr3	17143727	17143779	53	11	0.270146	0.0378691	0.232277	71.8057	AT3TE69475	0	CHH	Hypo-methylation
Chr3	17580406	17580484	79	25	0.46068	0.280922	0.179758	125.285	AT3TE71215	-166	CHH	Hypo-methylation
Chr3	17978266	17978530	265	61	0.29976	0.02744	0.27232	622.326	AT3G07985	169	CHH	Hypo-methylation
Chr3	18254614	18254713	100	22	0.00542268	0.193546	-0.188124	-179.988	AT3G49230	0	CHH	Hyper-methylation
Chr3	18255091	18255154	64	24	0.263786	0.072394	0.191392	184.079	AT3G49230	0	CHH	Hypo-methylation
Chr3	18672166	18672265	100	27	0.263558	0.0189604	0.244598	277.022	AT3G50350	0	CHH	Hypo-methylation
Chr3	18831697	18831801	105	23	0.0187643	0.199739	-0.180975	-146.911	AT3TE76355	0	CHH	Hyper-methylation
Chr3	18873703	18873779	77	20	0.560877	0.756985	-0.196108	-106.962	AT3TE76530	0	CHH	Hyper-methylation
Chr3	19219281	19219341	61	10	0.0720618	0.246208	-0.174146	-54.7074	AT3TE77985	0	CHH	Hyper-methylation
Chr3	19291209	19291282	74	20	0.154971	0.374102	-0.21913	-122.496	AT3TE78275	227	CHH	Hyper-methylation
Chr3	19533929	19534013	85	25	0.187873	0.399166	-0.211293	-155.482	AT3G52700	0	CHH	Hyper-methylation
Chr3	20277034	20277105	72	14	0.186999	0.37385	-0.186851	-70.7448	AT3TE82430	0	CHH	Hyper-methylation
Chr3	21267541	21267633	93	29	0.0124866	0.200845	-0.188358	-262.965	AT3G08935	0	CHH	Hyper-methylation
Chr3	21277302	21277431	130	44	0.00405704	0.350546	-0.346489	-633.005	AT3G57480	0	CHH	Hyper-methylation
Chr3	21509488	21509569	82	18	0.172414	0.0077336	0.16468	145.733	AT3G58070	-1750	CHH	Hypo-methylation
Chr3	21694172	21694263	92	26	0.465998	0.649348	-0.183349	-113.752	AT3TE88345	0	CHH	Hyper-methylation
Chr3	21694390	21694452	63	18	0.129144	0.303393	-0.174248	-94.8139	AT3TE88345	0	CHH	Hyper-methylation
Chr3	22232706	22232757	52	15	0.150048	0.016022	0.134026	99.731	AT3TE90530	0	CHH	Hypo-methylation
Chr4	77204	77295	92	26	0.13827	0.321257	-0.182987	-149.896	AT4G03525	516	CHH	Hyper-methylation
Chr4	370780	370836	57	7	0.3008	0.0892807	0.211519	36.735	AT4TE01930	0	CHH	Hypo-methylation
Chr4	697463	697515	53	24	0.345224	0.503883	-0.158659	-107.387	AT4TE03590	0	CHH	Hyper-methylation
Chr4	792315	792423	109	23	0.228772	0.0522319	0.17654	132.358	AT4TE04080	0	CHH	Hypo-methylation
Chr4	1064004	1064103	100	30	0.280697	0.464612	-0.183915	-155.924	AT4G02420	12	CHH	Hyper-methylation
Chr4	1091761	1091819	59	20	0.577522	0.262104	0.315418	134.88	AT4TE05550	0	CHH	Hypo-methylation
Chr4	1281583	1281646	64	19	0.223265	0.0488485	0.174416	125.121	AT4TE06555	0	CHH	Hypo-methylation
Chr4	1365980	1366051	72	19	0.489059	0.724129	-0.23507	-110.875	AT4TE06950	0	CHH	Hyper-methylation
Chr4	1438237	1438306	70	20	0.306625	0.134102	0.172523	111.05	AT4G03280	-1841	CHH	Hypo-methylation
Chr4	1462617	1462677	61	5	0.210683	0.0119386	0.198744	18.0877	AT4TE07440	0	CHH	Hypo-methylation
Chr4	2020230	2020306	77	20	0.028698	0.304091	-0.275393	-183.723	AT4G04180	-115	CHH	Hyper-methylation
Chr4	2180356	2180422	67	22	0.351103	0.161637	0.189466	123.546	AT4TE10280	0	CHH	Hypo-methylation
Chr4	2235175	2235240	66	17	0.125339	0.307346	-0.182006	-83.8886	AT4TE10450	0	CHH	Hyper-methylation
Chr4	2735738	2735816	79	17	0.409546	0.19952	0.210026	88.2177	AT4TE12760	-14	CHH	Hypo-methylation
Chr4	2804058	2804119	62	14	0.170969	0.00205883	0.16891	100.569	AT4TE13155	36	CHH	Hypo-methylation
Chr4	4340186	4340284	99	23	0.3522	0.16927	0.18293	104.788	AT4TE18470	0	CHH	Hypo-methylation
Chr4	4547984	4548043	60	20	0.302647	0.0584935	0.244154	127.306	AT4TE19110	0	CHH	Hypo-methylation
Chr4	4959509	4959562	54	6	0.376373	0.072949	0.303424	22.6613	AT4TE20745	0	CHH	Hypo-methylation
Chr4	5083610	5083673	64	16	0.460979	0.232708	0.228271	87.3281	AT4TE21110	21	CHH	Hypo-methylation
Chr4	5317793	5317890	98	23	0.497396	0.297619	0.199777	120.475	AT4G08390	0	CHH	Hypo-methylation
Chr4	5630070	5630154	85	26	0.364461	0.175867	0.188594	140.379	AT4TE23585	0	CHH	Hypo-methylation
Chr4	5635082	5635146	65	24	0.135352	0.00108343	0.134268	197.294	AT4G05605	0	CHH	Hypo-methylation
Chr4	5681937	5681987	51	10	0.0277215	0.214185	-0.186463	-52.6327	AT4TE23815	0	CHH	Hyper-methylation
Chr4	5697746	5697820	75	22	0.231112	0.387016	-0.155904	-101.713	AT4TE23825	0	CHH	Hyper-methylation
Chr4	5910614	5910665	52	19	0.31374	0.132506	0.181234	104.556	AT4TE24895	0	CHH	Hypo-methylation
Chr4	5987190	5987361	172	36	0.031316	0.333758	-0.302442	-396.111	AT4TE25200	0	CHH	Hyper-methylation
Chr4	5987795	5987941	147	38	0.0023285	0.159878	-0.157549	-263.395	AT4TE25200	0	CHH	Hyper-methylation
Chr4	6110311	6110378	68	17	0.0903601	0.260861	-0.1705	-93.979	AT4TE25785	0	CHH	Hyper-methylation
Chr4	6177879	6178015	137	36	0.0166929	0.328398	-0.311705	-426.883	AT4TE26150	-381	CHH	Hyper-methylation
Chr4	6647337	6647400	64	20	0.547803	0.363474	0.184329	98.3325	AT4TE28490	-83	CHH	Hypo-methylation
Chr4	6877388	6877477	90	15	0.00623996	0.253017	-0.246777	-137.823	AT4TE29625	-561	CHH	Hyper-methylation
Chr4	6935028	6935088	61	18	0.352622	0.123553	0.229069	85.018	AT4TE29915	183	CHH	Hypo-methylation
Chr4	7139765	7139866	102	27	0.404559	0.582952	-0.178393	-125.688	AT4G11870	494	CHH	Hyper-methylation
Chr4	7154777	7154869	93	23	0.554675	0.320963	0.233712	122.013	AT4TE31080	0	CHH	Hypo-methylation
Chr4	7444780	7444862	83	24	0.00291513	0.173752	-0.170837	-220.709	AT4TE32425	181	CHH	Hyper-methylation
Chr4	7564284	7564380	97	19	0.275857	0.0691906	0.206667	106.829	AT4TE33025	0	CHH	Hypo-methylation
Chr4	7827889	7827995	107	22	0.348992	0.0970583	0.251934	163.92	AT4TE34340	0	CHH	Hypo-methylation
Chr4	8207971	8208077	107	26	0.24887	0.0212762	0.227594	219.062	AT4G14240	-489	CHH	Hypo-methylation
Chr4	8443261	8443318	58	10	0.32528	0.143571	0.181708	47.3374	AT4TE37475	0	CHH	Hypo-methylation
Chr4	8899108	8899163	56	16	0.372375	0.197174	0.175201	81.5876	AT4TE39800	0	CHH	Hypo-methylation
Chr4	8959557	8959614	58	17	0.255576	0.0850612	0.170515	92.7771	AT4TE40115	-10	CHH	Hypo-methylation
Chr4	9048966	9049070	105	26	0.346793	0.0132103	0.333583	306.227	AT4TE40590	0	CHH	Hypo-methylation
Chr4	9188851	9188963	113	22	0.184525	0.386622	-0.202097	-99.9454	AT4TE41290	0	CHH	Hyper-methylation
Chr4	9737711	9737786	76	27	0.416811	0.238946	0.177865	138.998	AT4TE44080	0	CHH	Hypo-methylation
Chr4	9791550	9791694	145	33	0.375711	0.0144399	0.361271	383.51	AT4G17580	-406	CHH	Hypo-methylation
Chr4	11235900	11236004	105	25	0.509034	0.282859	0.226175	132.276	AT4G21040	-396	CHH	Hypo-methylation
Chr4	11255725	11255864	140	31	0.513053	0.298532	0.214521	169.306	AT4G21080	-375	CHH	Hypo-methylation
Chr4	11375540	11375602	63	13	0.17625	0.00338602	0.172864	94.534	AT4G21362	60	CHH	Hypo-methylation
Chr4	11415851	11415944	94	25	0.558645	0.36979	0.188855	121.376	AT4G21440	2256	CHH	Hypo-methylation
Chr4	15160779	15160833	55	15	0.298929	0.106748	0.192181	91.1761	AT4G31196	-341	CHH	Hypo-methylation
Chr4	15160900	15160964	65	18	0.00991338	0.184519	-0.174605	-143.965	AT4G31196	-210	CHH	Hyper-methylation
Chr4	15816611	15816684	74	27	0.226085	0.393518	-0.167433	-154.163	AT4G03335	0	CHH	Hyper-methylation
Chr4	17404419	17404479	61	14	0.191206	0.411825	-0.220618	-76.0089	AT4G36925	0	CHH	Hyper-methylation
Chr4	17511630	17511681	52	8	0.143933	0.328048	-0.184115	-37.2112	AT4TE84530	0	CHH	Hyper-methylation
Chr4	17625014	17625123	110	26	0.0581279	0.289951	-0.231824	-207.479	AT4G37500	-266	CHH	Hyper-methylation
Chr5	951573	951680	108	24	0.00363372	0.263813	-0.260179	-220.556	AT5G03670	1335	CHH	Hyper-methylation
Chr5	2348330	2348383	54	10	0.340372	0.160144	0.180229	48.0525	AT5TE08535	0	CHH	Hypo-methylation
Chr5	4076743	4076809	67	19	0.528757	0.333899	0.194858	85.2076	AT5G12910	-354	CHH	Hypo-methylation
Chr5	4529607	4529657	51	11	0.454525	0.267189	0.187336	48.0262	AT5G14030	0	CHH	Hypo-methylation
Chr5	4561250	4561345	96	25	0.458469	0.234681	0.223789	161.373	AT5TE16500	0	CHH	Hypo-methylation
Chr5	5062594	5062657	64	16	0.0784498	0.251422	-0.172972	-87.1675	AT5TE18290	0	CHH	Hyper-methylation
Chr5	5128717	5128861	145	30	0.43051	0.188944	0.241566	161.019	AT5TE18530	0	CHH	Hypo-methylation
Chr5	5644078	5644151	74	27	0.342354	0.172326	0.170028	142.538	AT5G17165	0	CHH	Hypo-methylation
Chr5	5907377	5907455	79	22	0.228957	0.47946	-0.250503	-144.34	AT5G17870	-135	CHH	Hyper-methylation
Chr5	6117965	6118019	55	13	0.318194	0.143176	0.175018	59.3042	AT5TE22165	0	CHH	Hypo-methylation
Chr5	6789364	6789495	132	30	0.00301609	0.346172	-0.343156	-382.449	AT5G20100	-441	CHH	Hyper-methylation
Chr5	8155978	8156046	69	20	0.026851	0.193353	-0.166502	-151.152	AT5TE29520	0	CHH	Hyper-methylation
Chr5	8206812	8206866	55	22	0.258796	0.422223	-0.163426	-105.617	AT5TE29680	0	CHH	Hyper-methylation
Chr5	8224546	8224625	80	22	0.175894	0.335485	-0.159591	-118.189	AT5TE29730	-76	CHH	Hyper-methylation
Chr5	8446976	8447032	57	7	0.126291	0.342974	-0.216683	-34.3282	AT5TE30560	0	CHH	Hyper-methylation
Chr5	8701738	8701834	97	41	0.568826	0.357428	0.211398	240.655	AT5TE31470	0	CHH	Hypo-methylation
Chr5	9068297	9068355	59	14	0.239334	0.434052	-0.194717	-68.4546	AT5G25970	0	CHH	Hyper-methylation
Chr5	9115225	9115295	71	17	0.0552971	0.232932	-0.177635	-112.939	AT5TE32955	0	CHH	Hyper-methylation
Chr5	9888923	9888973	51	21	0.339164	0.162231	0.176933	116.044	AT5TE36030	0	CHH	Hypo-methylation
Chr5	10214520	10214583	64	21	0.678614	0.507536	0.171078	107.494	AT5G28237	-923	CHH	Hypo-methylation
Chr5	10291897	10291954	58	21	0.373149	0.199139	0.174009	116.896	AT5TE37600	0	CHH	Hypo-methylation
Chr5	10350394	10350503	110	28	0.0322401	0.245573	-0.213333	-210.452	AT5TE37800	0	CHH	Hyper-methylation
Chr5	10772110	10772161	52	10	0.218745	0.0333179	0.185427	44.4404	AT5TE39170	0	CHH	Hypo-methylation
Chr5	10893108	10893161	54	19	0.206808	0.0616456	0.145163	134.292	AT5TE39580	-56	CHH	Hypo-methylation
Chr5	11185701	11185783	83	13	0.32678	0.0264997	0.30028	68.9786	AT5TE40480	57	CHH	Hypo-methylation
Chr5	13620901	13620997	97	17	0.218874	0.0435084	0.175366	114.438	AT5TE48415	0	CHH	Hypo-methylation
Chr5	13893390	13893484	95	22	0.25856	0.0253755	0.233185	193.563	AT5TE49515	0	CHH	Hypo-methylation
Chr5	15043161	15043239	79	11	0.296171	0.0463699	0.249801	56.0926	AT5TE54320	0	CHH	Hypo-methylation
Chr5	15205566	15205642	77	25	0.285423	0.0599493	0.225474	193.251	AT5TE55020	0	CHH	Hypo-methylation
Chr5	15226675	15226767	93	20	0.126439	0.351668	-0.225229	-126.781	AT5TE55090	0	CHH	Hyper-methylation
Chr5	15577187	15577258	72	13	0.304249	0.118932	0.185317	67.3279	AT5TE56315	0	CHH	Hypo-methylation
Chr5	15742179	15742428	250	60	0.00721423	0.329845	-0.32263	-795.478	AT5G39320	-116	CHH	Hyper-methylation
Chr5	15841015	15841092	78	17	0.385454	0.179211	0.206243	102.068	AT5G39550	-338	CHH	Hypo-methylation
Chr5	15949445	15949529	85	17	0.287646	0.0811535	0.206492	113.832	AT5TE57585	0	CHH	Hypo-methylation
Chr5	16149474	16149573	100	30	0.184435	0.00181468	0.182621	249.822	AT5TE58360	0	CHH	Hypo-methylation
Chr5	16211490	16211555	66	16	0.325023	0.128871	0.196152	98.0524	AT5TE58590	0	CHH	Hypo-methylation
Chr5	16309986	16310115	130	40	0.0913062	0.363098	-0.271792	-341.275	AT5G40750	168	CHH	Hyper-methylation
Chr5	16601033	16601085	53	19	0.0602522	0.203737	-0.143484	-130.061	AT5G41490	0	CHH	Hyper-methylation
Chr5	16681313	16681381	69	20	0.523603	0.316953	0.20665	99.774	AT5TE60215	0	CHH	Hypo-methylation
Chr5	16681461	16681534	74	37	0.303508	0.0181636	0.285344	269.138	AT5TE60215	0	CHH	Hypo-methylation
Chr5	17030524	17030578	55	15	0.575704	0.385354	0.19035	73.8838	AT5TE61485	0	CHH	Hypo-methylation
Chr5	17107692	17107772	81	27	0.0012084	0.169051	-0.167843	-161.693	AT5TE61795	0	CHH	Hyper-methylation
Chr5	17327415	17327518	104	30	0.0511928	0.28348	-0.232287	-299.692	AT5G06475	552	CHH	Hyper-methylation
Chr5	17582962	17583064	103	26	0.109957	0.297261	-0.187304	-150.241	AT5G43755	0	CHH	Hyper-methylation
Chr5	17710709	17710795	87	20	0.309542	0.0876433	0.221898	148.464	AT5TE63990	0	CHH	Hypo-methylation
Chr5	17852497	17852559	63	21	0.448967	0.27919	0.169777	85.5885	AT5TE64455	0	CHH	Hypo-methylation
Chr5	18892772	18892880	109	23	0.0166636	0.287546	-0.270883	-211.054	AT5G06855	479	CHH	Hyper-methylation
Chr5	19178991	19179095	105	25	0.00125305	0.173486	-0.172233	-193.607	AT5TE69000	0	CHH	Hyper-methylation
Chr5	19743576	19743652	77	18	0.397588	0.213364	0.184224	91.7847	AT5TE71040	0	CHH	Hypo-methylation
Chr5	19809812	19809866	55	15	0.213659	0.0625363	0.151123	89.7688	AT5G48860	1786	CHH	Hypo-methylation
Chr5	19830084	19830189	106	15	0.00965535	0.253762	-0.244107	-112.304	AT5G07295	-114	CHH	Hyper-methylation
Chr5	19832452	19832539	88	16	0.47553	0.268496	0.207034	81.6331	AT5TE71380	-11	CHH	Hypo-methylation
Chr5	20076274	20076419	146	39	0.00637386	0.236346	-0.229972	-411.758	AT5G49490	90	CHH	Hyper-methylation
Chr5	20856680	20856753	74	20	0.415475	0.228132	0.187343	106.226	AT5TE75120	0	CHH	Hypo-methylation
Chr5	21776509	21776559	51	9	0.442784	0.219247	0.223536	51.983	AT5TE78450	0	CHH	Hypo-methylation
Chr5	22093291	22093363	73	17	0.342995	0.135901	0.207094	116.415	AT5TE79530	0	CHH	Hypo-methylation
Chr5	22574934	22575013	80	26	0.0678418	0.253248	-0.185406	-188.695	AT5G55770	1203	CHH	Hyper-methylation
Chr5	22642797	22642916	120	35	0.294093	0.0693243	0.224768	294.655	AT5G55910	-384	CHH	Hypo-methylation
Chr5	22703660	22703726	67	17	0.0138922	0.156356	-0.142464	-117.117	AT5G56060	-498	CHH	Hyper-methylation
Chr5	24370835	24370897	63	21	0.697628	0.4325	0.265128	146.979	AT5TE87680	0	CHH	Hypo-methylation
Chr5	25668470	25668531	62	22	0.235193	0.0845884	0.150605	135.526	AT5G64140	0	CHH	Hypo-methylation

## Sheet: Supplementary Dataset 3
Supplementary Dataset 3 RNA-seq statistics
Summary statistics and sample descriptions for RNA-seq samples generated for this study.
Library name	Sample	Germplasm	Condition	Tissue	Age	Platform	Read layout	Mapped reads	Mean depth	Assigned genic reads
Exp532_Col-0_2-r1_S1_R1_001.fastq.gz	WT naive rep 1	Col-0	N	True leaves #4-9	3 weeks	NextSeq 500	75 bp single-end	15123019	20.4397	14551554
Exp532_Col-0_2-r2_S2_R1_001.fastq.gz	WT naive rep 2	Col-0	N	True leaves #4-9	3 weeks	NextSeq 500	75 bp single-end	28243686	34.6748	27976393
Exp532_Col-0_2-r3_S3_R1_001.fastq.gz	WT naive rep 3	Col-0	N	True leaves #4-9	3 weeks	NextSeq 500	75 bp single-end	27761950	36.7921	27449585
Exp532_Col-0_3-r1_S7_R1_001.fastq.gz	WT primed rep 1	Col-0	P	True leaves #4-9	3 weeks	NextSeq 500	75 bp single-end	32033086	38.6209	31688644
Exp532_Col-0_3-r2_S8_R1_001.fastq.gz	WT primed rep 2	Col-0	P	True leaves #4-9	3 weeks	NextSeq 500	75 bp single-end	28655326	34.1043	28408309
Exp532_Col-0_3-r3_S9_R1_001.fastq.gz	WT primed rep 3	Col-0	P	True leaves #4-9	3 weeks	NextSeq 500	75 bp single-end	33306446	39.2722	33025896
Exp532_Col-0_4-r1_S13_R1_001.fastq.gz	WT naïve + triggered rep 1	Col-0	N+T	True leaves #4-9	3 weeks	NextSeq 500	75 bp single-end	7730908	12.7259	7624333
Exp532_Col-0_4-r2_S14_R1_001.fastq.gz	WT naïve + triggered rep 2	Col-0	N+T	True leaves #4-9	3 weeks	NextSeq 500	75 bp single-end	27492302	36.7921	27222042
Exp532_Col-0_4-r3_S15_R1_001.fastq.gz	WT naïve + triggered rep 3	Col-0	N+T	True leaves #4-9	3 weeks	NextSeq 500	75 bp single-end	3694007	7.80334	3658347
Exp532_Col-0_5-r1_S16_R1_001.fastq.gz	WT primed + triggered rep 1	Col-0	P+T	True leaves #4-9	3 weeks	NextSeq 500	75 bp single-end	22384574	29.8086	22135789
Exp532_Col-0_5-r2_S17_R1_001.fastq.gz	WT primed + triggered rep 2	Col-0	P+T	True leaves #4-9	3 weeks	NextSeq 500	75 bp single-end	26654669	34.369	26402292
Exp532_Col-0_5-r3_S18_R1_001.fastq.gz	WT primed + triggered rep 3	Col-0	P+T	True leaves #4-9	3 weeks	NextSeq 500	75 bp single-end	25241633	32.9696	25016495

## Sheet: Supplementary Dataset 4
Supplementary Dataset 4 Differentially expressed genes following triggering stress in naive plants
Differentially expressed genes identified using the edgeR-quasi-likelihood pipeline (FDR < 0.05) between naive and naive-triggered plants (N+T/N).
Locus Identifier	Gene Model Description	Gene Model Type	Primary Gene Symbol	Other Gene Symbols	log2 FC	Average log2 CPM	FDR adjusted P-value
AT3G21500	1-deoxy-D-xylulose 5-phosphate synthase 1	protein_coding	1-deoxy-D-xylulose 5-phosphate synthase 1	DXL1,DXS-like 1,DXS2,1-deoxy-D-xylulose 5-phosphate (DXP) synthase 2	12.461	2.53818	0.026553
AT4G16260	Glycosyl hydrolase superfamily protein	protein_coding	NA	NA	12.331	4.99789	0.042209
AT1G52560	HSP20-like chaperones superfamily protein	protein_coding	NA	NA	10.3189	3.74558	0.035366
AT1G80160	Lactoylglutathione lyase / glyoxalase I family protein	protein_coding	glyoxylase I 7	NA	10.0971	3.58372	0.041801
AT3G09640	ascorbate peroxidase 2	protein_coding	ascorbate peroxidase 2	APX1B,ASCORBATE PEROXIDASE 1B	9.87582	1.03734	0.031137
AT1G17020	senescence-related gene 1	protein_coding	senescence-related gene 1	ATSRG1,SENESCENCE-RELATED GENE 1	9.8211	3.20385	0.039888
AT4G27670	heat shock protein 21	protein_coding	heat shock protein 21	NA	9.6921	3.24358	0.048882
AT1G15520	pleiotropic drug resistance 12	protein_coding	ATP-binding cassette G40	ATABCG40,Arabidopsis thaliana ATP-binding cassette G40,ATPDR12,PLEIOTROPIC DRUG RESISTANCE 12,PDR12,pleiotropic drug resistance 12	9.68142	5.71455	0.045039
AT5G39610	NAC domain containing protein 6	protein_coding	NAC domain containing protein6	ANAC092,Arabidopsis NAC domain containing protein 92,ATNAC2,NAC domain containing protein2,ATNAC6,NAC domain containing protein6,NAC2,NAC domain containing protein2,ORE1,ORESARA 1	9.60123	2.92098	0.041919
AT2G30770	cytochrome P450 family 71 polypeptide	protein_coding	cytochrome P450%2C family 71%2C subfamily A%2C polypeptide 13	NA	9.38587	4.98288	0.031881
AT4G24000	cellulose synthase like G2	protein_coding	cellulose synthase like G2	ATCSLG2,ARABIDOPSIS THALIANA CELLULOSE SYNTHASE LIKE G2	9.24827	4.71406	0.038289
AT1G68620	alpha/beta-Hydrolases superfamily protein	protein_coding	NA	NA	9.18841	4.38697	0.025553
AT3G13950	ankyrin	protein_coding	NA	NA	8.99313	2.48727	0.025134
AT4G29340	profilin 4	protein_coding	profilin 4	NA	8.77749	1.82623	0.013079
AT2G14610	pathogenesis-related protein 1	protein_coding	pathogenesis-related gene 1	ATPR1,PATHOGENESIS-RELATED GENE 1,PR 1,PATHOGENESIS-RELATED GENE 1	8.55293	6.76701	0.045534
AT3G28210	zinc finger (AN1-like) family protein	protein_coding	NA	NA	8.13436	4.97294	0.041573
AT1G19250	flavin-dependent monooxygenase 1	protein_coding	flavin-dependent monooxygenase 1	NA	7.79511	2.85663	0.027297
AT3G48850	phosphate transporter 3%3B2	protein_coding	phosphate transporter 3%3B2	MPT2,mitochondrial phosphate transporter 2	7.71412	3.1215	0.039923
AT4G23680	Polyketide cyclase/dehydrase and lipid transport superfamily protein	protein_coding	NA	NA	7.54102	2.52036	0.009439
AT1G09080	Heat shock protein 70 (Hsp 70) family protein	protein_coding	binding protein 3	NA	7.50235	5.38006	0.026045
AT1G47510	inositol polyphosphate 5-phosphatase 11	protein_coding	inositol polyphosphate 5-phosphatase 11	AT5PTASE11,ARABIDOPSIS THALIANA INOSITOL POLYPHOSPHATE 5-PHOSPHATASE 11	7.32388	5.07256	0.045627
AT2G37750	hypothetical protein	protein_coding	NA	NA	7.30338	0.799573	0.031804
AT3G08970	DNAJ heat shock N-terminal domain-containing protein	protein_coding	NA	NA	7.29711	7.25762	0.009761
AT5G54165	Avr9/Cf-9 rapidly elicited protein	protein_coding	NA	NA	7.18597	3.85976	0.020447
AT1G09715	NA	novel_transcribed_region	NA	NA	7.14653	0.736478	0.026045
AT3G51910	heat shock transcription factor A7A	protein_coding	heat shock transcription factorA7A	AT-HSFA7A,ARABIDOPSIS THALIANA HEAT SHOCK TRANSCRIPTION FACTORA7A	7.02243	5.81441	0.045039
AT5G25450	Cytochrome bd ubiquinol oxidase%2C 14kDa subunit	protein_coding	NA	NA	6.92758	5.52995	0.026315
AT1G03070	Bax inhibitor-1 family protein	protein_coding	NA	AtLFG4,LFG4,LIFEGUARD 4	6.91359	3.03058	0.023519
AT3G22600	Bifunctional inhibitor/lipid-transfer protein/seed storage 2S albumin superfamily protein	protein_coding	NA	LTPG5,glycosylphosphatidylinositol-anchored lipid protein transfer 5	6.78145	3.93923	0.049765
AT1G58340	MATE efflux family protein	protein_coding	NA	NA	6.56095	3.14494	0.038759
AT2G13810	AGD2-like defense response protein 1	protein_coding	AGD2-like defense response protein 1	AtALD1,EDTS5,eds two suppressor 5	6.53803	1.91086	0.019347
AT1G16030	heat shock protein 70B	protein_coding	heat shock protein 70B	NA	6.51846	7.21481	0.037669
AT5G02780	glutathione transferase lambda 1	protein_coding	glutathione transferase lambda 1	NA	6.47671	1.52556	0.047982
AT5G64510	tunicamycin induced protein	protein_coding	tunicamycin induced 1	NA	6.41726	7.21519	0.01721
AT1G74590	glutathione S-transferase TAU 10	protein_coding	glutathione S-transferase TAU 10	ATGSTU10,GLUTATHIONE S-TRANSFERASE TAU 10	6.38042	2.92692	0.039787
AT2G43570	chitinase	protein_coding	chitinase%2C putative	NA	6.30336	6.64509	0.047401
AT3G15340	proton pump interactor 2	protein_coding	proton pump interactor 2	NA	6.26576	3.36318	0.013729
AT5G54510	Auxin-responsive GH3 family protein	protein_coding	DWARF IN LIGHT 1	GH3.6,Gretchen Hagen3.6	6.26283	4.8014	0.019665
AT3G49580	response to low sulfur 1	protein_coding	RESPONSE TO LOW SULFUR 1	NA	6.24266	0.559974	0.013444
AT1G73010	inorganic pyrophosphatase 1	protein_coding	phosphate starvation-induced gene 2	ATPS2,phosphate starvation-induced gene 2,AtPPsPase1,pyrophosphate-specific phosphatase1,PPsPase1,pyrophosphate-specific phosphatase1	6.15191	1.74945	0.010762
AT1G05340	cysteine-rich TM module stress tolerance protein	protein_coding	NA	NA	5.97464	4.17554	0.041923
AT4G23493	hypothetical protein	protein_coding	NA	NA	5.95304	2.37675	0.011357
AT2G22470	arabinogalactan protein 2	protein_coding	arabinogalactan protein 2	ATAGP2	5.90989	5.27653	0.040251
AT3G24500	multiprotein bridging factor 1C	protein_coding	multiprotein bridging factor 1C	ATMBF1C	5.81807	7.89736	0.031438
AT3G04070	NAC domain containing protein 47	protein_coding	NAC domain containing protein 47	ANAC047,NAC domain containing protein 47,SHG,SPEEDY HYPONASTIC GROWTH	5.81276	2.99302	0.03443
AT2G32120	heat-shock protein 70T-2	protein_coding	heat-shock protein 70T-2	NA	5.69488	5.8877	0.03729
AT3G53230	ATPase%2C AAA-type%2C CDC48 protein	protein_coding	cell division cycle 48B	NA	5.65655	8.17816	0.011886
AT5G02490	Heat shock protein 70 (Hsp 70) family protein	protein_coding	NA	NA	5.59182	8.55186	0.007786
AT5G59820	C2H2-type zinc finger family protein	protein_coding	RESPONSIVE TO HIGH LIGHT 41	AtZAT12,ZAT12	5.5528	4.19896	0.032523
AT1G02920	glutathione S-transferase 7	protein_coding	glutathione S-transferase 7	ATGST11,ARABIDOPSIS GLUTATHIONE S-TRANSFERASE 11,ATGSTF7,ATGSTF8,GST11,GLUTATHIONE S-TRANSFERASE 11	5.54533	7.89622	0.039431
AT5G44380	FAD-binding Berberine family protein	protein_coding	NA	NA	5.49054	1.56449	0.049213
AT3G29250	NAD(P)-binding Rossmann-fold superfamily protein	protein_coding	short-chain dehydrogenase reductase 4	AtSDR4	5.48238	1.61013	0.043533
AT1G54050	HSP20-like chaperones superfamily protein	protein_coding	NA	NA	5.41426	8.13601	0.02427
AT2G29480	glutathione S-transferase tau 2	protein_coding	glutathione S-transferase tau 2	ATGSTU2,glutathione S-transferase tau 2,GST20,GLUTATHIONE S-TRANSFERASE 20	5.40319	0.99029	0.047084
AT2G17500	Auxin efflux carrier family protein	protein_coding	NA	PILS5,PIN-LIKES 5	5.39251	4.45482	0.029925
AT1G11100	SNF2 domain-containing protein / helicase domain-containing protein / zinc finger protein-like protein	protein_coding	NA	FRG5,SNF2-RING-HELICASE?LIKE 5	5.36695	2.6079	0.006403
AT4G08555	hypothetical protein	protein_coding	NA	NA	5.25892	2.73868	0.045243
AT5G37670	HSP20-like chaperones superfamily protein	protein_coding	NA	NA	5.23125	4.73321	0.035255
AT1G09500	NAD(P)-binding Rossmann-fold superfamily protein	protein_coding	NA	NA	5.19448	5.29577	0.026611
AT5G44480	NAD(P)-binding Rossmann-fold superfamily protein	protein_coding	DEFECTIVE UGE IN ROOT	NA	5.13804	0.679414	0.048434
AT3G14620	cytochrome P450%2C family 72%2C subfamily A%2C polypeptide 8	protein_coding	cytochrome P450%2C family 72%2C subfamily A%2C polypeptide 8	NA	5.12362	8.02217	0.014025
AT5G48400	Glutamate receptor family protein	protein_coding	NA	NA	5.11941	1.50294	0.024564
AT1G66090	Disease resistance protein (TIR-NBS class)	protein_coding	NA	NA	5.11331	5.96997	0.037996
AT4G13395	ROTUNDIFOLIA like 12	protein_coding	ROTUNDIFOLIA like 12	DVL10,DEVIL 10	5.10795	1.07693	0.049312
AT3G18250	Putative membrane lipoprotein	protein_coding	NA	NA	5.08021	1.03792	0.031757
AT3G04720	pathogenesis-related 4	protein_coding	pathogenesis-related 4	AtPR4,HEL,HEVEIN-LIKE,PR-4	5.07592	6.36939	0.017004
AT1G21550	Calcium-binding EF-hand family protein	protein_coding	NA	NA	5.04884	6.34985	0.018884
AT1G72660	P-loop containing nucleoside triphosphate hydrolases superfamily protein	protein_coding	NA	Drg1-3	5.02719	3.54589	0.041458
AT4G03320	translocon at the inner envelope membrane of chloroplasts 20-IV	protein_coding	translocon at the inner envelope membrane of chloroplasts 20-IV	AtTic20-IV,translocon at the inner envelope membrane of chloroplasts 20-IV	4.9796	2.85951	0.018483
AT4G32480	sugar phosphate exchanger%2C putative (DUF506)	protein_coding	NA	NA	4.95225	2.65909	0.02557
AT3G59930	defensin-like protein	protein_coding	NA	NA	4.93362	1.83289	0.047913
AT1G03850	Glutaredoxin family protein	protein_coding	glutaredoxin 13	ATGRXS13,glutaredoxin 13	4.92376	0.497572	0.031094
AT3G63060	EID1-like 3	protein_coding	EID1-like 3	NA	4.90708	3.21492	0.036897
AT5G59720	heat shock protein 18.2	protein_coding	heat shock protein 18.2	NA	4.90584	3.00728	0.041289
AT1G26800	RING/U-box superfamily protein	protein_coding	NA	NA	4.89383	4.91628	0.008512
AT2G36800	don-glucosyltransferase 1	protein_coding	don-glucosyltransferase 1	UGT73C5,UDP-GLUCOSYL TRANSFERASE 73C5	4.88329	4.92554	0.014819
AT5G05410	DRE-binding protein 2A	protein_coding	DRE-binding protein 2A	DREB2,DEHYDRATION-RESPONSIVE ELEMENT BINDING PROTEIN 2	4.87705	6.03061	0.036989
AT5G42020	Heat shock protein 70 (Hsp 70) family protein	protein_coding	NA	NA	4.85326	9.99826	0.004842
AT2G36750	UDP-glucosyl transferase 73C1	protein_coding	UDP-glucosyl transferase 73C1	NA	4.78089	2.72967	0.040743
AT1G04980	PDI-like 2-2	protein_coding	PDI-like 2-2	ATPDI10,ARABIDOPSIS THALIANA PROTEIN DISULFIDE ISOMERASE 10,ATPDIL2-2,PDI-like 2-2,PDI10,PROTEIN DISULFIDE ISOMERASE	4.77754	6.42072	0.006186
AT2G46240	BCL-2-associated athanogene 6	protein_coding	BCL-2-associated athanogene 6	ATBAG6,ARABIDOPSIS THALIANA BCL-2-ASSOCIATED ATHANOGENE 6	4.77497	8.43043	0.043709
AT1G68440	transmembrane protein	protein_coding	NA	NA	4.77473	4.1844	0.00355
AT5G03210	E3 ubiquitin-protein ligase	protein_coding	DBP-interacting protein 2	AtDIP2	4.76902	5.74259	0.04865
AT3G48640	transmembrane protein	protein_coding	NA	NA	4.70791	1.15017	0.039787
AT3G53160	UDP-glucosyl transferase 73C7	protein_coding	UDP-glucosyl transferase 73C7	NA	4.65939	1.85612	0.018338
AT1G56170	nuclear factor Y%2C subunit C2	protein_coding	nuclear factor Y%2C subunit C2	ATHAP5B,HAP5B	4.65779	5.49586	0.00355
AT5G25130	cytochrome P450%2C family 71%2C subfamily B%2C polypeptide 12	protein_coding	cytochrome P450%2C family 71%2C subfamily B%2C polypeptide 12	NA	4.59361	3.52643	0.026721
AT5G10695	methionyl-tRNA synthetase	protein_coding	NA	NA	4.56876	4.61647	0.025094
AT4G07190	Natural antisense transcript overlaps with AT4G23890	antisense_long_noncoding_rna	NA	NA	4.555	0.778125	0.017973
AT4G36990	heat shock factor 4	protein_coding	heat shock factor 4	AT-HSFB1,ARABIDOPSIS THALIANA CLASS B HEAT SHOCK FACTOR B1,ATHSF4,ARABIDOPSIS THALIANA HEAT SHOCK FACTOR 4,HSFB1,CLASS B HEAT SHOCK FACTOR B1,TBF1,TL1-binding transcription factor 1	4.53633	6.55326	0.025457
AT1G76600	poly polymerase	protein_coding	NA	NA	4.4727	4.49607	0.049088
AT1G15670	Galactose oxidase/kelch repeat superfamily protein	protein_coding	NA	KFB01,Kelch repeat F-box 1,KMD2,KISS ME DEADLY 2	4.43046	3.23297	0.013513
AT1G14360	UDP-galactose transporter 3	protein_coding	UDP-galactose transporter 3	ATUTR3	4.4004	6.94991	0.003423
AT2G02810	UDP-galactose transporter 1	protein_coding	UDP-galactose transporter 1	ATUTR1,UDP-GALACTOSE TRANSPORTER 1	4.37021	5.77673	0.004169
AT1G02470	Polyketide cyclase/dehydrase and lipid transport superfamily protein	protein_coding	NA	NA	4.36438	0.89396	0.009761
AT3G21150	B-box 32	protein_coding	B-box domain protein 32	AtBBX32,EIP6,EMF1-Interacting Protein 6	4.35137	1.9894	0.014025
AT5G04340	6	protein_coding	zinc finger of Arabidopsis thaliana 6	AtZAT6,C2H2,CZF2,COLD INDUCED ZINC FINGER PROTEIN 2	4.317	4.70251	0.045898
AT1G14200	RING/U-box superfamily protein	protein_coding	NA	NA	4.2959	5.07224	0.020181
AT1G01720	NAC (No Apical Meristem) domain transcriptional regulator superfamily protein	protein_coding	NA	NA	4.26996	6.15962	0.031094
AT3G10020	plant/protein	protein_coding	NA	NA	4.25898	7.02916	0.028194
AT1G29640	senescence regulator (Protein of unknown function%2C DUF584)	protein_coding	NA	NA	4.24869	1.95915	0.03719
AT2G40000	ortholog of sugar beet HS1 PRO-1 2	protein_coding	ortholog of sugar beet HS1 PRO-1 2	ATHSPRO2,ARABIDOPSIS ORTHOLOG OF SUGAR BEET HS1 PRO-1 2	4.21481	4.72833	0.038571
AT5G20960	aldehyde oxidase 1	protein_coding	aldehyde oxidase 1	AAO1,aldehyde oxidase 1,AOalpha,aldehyde oxidase alpha,AT-AO1,ARABIDOPSIS THALIANA ALDEHYDE OXIDASE 1,ATAO,AtAO1,Arabidopsis thaliana aldehyde oxidase 1	4.21184	4.4959	0.022765
AT4G17500	ethylene responsive element binding factor 1	NA	NA	ATERF-1,ethylene responsive element binding factor 1,AtERF	4.20324	3.33659	0.029161
AT3G51860	cation exchanger 3	protein_coding	cation exchanger 3	ATCAX3,ATHCX1,CAX1-LIKE	4.17776	5.89177	0.011684
AT1G02220	NAC domain containing protein 3	protein_coding	NAC domain containing protein 3	ANAC003,NAC domain containing protein 3	4.16778	3.60995	0.039075
AT4G12410	SAUR-like auxin-responsive protein family	protein_coding	NA	SAUR35,SMALL AUXIN UPREGULATED RNA 35	4.14389	1.01562	0.039448
AT1G60730	NAD(P)-linked oxidoreductase superfamily protein	protein_coding	NA	NA	4.13076	5.58131	0.039295
AT3G19580	zinc-finger protein 2	protein_coding	zinc-finger protein 2	AZF2,zinc-finger protein 2	4.12537	2.71677	0.032077
AT4G29520	nucleophosmin	protein_coding	NA	NA	4.11501	6.89546	0.008936
AT4G21320	Aldolase-type TIM barrel family protein	protein_coding	HEAT-STRESS-ASSOCIATED 32	NA	4.11174	4.14854	0.03123
AT3G62260	Protein phosphatase 2C family protein	protein_coding	NA	NA	4.09624	4.84292	0.014021
AT1G32950	Subtilase family protein	protein_coding	NA	NA	4.09615	0.904042	0.014278
AT5G41610	cation/H+ exchanger 18	protein_coding	cation/H+ exchanger 18	ATCHX18,ARABIDOPSIS THALIANA CATION/H+ EXCHANGER 18	4.08195	1.34064	0.032053
AT5G60610	F-box/RNI-like superfamily protein	protein_coding	NA	NA	4.05222	0.154345	0.045243
AT1G77510	PDI-like 1-2	protein_coding	PDI-like 1-2	ATPDI6,PROTEIN DISULFIDE ISOMERASE 6,ATPDIL1-2,PDI-like 1-2,PDI6,PROTEIN DISULFIDE ISOMERASE 6	4.0509	7.7426	0.010557
AT2G46680	homeobox 7	protein_coding	homeobox 7	ATHB-7,homeobox 7,ATHB7,ARABIDOPSIS THALIANA HOMEOBOX 7	4.04613	3.73591	0.047313
AT2G37130	Peroxidase superfamily protein	protein_coding	NA	NA	4.04415	4.32547	0.014278
AT2G24100	ATP-dependent DNA helicase	protein_coding	ALTERED SEED GERMINATION 1	NA	4.04298	4.8872	0.025947
AT5G58770	Undecaprenyl pyrophosphate synthetase family protein	protein_coding	cis-prenyltransferase 4	AtcPT4	4.02983	7.31254	0.01335
AT2G25140	casein lytic proteinase B4	protein_coding	casein lytic proteinase B4	CLPB-M,CASEIN LYTIC PROTEINASE B-M,HSP98.7,HEAT SHOCK PROTEIN 98.7	4.02567	6.79327	0.018483
AT5G16980	Zinc-binding dehydrogenase family protein	protein_coding	NA	NA	4.00699	3.41117	0.047905
AT5G28540	heat shock protein 70 (Hsp 70) family protein	protein_coding	NA	NA	3.99729	9.98092	0.006719
AT1G33960	P-loop containing nucleoside triphosphate hydrolases superfamily protein	protein_coding	AVRRPT2-INDUCED GENE 1	NA	3.99666	3.30551	0.047185
AT4G28390	ADP/ATP carrier 3	protein_coding	ADP/ATP carrier 3	ATAAC3	3.97431	3.62371	0.018146
AT3G46090	C2H2 and C2HC zinc fingers superfamily protein	protein_coding	NA	NA	3.97197	1.48976	0.019126
AT5G37260	Homeodomain-like superfamily protein	protein_coding	REVEILLE 2	CIR1,CIRCADIAN 1	3.96446	3.107	0.006546
AT1G66500	Pre-mRNA cleavage complex II	protein_coding	NA	NA	3.96444	4.54797	0.031557
AT4G38215	Natural antisense transcript overlaps with AT4G38210	antisense_long_noncoding_rna	NA	NA	3.94486	-0.03047	0.02799
AT1G13340	Regulator of Vps4 activity in the MVB pathway protein	protein_coding	NA	NA	3.9342	4.7425	0.026688
AT4G11910	STAY-GREEN-like protein	protein_coding	NA	NYE2,NONYELLOWING 2,SGR2,STAY-GREEN 2	3.91562	1.16051	0.033252
AT1G67920	hypothetical protein	protein_coding	NA	NA	3.91054	1.44463	0.042412
AT3G26440	transmembrane protein%2C putative (DUF707)	protein_coding	NA	NA	3.90393	2.07195	0.013513
AT5G39050	HXXXD-type acyl-transferase family protein	protein_coding	phenolic glucoside malonyltransferase 1	NA	3.89288	6.18338	0.042866
AT5G55970	RING/U-box superfamily protein	protein_coding	NA	NA	3.89073	2.68695	0.032053
AT5G40690	histone-lysine N-methyltransferase trithorax-like protein	protein_coding	NA	NA	3.86709	2.08713	0.013513
AT3G49570	response to low sulfur 3	protein_coding	RESPONSE TO LOW SULFUR 3	NA	3.85973	1.06192	0.027696
AT2G36950	Heavy metal transport/detoxification superfamily protein	protein_coding	NA	NA	3.85863	4.35612	0.01721
AT3G62600	DNAJ heat shock family protein	protein_coding	NA	NA	3.84878	7.72704	0.009062
AT5G18270	NAC domain containing protein 87	protein_coding	Arabidopsis NAC domain containing protein 87	NA	3.84626	0.320914	0.042699
AT3G07090	PPPDE putative thiol peptidase family protein	protein_coding	NA	NA	3.82522	8.07859	0.014025
AT1G23800	aldehyde dehydrogenase 2B7	protein_coding	aldehyde dehydrogenase 2B7	ALDH2B,aldehyde dehydrogenase 2B	3.79194	4.57214	0.028165
AT1G56600	galactinol synthase 2	protein_coding	galactinol synthase 2	AtGolS2,galactinol synthase 2	3.7905	3.14346	0.011416
AT4G15760	monooxygenase 1	protein_coding	monooxygenase 1	NA	3.78958	4.43263	0.044622
AT3G60540	Preprotein translocase Sec%2C Sec61-beta subunit protein	protein_coding	NA	NA	3.78952	3.50105	0.039568
AT5G03160	DnaJ P58IPK-like protein	protein_coding	homolog of mamallian P58IPK	ATP58IPK,homolog of mamallian P58IPK	3.77996	6.93734	0.003998
AT1G20350	translocase inner membrane subunit 17-1	protein_coding	translocase inner membrane subunit 17-1	ATTIM17-1,translocase inner membrane subunit 17-1	3.77231	2.93329	0.02999
AT1G65040	RING/U-box superfamily protein	protein_coding	homolog of yeast Hrd1	AtHrd1B,homolog of yeast Hrd1	3.75044	6.8198	0.004842
AT3G12500	basic chitinase	protein_coding	basic chitinase	ATHCHIB,basic chitinase,B-CHI,CHI-B,PR-3,PATHOGENESIS-RELATED 3,PR3,PATHOGENESIS-RELATED 3	3.74512	2.10334	0.01623
AT4G25000	alpha-amylase-like protein	protein_coding	alpha-amylase-like	ATAMY1	3.7418	2.78291	0.026709
AT5G61790	calnexin 1	protein_coding	calnexin 1	ATCNX1	3.73509	9.74999	0.008071
AT5G62020	heat shock transcription factor B2A	protein_coding	heat shock transcription factorB2A	AT-HSFB2A,ARABIDOPSIS THALIANA HEAT SHOCK TRANSCRIPTION FACTORB2A	3.72896	3.71971	0.01623
AT1G09210	calreticulin 1b	protein_coding	calreticulin 1b	AtCRT1b	3.71742	8.86538	0.015172
AT5G13820	telomeric DNA binding protein 1	protein_coding	telomeric DNA binding protein 1	ATBP-1,ATBP1,ATTBP1,HPPBF-1,H-PROTEIN PROMOTE	3.71475	3.24951	0.036642
AT4G20110	VACUOLAR SORTING RECEPTOR 7	protein_coding	VACUOLAR SORTING RECEPTOR 7	BP80-3%3B1,binding protein of 80 kDa 3%3B1,VSR3%3B1,VACUOLAR SORTING RECEPTOR 3%3B1	3.71376	4.50143	0.030114
AT5G18670	beta-amylase 3	protein_coding	beta-amylase 3	BAM9,BETA-AMYLASE 9	3.67479	2.59926	0.043447
AT4G24190	Chaperone protein htpG family protein	protein_coding	SHEPHERD	AtHsp90-7,HEAT SHOCK PROTEIN 90-7,AtHsp90.7,HEAT SHOCK PROTEIN 90.7,HSP90.7,HEAT SHOCK PROTEIN 90.7	3.66327	10.5395	0.009974
AT3G25230	rotamase FKBP 1	protein_coding	rotamase FKBP 1	ATFKBP62,FKBP62,FK506 BINDING PROTEIN 62	3.65414	9.18873	0.008532
AT4G15550	indole-3-acetate beta-D-glucosyltransferase	protein_coding	indole-3-acetate beta-D-glucosyltransferase	NA	3.65201	4.82498	0.025981
AT5G08790	NAC (No Apical Meristem) domain transcriptional regulator superfamily protein	protein_coding	NA	NA	3.63948	6.31729	0.024207
AT1G32940	Subtilase family protein	protein_coding	NA	NA	3.63041	5.48763	0.034305
AT4G21990	APS reductase 3	protein_coding	APS reductase 3	ATAPR3,PRH-26,PRH26,PAPS REDUCTASE HOMOLOG 26	3.629	6.42026	0.017907
AT1G55920	serine acetyltransferase 2%3B1	protein_coding	serine acetyltransferase 2%3B1	ATSERAT2%3B1,serine acetyltransferase 2%3B1,SAT1,SERINE ACETYLTRANSFERASE 1,SAT5,SERINE ACETYLTRANSFERASE 5	3.61659	5.23119	0.03342
AT3G21660	UBX domain-containing protein	protein_coding	NA	NA	3.61606	0.509906	0.037826
AT1G30070	SGS domain-containing protein	protein_coding	NA	NA	3.6009	6.98252	0.040283
AT3G16330	Avr9/Cf-9 rapidly elicited protein	protein_coding	NA	NA	3.58751	2.97692	0.031757
AT2G04100	MATE efflux family protein	protein_coding	NA	NA	3.57586	1.5348	0.040926
AT5G61820	stress up-regulated Nod 19 protein	protein_coding	NA	NA	3.57315	8.00827	0.036535
AT1G74020	strictosidine synthase 2	protein_coding	strictosidine synthase 2	NA	3.56813	4.79529	0.02412
AT5G46500	protein VARIATION IN COMPOUND TRIGGERED ROOT growth protein	protein_coding	NA	NA	3.56622	2.57947	0.01623
AT3G15760	cytochrome P450 family protein	protein_coding	NA	NA	3.55456	1.45518	0.021092
AT2G41250	Haloacid dehalogenase-like hydrolase (HAD) superfamily protein	protein_coding	NA	NA	3.55428	2.80024	0.02971
AT3G13276	hypothetical protein	protein_coding	NA	NA	3.54629	0.618889	0.013019
AT5G18065	target of trans acting-siR480/255 protein	protein_coding	NA	HTT3,HEAT-INDUCED TAS1 TARGET 3	3.54398	2.69977	0.008333
AT2G25625	histone deacetylase-like protein	protein_coding	NA	CV,chloroplast vesiculation	3.50774	1.61929	0.027314
AT5G02020	E3 ubiquitin-protein ligase RLIM-like protein	protein_coding	Salt Induced Serine rich	NA	3.49136	1.765	0.029143
AT4G31354	hypothetical protein	protein_coding	NA	NA	3.4899	1.49246	0.009931
AT4G16690	methyl esterase 16	protein_coding	methyl esterase 16	ATMES16,ARABIDOPSIS THALIANA METHYL ESTERASE 16	3.4815	3.69154	0.015425
AT3G54960	PDI-like 1-3	protein_coding	PDI-like 1-3	ATPDI1,ARABIDOPSIS THALIANA PROTEIN DISULFIDE ISOMERASE 1,ATPDIL1-3,PDI-like 1-3,PDI1,PROTEIN DISULFIDE ISOMERASE 1	3.4776	6.30135	0.021958
AT5G54860	Major facilitator superfamily protein	protein_coding	NA	NA	3.47499	5.34123	0.010588
AT4G33150	lysine-ketoglutarate reductase/saccharopine dehydrogenase bifunctional enzyme	protein_coding	NA	LKR,LKR/SDH,LYSINE-KETOGLUTARATE REDUCTASE/SACCHAROPINE DEHYDROGENASE,SDH,SACCHAROPINE DEHYDROGENASE	3.46874	4.50892	0.034169
AT4G27657	hypothetical protein	protein_coding	NA	NA	3.45373	1.89834	0.021197
AT2G28110	Exostosin family protein	protein_coding	FRAGILE FIBER 8	IRX7,IRREGULAR XYLEM 7	3.45232	1.85225	0.026286
AT3G22460	O-acetylserine (thiol) lyase (OAS-TL) isoform A2	protein_coding	O-acetylserine (thiol) lyase (OAS-TL) isoform A2	NA	3.44251	1.4626	0.024303
AT2G19310	HSP20-like chaperones superfamily protein	protein_coding	NA	NA	3.43009	8.39444	0.026941
AT2G00340	NA	novel_transcribed_region	NA	NA	3.40101	-0.07031	0.00788
AT5G47120	BAX inhibitor 1	protein_coding	BAX inhibitor 1	ATBI-1,ARABIDOPSIS BAX INHIBITOR 1,ATBI1,BAX inhibitor 1,BI-1	3.39927	7.66385	0.004951
AT4G11660	winged-helix DNA-binding transcription factor family protein	protein_coding	NA	NA	3.39353	5.44431	0.040231
AT4G29330	DERLIN-1	protein_coding	DERLIN-1	NA	3.38837	6.57547	0.003792
AT5G09590	mitochondrial HSO70 2	protein_coding	mitochondrial HSO70 2	HSC70-5,HEAT SHOCK COGNATE	3.38632	8.56061	0.015149
AT3G24090	putative glucosamine-fructose-6-phosphate aminotransferase	protein_coding	L-glutamine D-fructose-6-phosphate amidotransferase	NA	3.38243	4.14453	0.010508
AT5G13320	Auxin-responsive GH3 family protein	protein_coding	AVRPPHB SUSCEPTIBLE 3	AtGH3.12,GDG1,GH3-LIKE DEFENSE GENE 1,GH3.12,GRETCHEN HAGEN 3.12,WIN3,HOPW1-1-INTERACTING 3	3.37773	3.8641	0.024008
AT3G17790	purple acid phosphatase 17	protein_coding	purple acid phosphatase 17	ATACP5,ATPAP17	3.37274	6.26438	0.013463
AT1G17745	D-3-phosphoglycerate dehydrogenase	protein_coding	3-phosphoglycerate dehydrogenase	PGDH2,phosphoglycerate dehydrogenase 2	3.36812	6.34363	0.038447
AT4G27652	hypothetical protein	protein_coding	NA	NA	3.36473	2.76686	0.0144
AT4G15420	Ubiquitin fusion degradation UFD1 family protein	protein_coding	NA	NA	3.35691	5.65963	0.031438
AT5G18340	ARM repeat superfamily protein	protein_coding	NA	NA	3.35192	2.73485	0.037669
AT4G30490	AFG1-like ATPase family protein	protein_coding	NA	NA	3.35101	5.78508	0.008011
AT3G53830	Regulator of chromosome condensation (RCC1) family protein	protein_coding	NA	NA	3.35036	5.64819	0.003998
AT1G67360	Rubber elongation factor protein (REF)	protein_coding	NA	NA	3.34782	7.57809	0.040664
AT5G13210	Uncharacterized conserved protein UCP015417%2C vWA	protein_coding	NA	NA	3.34469	4.2143	0.019131
AT4G34230	cinnamyl alcohol dehydrogenase 5	protein_coding	cinnamyl alcohol dehydrogenase 5	ATCAD5,cinnamyl alcohol dehydrogenase 5,CAD-5,cinnamyl alcohol dehydrogenase 5	3.33513	6.25814	0.024989
AT3G56200	Transmembrane amino acid transporter family protein	protein_coding	NA	NA	3.32815	4.63069	0.010423
AT1G27330	Ribosome associated membrane protein RAMP4	protein_coding	NA	NA	3.32773	6.96703	0.008326
AT3G29575	ABI five binding protein 3	protein_coding	ABI five binding protein 3	NA	3.31744	4.91439	0.015296
AT2G32140	transmembrane receptor	protein_coding	NA	NA	3.31483	2.93296	0.010557
AT1G72900	Toll-Interleukin-Resistance (TIR) domain-containing protein	protein_coding	NA	NA	3.31358	5.50431	0.023519
AT3G03520	non-specific phospholipase C3	protein_coding	non-specific phospholipase C3	NA	3.30278	4.42743	0.007667
AT2G32920	PDI-like 2-3	protein_coding	PDI-like 2-3	ATPDI9,ARABIDOPSIS THALIANA PROTEIN DISULFIDE ISOMERASE 9,ATPDIL2-3,PDI-like 2-3,PDI9,PROTEIN DISULFIDE ISOMERASE 9	3.30238	7.40719	0.00805
AT3G23920	beta-amylase 1	protein_coding	beta-amylase 1	AtBAM1,BMY7,BETA-AMYLASE 7,TR-BAMY	3.29318	7.63523	0.018785
AT5G63790	NAC domain containing protein 102	protein_coding	NAC domain containing protein 102	ANAC102,NAC domain containing protein 102	3.28777	6.42844	0.037553
AT5G53120	spermidine synthase 3	protein_coding	spermidine synthase 3	ATSPDS3,SPERMIDINE SYNTHASE 3,SPMS	3.27891	6.54799	0.012464
AT3G17611	RHOMBOID-like protein 14	protein_coding	RHOMBOID-like protein 14	ATRBL10,RHOMBOID-like protein 10,ATRBL14,RHOMBOID-like protein 14,RBL10,RHOMBOID-like protein 10	3.27155	4.72045	0.021376
AT2G25110	stromal cell-derived factor 2-like protein precursor	protein_coding	stromal cell-derived factor 2-like protein precursor	ATSDL,ATSDF2-LIKE,AtSDF2,Arabidopsis thaliana STROMAL CELL-DERIVED FACTOR 2-like protein precursor	3.2712	7.0533	0.004842
AT3G12510	MADS-box family protein	protein_coding	NA	NA	3.25928	1.60401	0.040946
AT4G31398	Natural antisense transcript overlaps with AT4G31400	antisense_long_noncoding_rna	NA	NA	3.24344	0.356638	0.025457
AT3G14280	LL-diaminopimelate aminotransferase	protein_coding	NA	NA	3.23171	1.64921	0.047913
AT5G53400	HSP20-like chaperones superfamily protein	protein_coding	BOBBER1	NA	3.22086	6.6757	0.009736
AT3G12050	Aha1 domain-containing protein	protein_coding	NA	NA	3.21964	7.95796	0.018146
AT3G02800	Tyrosine phosphatase family protein	NA	NA	NA	3.21466	0.99817	0.04779
AT4G34630	prostatic spermine-binding-like protein	protein_coding	NA	NA	3.21408	5.83047	0.00788
AT1G63840	RING/U-box superfamily protein	protein_coding	NA	NA	3.21114	4.03816	0.041215
AT4G33540	metallo-beta-lactamase family protein	protein_coding	NA	NA	3.21073	5.82489	0.01568
AT5G24210	alpha/beta-Hydrolases superfamily protein	protein_coding	NA	NA	3.20596	6.41839	0.003423
AT1G70300	K+ uptake permease 6	protein_coding	K+ uptake permease 6	NA	3.20567	4.21066	0.020352
AT1G27350	Ribosome associated membrane protein RAMP4	protein_coding	NA	NA	3.20401	6.69738	0.006186
AT1G59590	ZCF37	protein_coding	NA	NA	3.19818	2.07694	0.021601
AT3G61890	homeobox 12	protein_coding	homeobox 12	ATHB-12,homeobox 12,ATHB12,ARABIDOPSIS THALIANA HOMEOBOX 12	3.19043	4.17929	0.038719
AT5G46350	WRKY DNA-binding protein 8	protein_coding	WRKY DNA-binding protein 8	ATWRKY8,ARABIDOPSIS THALIANA WRKY DNA-BINDING PROTEIN 8	3.17231	2.85217	0.033951
AT5G58350	with no lysine (K) kinase 4	protein_coding	with no lysine (K) kinase 4	ZIK2	3.17194	4.56949	0.015826
AT4G33660	cysteine-rich TM module stress tolerance protein	protein_coding	NA	NA	3.16832	3.73502	0.014025
AT2G21187	Natural antisense transcript overlaps with AT2G21185	antisense_long_noncoding_rna	NA	NA	3.16504	0.319899	0.033882
AT3G05630	phospholipase D P2	protein_coding	phospholipase D P2	PDLZ2,PHOSPHOLIPASE D ZETA 2,PLDZETA2,PHOSPHOLIPASE D ZETA 2	3.16388	3.0575	0.031983
AT4G23570	phosphatase-like protein	protein_coding	NA	NA	3.16026	7.96052	0.018146
AT2G37180	Aquaporin-like superfamily protein	protein_coding	RESPONSIVE TO DESICCATION 28	PIP2%3B3,PLASMA MEMBRANE INTRINSIC PROTEIN 2%3B3,PIP2C,PLASMA MEMBRANE INTRINSIC PROTEIN 2C	3.15047	7.61581	0.015669
AT4G37530	Peroxidase superfamily protein	protein_coding	NA	NA	3.14299	3.1736	0.041668
AT3G09405	Pectinacetylesterase family protein	protein_coding	NA	NA	3.12451	2.27779	0.015425
AT5G39090	HXXXD-type acyl-transferase family protein	protein_coding	NA	NA	3.11041	1.59417	0.04232
AT3G26170	cytochrome P450%2C family 71%2C subfamily B%2C polypeptide 19	protein_coding	cytochrome P450%2C family 71%2C subfamily B%2C polypeptide 19	NA	3.1078	4.58522	0.013729
AT1G08570	atypical CYS HIS rich thioredoxin 4	protein_coding	atypical CYSHIS rich thioredoxin 4	NA	3.10291	5.65721	0.019202
AT3G14590	Calcium-dependent lipid-binding (CaLB domain) family protein	protein_coding	NA	NA	3.09781	2.00597	0.040452
AT3G22910	ATPase E1-E2 type family protein / haloacid dehalogenase-like hydrolase family protein	protein_coding	NA	ACA13,auto-inhibited Ca2+ ATPase 13	3.0735	3.32116	0.048258
AT3G04710	ankyrin repeat family protein	protein_coding	tetratricopeptide repeat 10	NA	3.06567	5.98296	0.012777
AT3G04000	NAD(P)-binding Rossmann-fold superfamily protein	protein_coding	NA	NA	3.05965	3.16157	0.043802
AT3G06420	Ubiquitin-like superfamily protein	protein_coding	autophagy 8h	NA	3.0574	3.59774	0.015621
AT2G14620	xyloglucan endotransglucosylase/hydrolase 10	protein_coding	xyloglucan endotransglucosylase/hydrolase 10	NA	3.04992	1.34493	0.013586
AT2G29450	glutathione S-transferase tau 5	protein_coding	glutathione S-transferase tau5	AT103-1A,ATGSTU1,ARABIDOPSIS THALIANA GLUTATHIONE S-TRANSFERASE TAU1,ATGSTU5,glutathione S-transferase tau5	3.0467	10.0412	0.005818
AT3G15770	hypothetical protein	protein_coding	NA	NA	3.04212	3.7614	0.014021
AT5G60280	Concanavalin A-like lectin protein kinase family protein	protein_coding	NA	LecRK-I.8,L-type lectin receptor kinase I.8	3.04107	1.21457	0.049954
AT1G80320	2-oxoglutarate (2OG) and Fe(II)-dependent oxygenase superfamily protein	protein_coding	NA	NA	3.03625	1.08982	0.031983
AT4G26270	phosphofructokinase 3	protein_coding	phosphofructokinase 3	NA	3.01255	5.68403	0.016228
AT2G41150	plant/protein	protein_coding	NA	NA	3.00029	3.05766	0.004372
AT4G17250	transmembrane protein	protein_coding	NA	NA	2.98513	5.05019	0.016971
AT1G56340	calreticulin 1a	protein_coding	calreticulin 1a	AtCRT1a,CRT1,calreticulin 1	2.95769	8.76739	0.008326
AT2G16720	myb domain protein 7	protein_coding	myb domain protein 7	ATMYB7,ARABIDOPSIS THALIANA MYB DOMAIN PROTEIN 7,ATY49	2.95531	1.49758	0.036989
AT4G16660	heat shock protein 70 (Hsp 70) family protein	protein_coding	NA	NA	2.94172	8.4661	0.008054
AT5G15850	CONSTANS-like 1	protein_coding	CONSTANS-like 1	ATCOL1,BBX2,B-box domain protein 2	2.94124	4.09699	0.018483
AT1G21000	PLATZ transcription factor family protein	protein_coding	NA	NA	2.93875	4.3208	0.024008
AT1G03220	Eukaryotic aspartyl protease family protein	protein_coding	NA	NA	2.92399	7.02635	0.026615
AT3G13277	other_RNA	other_rna	NA	NA	2.92342	2.78634	0.009931
AT5G48180	nitrile specifier protein 5	protein_coding	nitrile specifier protein 5	AtNSP5	2.92037	7.44065	0.018483
AT1G17860	Kunitz family trypsin and protease inhibitor protein	protein_coding	NA	NA	2.91581	3.93819	0.043135
AT5G04250	Cysteine proteinases superfamily protein	protein_coding	NA	NA	2.91298	3.69842	0.036221
AT5G62430	cycling DOF factor 1	protein_coding	cycling DOF factor 1	NA	2.89786	4.95599	0.010588
AT3G17130	Plant invertase/pectin methylesterase inhibitor superfamily protein	protein_coding	NA	NA	2.88635	2.47328	0.018112
AT3G26220	cytochrome P450%2C family 71%2C subfamily B%2C polypeptide 3	protein_coding	cytochrome P450%2C family 71%2C subfamily B%2C polypeptide 3	NA	2.8853	3.13944	0.032149
AT3G19270	cytochrome P450%2C family 707%2C subfamily A%2C polypeptide 4	protein_coding	cytochrome P450%2C family 707%2C subfamily A%2C polypeptide 4	NA	2.87633	2.84466	0.034869
AT1G72680	cinnamyl-alcohol dehydrogenase	protein_coding	cinnamyl-alcohol dehydrogenase	ATCAD1,CINNAMYL ALCOHOL DEHYDROGENASE 1	2.87188	5.17489	0.030316
AT5G01820	serine/threonine protein kinase 1	protein_coding	serine/threonine protein kinase 1	ATCIPK14,ATSR1,serine/threonine protein kinase 1,CIPK14,CBL-INTERACTING PROTEIN KINASE 14,PKS24,SOS2-like protein kinase 24,SnRK3.15,SNF1-RELATED PROTEIN KINASE 3.15	2.84892	5.89296	0.023677
AT4G30460	glycine-rich protein	protein_coding	NA	NA	2.84599	3.93525	0.023414
AT1G78290	Protein kinase superfamily protein	protein_coding	SNF1-RELATED PROTEIN KINASE 2-8	SNRK2.8,SNF1-RELATED PROTEIN KINASE 2.8,SRK2C,SNF1-RELATED PROTEIN KINASE 2C	2.84298	3.27113	0.011416
AT5G48530	hypothetical protein	protein_coding	NA	NA	2.84121	3.00396	0.043147
AT4G33420	Peroxidase superfamily protein	protein_coding	NA	NA	2.81594	1.28068	0.047084
AT1G09480	NAD(P)-binding Rossmann-fold superfamily protein	protein_coding	NA	NA	2.81224	0.303484	0.021978
AT5G07340	Calreticulin family protein	protein_coding	NA	NA	2.80735	6.64946	0.021063
AT1G55530	RING/U-box superfamily protein	protein_coding	NA	NA	2.8026	5.95654	0.023558
AT1G67365	Natural antisense transcript overlaps with AT1G67370	antisense_long_noncoding_rna	NA	NA	2.7899	2.21356	0.025622
AT4G08230	glycine-rich protein	protein_coding	NA	NA	2.78664	5.80166	0.004842
AT1G35660	erythroid differentiation factor-like protein	protein_coding	NA	NA	2.78083	5.20075	0.009761
AT1G22190	Integrase-type DNA-binding superfamily protein	protein_coding	NA	RAP2.4,related to AP2 4	2.77841	4.52241	0.018112
AT5G43620	Pre-mRNA cleavage complex II	protein_coding	NA	NA	2.77689	3.02213	0.039588
AT3G51980	ARM repeat superfamily protein	protein_coding	NA	NA	2.77533	6.08304	0.008367
AT4G06410	Natural antisense transcript overlaps with AT4G16670	antisense_long_noncoding_rna	NA	NA	2.7752	1.52804	0.014601
AT2G27500	Glycosyl hydrolase superfamily protein	protein_coding	NA	NA	2.77174	4.5	0.031185
AT1G09070	soybean gene regulated by cold-2	protein_coding	soybean gene regulated by cold-2	(AT)SRC2,SOYBEAN GENE REGULATED BY COLD-2,AtSRC2	2.76334	7.8213	0.032149
AT1G02390	glycerol-3-phosphate acyltransferase 2	protein_coding	GLYCEROL-3-PHOSPHATE sn-2-ACYLTRANSFERASE 2	ATGPAT2,GLYCEROL-3-PHOSPHATE sn-2-ACYLTRANSFERASE 2	2.76154	3.06069	0.020172
AT2G41160	Ubiquitin-associated (UBA) protein	protein_coding	NA	NA	2.76013	5.51278	0.011421
AT2G37760	NAD(P)-linked oxidoreductase superfamily protein	protein_coding	Aldo-keto reductase family 4 member C8	NA	2.75147	5.68031	0.037669
AT4G08950	Phosphate-responsive 1 family protein	protein_coding	EXORDIUM	NA	2.73195	2.79431	0.034692
AT3G26230	cytochrome P450%2C family 71%2C subfamily B%2C polypeptide 24	protein_coding	cytochrome P450%2C family 71%2C subfamily B%2C polypeptide 24	NA	2.72736	3.09569	0.019219
AT1G67520	lectin protein kinase family protein	protein_coding	NA	NA	2.72077	2.12304	0.025014
AT1G10040	alpha/beta-Hydrolases superfamily protein	protein_coding	NA	NA	2.72013	2.10593	0.045542
AT1G73066	Leucine-rich repeat family protein	protein_coding	NA	NA	2.71201	1.65816	0.031557
AT5G22860	Serine carboxypeptidase S28 family protein	protein_coding	NA	NA	2.70544	4.83475	0.014278
AT5G04840	bZIP protein	protein_coding	NA	NA	2.69848	3.40901	0.049209
AT1G10140	Uncharacterized conserved protein UCP031279	protein_coding	NA	NA	2.6974	1.9991	0.033639
AT2G41070	Basic-leucine zipper (bZIP) transcription factor family protein	protein_coding	ENHANCED EM LEVEL	ATBZIP12,DPBF4	2.69626	1.02143	0.01682
AT3G11080	receptor like protein 35	protein_coding	receptor like protein 35	AtRLP35,receptor like protein 35	2.69511	2.2117	0.008922
AT1G73480	alpha/beta-Hydrolases superfamily protein	protein_coding	NA	NA	2.69455	6.86526	0.027041
AT1G04770	Tetratricopeptide repeat (TPR)-like superfamily protein	protein_coding	NA	NA	2.6944	3.32246	0.036056
AT5G58120	Disease resistance protein (TIR-NBS-LRR class) family	protein_coding	NA	NA	2.69318	3.82717	0.010588
AT3G60415	phosphoglycerate mutase family protein	protein_coding	NA	NA	2.69224	5.46153	0.031557
AT1G21750	PDI-like 1-1	protein_coding	PDI-like 1-1	ATPDI5,ARABIDOPSIS THALIANA PROTEIN DISULFIDE ISOMERASE 5,ATPDIL1-1,PDI-like 1-1,PDI5,PROTEIN DISULFIDE ISOMERASE 5	2.68566	8.3655	0.01623
AT4G26990	polyadenylate-binding protein interacting protein	protein_coding	NA	NA	2.68327	3.09753	0.022824
AT4G31405	hypothetical protein	protein_coding	NA	NA	2.68322	1.93537	0.016645
AT2G23810	tetraspanin8	protein_coding	tetraspanin8	NA	2.67792	6.06262	0.04232
AT1G31280	Argonaute family protein	protein_coding	argonaute 2	AtAGO2	2.67746	6.19021	0.023519
AT2G21188	other_RNA	other_rna	NA	NA	2.677	0.238478	0.025014
AT5G50460	secE/sec61-gamma protein transport protein	protein_coding	NA	NA	2.66465	6.37003	0.008333
AT1G79920	Heat shock protein 70 (Hsp 70) family protein	protein_coding	heat shock protein 70-15	AtHsp70-15	2.6586	9.14983	0.009965
AT5G66620	DA1-related protein 6	protein_coding	DA1-related protein 6	NA	2.64793	3.96019	0.047231
AT1G29310	SecY protein transport family protein	protein_coding	NA	NA	2.64528	5.91732	0.014021
AT3G03310	lecithin:cholesterol acyltransferase 3	protein_coding	lecithin:cholesterol acyltransferase 3	ATLCAT3,ARABIDOPSIS LECITHIN:CHOLESTEROL ACYLTRANSFERASE 3	2.64154	3.96826	0.004842
AT1G72770	HYPERSENSITIVE TO ABA1	protein_coding	HYPERSENSITIVE TO ABA1	AtHAB1	2.63663	5.50692	0.032267
AT5G26660	myb domain protein 86	protein_coding	myb domain protein 86	ATMYB86,myb domain protein 86	2.63262	-0.37582	0.018483
AT3G57880	Calcium-dependent lipid-binding (CaLB domain) plant phosphoribosyltransferase family protein	protein_coding	NA	NA	2.63213	5.65626	0.020263
AT1G56440	Tetratricopeptide repeat (TPR)-like superfamily protein	protein_coding	tetratricopeptide repeat 5	NA	2.62715	4.75996	0.006719
AT2G47470	thioredoxin family protein	protein_coding	UNFERTILIZED EMBRYO SAC 5	ATPDI11,ARABIDOPSIS THALIANA PROTEIN DISULFIDE ISOMERASE 11,ATPDIL2-1,PDI-LIKE 2-1,MEE30,MATERNAL EFFECT EMBRYO ARREST 30,PDI11,PROTEIN DISULFIDE ISOMERASE 11	2.62157	7.98076	0.010557
AT4G13920	receptor like protein 50	protein_coding	receptor like protein 50	AtRLP50,receptor like protein 50	2.62059	3.2331	0.018483
AT5G03285	other_RNA	other_rna	NA	NA	2.61511	3.80827	0.046624
AT2G37970	SOUL heme-binding family protein	protein_coding	NA	NA	2.61219	5.16906	0.015605
AT2G17900	SET domain group 37	protein_coding	SET domain group 37	ASHR1,ASH1-related 1	2.60505	3.30601	0.016094
AT5G22300	nitrilase 4	protein_coding	nitrilase 4	AtNIT4,NITRILASE 4	2.60367	3.70206	0.045416
AT5G17380	Thiamine pyrophosphate dependent pyruvate decarboxylase family protein	protein_coding	NA	NA	2.60118	6.87313	0.036989
AT2G30480	hypothetical protein	protein_coding	NA	NA	2.60113	3.30826	0.00788
AT5G47830	hypothetical protein	protein_coding	NA	NA	2.5965	4.46786	0.031181
AT2G28210	alpha carbonic anhydrase 2	protein_coding	alpha carbonic anhydrase 2	ATACA2,alpha carbonic anhydrase 2	2.59588	3.38297	0.046624
AT3G13020	hAT transposon superfamily protein	protein_coding	NA	NA	2.58995	0.796865	0.013424
AT5G45380	urea-proton symporter DEGRADATION OF UREA 3 (DUR3)	protein_coding	DEGRADATION OF UREA 3	ATDUR3	2.58126	4.05778	0.04779
AT4G36040	Chaperone DnaJ-domain superfamily protein	protein_coding	DnaJ11	DJC23,DNA J protein C23	2.58086	6.53775	0.038759
AT2G08730	Natural antisense transcript overlaps with AT2G35420	antisense_long_noncoding_rna	NA	NA	2.57788	1.24126	0.012617
AT4G15248	B-box type zinc finger family protein	protein_coding	B-box domain protein 30	NA	2.57187	0.313729	0.021521
AT4G09150	T-complex protein 11	protein_coding	NA	NA	2.56494	7.56116	0.035186
AT3G09520	exocyst subunit exo70 family protein H4	protein_coding	exocyst subunit exo70 family protein H4	ATEXO70H4,exocyst subunit exo70 family protein H4	2.56085	2.80115	0.017314
AT1G74710	ADC synthase superfamily protein	protein_coding	ENHANCED DISEASE SUSCEPTIBILITY TO ERYSIPHE ORONTII 16	ATICS1,ARABIDOPSIS ISOCHORISMATE SYNTHASE 1,ICS1,ISOCHORISMATE SYNTHASE 1,SID2,SALICYLIC ACID INDUCTION DEFICIENT 2	2.55868	4.70473	0.013106
AT5G54470	B-box type zinc finger family protein	protein_coding	B-box domain protein 29	NA	2.55786	2.14078	0.038289
AT1G23710	hypothetical protein (DUF1645)	protein_coding	NA	NA	2.55666	2.88231	0.037691
AT2G38820	DNA-directed RNA polymerase subunit beta-beta protein%2C putative (DUF506)	protein_coding	NA	NA	2.54846	3.46903	0.033548
AT1G64500	Glutaredoxin family protein	protein_coding	NA	NA	2.5429	3.83595	0.041152
AT5G17760	P-loop containing nucleoside triphosphate hydrolases superfamily protein	protein_coding	NA	NA	2.5415	5.2733	0.031137
AT3G09450	fusaric acid resistance family protein	protein_coding	NA	NA	2.53936	2.75907	0.009931
AT5G15450	casein lytic proteinase B3	protein_coding	casein lytic proteinase B3	APG6,ALBINO AND PALE GREEN 6,AtCLPB3,CLPB-P,CASEIN LYTIC PROTEINASE B-P	2.53016	7.92562	0.035943
AT4G21810	DERLIN-2.1	protein_coding	DERLIN-2.1	NA	2.52272	5.75072	0.009761
AT1G75170	Sec14p-like phosphatidylinositol transfer family protein	protein_coding	NA	NA	2.51848	3.81908	0.018112
AT1G21410	F-box/RNI-like superfamily protein	protein_coding	NA	NA	2.51743	4.1401	0.010762
AT4G38060	hypothetical protein	protein_coding	NA	CCI2,Clavata complex interactor 2	2.51537	4.00041	0.009965
AT4G10040	cytochrome c-2	protein_coding	cytochrome c-2	NA	2.50319	5.50627	0.009736
AT1G23550	similar to RCD one 2	protein_coding	similar to RCD one 2	NA	2.50312	2.31497	0.020908
AT1G79520	Cation efflux family protein	protein_coding	NA	NA	2.49881	4.70478	0.026539
AT1G55850	cellulose synthase like E1	protein_coding	cellulose synthase like E1	ATCSLE1	2.48977	5.56606	0.044684
AT1G08973	Natural antisense transcript overlaps with AT1G68290	antisense_long_noncoding_rna	NA	NA	2.48934	2.09715	0.043437
AT5G54170	Polyketide cyclase/dehydrase and lipid transport superfamily protein	protein_coding	NA	NA	2.48529	6.48946	0.029987
AT3G06520	agenet domain-containing protein	protein_coding	NA	NA	2.48111	1.85136	0.037691
AT4G04020	fibrillin	protein_coding	fibrillin	FIB1a,fibrillin 1a,PGL35,plastoglobulin 35	2.47181	10.3664	0.010588
AT2G02710	PAS/LOV protein B	protein_coding	PAS/LOV protein B	PLPA,PAS/LOV PROTEIN A,PLPC,PAS/LOV PROTEIN C,PLP,PAS/LOV PROTEIN	2.46982	5.07736	0.046843
AT2G15080	receptor like protein 19	protein_coding	receptor like protein 19	AtRLP19,receptor like protein 19	2.46939	4.84331	0.013106
AT3G29810	COBRA-like protein 2 precursor	protein_coding	COBRA-like protein 2 precursor	NA	2.45476	2.88287	0.044552
AT1G64563	other_RNA	other_rna	NA	NA	2.45154	1.68491	0.020986
AT1G42990	basic region/leucine zipper motif 60	protein_coding	basic region/leucine zipper motif 60	ATBZIP60,basic region/leucine zipper motif 60	2.44946	5.77944	0.014819
AT4G30450	glycine-rich protein	protein_coding	NA	NA	2.44852	3.23154	0.026611
AT3G47420	putative glycerol-3-phosphate transporter 1	protein_coding	Glycerol-3-phosphate permease 1	ATPS3,phosphate starvation-induced gene 3,AtG3Pp1,Glycerol-3-phosphate permease 1,PS3,phosphate starvation-induced gene 3	2.43565	5.32979	0.047913
AT5G24160	squalene monooxygenase 6	protein_coding	squalene monoxygenase 6	NA	2.43191	5.70954	0.01623
AT3G23990	heat shock protein 60	protein_coding	heat shock protein 60	NA	2.41302	8.10783	0.008234
AT2G25450	2-oxoglutarate (2OG) and Fe(II)-dependent oxygenase superfamily protein	protein_coding	NA	NA	2.41261	8.53571	0.040251
AT1G07823	Natural antisense transcript overlaps with AT1G52580	antisense_long_noncoding_rna	NA	NA	2.41256	0.382185	0.010588
AT2G04030	Chaperone protein htpG family protein	protein_coding	NA	NA	2.41255	9.31004	0.004842
AT2G45210	SAUR-like auxin-responsive protein family	protein_coding	SMALL AUXIN UPREGULATED 36	SAG201,senescence-associated gene 201	2.41103	0.366551	0.048971
AT1G69570	Dof-type zinc finger DNA-binding family protein	protein_coding	NA	NA	2.40353	1.70594	0.025342
AT2G46940	fold protein	protein_coding	NA	NA	2.40336	1.03538	0.039908
AT3G07770	HEAT SHOCK PROTEIN 89.1	protein_coding	HEAT SHOCK PROTEIN 89.1	AtHsp90-6,HEAT SHOCK PROTEIN 90-6,AtHsp90.6,HEAT SHOCK PROTEIN 90.6	2.40134	7.2574	0.004498
AT3G50920	Phosphatidic acid phosphatase (PAP2) family protein	protein_coding	lipid phosphate phosphatase epsilon 1	NA	2.3816	4.48275	0.014598
AT5G58590	RAN binding protein 1	protein_coding	RAN binding protein 1	NA	2.37804	5.93968	0.00355
AT1G79270	evolutionarily conserved C-terminal region 8	protein_coding	evolutionarily conserved C-terminal region 8	NA	2.37592	5.49822	0.030184
AT2G33580	Protein kinase superfamily protein	protein_coding	LysM-containing receptor-like kinase 5	AtLYK5	2.37381	3.9331	0.049554
AT2G38870	Serine protease inhibitor%2C potato inhibitor I-type family protein	protein_coding	NA	NA	2.36791	5.25953	0.041452
AT3G51440	Calcium-dependent phosphotriesterase superfamily protein	protein_coding	NA	NA	2.36515	3.54803	0.041458
AT5G25120	cytochrome p450%2C family 71%2C subfamily B%2C polypeptide 11	protein_coding	ytochrome p450%2C family 71%2C subfamily B%2C polypeptide 11	NA	2.36443	3.91705	0.013775
AT5G15860	prenylcysteine methylesterase	protein_coding	prenylcysteine methylesterase	ATPCME,prenylcysteine methylesterase,ICME,Isoprenylcysteine methylesterase	2.36194	3.50255	0.020728
AT1G10960	ferredoxin 1	protein_coding	ferredoxin 1	ATFD1,ferredoxin 1	2.36107	9.38173	0.004652
AT5G34940	glucuronidase 3	protein_coding	glucuronidase 3	AtGUS3,glucuronidase 3	2.35968	2.70773	0.04348
AT4G15680	Thioredoxin superfamily protein	protein_coding	NA	NA	2.35559	2.92022	0.015159
AT3G04620	Alba DNA/RNA-binding protein	protein_coding	D NUCLDUO1-ACTIVATEEIC ACID BINDING PROTEIN 1	NA	2.35044	0.377436	0.034302
AT3G46600	GRAS family transcription factor	protein_coding	NA	NA	2.34777	5.1701	0.031804
AT5G52810	NAD(P)-binding Rossmann-fold superfamily protein	protein_coding	NA	NA	2.32335	4.90517	0.035366
AT3G63310	Bax inhibitor-1 family protein	protein_coding	BRZ-INSENSITIVE-LONG HYPOCOTYLS 4	AtLFG2,LFG2,LIFEGUARD 2	2.31535	6.3074	0.02205
AT1G05000	Phosphotyrosine protein phosphatases superfamily protein	NA	NA	NA	2.31327	1.75679	0.015826
AT2G27310	F-box family protein	protein_coding	NA	NA	2.30732	3.34883	0.04779
AT3G17609	HY5-homolog	protein_coding	HY5-homolog	NA	2.30377	3.20997	0.021978
AT1G21900	emp24/gp25L/p24 family/GOLD family protein	protein_coding	p24 subfamily delta 5	NA	2.29835	5.42799	0.011357
AT2G47730	glutathione S-transferase phi 8	protein_coding	glutathione S-transferase phi 8	ATGSTF5,GLUTATHIONE S-TRANSFERASE (CLASS PHI) 5,ATGSTF8,Arabidopsis thaliana glutathione S-transferase phi 8,GST6	2.29721	9.79533	0.034243
AT1G64200	vacuolar H+-ATPase subunit E isoform 3	protein_coding	vacuolar H+-ATPase subunit E isoform 3	NA	2.29667	6.74151	0.033285
AT1G14980	chaperonin 10	protein_coding	chaperonin 10	NA	2.29555	7.22576	0.0042
AT5G47420	Tryptophan RNA-binding attenuator protein-like protein	protein_coding	NA	NA	2.29454	4.95758	0.004842
AT4G00940	Dof-type zinc finger DNA-binding family protein	protein_coding	NA	AtDOF4.1,DOF4.1,DNA binding with one finger 4.1,ITD1,INTERCELLULAR TRAFFICKING DOF 1	2.29107	1.72393	0.031094
AT2G37060	nuclear factor Y%2C subunit B8	protein_coding	nuclear factor Y%2C subunit B8	NA	2.28627	2.35814	0.007244
AT4G15530	pyruvate orthophosphate dikinase	protein_coding	pyruvate orthophosphate dikinase	NA	2.27387	6.28418	0.018518
AT4G37430	cytochrome P450%2C family 91%2C subfamily A%2C polypeptide 2	protein_coding	cytochrome P450%2C family 91%2C subfamily A%2C polypeptide 2	CYP81F1,CYTOCHROME P450 MONOOXYGENASE 81F1	2.27221	3.47141	0.033548
AT2G03120	signal peptide peptidase	protein_coding	signal peptide peptidase	ATSPP,signal peptide peptidase	2.27082	6.53539	0.009931
AT2G44660	ALG6%2C ALG8 glycosyltransferase family	protein_coding	NA	NA	2.26714	4.16432	0.006186
AT1G48320	Thioesterase superfamily protein	protein_coding	DHNA-CoA thioesterase 1	NA	2.25391	2.86326	0.011886
AT1G15430	hypothetical protein (DUF1644)	protein_coding	NA	NA	2.24995	3.4919	0.039908
AT3G44190	FAD/NAD(P)-binding oxidoreductase family protein	protein_coding	NA	NA	2.2464	5.33002	0.033951
AT5G23480	SWIB/MDM2%2C Plus-3 and GYF domain-containing protein	protein_coding	NA	NA	2.23291	3.98566	0.021978
AT1G29690	MAC/Perforin domain-containing protein	protein_coding	constitutively activated cell death 1	NSL2,necrotic spotted lesion 2	2.23072	4.7567	0.045416
AT2G33590	NAD(P)-binding Rossmann-fold superfamily protein	protein_coding	CCR(Cinnamoyl coA:NADP oxidoreductase)-like 1	AtCRL1	2.22937	5.80572	0.024008
AT1G09140	SERINE-ARGININE PROTEIN 30	protein_coding	Serine/Arginine-Rich Protein Splicing Factor 30	ATSRP30.1,ATSRP30.2,ATSRP30,SERINE-ARGININE PROTEIN 30,At-SR30,Serine/Arginine-Rich Protein Splicing Factor 30	2.22935	7.48282	0.011887
AT3G13470	TCP-1/cpn60 chaperonin family protein	protein_coding	chaperonin-60beta2	NA	2.22931	9.31983	0.003792
AT1G23040	hydroxyproline-rich glycoprotein family protein	protein_coding	NA	NA	2.22637	2.35499	0.020376
AT3G20100	cytochrome P450%2C family 705%2C subfamily A%2C polypeptide 19	protein_coding	cytochrome P450%2C family 705%2C subfamily A%2C polypeptide 19	NA	2.22193	2.00021	0.016859
AT4G27020	inositol-1%2C4%2C5-trisphosphate 5-phosphatase	protein_coding	NA	NA	2.22143	4.35804	0.011357
AT3G08690	ubiquitin-conjugating enzyme 11	protein_coding	ubiquitin-conjugating enzyme 11	ATUBC11	2.21485	5.60092	0.00355
AT3G47540	Chitinase family protein	protein_coding	NA	NA	2.2131	3.43513	0.009462
AT1G70000	myb-like transcription factor family protein	protein_coding	NA	NA	2.21269	3.12561	0.041986
AT1G77000	RNI-like superfamily protein	protein_coding	NA	NA	2.21185	3.74841	0.01955
AT1G75000	GNS1/SUR4 membrane protein family	protein_coding	NA	NA	2.21027	2.21527	0.014278
AT1G32127	plant viral-response family protein	protein_coding	NA	NA	2.20832	2.09836	0.019032
AT3G13910	hypothetical protein (DUF3511)	protein_coding	NA	NA	2.20499	3.49539	0.040743
AT1G31820	Amino acid permease family protein	protein_coding	POLYAMINE UPTAKE TRANSPORTER 1	NA	2.2046	2.61765	0.042699
AT2G36460	Aldolase superfamily protein	protein_coding	fructose-bisphosphate aldolase 6	NA	2.20266	8.62088	0.017222
AT5G14780	formate dehydrogenase	protein_coding	formate dehydrogenase	AtFDH1	2.2022	7.62045	0.031062
AT3G10985	senescence associated gene 20	protein_coding	senescence associated gene 20	ATWI-12,ARABIDOPSIS THALIANA WOUND-INDUCED PROTEIN 12,WI12,WOUND-INDUCED PROTEIN 12	2.19476	6.90596	0.013513
AT2G44500	O-fucosyltransferase family protein	protein_coding	NA	NA	2.1872	3.62797	0.046624
AT3G52748	other_RNA	other_rna	NA	NA	2.1867	0.832711	0.015149
AT4G37180	Homeodomain-like superfamily protein	protein_coding	NA	NA	2.18594	4.68234	0.011416
AT5G04410	NAC domain containing protein 2	protein_coding	NAC domain containing protein 2	anac078,Arabidopsis NAC domain containing protein 78	2.18542	7.30978	0.011357
AT2G02390	glutathione S-transferase zeta 1	protein_coding	glutathione S-transferase zeta 1	ATGSTZ1,glutathione S-transferase zeta 1,AtMAAI,GST18,GLUTATHIONE S-TRANSFERASE 18,MAAI,maleylacetoacetate isomerase	2.1849	5.71178	0.015561
AT3G44110	DNAJ homologue 3	protein_coding	NA	NA	2.18142	9.45716	0.021339
AT1G18260	HCP-like superfamily protein	protein_coding	EMS-mutagenized bri1 suppressor 5	HRD3A	2.18102	6.24063	0.006186
AT3G59530	Calcium-dependent phosphotriesterase superfamily protein	protein_coding	LESS ADHERENT POLLEN 3	ATLAP3	2.17291	2.42833	0.02099
AT2G30550	alpha/beta-Hydrolases superfamily protein	protein_coding	NA	DALL3,DAD1-Like Lipase 3	2.16451	5.55386	0.01721
AT3G25990	Homeodomain-like superfamily protein	protein_coding	NA	NA	2.15976	0.484997	0.018146
AT3G06500	Plant neutral invertase family protein	protein_coding	alkaline/neutral invertase C	NA	2.15752	7.35235	0.026553
AT5G03380	Heavy metal transport/detoxification superfamily protein	protein_coding	NA	NA	2.15573	6.088	0.02117
AT1G79550	phosphoglycerate kinase	protein_coding	phosphoglycerate kinase	NA	2.15551	9.03439	0.003792
AT4G28290	hypothetical protein	protein_coding	NA	NA	2.14582	1.8518	0.011416
AT2G31560	signal transducer/transcription protein%2C putative (DUF1685)	protein_coding	NA	NA	2.13282	5.41736	0.005693
AT3G02040	senescence-related gene 3	protein_coding	senescence-related gene 3	AtGDPD1,GDPD1,Glycerophosphodiester phosphodiesterase 1	2.12513	3.91272	0.039568
AT3G08590	Phosphoglycerate mutase%2C 2%2C3-bisphosphoglycerate-independent	protein_coding	2%2C3-biphosphoglycerate-independent phosphoglycerate mutase 2	NA	2.12101	7.91821	0.004372
AT1G33110	MATE efflux family protein	protein_coding	NA	NA	2.11381	5.6942	0.04439
AT5G16080	carboxyesterase 17	protein_coding	carboxyesterase 17	AtCXE17,carboxyesterase 17	2.11033	1.46046	0.038636
AT1G55310	SC35-like splicing factor 33	protein_coding	SC35-LIKE SPLICING FACTOR 33	ATSCL33,SC35-like splicing factor 33,At-SCL33,SC35-LIKE SPLICING FACTOR 33,SR33,SC35-like splicing factor 33	2.10559	6.2385	0.009082
AT5G55560	Protein kinase superfamily protein	protein_coding	NA	NA	2.10507	1.12659	0.041188
AT5G46490	Disease resistance protein (TIR-NBS-LRR class) family	protein_coding	NA	NA	2.10507	4.24659	0.007667
AT1G62740	stress-inducible protein	protein_coding	Hop2	NA	2.10445	7.17306	0.01623
AT3G17800	alanine-tRNA ligase%2C putative (DUF760)	protein_coding	NA	NA	2.10441	7.46531	0.007928
AT1G13990	plant/protein	protein_coding	NA	NA	2.10259	6.4856	0.008317
AT4G18050	P-glycoprotein 9	protein_coding	ATP-binding cassette B9	PGP9,P-glycoprotein9	2.10142	3.15971	0.023519
AT1G01940	Cyclophilin-like peptidyl-prolyl cis-trans isomerase family protein	protein_coding	NA	NA	2.0961	4.35547	0.020507
AT5G14640	shaggy-like kinase 13	protein_coding	shaggy-like kinase 13	ATSK13,SHAGGY-LIKE KINASE 13	2.09347	4.35316	0.043869
AT5G67300	myb domain protein r1	protein_coding	myb domain protein r1	ATMYB44,ARABIDOPSIS THALIANA MYB DOMAIN PROTEIN 44,ATMYBR1,MYB44	2.08892	7.14945	0.038759
AT2G44290	Bifunctional inhibitor/lipid-transfer protein/seed storage 2S albumin superfamily protein	protein_coding	NA	NA	2.08709	5.24709	0.036989
AT1G67330	glucuronoxylan 4-O-methyltransferase-like protein (DUF579)	protein_coding	NA	NA	2.08445	1.4804	0.037849
AT1G09740	Adenine nucleotide alpha hydrolases-like superfamily protein	protein_coding	NA	NA	2.08383	3.44801	0.019074
AT1G60960	iron regulated transporter 3	protein_coding	iron regulated transporter 3	ATIRT3,IRON REGULATED TRANSPORTER 3	2.08201	3.50752	0.02619
AT3G51430	Calcium-dependent phosphotriesterase superfamily protein	protein_coding	YELLOW-LEAF-SPECIFIC GENE 2	SSL5,STRICTOSIDINE SYNTHASE-LIKE 5	2.07974	5.38162	0.038759
AT5G03990	FK506-binding-like protein	protein_coding	NA	NA	2.07796	4.21643	0.046823
AT2G29400	type one protein phosphatase 1	protein_coding	type one protein phosphatase 1	PP1-AT,PROTEIN PHOSPHATASE 1	2.07727	6.18269	0.014025
AT3G19970	alpha/beta-Hydrolases superfamily protein	protein_coding	NA	NA	2.07701	4.43727	0.044105
AT4G30500	transmembrane protein (DUF788)	protein_coding	NA	NA	2.07667	3.28727	0.03063
AT1G78380	glutathione S-transferase TAU 19	protein_coding	glutathione S-transferase TAU 19	ATGSTU19,A. THALIANA GLUTATHIONE S-TRANSFERASE TAU 19,GST8,GLUTATHIONE TRANSFERASE 8	2.07634	9.0465	0.031532
AT1G75270	dehydroascorbate reductase 2	protein_coding	dehydroascorbate reductase 2	NA	2.07544	5.30936	0.034169
AT4G23885	hypothetical protein	protein_coding	NA	NA	2.07271	3.68598	0.018587
AT4G39955	alpha/beta-Hydrolases superfamily protein	protein_coding	NA	NA	2.06613	2.56933	0.046624
AT2G18000	TBP-associated factor 14	protein_coding	TBP-associated factor 14	YAF9b,homolog of yeast YAF9 b	2.06387	0.553006	0.039908
AT1G32170	xyloglucan endotransglucosylase/hydrolase 30	protein_coding	xyloglucan endotransglucosylase/hydrolase 30	XTR4,xyloglucan endotransglycosylase 4	2.06334	1.39758	0.035299
AT1G31540	Disease resistance protein (TIR-NBS-LRR class) family	protein_coding	NA	NA	2.06253	5.76193	0.020113
AT3G23260	F-box and associated interaction domains-containing protein	protein_coding	NA	NA	2.0534	0.840917	0.014977
AT1G64950	cytochrome P450%2C family 89%2C subfamily A%2C polypeptide 5	protein_coding	cytochrome P450%2C family 89%2C subfamily A%2C polypeptide 5	NA	2.05293	6.36608	0.024324
AT5G06320	NDR1/HIN1-like 3	protein_coding	NDR1/HIN1-like 3	NA	2.0421	6.87841	0.037218
AT1G74320	Protein kinase superfamily protein	protein_coding	NA	NA	2.03913	5.09916	0.032605
AT5G58070	temperature-induced lipocalin	protein_coding	temperature-induced lipocalin	ATTIL,TEMPERATURE-INDUCED LIPOCALIN	2.0336	8.24152	0.008936
AT3G48310	cytochrome P450%2C family 71%2C subfamily A%2C polypeptide 22	protein_coding	cytochrome P450%2C family 71%2C subfamily A%2C polypeptide 22	NA	2.0321	4.42994	0.005797
AT5G03740	histone deacetylase 2C	protein_coding	histone deacetylase 2C	HDT3,HISTONE DEACETYLASE 3	2.02981	6.31085	0.003998
AT2G38860	Class I glutamine amidotransferase-like superfamily protein	protein_coding	NA	NA	2.02938	5.087	0.034729
AT3G60720	plasmodesmata-located protein 8	protein_coding	plasmodesmata-located protein 8	NA	2.02718	3.36515	0.009761
AT5G47070	Protein kinase superfamily protein	protein_coding	NA	NA	2.02513	4.03983	0.039568
AT2G04160	Subtilisin-like serine endopeptidase family protein	protein_coding	AUXIN-INDUCED IN ROOT CULTURES 3	NA	2.01939	6.16497	0.007886
AT5G54940	Translation initiation factor SUI1 family protein	protein_coding	NA	NA	2.01182	8.96332	0.011886
AT5G65110	acyl-CoA oxidase 2	protein_coding	acyl-CoA oxidase 2	ATACX2	2.00536	5.85317	0.047084
AT1G26690	emp24/gp25L/p24 family/GOLD family protein	protein_coding	NA	NA	2.00315	4.74537	0.011012
AT1G07670	endomembrane-type CA-ATPase 4	protein_coding	endomembrane-type CA-ATPase 4	ATECA4	2.00061	6.64198	0.004821
AT3G17000	ubiquitin-conjugating enzyme 32	protein_coding	ubiquitin-conjugating enzyme 32	NA	1.99676	5.39806	0.008936
AT1G02816	pectinesterase (Protein of unknown function%2C DUF538)	protein_coding	NA	NA	1.99128	3.33479	0.022765
AT5G57910	ribosomal RNA small subunit methyltransferase G	protein_coding	NA	NA	1.9888	3.12665	0.034169
AT2G41905	transmembrane protein	protein_coding	NA	NA	1.98872	0.651753	0.025622
AT5G41400	RING/U-box superfamily protein	protein_coding	NA	NA	1.98554	3.72607	0.029376
AT3G10640	SNF7 family protein	protein_coding	NA	NA	1.98065	4.93874	0.009089
AT2G41490	UDP-glcnac-adolichol phosphate glcnac-1-p-transferase	protein_coding	UDP-glcnac-adolichol phosphate glcnac-1-p-transferase	NA	1.9757	4.60584	0.012656
AT2G21130	Cyclophilin-like peptidyl-prolyl cis-trans isomerase family protein	protein_coding	NA	NA	1.97313	6.57064	0.030815
AT5G19440	NAD(P)-binding Rossmann-fold superfamily protein	protein_coding	NA	NA	1.96812	6.50342	0.040641
AT3G02875	Peptidase M20/M25/M40 family protein	protein_coding	IAA-LEUCINE RESISTANT 1	NA	1.95941	3.74341	0.033007
AT5G14760	L-aspartate oxidase	protein_coding	L-aspartate oxidase	FIN4,FLAGELLIN-INSENSITIVE 4	1.95678	2.58438	0.032149
AT4G24920	secE/sec61-gamma protein transport protein	protein_coding	NA	NA	1.95411	6.53225	0.032149
AT3G10800	Basic-leucine zipper (bZIP) transcription factor family protein	protein_coding	NA	NA	1.95362	5.59832	0.014973
AT5G58710	rotamase CYP 7	protein_coding	rotamase CYP 7	NA	1.95078	6.63854	0.013463
AT5G53970	Tyrosine transaminase family protein	protein_coding	tyrosine aminotransferase 7	NA	1.94406	4.6651	0.02029
AT3G04120	glyceraldehyde-3-phosphate dehydrogenase C subunit 1	protein_coding	glyceraldehyde-3-phosphate dehydrogenase C subunit 1	GAPC-1,GAPC,GLYCERALDEHYDE-3-PHOSPHATE DEHYDROGENASE C SUBUNIT	1.94289	9.98312	0.010508
AT3G49530	NAC domain containing protein 62	protein_coding	NAC domain containing protein 62	ANAC062,NAC domain containing protein 62,NTL6,NTM1 (NAC WITH TRANSMEMBRANE MOTIF 1)-LIKE 6	1.93086	5.06696	0.019567
AT4G25690	stress response NST1-like protein	protein_coding	NA	NA	1.92689	3.87843	0.037849
AT1G65980	thioredoxin-dependent peroxidase 1	protein_coding	thioredoxin-dependent peroxidase 1	NA	1.92599	7.71165	0.004169
AT5G35080	ER lectin-like protein	protein_coding	OS9	AtOS9	1.92572	4.83827	0.011416
AT5G57900	SKP1 interacting partner 1	protein_coding	SKP1 interacting partner 1	NA	1.92547	4.24743	0.022983
AT1G52600	Peptidase S24/S26A/S26B/S26C family protein	protein_coding	NA	NA	1.92145	5.38752	0.014131
AT4G01010	cyclic nucleotide-gated channel 13	protein_coding	cyclic nucleotide-gated channel 13	ATCNGC13,CYCLIC NUCLEOTIDE-GATED CHANNEL 13	1.92088	3.48263	0.038781
AT5G64400	CHCH domain protein	protein_coding	NA	NA	1.91849	8.40596	0.01134
AT3G03470	cytochrome P450%2C family 87%2C subfamily A%2C polypeptide 9	protein_coding	cytochrome P450%2C family 87%2C subfamily A%2C polypeptide 9	NA	1.91719	5.40591	0.046553
AT4G13510	ammonium transporter 1%3B1	protein_coding	ammonium transporter 1%3B1	ATAMT1%3B1,ATAMT1,ARABIDOPSIS THALIANA AMMONIUM TRANSPORT 1	1.91167	7.32149	0.038759
AT1G36370	serine hydroxymethyltransferase 7	protein_coding	serine hydroxymethyltransferase 7	NA	1.90826	4.8826	0.041958
AT1G69730	Wall-associated kinase family protein	protein_coding	NA	NA	1.90624	5.86952	0.030525
AT5G51450	RPM1 interacting protein 3	protein_coding	RPM1 interacting protein 3	NA	1.90598	5.02835	0.040833
AT5G03610	GDSL-like Lipase/Acylhydrolase superfamily protein	protein_coding	NA	NA	1.90596	4.14196	0.036989
AT2G18950	homogentisate phytyltransferase 1	protein_coding	homogentisate phytyltransferase 1	ATHPT,HOMOGENTISATE PHYTYLTRANSFERASE,TPT1,VTE2,VITAMIN E 2	1.90126	5.40543	0.016956
AT1G21400	Thiamin diphosphate-binding fold (THDP-binding) superfamily protein	protein_coding	NA	NA	1.89733	4.67424	0.048722
AT2G47800	multidrug resistance-associated protein 4	protein_coding	ATP-binding cassette C4	ATMRP4,multidrug resistance-associated protein 4,EST3,MRP4,multidrug resistance-associated protein 4	1.89609	5.62454	0.030114
AT4G09750	NAD(P)-binding Rossmann-fold superfamily protein	protein_coding	NA	NA	1.89577	4.01112	0.006111
AT3G03990	alpha/beta-Hydrolases superfamily protein	protein_coding	NA	D14,DWARF 14	1.89432	5.07524	0.042413
AT1G52570	phospholipase D alpha 2	protein_coding	phospholipase D alpha 2	NA	1.8918	2.38544	0.015149
AT2G43150	Proline-rich extensin-like family protein	protein_coding	NA	NA	1.88935	4.78425	0.02425
AT5G03560	Tetratricopeptide repeat (TPR)-like superfamily protein	protein_coding	NA	NA	1.88761	4.31473	0.004842
AT5G39080	HXXXD-type acyl-transferase family protein	protein_coding	NA	NA	1.8864	4.40846	0.048114
AT2G24180	cytochrome p450 71b6	protein_coding	cytochrome p450 71b6	NA	1.88583	6.05864	0.020447
AT3G03030	F-box/RNI-like superfamily protein	protein_coding	NA	NA	1.88216	2.13191	0.028194
AT3G01350	Major facilitator superfamily protein	protein_coding	NA	NA	1.8736	1.79274	0.023677
AT5G04760	Duplicated homeodomain-like superfamily protein	protein_coding	NA	NA	1.87258	3.50204	0.041725
AT2G24680	transcriptional factor B3 family protein	protein_coding	NA	NA	1.87067	1.04634	0.020447
AT5G60270	Concanavalin A-like lectin protein kinase family protein	protein_coding	NA	LecRK-I.7,L-type lectin receptor kinase I.7	1.86733	3.37233	0.02139
AT3G13100	multidrug resistance-associated protein 7	protein_coding	ATP-binding cassette C7	ATMRP7,multidrug resistance-associated protein 7,MRP7,MRP7,multidrug resistance-associated protein 7	1.86691	2.72676	0.026611
AT1G80110	phloem protein 2-B11	protein_coding	phloem protein 2-B11	ATPP2-B11,phloem protein 2-B11	1.86613	2.0626	0.026089
AT4G01200	Calcium-dependent lipid-binding (CaLB domain) family protein	protein_coding	NA	NA	1.86556	0.628838	0.027787
AT3G17770	Dihydroxyacetone kinase	protein_coding	NA	NA	1.86188	5.27813	0.040743
AT5G25140	cytochrome P450%2C family 71%2C subfamily B%2C polypeptide 13	protein_coding	cytochrome P450%2C family 71%2C subfamily B%2C polypeptide 13	NA	1.85914	2.61459	0.018146
AT3G51000	alpha/beta-Hydrolases superfamily protein	protein_coding	NA	NA	1.85783	5.82667	0.009761
AT5G61510	GroES-like zinc-binding alcohol dehydrogenase family protein	protein_coding	NA	NA	1.8568	6.0268	0.01623
AT4G02980	endoplasmic reticulum auxin binding protein 1	protein_coding	endoplasmic reticulum auxin binding protein 1	ABP	1.85292	4.46462	0.003998
AT4G25900	Galactose mutarotase-like superfamily protein	protein_coding	NA	NA	1.85098	5.32544	0.043813
AT1G66510	AAR2 protein family	protein_coding	NA	NA	1.8469	4.19472	0.018884
AT2G29990	alternative NAD(P)H dehydrogenase 2	protein_coding	alternative NAD(P)H dehydrogenase 2	NA	1.8461	3.94142	0.033774
AT5G20830	sucrose synthase 1	protein_coding	sucrose synthase 1	ASUS1,atsus1	1.84358	6.66012	0.038351
AT3G12830	SAUR-like auxin-responsive protein family	protein_coding	NA	SAUR72,SMALL AUXIN UPREGULATED 72	1.84324	2.74962	0.041668
AT1G33560	Disease resistance protein (CC-NBS-LRR class) family	protein_coding	ACTIVATED DISEASE RESISTANCE 1	NA	1.83776	4.80803	0.011012
AT4G29950	Ypt/Rab-GAP domain of gyp1p superfamily protein	protein_coding	NA	NA	1.83524	5.90602	0.014144
AT5G24660	response to low sulfur 2	protein_coding	RESPONSE TO LOW SULFUR 2	NA	1.82882	4.02203	0.040749
AT2G04400	Aldolase-type TIM barrel family protein	protein_coding	NA	NA	1.82476	6.15183	0.03224
AT5G25820	Exostosin family protein	protein_coding	NA	NA	1.82194	0.457106	0.043774
AT4G10330	glycine-rich protein	protein_coding	NA	NA	1.82191	3.0585	0.028271
AT5G66070	RING/U-box superfamily protein	protein_coding	NA	NA	1.82123	3.84422	0.029714
AT2G28710	C2H2-type zinc finger family protein	protein_coding	NA	NA	1.81645	0.654291	0.031983
AT5G02500	heat shock cognate protein 70-1	protein_coding	heat shock cognate protein 70-1	AT-HSC70-1,ARABIDOPSIS THALIANA HEAT SHOCK COGNATE PROTEIN 70-1,AtHsp70-1,HSC70,HEAT SHOCK COGNATE PROTEIN 70,HSP70-1,HEAT SHOCK PROTEIN 70-1	1.81001	12.0758	0.01721
AT3G55470	Calcium-dependent lipid-binding (CaLB domain) family protein	protein_coding	NA	NA	1.80187	2.94575	0.040948
AT1G74875	F-box protein	protein_coding	NA	NA	1.80157	1.50763	0.048971
AT1G50740	Transmembrane proteins 14C	protein_coding	NA	NA	1.79897	3.85646	0.02574
AT4G37790	Homeobox-leucine zipper protein family	protein_coding	NA	NA	1.79598	4.26443	0.008367
AT1G31485	Natural antisense transcript overlaps with AT1G31490	antisense_long_noncoding_rna	NA	NA	1.79533	0.147491	0.038382
AT4G14430	indole-3-butyric acid response 10	protein_coding	indole-3-butyric acid response 10	ATECI2,ARABIDOPSIS THALIANA DELTA(3), DELTA(2)-ENOYL COA ISOMERASE 2,ECHIB,ENOYL-COA HYDRATASE/ISOMERASE B,ECI2,DELTA(3), DELTA(2)-ENOYL COA ISOMERASE 2,PEC12	1.79253	5.66415	0.007244
AT1G62422	hypothetical protein	protein_coding	NA	NA	1.78969	2.32275	0.031984
AT3G13310	Chaperone DnaJ-domain superfamily protein	protein_coding	NA	DJC66,DNA J protein C66	1.78493	4.74057	0.026045
AT1G42480	TLR4 regulator/MIR-interacting MSAP protein	protein_coding	NA	NA	1.78188	4.43581	0.025342
AT4G15670	Thioredoxin superfamily protein	protein_coding	NA	NA	1.78129	2.36576	0.015149
AT1G29150	non-ATPase subunit 9	protein_coding	non-ATPase subunit 9	RPN6,REGULATORY PARTICLE NON-ATPASE 6	1.7751	7.67559	0.007386
AT1G72930	toll/interleukin-1 receptor-like protein	protein_coding	toll/interleukin-1 receptor-like	AtTN10,TN10,TIR-nucleotide binding site family 10	1.77399	6.31043	0.043869
AT3G26320	cytochrome P450%2C family 71%2C subfamily B%2C polypeptide 36	protein_coding	cytochrome P450%2C family 71%2C subfamily B%2C polypeptide 36	NA	1.77346	1.89317	0.045581
AT3G54640	tryptophan synthase alpha chain	protein_coding	tryptophan synthase alpha chain	TRP3,TRYPTOPHAN-REQUIRING 3	1.77316	6.19792	0.021521
AT2G44080	ARGOS-like protein	protein_coding	ARGOS-like	NA	1.76377	0.429615	0.027267
AT5G59920	Cysteine/Histidine-rich C1 domain family protein	protein_coding	UV-B LIGHT INSENSITIVE 3	NA	1.76053	4.17301	0.032726
AT2G45920	U-box domain-containing protein	protein_coding	NA	NA	1.75742	3.62456	0.013804
AT5G11520	aspartate aminotransferase 3	protein_coding	aspartate aminotransferase 3	YLS4,YELLOW-LEAF-SPECIFIC GENE 4	1.75728	7.01147	0.024008
AT4G29960	transmembrane protein	protein_coding	NA	NA	1.75614	4.83304	0.008187
AT4G15700	Thioredoxin superfamily protein	protein_coding	NA	NA	1.75167	2.8792	0.018575
AT3G14050	RELA/SPOT homolog 2	protein_coding	RELA/SPOT homolog 2	AT-RSH2,RELA-SPOT HOMOLOG 2,ATRSH2,RELA/SPOT HOMOLOG 2	1.74887	5.16915	0.048704
AT4G02890	Ubiquitin family protein	protein_coding	NA	NA	1.74841	8.56894	0.031532
AT2G17730	NEP-interacting protein 2	protein_coding	NEP-interacting protein 2	NA	1.74524	3.60765	0.005693
AT1G16260	Wall-associated kinase family protein	protein_coding	NA	NA	1.74283	4.60071	0.014841
AT1G22930	T-complex protein 11	protein_coding	NA	NA	1.73893	7.13996	0.008936
AT3G04615	Natural antisense transcript overlaps with AT3G24020	antisense_long_noncoding_rna	NA	NA	1.72874	0.848301	0.040749
AT1G07890	ascorbate peroxidase 1	protein_coding	ascorbate peroxidase 1	ATAPX01,ATAPX1,CS1,MEE6,maternal effect embryo arrest 6	1.72741	10.596	0.017002
AT4G21180	DnaJ / Sec63 Brl domains-containing protein	protein_coding	NA	NA	1.72712	5.7067	0.040926
AT5G51070	Clp ATPase	protein_coding	EARLY RESPONSIVE TO DEHYDRATION 1	CLPD,SAG15,SENESCENCE ASSOCIATED GENE 15	1.72206	8.55768	0.04779
AT1G01715	hypothetical protein	protein_coding	NA	NA	1.71969	1.76871	0.038527
AT1G70780	hypothetical protein	protein_coding	NA	NA	1.71903	7.09832	0.008054
AT4G15660	Thioredoxin superfamily protein	protein_coding	NA	NA	1.71763	3.33584	0.018483
AT4G14420	HR-like lesion-inducing protein-like protein	protein_coding	NA	NA	1.71219	5.92959	0.01623
AT4G27830	beta glucosidase 10	protein_coding	beta glucosidase 10	AtBGLU10	1.71204	5.64545	0.035463
AT1G10050	glycosyl hydrolase family 10 protein / carbohydrate-binding domain-containing protein	protein_coding	NA	NA	1.71057	4.90822	0.032475
AT5G63160	BTB and TAZ domain protein 1	protein_coding	BTB and TAZ domain protein 1	NA	1.71002	5.76015	0.036925
AT1G07590	Tetratricopeptide repeat (TPR)-like superfamily protein	protein_coding	NA	NA	1.70642	7.41738	0.025014
AT3G17810	pyrimidine 1	protein_coding	pyrimidine 1	NA	1.70603	6.16332	0.014799
AT4G26780	Co-chaperone GrpE family protein	protein_coding	NA	NA	1.7037	4.94425	0.013804
AT3G16910	acyl-activating enzyme 7	protein_coding	acyl-activating enzyme 7	ACN1,ACETATE NON-UTILIZING 1	1.70264	6.54509	0.008333
AT5G49910	chloroplast heat shock protein 70-2	protein_coding	chloroplast heat shock protein 70-2	HSC70-7,HEAT SHOCK PROTEIN 70-7	1.70142	9.59257	0.014278
AT5G16370	acyl activating enzyme 5	protein_coding	acyl activating enzyme 5	NA	1.69816	4.14066	0.039568
AT1G62730	Terpenoid synthases superfamily protein	protein_coding	NA	NA	1.69705	2.66672	0.021339
AT3G22370	alternative oxidase 1A	protein_coding	alternative oxidase 1A	ATAOX1A,AtHSR3,HSR3,hyper-sensitivity-related 3	1.69674	6.72916	0.036111
AT1G53280	Class I glutamine amidotransferase-like superfamily protein	protein_coding	DJ-1 homolog B	AtDJ1B,DJ-1 homolog B,DJ-1b	1.68863	6.16694	0.013297
AT3G53670	hypothetical protein	protein_coding	NA	NA	1.68778	5.49871	0.026615
AT5G46180	ornithine-delta-aminotransferase	protein_coding	ornithine-delta-aminotransferase	NA	1.68343	5.44985	0.01682
AT2G02350	SKP1 interacting partner 3	protein_coding	SKP1 interacting partner 3	AtPP2-B9,Phloem protein 2-B9	1.67828	1.15518	0.011012
AT5G11650	alpha/beta-Hydrolases superfamily protein	protein_coding	NA	NA	1.67661	4.56296	0.022845
AT2G21430	Papain family cysteine protease	protein_coding	NA	NA	1.67563	1.30591	0.035255
AT5G02430	Transducin/WD40 repeat-like superfamily protein	protein_coding	NA	NA	1.67222	3.59978	0.019447
AT5G20910	RING/U-box superfamily protein	protein_coding	ABI3-interacting protein 2	NA	1.6693	4.4347	0.026611
AT3G62420	basic region/leucine zipper motif 53	protein_coding	basic region/leucine zipper motif 53	ATBZIP53,basic region/leucine zipper motif 53	1.66914	4.99375	0.044684
AT3G51660	Tautomerase/MIF superfamily protein	protein_coding	NA	NA	1.66743	4.4446	0.04779
AT4G27940	manganese tracking factor for mitochondrial SOD2	protein_coding	manganese tracking factor for mitochondrial SOD2	ATMTM1,ARABIDOPSIS MANGANESE TRACKING FACTOR FOR MITOCHONDRIAL SOD2	1.66519	3.72234	0.03443
AT1G27100	Actin cross-linking protein	protein_coding	NA	NA	1.66464	5.11515	0.031137
AT5G03340	ATPase%2C AAA-type%2C CDC48 protein	protein_coding	cell division cycle 48C	NA	1.65375	6.11384	0.021819
AT5G20000	AAA-type ATPase family protein	protein_coding	NA	NA	1.64741	5.9694	0.024571
AT1G04130	Tetratricopeptide repeat (TPR)-like superfamily protein	protein_coding	tetratricopeptide repeat 2	AtTPR2	1.64714	4.61547	0.035523
AT2G04795	hypothetical protein	protein_coding	NA	NA	1.64688	0.718431	0.03547
AT4G11220	VIRB2-interacting protein 2	protein_coding	VIRB2-interacting protein 2	RTNLB2,Reticulan like protein B2	1.64583	6.26114	0.02205
AT1G55300	TBP-associated factor 7	protein_coding	TBP-associated factor 7	NA	1.64551	3.34827	0.014601
AT5G56750	N-MYC downregulated-like 1	protein_coding	N-MYC downregulated-like 1	NA	1.64445	4.38158	0.032707
AT4G22240	Plastid-lipid associated protein PAP / fibrillin family protein	protein_coding	NA	FBN1b,fibrillin 1b	1.63816	7.96504	0.024008
AT5G37340	ZPR1 zinc-finger domain protein	protein_coding	NA	NA	1.63159	3.27313	0.039568
AT4G34180	Cyclase family protein	protein_coding	NA	NA	1.63123	6.39256	0.029641
AT2G34250	SecY protein transport family protein	protein_coding	NA	NA	1.62629	8.62968	0.018483
AT1G67960	POLLEN DEFECTIVE IN GUIDANCE-like protein	protein_coding	POLLEN DEFECTIVE IN GUIDANCE 1	NA	1.62497	4.56953	0.010588
AT4G09460	myb domain protein 6	protein_coding	myb domain protein 6	AtMYB6,myb domain protein 6	1.62308	2.17653	0.024316
AT4G37310	cytochrome P450%2C family 81%2C subfamily H%2C polypeptide 1	protein_coding	cytochrome P450%2C family 81%2C subfamily H%2C polypeptide 1	NA	1.62258	4.91672	0.01623
AT1G57820	Zinc finger (C3HC4-type RING finger) family protein	protein_coding	VARIANT IN METHYLATION 1	ORTH2,ORTHRUS 2	1.62185	4.15242	0.008086
AT1G25550	myb-like transcription factor family protein	protein_coding	NA	NA	1.62145	4.90251	0.047913
AT2G23450	Protein kinase superfamily protein	protein_coding	NA	NA	1.61705	5.01228	0.041187
AT5G64700	nodulin MtN21 /EamA-like transporter family protein	protein_coding	Usually multiple acids move in and out Transporters 21	NA	1.61668	1.95676	0.048476
AT4G33910	2-oxoglutarate (2OG) and Fe(II)-dependent oxygenase superfamily protein	protein_coding	NA	NA	1.61276	5.11903	0.009026
AT2G25100	Polynucleotidyl transferase%2C ribonuclease H-like superfamily protein	protein_coding	NA	NA	1.61104	3.87538	0.018526
AT1G14010	emp24/gp25L/p24 family/GOLD family protein	protein_coding	NA	NA	1.60452	5.23184	0.030418
AT1G77360	Tetratricopeptide repeat (TPR)-like superfamily protein	protein_coding	Arabidopsis pentatricopeptide repeat 6	NA	1.60361	0.574895	0.01623
AT5G26220	ChaC-like family protein	protein_coding	NA	AtGGCT2%3B1,GGCT2%3B1,gamma-glutamyl cyclotransferase 2%3B1	1.59997	3.35819	0.041527
AT2G18510	RNA-binding (RRM/RBD/RNP motifs) family protein	protein_coding	embryo defective 2444	NA	1.59841	5.40367	0.011012
AT3G10250	histidine-tRNA ligase	protein_coding	NA	NA	1.59793	3.81345	0.016994
AT3G23170	hypothetical protein	protein_coding	NA	NA	1.59392	4.59442	0.046952
AT1G30475	hypothetical protein	protein_coding	NA	NA	1.59146	2.42933	0.045308
AT4G16780	homeobox protein 2	protein_coding	homeobox protein 2	ATHB-2,homeobox protein 2,ATHB2,ARABIDOPSIS THALIANA HOMEOBOX PROTEIN 2,HAT4	1.59007	2.94301	0.013304
AT1G71220	EMS-MUTAGENIZED BRI1 SUPPRESSOR 1	protein_coding	EMS-mutagenized bri1 suppressor 1	PSL2,PRIORITY IN SWEET LIFE 2,UGGT,UDP-GLUCOSE:GLYCOPROTEIN GLUCOSYLTRANSFERASE	1.58616	7.12103	0.011357
AT5G18040	target of trans acting-siR480/255 protein	protein_coding	NA	HTT2,HEAT-INDUCED TAS1 TARGET 2	1.58341	3.82869	0.010588
AT3G09840	cell division cycle 48	protein_coding	cell division cycle 48	ATCDC48,CDC48A	1.58263	9.60059	0.01623
AT5G40760	glucose-6-phosphate dehydrogenase 6	protein_coding	glucose-6-phosphate dehydrogenase 6	NA	1.57844	5.53222	0.039166
AT4G21980	Ubiquitin-like superfamily protein	protein_coding	AUTOPHAGY 8A	ATG8A,AUTOPHAGY-RELATED 8A	1.57688	5.03183	0.011887
AT3G27380	succinate dehydrogenase 2-1	protein_coding	succinate dehydrogenase 2-1	NA	1.57633	6.14316	0.019493
AT4G21580	oxidoreductase%2C zinc-binding dehydrogenase family protein	protein_coding	NA	NA	1.57556	6.0415	0.016136
AT1G65820	microsomal glutathione s-transferase	protein_coding	NA	NA	1.57364	6.75234	0.024332
AT1G56330	secretion-associated RAS 1B	protein_coding	secretion-associated RAS 1B	ATSAR1B,secretion-associated RAS 1B,ATSAR1,SECRETION-ASSOCIATED RAS 1,ATSARA1B,ARABIDOPSIS THALIANA SECRETION-ASSOCIATED RAS 1B,SAR1,SECRETION-ASSOCIATED RAS 1	1.57295	7.20917	0.015605
AT3G05230	Signal peptidase subunit	protein_coding	NA	NA	1.55843	4.25038	0.018857
AT1G56080	interactor of constitutive active ROPs protein	protein_coding	NA	NA	1.5559	0.535019	0.044135
AT2G39050	hydroxyproline-rich glycoprotein family protein	protein_coding	Euonymus lectin S3	ArathEULS3	1.55564	4.86022	0.032178
AT1G12210	RPS5-like 1	protein_coding	RPS5-like 1	NA	1.55532	2.05688	0.035332
AT3G25013	Synaptobrevin family protein	protein_coding	NA	NA	1.55196	2.45209	0.026553
AT5G06750	Protein phosphatase 2C family protein	protein_coding	NA	APD8,Arabidopsis Pp2c clade D 8	1.54803	3.73385	0.032053
AT3G12040	DNA-3-methyladenine glycosylase (MAG)	protein_coding	NA	NA	1.54753	2.08737	0.043351
AT2G41220	glutamate synthase 2	protein_coding	glutamate synthase 2	NA	1.54235	5.55105	0.009965
AT4G03430	pre-mRNA splicing factor-like protein	protein_coding	EMBRYO DEFECTIVE 2770	STA1,STABILIZED 1	1.53988	6.45435	0.046115
AT3G07680	emp24/gp25L/p24 family/GOLD family protein	protein_coding	p24 subfamily beta 2	NA	1.53509	5.95919	0.021092
AT2G46735	death domain associated protein	protein_coding	NA	NA	1.53175	3.73837	0.009383
AT4G01810	Sec23/Sec24 protein transport family protein	protein_coding	NA	NA	1.53154	6.37622	0.011684
AT1G01140	CBL-interacting protein kinase 9	protein_coding	CBL-interacting protein kinase 9	PKS6,PROTEIN KINASE 6,SnRK3.12,SNF1-RELATED PROTEIN KINASE 3.12	1.52985	7.13429	0.009965
AT3G44720	arogenate dehydratase 4	NA	NA	NA	1.52983	5.49842	0.042754
AT4G19520	disease resistance protein (TIR-NBS-LRR class) family	protein_coding	NA	NA	1.5298	5.40343	0.046033
AT5G13420	Aldolase-type TIM barrel family protein	protein_coding	transaldolase 2	NA	1.52894	5.51434	0.018483
AT1G49050	Eukaryotic aspartyl protease family protein	protein_coding	NA	NA	1.52825	5.17612	0.036361
AT5G39030	Protein kinase superfamily protein	protein_coding	NA	NA	1.52819	3.90117	0.016859
AT5G67160	HXXXD-type acyl-transferase family protein	protein_coding	ENHANCED PSEUDOMONAS SUSCEPTIBILTY 1	NA	1.52633	2.37215	0.021715
AT2G46140	Late embryogenesis abundant protein	protein_coding	NA	LEA27,late embryogenesis abundant 27	1.52453	1.96665	0.043943
AT1G77370	Glutaredoxin family protein	protein_coding	NA	NA	1.52427	5.2549	0.02029
AT5G42220	Ubiquitin-like superfamily protein	protein_coding	NA	NA	1.52343	6.46286	0.004842
AT5G56050	late embryogenesis abundant (LEA) hydroxyproline-rich glycoprotein family protein	protein_coding	NA	NA	1.52063	0.445196	0.032605
AT1G33720	cytochrome P450%2C family 76%2C subfamily C%2C polypeptide 6	protein_coding	cytochrome P450%2C family 76%2C subfamily C%2C polypeptide 6	NA	1.52016	2.62665	0.032335
AT4G23250	cysteine-rich receptor-like protein kinase 17	protein_coding	EMBRYO DEFECTIVE 1290	CRK17,CYSTEINE-RICH RLK (RECEPTOR-LIKE PROTEIN KINASE) 17,DUF26-21,RKC1,RECEPTOR-LIKE KINASE THALIANACOL-0GENOMICLIBRARY(CLONTECH).THEPOSITIVEPHAGECLONES C-X8-C-X2-C CLASS 1	1.52008	4.33272	0.04979
AT3G10820	Transcription elongation factor (TFIIS) family protein	protein_coding	NA	NA	1.5124	3.16784	0.02867
AT5G23050	acyl-activating enzyme 17	protein_coding	acyl-activating enzyme 17	NA	1.50874	4.49739	0.034981
AT3G06760	Drought-responsive family protein	protein_coding	NA	NA	1.50757	4.63827	0.022902
AT3G20250	pumilio 5	protein_coding	pumilio 5	APUM5,pumilio 5	1.50398	4.87857	0.049954
AT3G26450	Polyketide cyclase/dehydrase and lipid transport superfamily protein	protein_coding	NA	NA	1.49942	7.5038	0.013513
AT3G56170	Ca-2+ dependent nuclease	protein_coding	Ca-2+ dependent nuclease	CAN1,calcium dependent nuclease 1	1.49789	3.65798	0.021958
AT4G05050	ubiquitin 11	protein_coding	ubiquitin 11	NA	1.49252	9.08933	0.017222
AT2G17220	Protein kinase superfamily protein	protein_coding	kinase 3	NA	1.49165	5.21657	0.01555
AT2G33700	Protein phosphatase 2C family protein	protein_coding	protein phosphatase 2C G Group 1	NA	1.49152	4.16658	0.048217
AT5G57150	basic helix-loop-helix (bHLH) DNA-binding superfamily protein	protein_coding	NA	NA	1.48922	4.38686	0.023889
AT2G45070	Preprotein translocase Sec%2C Sec61-beta subunit protein	protein_coding	SUPPRESSORS OF SECRETION-DEFECTIVE 61 BETA	NA	1.48372	6.83034	0.023235
AT2G22850	basic leucine-zipper 6	protein_coding	basic leucine-zipper 6	AtbZIP6,basic leucine-zipper 6	1.47843	0.842607	0.026611
AT4G22740	glycine-rich protein	protein_coding	NA	NA	1.4777	5.7579	0.020748
AT2G31751	Natural antisense transcript overlaps with AT2G31750	antisense_long_noncoding_rna	NA	NA	1.47762	1.80806	0.043203
AT1G06570	4-hydroxyphenylpyruvate dioxygenase	protein_coding	phytoene desaturation 1	HPD,4-hydroxyphenylpyruvate dioxygenase,HPPD,4-hydroxyphenylpyruvate dioxygenase	1.47095	5.70352	0.033007
AT5G04830	Nuclear transport factor 2 (NTF2) family protein	protein_coding	NA	NA	1.47064	6.28605	0.008054
AT1G80610	hypothetical protein	protein_coding	NA	NA	1.46859	2.70059	0.036056
AT4G22820	A20/AN1-like zinc finger family protein	protein_coding	NA	NA	1.46601	4.83711	0.048653
AT1G23440	Peptidase C15%2C pyroglutamyl peptidase I-like protein	protein_coding	NA	NA	1.46397	5.5899	0.019598
AT5G59960	K-stimulated pyrophosphate-energized sodium pump protein	protein_coding	NA	NA	1.46349	4.43927	0.014971
AT4G09030	arabinogalactan protein 10	protein_coding	arabinogalactan protein 10	ATAGP10	1.46237	3.01206	0.03731
AT3G29240	PPR containing protein (DUF179)	protein_coding	NA	NA	1.45883	6.53657	0.028636
AT1G77145	transmembrane protein%2C putative (DUF506)	protein_coding	NA	NA	1.45694	0.308404	0.046605
AT5G56000	HEAT SHOCK PROTEIN 81.4	protein_coding	HEAT SHOCK PROTEIN 81.4	AtHsp90.4,HEAT SHOCK PROTEIN 90.4	1.45511	6.10465	0.041668
AT2G21940	shikimate kinase 1	protein_coding	shikimate kinase 1	ATSK1	1.4495	4.76298	0.00847
AT3G44880	Pheophorbide a oxygenase family protein with Rieske 2Fe-2S domain-containing protein	protein_coding	ACCELERATED CELL DEATH 1	LLS1,LETHAL LEAF-SPOT 1 HOMOLOG,PAO,PHEOPHORBIDE A OXYGENASE	1.44921	6.82021	0.019347
AT4G17420	Tryptophan RNA-binding attenuator protein-like protein	protein_coding	NA	NA	1.4477	4.31113	0.020352
AT5G54730	yeast autophagy 18 F-like protein	protein_coding	homolog of yeast autophagy 18 (ATG18) F	ATATG18F,ARABIDOPSIS THALIANA HOMOLOG OF YEAST AUTOPHAGY 18 (ATG18) F,ATG18F,homolog of yeast autophagy 18 (ATG18) F	1.44499	4.49455	0.048114
AT1G77890	DNA-directed RNA polymerase II protein	protein_coding	NA	NA	1.4428	3.44809	0.036428
AT1G02090	Proteasome component (PCI) domain protein	protein_coding	FUSCA 5	ATCSN7,ARABIDOPSIS THALIANA COP9 SIGNALOSOME SUBUNIT 7,COP15,CONSTITUTIVE PHOTOMORPHOGENIC 15,CSN7,COP9 SIGNALOSOME SUBUNIT 7	1.43978	5.7017	0.025134
AT4G03960	Phosphotyrosine protein phosphatases superfamily protein	NA	NA	NA	1.43928	3.59985	0.030586
AT1G49710	fucosyltransferase 12	protein_coding	fucosyltransferase 12	ATFUT12,FUCT2,FUCTB	1.43893	4.82203	0.012282
AT1G12420	ACT domain repeat 8	protein_coding	ACT domain repeat 8	NA	1.43591	3.82481	0.036925
AT1G78920	vacuolar H+-pyrophosphatase 2	protein_coding	vacuolar H+-pyrophosphatase 2	AVP2,vacuolar H+-pyrophosphatase 2,AVPL1,VACUOLAR-PYROPHOSPHATASE LIKE PROTEIN 1,AtVHP2%3B1,VHP2%3B1	1.43263	6.99382	0.011012
AT1G53560	Ribosomal protein L18ae family	protein_coding	NA	NA	1.42893	4.38986	0.025225
AT4G01120	G-box binding factor 2	protein_coding	G-box binding factor 2	ATBZIP54,BASIC REGION/LEUCINE ZIPPER MOTIF 5	1.42861	4.17428	0.043147
AT5G59480	Haloacid dehalogenase-like hydrolase (HAD) superfamily protein	protein_coding	NA	NA	1.42793	5.97668	0.043203
AT1G29060	Target SNARE coiled-coil domain protein	protein_coding	NA	AtSFT12	1.42643	3.06788	0.037996
AT5G51740	Peptidase family M48 family protein	protein_coding	NA	NA	1.424	3.99516	0.011357
AT1G12290	Disease resistance protein (CC-NBS-LRR class) family	protein_coding	NA	NA	1.42347	2.16606	0.043351
AT1G02460	Pectin lyase-like superfamily protein	protein_coding	NA	NA	1.42334	3.36135	0.036056
AT2G36580	Pyruvate kinase family protein	protein_coding	NA	NA	1.42275	6.33973	0.049954
AT5G26990	Drought-responsive family protein	protein_coding	NA	NA	1.42231	4.03036	0.018483
AT5G56500	TCP-1/cpn60 chaperonin family protein	protein_coding	chaperonin-60beta3	NA	1.42199	4.66822	0.011421
AT4G33940	RING/U-box superfamily protein	protein_coding	NA	NA	1.42194	4.24053	0.025694
AT5G65210	bZIP transcription factor family protein	protein_coding	TGACG sequence-specific binding protein 1	NA	1.41712	3.41761	0.026354
AT5G23340	RNI-like superfamily protein	protein_coding	NA	NA	1.41244	3.93294	0.046235
AT1G18940	Nodulin-like / Major Facilitator Superfamily protein	protein_coding	NA	NA	1.40867	0.672926	0.041152
AT4G28480	DNAJ heat shock family protein	protein_coding	NA	NA	1.40841	6.1361	0.046624
AT4G23260	cysteine-rich RLK (RECEPTOR-like protein kinase) 18	protein_coding	cysteine-rich RLK (RECEPTOR-like protein kinase) 18	NA	1.40718	5.82291	0.014156
AT4G14270	polyadenylate-binding protein interacting protein	protein_coding	NA	NA	1.40671	6.24606	0.029987
AT1G50590	RmlC-like cupins superfamily protein	protein_coding	NA	NA	1.40583	1.4074	0.047084
AT5G62130	Per1-like family protein	protein_coding	NA	NA	1.40459	4.36171	0.038382
AT1G51340	MATE efflux family protein	protein_coding	NA	NA	1.40062	4.65997	0.011684
AT5G24590	TCV-interacting protein	protein_coding	TCV-interacting protein	ANAC091,Arabidopsis NAC domain containing protein 91	1.39764	4.83478	0.021978
AT1G76080	chloroplastic drought-induced stress protein of 32 kD	protein_coding	chloroplastic drought-induced stress protein of 32 kD	ATCDSP32,ARABIDOPSIS THALIANA CHLOROPLASTIC DROUGHT-INDUCED STRESS PROTEIN OF 32 KD	1.39462	8.53949	0.014748
AT1G18330	Homeodomain-like superfamily protein	protein_coding	EARLY-PHYTOCHROME-RESPONSIVE1	RVE7,REVEILLE 7	1.38991	4.01263	0.008367
AT5G41860	transmembrane protein	protein_coding	NA	NA	1.38973	1.43791	0.046126
AT2G43320	S-adenosyl-L-methionine-dependent methyltransferases superfamily protein	protein_coding	NA	NA	1.38924	3.90342	0.032664
AT1G52590	Putative thiol-disulfide oxidoreductase DCC	protein_coding	NA	NA	1.38799	4.44617	0.025815
AT3G17820	glutamine synthetase 1.3	protein_coding	glutamine synthetase 1.3	ATGSKB6,ARABIDOPSIS THALIANA GLUTAMINE SYNTHASE CLONE KB6	1.38691	4.72969	0.03647
AT3G59280	Protein Transporter%2C Pam16	protein_coding	THAXTOMIN A RESISTANT 1	AtPAM16,MUSE5,mutant, snc1-enhancing 5,PAM16	1.38424	5.43105	0.016026
AT1G27090	glycine-rich protein	protein_coding	NA	NA	1.3809	7.17642	0.026479
AT4G02920	hypothetical protein	protein_coding	NA	NA	1.38003	8.42374	0.021894
AT1G64460	phosphatidylinositol 4-kinase gamma-like protein	protein_coding	NA	NA	1.37628	3.76297	0.024008
AT1G56510	Disease resistance protein (TIR-NBS-LRR class)	protein_coding	WHITE RUST RESISTANCE 4	ADR2,ACTIVATED DISEASE RESISTANCE 2	1.37475	5.68389	0.019032
AT4G29230	NAC domain containing protein 75	protein_coding	NAC domain containing protein 75	anac075,NAC domain containing protein 75	1.37421	1.37649	0.033252
AT5G65380	MATE efflux family protein	protein_coding	NA	NA	1.37145	5.80848	0.043943
AT1G61780	postsynaptic protein-like protein	protein_coding	NA	NA	1.36962	5.06863	0.013513
AT5G17060	ADP-ribosylation factor B1B	protein_coding	ADP-ribosylation factor B1B	ATARFB1B,ADP-ribosylation factor B1B	1.36764	3.80168	0.015149
AT5G08380	alpha-galactosidase 1	protein_coding	alpha-galactosidase 1	AtAGAL1,alpha-galactosidase 1	1.36454	5.48443	0.015425
AT3G26180	cytochrome P450%2C family 71%2C subfamily B%2C polypeptide 20	protein_coding	cytochrome P450%2C family 71%2C subfamily B%2C polypeptide 20	NA	1.36245	5.97264	0.028194
AT4G17900	PLATZ transcription factor family protein	protein_coding	NA	NA	1.36213	4.20829	0.029159
AT1G61790	Oligosaccharyltransferase complex/magnesium transporter family protein	protein_coding	NA	OST3/6,oligosaccharyltransferase subunit 3/6	1.35834	6.29891	0.014021
AT1G17590	nuclear factor Y%2C subunit A8	protein_coding	nuclear factor Y%2C subunit A8	NA	1.35716	2.37474	0.023967
AT2G45790	phosphomannomutase	protein_coding	phosphomannomutase	ATPMM,PHOSPHOMANNOMUTASE	1.35492	6.59837	0.042751
AT5G58110	chaperone binding / ATPase activator	protein_coding	NA	NA	1.35467	5.32637	0.012772
AT1G75810	transmembrane protein	protein_coding	NA	NA	1.35343	3.17576	0.020728
AT5G43850	RmlC-like cupins superfamily protein	protein_coding	NA	NA	1.35211	6.23436	0.043203
AT2G42790	citrate synthase 3	protein_coding	citrate synthase 3	NA	1.34974	6.19594	0.020485
AT2G20940	transmembrane protein%2C putative (DUF1279)	protein_coding	NA	NA	1.34934	3.58027	0.047857
AT3G06860	multifunctional protein 2	protein_coding	multifunctional protein 2	ATMFP2,MULTIFUNCTIONAL PROTEIN 2	1.34705	6.7026	0.010762
AT5G03555	permease%2C cytosine/purines%2C uracil%2C thiamine%2C allantoin family protein	protein_coding	nucleobase cation symporter 1	AtNCS1	1.34541	4.17141	0.025979
AT5G17990	tryptophan biosynthesis 1	protein_coding	tryptophan biosynthesis 1	pat1,PHOSPHORIBOSYLANTHRANILATE TRANSFERASE 1	1.34165	6.70785	0.016645
AT1G65032	COMPLEX 1 LYR-like protein	protein_coding	NA	NA	1.33804	2.05296	0.033252
AT2G36830	gamma tonoplast intrinsic protein	protein_coding	gamma tonoplast intrinsic protein	GAMMA-TIP1,GAMMA TONOPLAST INTRINSIC PROTEIN 1,TIP1%3B1,TONOPLAST INTRINSIC PROTEIN 1%3B1	1.33794	10.2102	0.023889
AT2G46800	zinc transporter	protein_coding	zinc transporter of Arabidopsis thaliana	ATCDF1,A. THALIANA CATION DIFFUSION FACILITATOR 1,ATMTP1,MTP1,metal tolerance protein 1,OZS1,OVERLY ZINC SENSITIVE 1,ZAT1,ZINC TRANSPORTER OF ARABIDOPSIS THALIANA 1	1.33767	4.88248	0.021978
AT3G48320	cytochrome P450%2C family 71%2C subfamily A%2C polypeptide 21	protein_coding	cytochrome P450%2C family 71%2C subfamily A%2C polypeptide 21	NA	1.33693	4.24977	0.01682
AT1G23180	ARM repeat superfamily protein	protein_coding	NA	NA	1.33613	6.07233	0.018199
AT3G06810	acyl-CoA dehydrogenase-like protein	NA	NA	NA	1.33532	5.8959	0.041127
AT2G29340	NAD-dependent epimerase/dehydratase family protein	protein_coding	NA	NA	1.33333	4.77427	0.021362
AT1G58180	beta carbonic anhydrase 6	protein_coding	beta carbonic anhydrase 6	ATBCA6,A. THALIANA BETA CARBONIC ANHYDRASE 6	1.32719	4.3487	0.014278
AT1G16040	phosphatidylinositol-glycan biosynthesis class F-like protein	protein_coding	NA	NA	1.32456	3.39306	0.012378
AT5G53830	VQ motif-containing protein	protein_coding	NA	MVQ3,MPK3/6-targeted VQP 3	1.32374	1.85666	0.02557
AT5G63500	transmembrane protein%2C putative (DUF 3339)	protein_coding	NA	NA	1.32373	2.97704	0.012058
AT5G27430	Signal peptidase subunit	protein_coding	NA	NA	1.32138	4.68978	0.015213
AT5G39950	thioredoxin 2	protein_coding	thioredoxin 2	ATH2,Arabidopsis thioredoxin h2,ATTRX2,thioredoxin 2,ATTRXH2,TRXH2,THIOREDOXIN H2	1.31465	5.78985	0.016723
AT5G24870	RING/U-box superfamily protein	protein_coding	NA	NA	1.31274	3.05435	0.033116
AT2G21970	stress enhanced protein 2	protein_coding	stress enhanced protein 2	NA	1.31194	5.78647	0.041668
AT5G38895	RING/U-box superfamily protein	protein_coding	NA	NA	1.31132	3.24454	0.046233
AT1G50260	N-terminal-transmembrane-C2 domain type 5.1	protein_coding	N-terminal-transmembrane-C2 domain type 5.1	NTMC2TYPE5.1	1.30407	4.02635	0.03437
AT1G70810	Calcium-dependent lipid-binding (CaLB domain) family protein	protein_coding	NA	CAR7,C2-domain ABA-related7	1.30375	5.25742	0.020908
AT5G50440	membrin 12	protein_coding	membrin 12	ATMEMB12	1.30363	1.88653	0.04232
AT2G30490	cinnamate-4-hydroxylase	protein_coding	cinnamate-4-hydroxylase	ATC4H,CINNAMATE 4-HYDROXYLASE,CYP73A5,REF3,REDUCED EPRDERMAL FLUORESCENCE 3	1.30301	6.98082	0.039923
AT2G26980	CBL-interacting protein kinase 3	protein_coding	CBL-interacting protein kinase 3	SnRK3.17,SNF1-RELATED PROTEIN KINASE 3.17	1.30291	5.17504	0.01623
AT1G07520	GRAS family transcription factor	protein_coding	NA	NA	1.30173	3.01403	0.048704
AT5G50240	protein-l-isoaspartate methyltransferase 2	protein_coding	protein-l-isoaspartate methyltransferase 2	AtPIMT2,Arabidopsis thaliana protein-l-isoaspartate methyltransferase 2	1.29885	3.29483	0.02166
AT1G12200	Flavin-binding monooxygenase family protein	protein_coding	flavin monooxygenase	NA	1.2966	2.91445	0.039017
AT5G45130	Ras small GTP-binding family protein	protein_coding	RAB homolog 1	ATRAB-F2A,ARABIDOPSIS RAB HOMOLOG F2A,ATRAB5A,ATRABF2A,RAB-F2A,RAB HOMOLOG F2A,RAB5A,RABF2A	1.29499	6.11669	0.032599
AT4G11600	glutathione peroxidase 6	protein_coding	glutathione peroxidase 6	ATGPX6,glutathione peroxidase 6,LSC803,PHGPX	1.29353	8.38241	0.035126
AT3G48890	membrane-associated progesterone binding protein 3	protein_coding	membrane-associated progesterone binding protein 3	ATMAPR3,ARABIDOPSIS THALIANA MEMBRANE-ASSOCIATED PROGESTERONE BINDING PROTEIN 3,ATMP2,MSBP2,MEMBRANE STEROID BINDING PROTEIN 2	1.28735	6.15672	0.014025
AT2G40830	RING-H2 finger C1A	protein_coding	RING-H2 finger C1A	NA	1.28705	5.67171	0.009761
AT2G28000	chaperonin-60alpha	protein_coding	chaperonin-60alpha	CH-CPN60A,CHLOROPLAST CHAPERONIN 60ALPHA,Cpn60alpha1,chaperonin-60alpha1,SLP,SCHLEPPERLESS	1.28635	9.63063	0.017782
AT4G25700	beta-hydroxylase 1	protein_coding	beta-hydroxylase 1	B1,BCH1,BETA CAROTENOID HYDROXYLASE 1,chy1	1.28556	5.21171	0.046592
AT5G46170	F-box family protein	protein_coding	NA	NA	1.28463	4.95688	0.006727
AT4G35600	Protein kinase superfamily protein	protein_coding	CAST AWAY	CX32,CONNEXIN 32,Kin4,kinase 4	1.28252	4.03537	0.0357
AT3G18950	Transducin/WD40 repeat-like superfamily protein	protein_coding	NA	NA	1.28093	2.83709	0.03437
AT1G60420	DC1 domain-containing protein	protein_coding	NA	AtNRX1,NRX1,nucleoredoxin 1	1.2796	5.65589	0.007244
AT5G05140	Transcription elongation factor (TFIIS) family protein	protein_coding	NA	NA	1.279	4.60834	0.040082
AT2G15310	ADP-ribosylation factor B1A	protein_coding	ADP-ribosylation factor B1A	ATARFB1A,ADP-ribosylation factor B1A	1.27809	1.9175	0.030114
AT1G47128	Granulin repeat cysteine protease family protein	protein_coding	responsive to dehydration 21A	RD21,responsive to dehydration 21	1.27602	9.14555	0.038622
AT2G04350	AMP-dependent synthetase and ligase family protein	protein_coding	long-chain acyl-CoA synthetase 8	NA	1.2759	6.74908	0.01682
AT5G64170	dentin sialophosphoprotein-like protein	protein_coding	NA	LNK1,night light-inducible and clock-regulated 1	1.27564	6.8845	0.014144
AT4G15690	Thioredoxin superfamily protein	protein_coding	NA	NA	1.2731	2.99245	0.007049
AT5G16110	hypothetical protein	protein_coding	NA	NA	1.27104	5.50496	0.031757
AT1G08650	phosphoenolpyruvate carboxylase kinase 1	protein_coding	phosphoenolpyruvate carboxylase kinase 1	ATPPCK1,PHOSPHOENOLPYRUVATE CARBOXYLASE KINASE 1	1.27055	6.82205	0.044107
AT4G26970	aconitase 2	protein_coding	aconitase 2	NA	1.26921	7.87796	0.010762
AT4G08290	nodulin MtN21 /EamA-like transporter family protein	protein_coding	Usually multiple acids move in and out Transporters 20	NA	1.26809	3.6117	0.025553
AT1G80830	natural resistance-associated macrophage protein 1	protein_coding	natural resistance-associated macrophage protein 1	ATNRAMP1,PMIT1	1.26645	4.33391	0.018575
AT4G02740	F-box/RNI-like superfamily protein	protein_coding	NA	NA	1.2655	4.38262	0.011887
AT3G28850	Glutaredoxin family protein	protein_coding	NA	NA	1.2646	1.78884	0.04713
AT4G17650	Polyketide cyclase / dehydrase and lipid transport protein	protein_coding	NA	NA	1.26123	5.04354	0.042415
AT5G63680	Pyruvate kinase family protein	protein_coding	NA	NA	1.25977	5.50887	0.033691
AT2G43340	hypothetical protein (DUF1685)	protein_coding	NA	NA	1.25782	3.68392	0.024947
AT3G53780	RHOMBOID-like protein 4	protein_coding	RHOMBOID-like protein 4	ATRBL4,RHOMBOID-like protein 4	1.2546	4.11315	0.010762
AT5G59420	OSBP(oxysterol binding protein)-related protein 3C	protein_coding	OSBP(oxysterol binding protein)-related protein 3C	NA	1.25408	6.53116	0.038164
AT2G45960	plasma membrane intrinsic protein 1B	protein_coding	plasma membrane intrinsic protein 1B	ATHH2,PIP1%3B2,NAMED PLASMA MEMBRANE INTRINSIC PROTEIN 1%3B2,TMP-A,TRANSMEMBRANE PROTEIN A	1.25362	10.1266	0.021063
AT4G22920	non-yellowing 1	protein_coding	NON-YELLOWING 1	ATNYE1,NON-YELLOWING 1,SGR1,STAY-GREEN 1,SGR,STAY-GREEN	1.25244	4.35874	0.043378
AT5G19690	staurosporin and temperature sensitive 3-like A	protein_coding	staurosporin and temperature sensitive 3-like A	NA	1.25015	7.12335	0.036719
AT2G41410	Calcium-binding EF-hand family protein	protein_coding	NA	NA	1.24995	7.06759	0.039923
AT1G74210	PLC-like phosphodiesterases superfamily protein	protein_coding	glycerophosphodiester phosphodiesterase 5	AtGDPD5	1.24928	4.63975	0.03907
AT1G70490	Ras-related small GTP-binding family protein	protein_coding	NA	NA	1.24876	7.6305	0.01697
AT5G65750	2-oxoglutarate dehydrogenase%2C E1 component	protein_coding	NA	NA	1.24332	5.87268	0.0493
AT3G12760	defective in cullin neddylation protein	protein_coding	NA	NA	1.24192	5.21615	0.012378
AT2G33150	peroxisomal 3-ketoacyl-CoA thiolase 3	protein_coding	peroxisomal 3-ketoacyl-CoA thiolase 3	KAT2,3-KETOACYL-COA THIOLASE 2,PED1,PEROXISOME DEFECTIVE 1	1.24176	8.49987	0.047084
AT2G37170	plasma membrane intrinsic protein 2	protein_coding	plasma membrane intrinsic protein 2	PIP2%3B2,PLASMA MEMBRANE INTRINSIC PROTEIN 2%3B2	1.24136	7.36563	0.030114
AT1G29340	plant U-box 17	protein_coding	plant U-box 17	ATPUB17,ARABIDOPSIS THALIANA PLANT U-BOX 17	1.24001	6.00315	0.030995
AT4G37560	Acetamidase/Formamidase family protein	protein_coding	NA	NA	1.23855	4.13727	0.046954
AT4G17840	CAAX protease self-immunity protein	protein_coding	NA	NA	1.2365	6.81829	0.019567
AT4G34370	RING/U-box superfamily protein	protein_coding	ARIADNE 1	ATARI1,ARABIDOPSIS ARIADNE 1	1.23638	4.68128	0.017247
AT3G51990	Protein kinase superfamily protein	protein_coding	NA	NA	1.23551	3.21143	0.013775
AT4G29210	gamma-glutamyl transpeptidase 4	protein_coding	gamma-glutamyl transpeptidase 4	GGT3,gamma-glutamyl transpeptidase 3	1.23333	5.02515	0.028194
AT4G04800	methionine sulfoxide reductase B3	protein_coding	methionine sulfoxide reductase B3	ATMSRB3,methionine sulfoxide reductase B3	1.23263	4.5585	0.020376
AT5G64930	CPR5 protein	protein_coding	CONSTITUTIVE EXPRESSION OF PR GENES 5	HYS1,HYPERSENESCENCE 1	1.23106	3.65894	0.014278
AT3G05165	Major facilitator superfamily protein	protein_coding	NA	NA	1.22869	5.13765	0.038527
AT1G76150	enoyl-CoA hydratase 2	protein_coding	enoyl-CoA hydratase 2	ATECH2	1.22851	5.48569	0.036989
AT3G13235	ubiquitin family protein	protein_coding	DNA-damage inducible 1	NA	1.22754	5.69002	0.018857
AT5G13550	sulfate transporter 4.1	protein_coding	sulfate transporter 4.1	NA	1.22383	5.26637	0.047084
AT4G10110	RNA-binding (RRM/RBD/RNP motifs) family protein	protein_coding	NA	NA	1.22251	3.58585	0.011357
AT1G74280	alpha/beta-Hydrolases superfamily protein	protein_coding	NA	NA	1.2224	2.65559	0.038351
AT5G67140	F-box/RNI-like superfamily protein	protein_coding	NA	NA	1.22053	2.47768	0.04779
AT3G03270	Adenine nucleotide alpha hydrolases-like superfamily protein	protein_coding	NA	NA	1.2205	4.50646	0.04961
AT2G26140	FTSH protease 4	protein_coding	FTSH protease 4	NA	1.21781	7.30816	0.018545
AT3G51130	transmembrane protein	protein_coding	NA	NA	1.21668	4.91342	0.021521
AT4G28570	Long-chain fatty alcohol dehydrogenase family protein	protein_coding	NA	NA	1.21613	4.72771	0.022897
AT1G68650	Uncharacterized protein family (UPF0016)	protein_coding	NA	NA	1.21077	4.05893	0.045534
AT5G01720	RNI-like superfamily protein	protein_coding	NA	NA	1.20902	5.29323	0.048434
AT2G46500	phosphoinositide 4-kinase gamma 4	protein_coding	phosphoinositide 4-kinase gamma 4	ATPI4K GAMMA 4,phosphoinositide 4-kinase gamma 4,UBDK GAMMA 4,UBIQUITIN-LIKE DOMAIN KINASE GAMMA 4	1.20901	5.89731	0.031003
AT1G56520	Disease resistance protein (TIR-NBS-LRR class) family	protein_coding	NA	NA	1.20851	4.46011	0.01375
AT3G57810	Cysteine proteinases superfamily protein	protein_coding	NA	NA	1.20702	4.65228	0.009301
AT5G11680	classical AGP protein	protein_coding	NA	NA	1.20449	5.54974	0.043351
AT5G67600	cysteine-rich TM module stress tolerance protein	protein_coding	WINDHOSE 1	NA	1.20402	4.78981	0.047028
AT1G73680	alpha dioxygenase	protein_coding	alpha dioxygenase	alpha-DOX2,alpha-dioxygenase 2	1.19358	4.22729	0.025094
AT1G32700	PLATZ transcription factor family protein	protein_coding	NA	NA	1.1931	4.72061	0.020447
AT5G37710	alpha/beta-Hydrolases superfamily protein	protein_coding	NA	NA	1.19267	2.84859	0.026315
AT5G40770	prohibitin 3	protein_coding	prohibitin 3	ATPHB3,prohibitin 3,EER3	1.19258	6.4924	0.026199
AT5G22850	Eukaryotic aspartyl protease family protein	protein_coding	NA	NA	1.19208	4.62722	0.049244
AT2G36300	Integral membrane Yip1 family protein	protein_coding	NA	NA	1.19099	4.43148	0.009931
AT3G24100	Uncharacterized protein family SERF	protein_coding	NA	NA	1.18689	5.32118	0.047982
AT3G44630	Disease resistance protein (TIR-NBS-LRR class) family	protein_coding	NA	NA	1.18673	5.72872	0.007667
AT4G34240	aldehyde dehydrogenase 3I1	protein_coding	aldehyde dehydrogenase 3I1	ALDH3,aldehyde dehydrogenase 3	1.18481	6.68419	0.038605
AT4G04223	other_RNA	other_rna	NA	NA	1.1818	0.980422	0.047905
AT1G53310	phosphoenolpyruvate carboxylase 1	protein_coding	phosphoenolpyruvate carboxylase 1	ATPEPC1,ATPPC1,phosphoenolpyruvate carboxylase 1,PEPC1,PEP(PHOSPHOENOLPYRUVATE) CARBOXYLASE 1	1.17897	7.90759	0.039587
AT5G19930	integral membrane protein (Protein of unknown function DUF92%2C transmembrane)	protein_coding	NA	NA	1.17749	3.65363	0.035357
AT5G66760	succinate dehydrogenase 1-1	protein_coding	succinate dehydrogenase 1-1	NA	1.17584	6.9889	0.041973
AT2G31570	glutathione peroxidase 2	protein_coding	glutathione peroxidase 2	ATGPX2,glutathione peroxidase 2	1.17523	6.68392	0.018146
AT5G61390	Polynucleotidyl transferase%2C ribonuclease H-like superfamily protein	protein_coding	NA	NEN2,NAC45/86-DEPENDENT EXONUCLEASE-DOMAIN PROTEIN 2	1.17487	2.75579	0.025225
AT1G05170	Galactosyltransferase family protein	protein_coding	NA	NA	1.17202	4.92921	0.014021
AT4G14800	20S proteasome beta subunit D2	protein_coding	20S proteasome beta subunit D2	NA	1.1703	5.49828	0.006186
AT5G45410	zinc finger B-box protein	protein_coding	NA	NA	1.16998	6.83223	0.014278
AT2G44280	Major facilitator superfamily protein	protein_coding	NA	NA	1.16771	2.67634	0.045416
AT4G01610	Cysteine proteinases superfamily protein	protein_coding	NA	NA	1.16468	6.64311	0.043161
AT1G12060	BCL-2-associated athanogene 5	protein_coding	BCL-2-associated athanogene 5	ATBAG5,BCL-2-associated athanogene 5	1.16253	2.37448	0.039568
AT2G39100	RING/U-box superfamily protein	protein_coding	NA	NA	1.16251	2.80066	0.036803
AT5G51040	succinate dehydrogenase assembly factor	protein_coding	Succinate dehydrogenase assembly factor 2	NA	1.16247	5.37121	0.007244
AT3G01100	hypothetical protein 1	protein_coding	hypothetical protein 1	ATHYP1,ARABIDOPSIS THALIANA HYPOTHETICAL PROTEIN 1	1.15661	5.13937	0.016859
AT4G39520	GTP-binding protein-like protein	protein_coding	NA	Drg1-1	1.15646	6.22235	0.009965
AT4G05390	root FNR 1	protein_coding	root FNR 1	ATRFNR1,root FNR 1	1.15532	4.11951	0.026611
AT5G45370	nodulin MtN21 /EamA-like transporter family protein	protein_coding	Usually multiple acids move in and out Transporters 1	NA	1.1551	2.50479	0.020335
AT5G58787	RING/U-box superfamily protein	protein_coding	NA	NA	1.15311	3.89328	0.047084
AT2G01600	ENTH/ANTH/VHS superfamily protein	protein_coding	NA	NA	1.15223	5.69755	0.020447
AT3G03640	beta glucosidase 25	protein_coding	beta glucosidase 25	GLUC	1.14873	4.89735	0.04232
AT3G53340	nuclear factor Y%2C subunit B10	protein_coding	nuclear factor Y%2C subunit B10	NA	1.14863	3.48615	0.02427
AT2G36900	membrin 11	protein_coding	membrin 11	ATMEMB11	1.14709	3.78536	0.025225
AT3G26590	MATE efflux family protein	protein_coding	NA	NA	1.14675	4.32802	0.013586
AT2G42950	Magnesium transporter CorA-like family protein	protein_coding	NA	NA	1.14586	3.20147	0.021081
AT1G09100	26S proteasome AAA-ATPase subunit RPT5B	protein_coding	26S proteasome AAA-ATPase subunit RPT5B	NA	1.14314	4.84706	0.01237
AT3G09810	isocitrate dehydrogenase VI	protein_coding	isocitrate dehydrogenase VI	NA	1.1421	4.99778	0.041862
AT1G54030	GDSL-like Lipase/Acylhydrolase superfamily protein	protein_coding	MODIFIED VACUOLE PHENOTYPE 1	ERMO3,ENDOPLASMIC RETICULUM MORPHOLOGY 3,GOLD36,GOLGI DEFECTS 36,NUC,NUCLEAR CAGE	1.14046	5.93451	0.022207
AT1G06645	2-oxoglutarate (2OG) and Fe(II)-dependent oxygenase superfamily protein	protein_coding	NA	NA	1.14017	3.82028	0.033548
AT2G39270	P-loop containing nucleoside triphosphate hydrolases superfamily protein	protein_coding	NA	NA	1.13863	4.96174	0.028995
AT5G51430	conserved oligomeric Golgi complex component-related / COG complex component-like protein	protein_coding	EMBRYO YELLOW	NA	1.1265	6.11788	0.03233
AT5G62460	RING/FYVE/PHD zinc finger superfamily protein	protein_coding	NA	NA	1.12244	4.24923	0.041668
AT4G28300	formin-like protein (DUF1421)	protein_coding	NA	NA	1.12161	6.12151	0.016645
AT5G35460	membrane protein	protein_coding	NA	NA	1.11981	5.83066	0.043341
AT1G78610	mechanosensitive channel of small conductance-like 6	protein_coding	mechanosensitive channel of small conductance-like 6	NA	1.11897	5.6614	0.038571
AT5G48610	myb-like protein X	protein_coding	NA	NA	1.11877	3.32893	0.035757
AT5G42790	proteasome alpha subunit F1	protein_coding	proteasome alpha subunit F1	ARS5,ARSENIC TOLERANCE 5,ATPSM30	1.11658	6.51269	0.013513
AT5G11340	Acyl-CoA N-acyltransferases (NAT) superfamily protein	protein_coding	NA	NA	1.11116	4.56442	0.017793
AT3G48690	alpha/beta-Hydrolases superfamily protein	protein_coding	NA	NA	1.11103	6.85735	0.02342
AT4G18890	BES1/BZR1 homolog 3	protein_coding	BES1/BZR1 homolog 3	NA	1.10717	2.70865	0.047542
AT5G13100	Gap junction beta-4 protein	protein_coding	NA	NA	1.10523	4.94308	0.044736
AT3G51520	diacylglycerol acyltransferase family	protein_coding	diacylglycerol acyltransferase 2	AtDGAT2	1.09879	5.00671	0.008936
AT4G14950	SNARE associated Golgi protein family	protein_coding	Killing Me Slowly 1	NA	1.09859	4.51222	0.032258
AT3G52930	Aldolase superfamily protein	protein_coding	fructose-bisphosphate aldolase 8	AtFBA8	1.09638	8.52642	0.014345
AT5G60360	aleurain-like protease	protein_coding	aleurain-like protease	AALP,aleurain-like protease,SAG2,SENESCENCE ASSOCIATED GENE2	1.09443	9.04271	0.014021
AT1G06290	acyl-CoA oxidase 3	protein_coding	acyl-CoA oxidase 3	ATACX3	1.09277	6.2188	0.015296
AT5G63030	Thioredoxin superfamily protein	protein_coding	glutaredoxin C1	NA	1.09243	5.15046	0.017782
AT2G43630	nucleusenvelope protein	protein_coding	NA	NA	1.0919	6.10167	0.008367
AT5G40850	urophorphyrin methylase 1	protein_coding	urophorphyrin methylase 1	NA	1.09137	5.55537	0.032149
AT1G69410	eukaryotic elongation factor 5A-3	protein_coding	eukaryotic elongation factor 5A-3	ATELF5A-3,EUKARYOTIC ELONGATION FACTOR 5A-3	1.09001	6.92936	0.015826
AT4G13400	2-oxoglutarate (2OG) and Fe(II)-dependent oxygenase superfamily protein	protein_coding	NA	NA	1.08842	2.38035	0.038781
AT5G21090	Leucine-rich repeat (LRR) family protein	protein_coding	NA	NA	1.08596	8.10763	0.039337
AT5G05110	Cystatin/monellin family protein	protein_coding	NA	NA	1.08549	4.26187	0.017445
AT1G22840	CYTOCHROME C-1	protein_coding	CYTOCHROME C-1	ATCYTC-A,CYTOCHROME C-A	1.0834	6.44439	0.035366
AT1G78150	N-lysine methyltransferase	protein_coding	NA	NA	1.07751	6.05469	0.029356
AT1G58030	cationic amino acid transporter 2	protein_coding	cationic amino acid transporter 2	AtCAT2	1.07739	5.34924	0.045416
AT5G40580	20S proteasome beta subunit PBB2	protein_coding	20S proteasome beta subunit PBB2	NA	1.074	5.60592	0.012058
AT1G03860	prohibitin 2	protein_coding	prohibitin 2	ATPHB2,prohibitin 2	1.07362	6.11607	0.014819
AT5G05100	Single-stranded nucleic acid binding R3H protein	protein_coding	NA	NA	1.07336	4.88833	0.02046
AT4G16190	Papain family cysteine protease	protein_coding	NA	NA	1.07303	8.99142	0.025609
AT1G17530	translocase of inner mitochondrial membrane 23	protein_coding	translocase of inner mitochondrial membrane 23	ATTIM23-1,translocase of inner mitochondrial membrane 23	1.07191	4.51751	0.027703
AT3G23600	alpha/beta-Hydrolases superfamily protein	protein_coding	NA	NA	1.07058	7.26522	0.011901
AT1G78230	Outer arm dynein light chain 1 protein	protein_coding	NA	NA	1.06733	4.96293	0.035523
AT5G47860	Gut esterase (DUF1350)	protein_coding	NA	NA	1.06633	5.67454	0.017959
AT5G42300	ubiquitin-like protein 5	protein_coding	ubiquitin-like protein 5	NA	1.06631	7.42016	0.012021
AT2G17420	NADPH-dependent thioredoxin reductase A	protein_coding	NADPH-dependent thioredoxin reductase A	ATNTRA,THIOREDOXIN REDUCTASE A,NTR2,NADPH-DEPENDENT THIOREDOXIN REDUCTASE 2	1.06565	6.24917	0.028404
AT5G61530	small G protein family protein / RhoGAP family protein	protein_coding	NA	NA	1.06351	5.56452	0.048971
AT1G59820	aminophospholipid ATPase 3	protein_coding	aminophospholipid ATPase 3	NA	1.06173	5.35863	0.045272
AT4G03030	Galactose oxidase/kelch repeat superfamily protein	protein_coding	NA	NA	1.05847	5.42451	0.024622
AT3G55960	Haloacid dehalogenase-like hydrolase (HAD) superfamily protein	protein_coding	NA	NA	1.05598	4.8304	0.010719
AT1G67060	peptidase M50B-like protein	protein_coding	NA	NA	1.05528	2.89162	0.044736
AT4G18230	UDP-N-acetylglucosamine transferase subunit ALG14-like protein	protein_coding	NA	NA	1.05414	4.09798	0.011887
AT4G19640	Ras-related small GTP-binding family protein	protein_coding	NA	NA	1.0515	5.81201	0.031663
AT1G17100	SOUL heme-binding family protein	protein_coding	haem-binding protein 1	AtHBP1	1.04907	6.48752	0.035353
AT2G21190	ER lumen protein retaining receptor family protein	protein_coding	NA	NA	1.04806	5.08904	0.018884
AT5G29000	Homeodomain-like superfamily protein	protein_coding	PHR1-like 1	NA	1.04793	4.44478	0.0443
AT1G56450	20S proteasome beta subunit G1	protein_coding	20S proteasome beta subunit G1	NA	1.04726	6.80464	0.010459
AT5G56180	actin-related protein 8	protein_coding	actin-related protein 8	ATARP8,actin-related protein 8	1.04482	4.51296	0.00847
AT1G48745	hypothetical protein	protein_coding	NA	NA	1.03985	1.55235	0.040974
AT3G53120	Modifier of rudimentary (Mod(r)) protein	protein_coding	NA	NA	1.03615	3.92086	0.037669
AT5G13310	hypothetical protein	protein_coding	NA	NA	1.03483	3.6499	0.049554
AT2G45330	RNA 2'-phosphotransferase%2C Tpt1 / KptA family	protein_coding	embryo defective 1067	TRPT,2' tRNA phosphotransferase	1.0322	3.69606	0.026479
AT2G22970	serine carboxypeptidase-like 11	protein_coding	serine carboxypeptidase-like 11	NA	1.03156	4.65067	0.017907
AT3G01590	Galactose mutarotase-like superfamily protein	protein_coding	NA	NA	1.02595	4.80026	0.019567
AT5G16880	Target of Myb protein 1	protein_coding	NA	NA	1.02459	6.38789	0.044148
AT5G35370	S-locus lectin protein kinase family protein	protein_coding	NA	NA	1.02434	3.15995	0.025134
AT4G33140	Haloacid dehalogenase-like hydrolase (HAD) superfamily protein	protein_coding	NA	NA	1.02321	3.7381	0.014025
AT5G08300	Succinyl-CoA ligase%2C alpha subunit	protein_coding	NA	NA	1.02159	6.51181	0.044403
AT1G79610	Na+/H+ antiporter 6	protein_coding	Na+/H+ antiporter 6	ATNHX6,ARABIDOPSIS NA+/H+ ANTIPORTER 6	1.02012	4.1108	0.045569
AT3G57480	zinc finger (C2H2 type%2C AN1-like) family protein	protein_coding	NA	NA	1.01774	2.51718	0.038693
AT2G36530	Enolase	protein_coding	LOW EXPRESSION OF OSMOTICALLY RESPONSIVE GENES 2	ENO2,ENOLASE 2	1.01602	9.44669	0.03719
AT5G26760	RNA polymerase II subunit B1 CTD phosphatase RPAP2-like protein	protein_coding	NA	NA	1.01524	5.37296	0.020447
AT3G03950	evolutionarily conserved C-terminal region 1	protein_coding	evolutionarily conserved C-terminal region 1	NA	1.01507	5.24865	0.019601
AT1G22410	Class-II DAHP synthetase family protein	protein_coding	NA	NA	1.01495	7.52278	0.047913
AT5G54870	inositol-1%2C4%2C5-trisphosphate 5-phosphatase	protein_coding	NA	NA	1.01274	5.3304	0.01682
AT1G66910	Protein kinase superfamily protein	protein_coding	NA	NA	1.01233	4.54514	0.016026
AT4G11740	Ubiquitin-like superfamily protein	protein_coding	NA	NA	1.0099	5.24317	0.009761
AT3G13224	RNA-binding (RRM/RBD/RNP motifs) family protein	protein_coding	NA	NA	1.00767	4.44069	0.027039
AT3G44340	hypothetical protein	protein_coding	clone eighty-four	NA	1.00598	6.60225	0.018798
AT5G53330	Ubiquitin-associated/translation elongation factor EF1B protein	protein_coding	NA	NA	1.0047	4.98799	0.015309
AT4G33780	ATP phosphoribosyltransferase regulatory subunit	protein_coding	NA	NA	1.00467	4.87343	0.010557
AT5G56600	profilin	protein_coding	profilin 3	PFN3,PROFILIN 3	1.00307	5.34713	0.011357
AT3G02520	general regulatory factor 7	NA	NA	NA	1.00249	6.2911	0.026479
AT4G38230	calcium-dependent protein kinase 26	protein_coding	calcium-dependent protein kinase 26	ATCPK26,ARABIDOPSIS THALIANA CALCIUM-DEPENDENT PROTEIN KINASE 26	1.00236	2.47086	0.032329
AT1G08720	Protein kinase superfamily protein	protein_coding	ENHANCED DISEASE RESISTANCE 1	ATEDR1	1.001	4.87683	0.038759
AT2G05710	aconitase 3	protein_coding	aconitase 3	NA	1.0009	8.87604	0.014144
AT2G01140	Aldolase superfamily protein	protein_coding	PIGMENT DEFECTIVE 345	AtFBA3,FBA3,fructose-bisphosphate aldolase 3	0.999504	6.73651	0.010762
AT4G15955	alpha/beta-Hydrolases superfamily protein	protein_coding	NA	NA	0.998836	3.40214	0.04348
AT2G42890	MEI2-like 2	protein_coding	MEI2-like 2	AML2,MEI2-like 2	0.998281	4.29058	0.034208
AT1G54320	LEM3 (ligand-effect modulator 3) family protein / CDC50 family protein	protein_coding	NA	NA	0.997839	6.08499	0.015826
AT5G19550	aspartate aminotransferase 2	protein_coding	aspartate aminotransferase 2	AAT2,ASPARTATE AMINOTRANSFERASE 2	0.995237	6.90147	0.031757
AT2G26740	soluble epoxide hydrolase	protein_coding	soluble epoxide hydrolase	ATSEH,soluble epoxide hydrolase	0.994176	6.43774	0.042955
AT5G13390	no exine formation 1	protein_coding	NO EXINE FORMATION 1	NA	0.993867	6.0362	0.01811
AT5G06960	OCS-element binding factor 5	protein_coding	OCS-element binding factor 5	TGA5,TGACG MOTIF-BINDING FACTOR 5	0.991159	3.81583	0.0454
AT1G31130	polyadenylate-binding protein 1-B-binding protein	protein_coding	NA	NA	0.988195	6.46959	0.046592
AT4G10970	ribosome maturation factor	protein_coding	NA	NA	0.988154	4.48006	0.032178
AT5G49950	alpha/beta-Hydrolases superfamily protein	protein_coding	NA	NA	0.988089	4.74039	0.007786
AT3G51260	20S proteasome alpha subunit PAD1	protein_coding	20S proteasomealpha subunit PAD1	NA	0.987031	6.75038	0.009931
AT5G56150	ubiquitin-conjugating enzyme 30	protein_coding	ubiquitin-conjugating enzyme 30	NA	0.985722	5.19514	0.013386
AT2G24200	Cytosol aminopeptidase family protein	protein_coding	leucyl aminopeptidase 1	atLAP1	0.983494	7.93641	0.031983
AT3G47810	Calcineurin-like metallo-phosphoesterase superfamily protein	protein_coding	MAIGO 1	ATVPS29,VPS29,VACUOLAR PROTEIN SORTING 29	0.983182	6.42549	0.010589
AT5G58290	regulatory particle triple-A ATPase 3	protein_coding	regulatory particle triple-A ATPase 3	NA	0.981427	7.3105	0.036897
AT5G36880	acetyl-CoA synthetase	protein_coding	acetyl-CoA synthetase	NA	0.981277	7.0584	0.025503
AT5G57660	CONSTANS-like 5	protein_coding	CONSTANS-like 5	ATCOL5,BBX6,B-box domain protein 6	0.978201	6.87131	0.038202
AT1G15110	phosphatidyl serine synthase family protein	protein_coding	phosphatidylserine synthase 1	AtPSS1	0.973376	2.85156	0.039752
AT1G19680	RING/U-box superfamily protein	protein_coding	NA	NA	0.972998	4.39429	0.028194
AT5G49570	peptide-N-glycanase 1	protein_coding	peptide-N-glycanase 1	AtPNG1,peptide-N-glycanase 1	0.972426	4.80169	0.049851
AT2G38710	AMMECR1 family	protein_coding	NA	NA	0.97125	4.24482	0.019766
AT3G46530	NB-ARC domain-containing disease resistance protein	protein_coding	RECOGNITION OF PERONOSPORA PARASITICA 13	NA	0.968084	6.0292	0.03197
AT3G46450	SEC14 cytosolic factor family protein / phosphoglyceride transfer family protein	protein_coding	NA	NA	0.967555	5.23512	0.044705
AT3G11270	Mov34/MPN/PAD-1 family protein	protein_coding	maternal effect embryo arrest 34	NA	0.966425	4.43099	0.016157
AT5G19480	mediator of RNA polymerase II transcription subunit	protein_coding	NA	NA	0.96557	3.64232	0.017247
AT1G30400	multidrug resistance-associated protein 1	protein_coding	ATP-binding cassette C1	ATABCC1,Arabidopsis thaliana ATP-binding cassette C1,ATMRP1,ARABIDOPSIS THALIANA MULTIDRUG RESISTANCE-ASSOCIATED PROTEIN 1,EST1,MRP1,multidrug resistance-associated protein 1	0.963048	7.23486	0.034991
AT1G53750	regulatory particle triple-A 1A	protein_coding	regulatory particle triple-A 1A	NA	0.962413	7.51644	0.021867
AT2G46080	BPS1-like protein	protein_coding	BYPASS 2	NA	0.96179	5.13589	0.019567
AT2G39960	Microsomal signal peptidase 25 kDa subunit (SPC25)	protein_coding	NA	NA	0.961317	5.61629	0.014144
AT3G11690	hypothetical protein	protein_coding	NA	NA	0.960368	2.77922	0.043423
AT3G48070	RING/U-box superfamily protein	protein_coding	NA	NA	0.959407	5.39052	0.037652
AT3G13050	Major facilitator superfamily protein	protein_coding	nicotinate transporter	AtNiaP	0.958963	4.14934	0.036212
AT5G10946	hypothetical protein	protein_coding	NA	NA	0.958787	2.31765	0.048719
AT4G18140	SCP1-like small phosphatase 4b	protein_coding	SCP1-like small phosphatase 4b	NA	0.957678	4.10334	0.009761
AT3G03790	ankyrin repeat family protein / regulator of chromosome condensation (RCC1) family protein	protein_coding	NA	NA	0.957648	5.92657	0.036642
AT1G32380	phosphoribosyl pyrophosphate (PRPP) synthase 2	protein_coding	phosphoribosyl pyrophosphate (PRPP) synthase 2	NA	0.956496	4.14177	0.027703
AT2G01650	plant UBX domain-containing protein 2	protein_coding	plant UBX domain-containing protein 2	NA	0.954459	4.49202	0.041668
AT3G12300	cilia/flagella-associated protein	protein_coding	NA	NA	0.953891	3.54263	0.024086
AT2G26000	zinc finger (C3HC4-type RING finger) family protein	protein_coding	BRAP2 RING ZnF UBP domain-containing protein 2	NA	0.953234	3.02323	0.03443
AT1G02750	Drought-responsive family protein	protein_coding	NA	NA	0.952602	3.19657	0.020852
AT5G55070	Dihydrolipoamide succinyltransferase	protein_coding	NA	NA	0.952512	6.70671	0.043351
AT5G12840	nuclear factor Y%2C subunit A1	protein_coding	nuclear factor Y%2C subunit A1	ATHAP2A,AtNFYA1,EMB2220,EMBRYO DEFECTIVE 2220,HAP2A,NFYA1,nuclear factor Y subunit A1	0.951075	4.47771	0.013942
AT1G68140	zinc finger/BTB domain protein%2C putative (DUF1644)	protein_coding	NA	NA	0.950858	4.93374	0.031983
AT1G60440	pantothenate kinase 1	protein_coding	pantothenate kinase 1	ATCOAA,ATPANK1,pantothenate kinase 1	0.949964	4.02621	0.042759
AT5G10610	cytochrome P450%2C family 81%2C subfamily K%2C polypeptide 1	protein_coding	cytochrome P450%2C family 81%2C subfamily K%2C polypeptide 1	NA	0.949567	4.07681	0.029573
AT2G27020	20S proteasome alpha subunit G1	protein_coding	20S proteasome alpha subunit G1	NA	0.94629	6.65014	0.011684
AT1G20890	caveolin-1 protein	protein_coding	NA	NA	0.941296	2.66786	0.048704
AT5G38990	Malectin/receptor-like protein kinase family protein	protein_coding	NA	NA	0.938741	5.8124	0.043203
AT1G64520	regulatory particle non-ATPase 12A	protein_coding	regulatory particle non-ATPase 12A	NA	0.9377	6.34325	0.020447
AT1G16470	proteasome subunit PAB1	protein_coding	proteasome subunit PAB1	NA	0.937223	6.09739	0.012192
AT5G12230	mediator of RNA polymerase II transcription subunit 19a-like protein	protein_coding	NA	NA	0.937182	4.25355	0.0407
AT1G23190	Phosphoglucomutase/phosphomannomutase family protein	protein_coding	phosphoglucomutase 3	NA	0.937149	7.00618	0.027314
AT2G32520	alpha/beta-Hydrolases superfamily protein	protein_coding	NA	NA	0.935371	5.96436	0.046786
AT1G29260	peroxin 7	protein_coding	peroxin 7	ATPEX7,ARABIDOPSIS PEROXIN 7	0.933948	4.99287	0.024332
AT1G74230	glycine-rich RNA-binding protein 5	protein_coding	glycine-rich RNA-binding protein 5	NA	0.933766	6.12432	0.010476
AT3G06540	Rab escort protein	protein_coding	Rab escort protein	AthREP	0.929186	4.73144	0.04684
AT5G61060	histone deacetylase 5	protein_coding	histone deacetylase 5	ATHDA5,HDA5	0.928786	5.13072	0.044666
AT2G33740	Nitrogen regulatory PII-like%2C alpha/beta	protein_coding	NA	NA	0.928765	4.71245	0.017173
AT1G14330	Galactose oxidase/kelch repeat superfamily protein	protein_coding	NA	NA	0.927266	3.21247	0.037269
AT5G66140	proteasome alpha subunit D2	protein_coding	proteasome alpha subunit D2	NA	0.923959	5.51912	0.011886
AT1G25520	Uncharacterized protein family (UPF0016)	protein_coding	NA	NA	0.921471	4.57527	0.020496
AT5G04080	cysteine-rich TM module stress tolerance protein	protein_coding	NA	NA	0.918295	3.40034	0.02412
AT3G10915	Reticulon family protein	protein_coding	NA	NA	0.916611	4.03541	0.015826
AT1G02890	AAA-type ATPase family protein	protein_coding	NA	NA	0.915831	6.85259	0.023677
AT5G13070	MSF1-like family protein	protein_coding	NA	NA	0.912649	4.66119	0.041668
AT4G10430	TMPIT-like protein	protein_coding	NA	NA	0.910491	5.13388	0.020335
AT3G58490	Phosphatidic acid phosphatase (PAP2) family protein	protein_coding	sphingoid phosphate phosphatase 1	AtSPP1,LPPdelta,lipid phosphate phosphatase delta	0.907057	4.32531	0.029426
AT2G26800	Aldolase superfamily protein	protein_coding	NA	NA	0.905719	5.31214	0.028194
AT5G51290	Diacylglycerol kinase family protein	protein_coding	ACCELERATED CELL DEATH 5	NA	0.904342	4.96967	0.02342
AT2G34470	urease accessory protein G	protein_coding	urease accessory protein G	PSKF109	0.904112	5.96178	0.022659
AT3G51730	saposin B domain-containing protein	protein_coding	NA	NA	0.901072	6.63491	0.013513
AT3G18430	Calcium-binding EF-hand family protein	protein_coding	NA	NA	0.900829	4.07295	0.014021
AT1G34380	5'-3' exonuclease family protein	protein_coding	NA	NA	0.899842	3.48535	0.04232
AT1G16180	Serinc-domain containing serine and sphingolipid biosynthesis protein	protein_coding	NA	NA	0.899284	7.3875	0.029884
AT4G32670	RING/FYVE/PHD zinc finger superfamily protein	protein_coding	NA	NA	0.897177	3.39992	0.043203
AT2G21150	XAP5 family protein	protein_coding	XAP5 CIRCADIAN TIMEKEEPER	NA	0.896951	4.29645	0.037652
AT1G19400	Erythronate-4-phosphate dehydrogenase family protein	protein_coding	NA	NA	0.892803	5.59401	0.04232
AT1G64140	WRKY transcription factor	protein_coding	NA	NA	0.890942	7.16657	0.030474
AT3G10030	aspartate/glutamate/uridylate kinase family protein	protein_coding	NA	NA	0.890336	4.43936	0.039588
AT3G56950	small and basic intrinsic protein 2%3B1	protein_coding	small and basic intrinsic protein 2%3B1	SIP2,SMALL AND BASIC INTRINSIC PROTEIN 2	0.89008	4.14053	0.023519
AT3G27890	NADPH:quinone oxidoreductase	protein_coding	NADPH:quinone oxidoreductase	NA	0.889094	5.96492	0.036642
AT2G44520	cytochrome c oxidase 10	protein_coding	cytochrome c oxidase 10	NA	0.889094	5.27564	0.013695
AT3G59210	F-box/RNI-like superfamily protein	protein_coding	NA	NA	0.887638	4.53831	0.042699
AT4G25130	peptide met sulfoxide reductase 4	protein_coding	peptide met sulfoxide reductase 4	MSRA4,methionine sulfoxide reductase A4	0.887294	8.12796	0.018483
AT5G58375	Methyltransferase-related protein	protein_coding	NA	NA	0.885026	4.18194	0.048653
AT3G22845	emp24/gp25L/p24 family/GOLD family protein	protein_coding	NA	NA	0.882726	5.74524	0.038636
AT2G36810	ARM repeat superfamily protein	protein_coding	NA	SGR6,SHOOT GRAVITROPISM 6	0.880951	5.98249	0.022094
AT2G39950	flocculation protein	protein_coding	NA	NA	0.880672	5.04221	0.018483
AT5G37680	ADP-ribosylation factor-like A1A	protein_coding	ADP-ribosylation factor-like A1A	ATARLA1A,ADP-ribosylation factor-like A1A	0.880399	3.84818	0.048212
AT5G44660	hypothetical protein	protein_coding	NA	NA	0.879677	4.41669	0.037996
AT3G21810	Zinc finger C-x8-C-x5-C-x3-H type family protein	protein_coding	NA	NA	0.878976	4.02485	0.042653
AT5G65900	DEA(D/H)-box RNA helicase family protein	protein_coding	NA	NA	0.878716	4.60485	0.035856
AT1G27000	GRIP/coiled-coil protein%2C putative (DUF1664)	protein_coding	NA	NA	0.878233	6.07319	0.024008
AT4G17830	Peptidase M20/M25/M40 family protein	protein_coding	NA	AtNAOD,N2-acetylornithine deacetylase	0.877914	6.11202	0.037552
AT1G28580	GDSL-like Lipase/Acylhydrolase superfamily protein	protein_coding	NA	NA	0.877808	4.84443	0.02918
AT3G27020	YELLOW STRIPE like 6	protein_coding	YELLOW STRIPE like 6	AtYSL6	0.876757	6.06633	0.047451
AT5G10870	chorismate mutase 2	protein_coding	chorismate mutase 2	ATCM2,chorismate mutase 2	0.876118	3.45345	0.021068
AT1G32210	Defender against death (DAD family) protein	protein_coding	DEFENDER AGAINST APOPTOTIC DEATH 1	NA	0.875606	4.97117	0.018483
AT5G40930	translocase of outer membrane 20-4	protein_coding	translocase of outer membrane 20-4	NA	0.874082	4.95499	0.036745
AT5G04750	F1F0-ATPase inhibitor protein	protein_coding	NA	NA	0.872289	5.21334	0.01721
AT4G03120	C2H2 and C2HC zinc fingers superfamily protein	protein_coding	NA	NA	0.869132	3.73792	0.03297
AT1G22750	transmembrane protein	protein_coding	NA	NA	0.868936	5.64478	0.011789
AT3G19990	E3 ubiquitin-protein ligase	protein_coding	NA	NA	0.868652	4.97777	0.039568
AT5G47430	DWNN domain%2C a CCHC-type zinc finger	protein_coding	NA	NA	0.868442	5.30443	0.046583
AT4G33300	ADR1-like 1	protein_coding	ADR1-like 1	NA	0.867931	6.75378	0.047451
AT5G01350	UvrABC system C protein	protein_coding	NA	NA	0.861917	5.77465	0.041472
AT5G04920	EAP30/Vps36 family protein	protein_coding	NA	NA	0.860295	5.64387	0.025947
AT2G11520	calmodulin-binding receptor-like cytoplasmic kinase 3	protein_coding	calmodulin-binding receptor-like cytoplasmic kinase 3	NA	0.858976	4.9832	0.022845
AT5G67330	natural resistance associated macrophage protein 4	protein_coding	natural resistance associated macrophage protein 4	ATNRAMP4,ARABIDOPSIS THALIANA NATURAL RESISTANCE ASSOCIATED MACROPHAGE PROTEIN 4	0.858438	5.49626	0.036212
AT2G26590	regulatory particle non-ATPase 13	protein_coding	regulatory particle non-ATPase 13	NA	0.85762	5.06997	0.016723
AT3G12800	short-chain dehydrogenase-reductase B	protein_coding	short-chain dehydrogenase-reductase B	DECR	0.857389	6.64299	0.015137
AT1G19140	ubiquinone biosynthesis COQ9-like protein	protein_coding	NA	NA	0.856765	4.25496	0.039152
AT3G56310	Melibiase family protein	protein_coding	NA	NA	0.85649	6.28259	0.0357
AT5G12040	Nitrilase/cyanide hydratase and apolipoprotein N-acyltransferase family protein	protein_coding	NA	NA	0.854254	5.97718	0.009089
AT5G64760	regulatory particle non-ATPase subunit 5B	protein_coding	regulatory particle non-ATPase subunit 5B	NA	0.848081	4.32093	0.021376
AT1G07030	Mitochondrial substrate carrier family protein	protein_coding	NA	NA	0.84786	4.66599	0.048882
AT3G22630	20S proteasome beta subunit D1	protein_coding	20S proteasome beta subunit D1	PRCGB	0.846896	5.2315	0.011887
AT3G22530	heat shock protein	protein_coding	NA	NA	0.846206	4.16055	0.032149
AT1G04960	golgin family A protein (DUF1664)	protein_coding	NA	NA	0.844036	4.67352	0.03297
AT3G01170	Ribosomal protein L34e superfamily protein	protein_coding	NA	NA	0.842659	4.2896	0.035856
AT1G04970	lipid-binding serum glycoprotein family protein	protein_coding	NA	NA	0.842089	5.21044	0.025392
AT4G26400	RING/U-box superfamily protein	protein_coding	NA	NA	0.840264	4.30514	0.045982
AT5G13030	selenoprotein O	protein_coding	NA	NA	0.839917	7.15407	0.01623
AT3G52880	monodehydroascorbate reductase 1	protein_coding	monodehydroascorbate reductase 1	ATMDAR1,monodehydroascorbate reductase 1	0.838074	8.42785	0.019454
AT1G68820	Transmembrane Fragile-X-F-associated protein	protein_coding	NA	NA	0.837733	4.61736	0.038719
AT3G30390	Transmembrane amino acid transporter family protein	protein_coding	NA	NA	0.83582	8.11804	0.020986
AT2G22780	peroxisomal NAD-malate dehydrogenase 1	protein_coding	peroxisomal NAD-malate dehydrogenase 1	NA	0.835739	6.47346	0.022207
AT1G18720	ER membrane protein%2C putative (DUF962)	protein_coding	NA	NA	0.833674	6.38456	0.022016
AT2G26260	3beta-hydroxysteroid-dehydrogenase/decarboxylase isoform 2	NA	NA	NA	0.830755	4.45893	0.03443
AT1G53850	20S proteasome alpha subunit E1	protein_coding	20S proteasome alpha subunit E1	ATPAE1,ARABIDOPSIS 20S PROTEASOME ALPHA SUBUNIT E1	0.830252	5.47371	0.018842
AT3G02360	6-phosphogluconate dehydrogenase family protein	protein_coding	NA	NA	0.828562	6.98062	0.032149
AT2G23420	nicotinate phosphoribosyltransferase 2	protein_coding	nicotinate phosphoribosyltransferase 2	NA	0.827523	5.29596	0.026615
AT1G74340	dolichol phosphate-mannose biosynthesis regulatory protein-like protein	protein_coding	dolichol phosphate mannose synthase 2	NA	0.826625	4.3677	0.032605
AT5G66850	mitogen-activated protein kinase kinase kinase 5	protein_coding	mitogen-activated protein kinase kinase kinase 5	NA	0.826318	5.69129	0.033829
AT4G14385	histone acetyltransferase subunit NuA4-domain protein	protein_coding	NA	NA	0.82625	3.89439	0.046624
AT5G64180	tropomyosin	protein_coding	NA	NA	0.826079	4.28297	0.025457
AT1G05890	RING/U-box superfamily protein	protein_coding	ARIADNE 5	ATARI5,ARABIDOPSIS ARIADNE 5	0.826017	5.46391	0.039568
AT3G50080	VIER F-box protein 2	protein_coding	VIER F-box proteine 2	NA	0.825976	3.54074	0.046553
AT1G53730	STRUBBELIG-receptor family 6	protein_coding	STRUBBELIG-receptor family 6	NA	0.825374	5.58118	0.023873
AT2G23780	RING/U-box superfamily protein	protein_coding	NA	NA	0.825082	4.95833	0.018032
AT3G20630	ubiquitin-specific protease 14	protein_coding	ubiquitin-specific protease 14	ATUBP14,PER1,phosphate deficiency root hair defective1,TTN6,TITAN6	0.824751	5.57473	0.032025
AT2G01490	phytanoyl-CoA dioxygenase (PhyH) family protein	protein_coding	phytanoyl-CoA 2-hydroxylase	NA	0.82461	5.90362	0.039431
AT4G25230	RPM1 interacting protein 2	protein_coding	RPM1 interacting protein 2	NA	0.824429	5.76787	0.040664
AT3G26340	N-terminal nucleophile aminohydrolases (Ntn hydrolases) superfamily protein	protein_coding	NA	NA	0.824301	4.38664	0.034914
AT1G07980	nuclear factor Y%2C subunit C10	protein_coding	nuclear factor Y%2C subunit C10	NA	0.822878	3.62157	0.016809
AT4G14710	RmlC-like cupins superfamily protein	protein_coding	NA	NA	0.822391	6.30408	0.021978
AT5G46250	RNA-binding protein	protein_coding	La related protein 6a	AtLARP6a	0.821994	6.73316	0.036457
AT2G05840	20S proteasome subunit PAA2	protein_coding	20S proteasome subunit PAA2	NA	0.820267	6.62146	0.030525
AT1G66240	homolog of anti-oxidant 1	protein_coding	homolog of anti-oxidant 1	ATATX1	0.819961	6.53147	0.025553
AT2G04550	indole-3-butyric acid response 5	protein_coding	indole-3-butyric acid response 5	DSPTP1E,DUAL SPECIFICITY PROTEIN PHOSPHATASE 1E	0.818778	4.15902	0.032267
AT3G12360	Ankyrin repeat family protein	protein_coding	INCREASED TOLERANCE TO NACL	NA	0.817724	5.27091	0.025014
AT1G13360	hypothetical protein	protein_coding	NA	NA	0.816939	6.13279	0.028194
AT2G44350	Citrate synthase family protein	protein_coding	NA	NA	0.816219	6.90249	0.022094
AT1G45976	S-ribonuclease binding protein 1	protein_coding	S-ribonuclease binding protein 1	NA	0.815661	3.90162	0.047913
AT5G40650	succinate dehydrogenase 2-2	protein_coding	succinate dehydrogenase 2-2	NA	0.814488	4.86225	0.039787
AT1G04810	26S proteasome regulatory complex%2C non-ATPase subcomplex%2C Rpn2/Psmd1 subunit	protein_coding	NA	NA	0.812899	6.17396	0.036362
AT5G46450	Disease resistance protein (TIR-NBS-LRR class) family	protein_coding	NA	NA	0.811722	4.82245	0.030114
AT1G04850	ubiquitin-associated (UBA)/TS-N domain-containing protein	protein_coding	NA	NA	0.809733	6.26949	0.01682
AT1G66200	hypothetical protein	protein_coding	glutamine synthase clone F11	ATGSR2,glutamine synthase clone F11,GLN1%3B2,glutamine synthetase 1%3B2	0.80581	7.76925	0.023519
AT5G39040	transporter associated with antigen processing protein 2	protein_coding	ATP-binding cassette B27	ALS1,ALUMINUM SENSITIVE 1,ATTAP2,ARABIDOPSIS THALIANA TRANSPORTER ASSOCIATED WITH ANTIGEN PROCESSING PROTEIN 2,AtALS1,TAP2,transporter associated with antigen processing protein 2	0.805205	5.40634	0.019532
AT4G01860	Transducin family protein / WD-40 repeat family protein	protein_coding	NA	NA	0.80414	4.5118	0.039568
AT1G08460	histone deacetylase 8	protein_coding	histone deacetylase 8	ATHDA8,HDA8,HISTONE DEACETYLASE 8	0.803135	4.71546	0.048114
AT2G40860	protein kinase family protein / protein phosphatase 2C ( PP2C) family protein	protein_coding	NA	NA	0.803054	4.29248	0.019567
AT5G51630	Disease resistance protein (TIR-NBS-LRR class) family	protein_coding	NA	NA	0.802358	3.45982	0.045303
AT3G63460	transducin family protein / WD-40 repeat family protein	protein_coding	NA	SEC31B	0.80178	7.4585	0.034302
AT4G31300	N-terminal nucleophile aminohydrolases (Ntn hydrolases) superfamily protein	protein_coding	NA	NA	0.797783	6.65186	0.023519
AT5G35690	zinc metalloproteinase-like protein	protein_coding	NA	NA	0.79635	5.75305	0.027126
AT3G26080	plastid-lipid associated protein PAP / fibrillin family protein	protein_coding	NA	NA	0.796106	4.6405	0.018483
AT3G18350	heat-inducible transcription repressor (DUF639)	protein_coding	NA	NA	0.795926	4.11247	0.036989
AT1G51980	Insulinase (Peptidase family M16) protein	protein_coding	NA	NA	0.795216	7.56098	0.032378
AT2G40890	cytochrome P450%2C family 98%2C subfamily A%2C polypeptide 3	protein_coding	cytochrome P450%2C family 98%2C subfamily A%2C polypeptide 3	REF8,REDUCED EPIDERMAL FLUORESCENCE 8	0.794987	5.25356	0.037269
AT3G53490	valine-tRNA ligase	protein_coding	NA	NA	0.794922	2.22669	0.04684
AT3G19830	Calcium-dependent lipid-binding (CaLB domain) family protein	protein_coding	NA	NA	0.794889	5.66593	0.01623
AT5G19860	transmembrane protein%2C putative (Protein of unknown function%2C DUF538)	protein_coding	NA	NA	0.793604	5.60681	0.02688
AT1G79570	kinase superfamily with octicosapeptide/Phox/Bem1p domain-containing protein	protein_coding	NA	NA	0.791897	5.9887	0.02736
AT5G44090	Calcium-binding EF-hand family protein	protein_coding	NA	NA	0.791787	5.58724	0.044793
AT1G53590	Calcium-dependent lipid-binding (CaLB domain) family protein	protein_coding	NA	NA	0.791479	5.0928	0.039923
AT1G53770	O-fucosyltransferase family protein	protein_coding	NA	NA	0.788276	3.40958	0.019567
AT1G24460	TGN-related%2C localized SYP41 interacting protein	protein_coding	TGN-localized SYP41 interacting protein	NA	0.785559	6.27917	0.046016
AT3G52850	vacuolar sorting receptor homolog 1	protein_coding	vacuolar sorting receptor homolog 1	ATELP1,ATELP,ARABIDOPSIS THALIANA EPIDERMAL GROWTH FACTOR RECEPTOR-LIKE PROTEIN,ATVSR1,BP-80,BP80,BP80-1%3B1,binding protein of 80 kDa 1%3B1,BP80B,GFS1,Green fluorescent seed 1	0.782776	7.2541	0.021481
AT2G01980	sodium proton exchanger%2C putative (NHX7) (SOS1)	protein_coding	SALT OVERLY SENSITIVE 1	ATNHX7,ARABIDOPSIS NA+/H+ ANTIPORTER 7,ATSOS1,ARABIDOPSIS SALT OVERLY SENSITIVE 1	0.782487	4.70975	0.014144
AT5G08680	ATP synthase alpha/beta family protein	protein_coding	NA	NA	0.78144	7.38562	0.019805
AT3G05710	syntaxin of plants 43	protein_coding	syntaxin of plants 43	ATSYP43	0.781377	4.4833	0.021548
AT3G47833	succinate dehydrogenase subunit	protein_coding	succinate dehydrogenase 7	SDH7A,succinate dehydrogenase 7A	0.781286	4.91204	0.018338
AT3G03340	LUC7 related protein	protein_coding	unfertilized embryo sac 6	NA	0.781152	4.60671	0.026542
AT4G29070	Phospholipase A2 family protein	protein_coding	NA	NA	0.780914	5.97656	0.01831
AT1G20110	RING/FYVE/PHD zinc finger superfamily protein	protein_coding	NA	FREE1,FYVE domain protein required for endosomal sorting 1,FYVE1,FYVE-domain protein 1	0.780381	6.30246	0.04961
AT1G03030	P-loop containing nucleoside triphosphate hydrolases superfamily protein	protein_coding	NA	NA	0.779979	3.91443	0.01682
AT4G34640	squalene synthase 1	protein_coding	squalene synthase 1	ERG9	0.779866	5.9055	0.037959
AT5G67290	FAD-dependent oxidoreductase family protein	protein_coding	NA	NA	0.779267	5.00962	0.025457
AT1G32260	envelope glycoprotein	protein_coding	NA	NA	0.7765	3.60403	0.039908
AT1G06650	2-oxoglutarate (2OG) and Fe(II)-dependent oxygenase superfamily protein	protein_coding	NA	NA	0.773395	6.31232	0.017887
AT2G44970	alpha/beta-Hydrolases superfamily protein	protein_coding	NA	NA	0.772762	5.11373	0.028194
AT2G46390	succinate dehydrogenase subunit	protein_coding	succinate dehydrogenase 8	NA	0.770696	5.3591	0.021461
AT4G05530	indole-3-butyric acid response 1	protein_coding	indole-3-butyric acid response 1	SDRA,SHORT-CHAIN DEHYDROGENASE/REDUCTASE A	0.770287	5.24191	0.021376
AT5G62610	basic helix-loop-helix (bHLH) DNA-binding superfamily protein	protein_coding	NA	NA	0.770162	4.96387	0.024409
AT1G11660	heat shock protein 70 (Hsp 70) family protein	protein_coding	NA	NA	0.768038	5.52284	0.022016
AT4G03410	Peroxisomal membrane 22 kDa (Mpv17/PMP22) family protein	protein_coding	NA	NA	0.76572	4.91593	0.020263
AT3G06050	peroxiredoxin IIF	protein_coding	peroxiredoxin IIF	ATPRXIIF,PEROXIREDOXIN IIF	0.763291	6.13239	0.023889
AT1G67250	Proteasome maturation factor UMP1	protein_coding	NA	NA	0.76236	4.90951	0.013019
AT3G59500	Integral membrane HRF1 family protein	protein_coding	NA	NA	0.761546	5.11997	0.020279
AT1G78620	integral membrane protein (Protein of unknown function DUF92%2C transmembrane)	protein_coding	NA	NA	0.75989	6.14971	0.016026
AT4G29040	regulatory particle AAA-ATPase 2A	protein_coding	regulatory particle AAA-ATPase 2A	NA	0.759362	7.27667	0.042739
AT3G66654	Cyclophilin-like peptidyl-prolyl cis-trans isomerase family protein	protein_coding	NA	NA	0.759332	4.95582	0.014778
AT2G47710	Adenine nucleotide alpha hydrolases-like superfamily protein	protein_coding	NA	NA	0.756324	6.70296	0.01646
AT1G65720	transmembrane protein	protein_coding	NA	NA	0.755733	6.36455	0.02139
AT5G37380	Chaperone DnaJ-domain superfamily protein	protein_coding	NA	NA	0.755008	4.18798	0.028404
AT1G27320	histidine kinase 3	protein_coding	histidine kinase 3	AHK3,histidine kinase 3	0.754529	6.63833	0.031012
AT3G56740	Ubiquitin-associated (UBA) protein	protein_coding	NA	NA	0.752798	3.55506	0.027497
AT3G20060	ubiquitin-conjugating enzyme19	protein_coding	ubiquitin-conjugating enzyme19	NA	0.751749	5.52923	0.027039
AT2G46700	CDPK-related kinase 3	protein_coding	CDPK-related kinase 3	ATCRK3	0.751636	3.56896	0.036464
AT5G55100	SWAP (Suppressor-of-White-APricot)/surp domain-containing protein	protein_coding	NA	NA	0.7497	5.36856	0.035943
AT5G20720	chaperonin 20	protein_coding	chaperonin 20	ATCPN21,CHCPN10,CHLOROPLAST CHAPERONIN 10,CPN10,CHLOROPLAST CHAPERONIN 10,CPN21	0.749649	8.97283	0.044684
AT2G43970	RNA-binding protein	protein_coding	La related protein 6b	AtLARP6b	0.74927	9.04903	0.049722
AT1G03970	G-box binding factor 4	protein_coding	G-box binding factor 4	NA	0.74856	4.53918	0.020908
AT5G18420	CCR4-NOT transcription complex subunit	protein_coding	NA	NA	0.747915	4.93924	0.043161
AT2G36835	hypothetical protein	protein_coding	NA	NA	0.747422	5.8614	0.04181
AT5G40670	PQ-loop repeat family protein / transmembrane family protein	protein_coding	NA	NA	0.745909	5.84825	0.018483
AT3G62200	Putative endonuclease or glycosyl hydrolase	protein_coding	NA	NA	0.743712	4.15578	0.037689
AT1G65020	plasma protein	protein_coding	NA	NA	0.742919	4.46595	0.016157
AT5G42890	sterol carrier protein 2	protein_coding	sterol carrier protein 2	ATSCP2,STEROL CARRIER PROTEIN 2	0.742646	5.50261	0.031983
AT5G51050	Mitochondrial substrate carrier family protein	protein_coding	ATP/phosphate carrier 2	NA	0.742322	4.55609	0.047982
AT4G12130	Glycine cleavage T-protein family	protein_coding	NA	NA	0.739701	2.98652	0.029818
AT3G61790	Protein with RING/U-box and TRAF-like domain	protein_coding	NA	NA	0.739348	4.43316	0.047084
AT3G53970	proteasome inhibitor-like protein	protein_coding	NA	NA	0.73882	5.07183	0.013513
AT5G07470	peptidemethionine sulfoxide reductase 3	protein_coding	peptidemethionine sulfoxide reductase 3	ATMSRA3,ARABIDOPSIS THALIANA METHIONINE SULFOXIDE REDUCTASE 3	0.738269	5.78328	0.030114
AT5G05660	NF-X1-type zinc finger protein NFXL2	protein_coding	NFX1-like 2	ATNFXL2,Arabidopsis NF-X like 2,EBI,EARLY BIRD	0.736932	4.84242	0.020986
AT4G36720	HVA22-like protein K	protein_coding	HVA22-like protein K	NA	0.736928	3.62546	0.036642
AT4G38630	regulatory particle non-ATPase 10	protein_coding	regulatory particle non-ATPase 10	ATMCB1,MBP1,MULTIUBIQUITIN CHAIN BINDING PROTEIN 1,MCB1,MULTIUBIQUITIN-CHAIN-BINDING PROTEIN 1	0.736044	6.88092	0.038759
AT1G13060	20S proteasome beta subunit E1	protein_coding	20S proteasome beta subunit E1	NA	0.735853	6.58028	0.024316
AT5G01800	saposin B domain-containing protein	protein_coding	NA	NA	0.733426	5.55603	0.01721
AT3G19950	RING/U-box superfamily protein	protein_coding	NA	NA	0.733376	4.78168	0.04626
AT4G36730	G-box binding factor 1	protein_coding	G-box binding factor 1	AtGBF1	0.733071	5.39756	0.032707
AT1G79210	N-terminal nucleophile aminohydrolases (Ntn hydrolases) superfamily protein	protein_coding	NA	NA	0.732513	5.58624	0.015826
AT5G11770	NADH-ubiquinone oxidoreductase 20 kDa subunit	protein_coding	NA	NA	0.732459	7.10595	0.027703
AT4G29130	hexokinase 1	protein_coding	hexokinase 1	ATHXK1,ARABIDOPSIS THALIANA HEXOKINASE 1,GIN2,GLUCOSE INSENSITIVE 2	0.731297	6.30655	0.035123
AT4G05160	AMP-dependent synthetase and ligase family protein	NA	NA	NA	0.730704	6.02525	0.028589
AT4G38460	geranylgeranyl reductase	protein_coding	geranylgeranyl reductase	AtSSU,SSU,small subunit of Heterodimeric geranyl(geranyl)diphosphate synthase	0.730597	6.14761	0.03197
AT5G10730	NAD(P)-binding Rossmann-fold superfamily protein	protein_coding	NA	NA	0.728402	4.33846	0.032046
AT1G73200	testis-expressed sequence 2-like protein (DUF2404)	protein_coding	NA	NA	0.728201	5.12556	0.031094
AT2G25910	3'-5' exonuclease domain-containing protein / K homology domain-containing protein / KH domain-containing protein	protein_coding	NA	NA	0.726986	5.48995	0.026953
AT1G04440	casein kinase like 13	protein_coding	casein kinase like 13	NA	0.726153	6.00129	0.024332
AT1G72510	DUF1677 family protein (DUF1677)	protein_coding	NA	NA	0.725896	5.7794	0.038571
AT4G21470	riboflavin kinase/FMN hydrolase	protein_coding	riboflavin kinase/FMN hydrolase	ATFMN/FHY,riboflavin kinase/FMN hydrolase	0.724025	4.75205	0.018545
AT2G39550	Prenyltransferase family protein	protein_coding	NA	NA	0.722984	3.96437	0.034305
AT1G80950	Phospholipid/glycerol acyltransferase family protein	protein_coding	NA	NA	0.718861	4.92369	0.023519
AT1G65800	receptor kinase 2	protein_coding	receptor kinase 2	ARK2,receptor kinase 2,AtARK2	0.718382	6.23428	0.039351
AT4G22220	SufE/NifU family protein	protein_coding	NA	NA	0.717641	7.21367	0.019598
AT1G69460	emp24/gp25L/p24 family/GOLD family protein	protein_coding	NA	NA	0.717005	5.71347	0.037204
AT3G49490	hypothetical protein	protein_coding	NA	NA	0.716546	5.90101	0.028194
AT2G02230	phloem protein 2-B1	protein_coding	phloem protein 2-B1	AtPP2-B1,phloem protein 2-B1	0.715969	3.72982	0.047542
AT1G21190	Small nuclear ribonucleoprotein family protein	protein_coding	SM-like 3A	NA	0.71545	4.5278	0.028194
AT5G56190	Transducin/WD40 repeat-like superfamily protein	protein_coding	NA	NA	0.714931	5.04467	0.023519
AT5G67500	voltage dependent anion channel 2	protein_coding	voltage dependent anion channel 2	ATVDAC2,ARABIDOPSIS THALIANA VOLTAGE DEPENDENT ANION CHANNEL 2	0.714391	7.09078	0.046592
AT2G03430	Ankyrin repeat family protein	protein_coding	NA	NA	0.712417	3.28353	0.048434
AT1G78660	gamma-glutamyl hydrolase 1	protein_coding	gamma-glutamyl hydrolase 1	ATGGH1,gamma-glutamyl hydrolase 1	0.709695	5.53366	0.044617
AT4G00860	monopolar spindle protein (DUF1138)	protein_coding	NA	NA	0.709508	5.99867	0.01623
AT3G06190	BTB-POZ and MATH domain 2	protein_coding	BTB-POZ and MATH domain 2	ATBPM2,BTB-POZ AND MATH DOMAIN 2	0.708262	4.99324	0.03123
AT5G16050	general regulatory factor 5	protein_coding	general regulatory factor 5	GF14 UPSILON	0.708171	6.5106	0.015244
AT1G73650	3-oxo-5-alpha-steroid 4-dehydrogenase (DUF1295)	protein_coding	NA	NA	0.705179	5.06085	0.018483
AT3G54300	vesicle-associated membrane protein 727	protein_coding	vesicle-associated membrane protein 727	ATVAMP727,vesicle-associated membrane protein 727	0.705151	5.03511	0.043447
AT1G10920	NB-ARC domain-containing disease resistance protein	protein_coding	LOCUS ORCHESTRATING VICTORIN EFFECTS1	NA	0.704437	3.58864	0.042742
AT4G37460	Tetratricopeptide repeat (TPR)-like superfamily protein	protein_coding	SUPPRESSOR OF RPS4-RLD 1	NA	0.702827	6.00802	0.024008
AT4G01280	Homeodomain-like superfamily protein	protein_coding	NA	NA	0.702444	4.00523	0.040587
AT1G06400	Ras-related small GTP-binding family protein	protein_coding	NA	NA	0.702291	5.06533	0.039779
AT3G21865	peroxin 22	protein_coding	peroxin 22	NA	0.702168	5.09129	0.031557
AT5G67230	Nucleotide-diphospho-sugar transferases superfamily protein	protein_coding	IRREGULAR XYLEM 14-LIKE	I14H,IRREGULAR XYLEM 14 Homolog	0.701302	3.08201	0.046553
AT3G56490	HIS triad family protein 3	protein_coding	HIS triad family protein 3	HINT1,HISTIDINE TRIAD NUCLEOTIDE-BINDING 1	0.701078	5.31065	0.029317
AT3G05940	organic solute transporter ostalpha protein (DUF300)	protein_coding	NA	NA	0.700152	3.29782	0.028404
AT3G27430	N-terminal nucleophile aminohydrolases (Ntn hydrolases) superfamily protein	protein_coding	NA	NA	0.698108	6.24521	0.020263
AT1G64440	NAD(P)-binding Rossmann-fold superfamily protein	protein_coding	ROOT HAIR DEFECTIVE 1	REB1,ROOT EPIDERMAL BULGER1,UGE4,UDP-GLUCOSE 4-EPIMERASE	0.697209	4.27849	0.040743
AT5G64200	serine/arginine-rich splicing factor-like protein%2C putative	protein_coding	ortholog of human splicing factor SC35	ATSC35,ARABIDOPSIS THALIANA ORTHOLOG OF HUMAN SPLICING FACTOR SC35,At-SC35,ortholog of human splicing factor SC35	0.695554	5.40744	0.039568
AT2G42620	RNI-like superfamily protein	protein_coding	MORE AXILLARY BRANCHES 2	AtMAX2,ORE9,ORESARA 9,PPS,PLEIOTROPIC PHOTOSIGNALING	0.69503	4.34448	0.036186
AT2G14880	SWIB/MDM2 domain superfamily protein	protein_coding	NA	NA	0.694587	5.84024	0.045416
AT2G25760	Protein kinase family protein	protein_coding	NA	NA	0.694378	5.89474	0.048281
AT5G03440	zinc finger protein	protein_coding	NA	NA	0.694377	2.56469	0.038256
AT3G27240	Cytochrome C1 family	protein_coding	NA	NA	0.694283	6.54925	0.016157
AT3G47990	SUGAR-INSENSITIVE 3	protein_coding	SUGAR-INSENSITIVE 3	NA	0.692799	4.661	0.02029
AT1G05840	Eukaryotic aspartyl protease family protein	protein_coding	NA	NA	0.692555	4.44157	0.020447
AT1G56460	HIT zinc finger and PAPA-1-like domain-containing protein	protein_coding	NA	NA	0.690096	4.7698	0.021867
AT3G12480	nuclear factor Y%2C subunit C11	protein_coding	nuclear factor Y%2C subunit C11	NA	0.689423	4.67381	0.035523
AT3G63150	MIRO-related GTP-ase 2	protein_coding	MIRO-related GTP-ase 2	ATCBG,CALCIUM BINDING GTP-ASE	0.688877	5.62254	0.019269
AT5G17190	B-cell receptor-associated-like protein	protein_coding	NA	NA	0.688828	6.01325	0.0357
AT4G28060	Cytochrome c oxidase%2C subunit Vib family protein	protein_coding	NA	NA	0.688306	5.31691	0.034869
AT2G44100	guanosine nucleotide diphosphate dissociation inhibitor 1	protein_coding	guanosine nucleotide diphosphate dissociation inhibitor 1	AT-GDI1,ATGDI1,guanosine nucleotide diphosphate dissociation inhibitor 1	0.687316	7.29616	0.028643
AT3G02090	Insulinase (Peptidase family M16) protein	protein_coding	NA	NA	0.686282	8.08009	0.031305
AT1G57765	transmembrane protein	protein_coding	NA	NA	0.684057	3.48669	0.044135
AT5G52580	RabGAP/TBC domain-containing protein	protein_coding	NA	NA	0.682205	5.76855	0.045101
AT4G36195	Serine carboxypeptidase S28 family protein	protein_coding	NA	NA	0.679781	6.34409	0.01623
AT2G20420	ATP citrate lyase (ACL) family protein	protein_coding	NA	NA	0.678298	7.19029	0.042699
AT2G17790	vacuolar protein sorting-associated 35A-like protein	protein_coding	VPS35 homolog A	ZIP3,ZIG suppressor 3	0.677339	5.49972	0.048947
AT5G19280	kinase associated protein phosphatase	protein_coding	kinase associated protein phosphatase	RAG1,ROOT ATTENUATED GROWTH 1	0.677297	4.4994	0.040452
AT1G09920	TRAF-type zinc finger-like protein	protein_coding	NA	NA	0.675761	4.64811	0.031277
AT1G71310	cobalt ion binding protein	NA	NA	NA	0.675016	3.65198	0.026315
AT3G19100	Protein kinase superfamily protein	protein_coding	NA	NA	0.674588	5.15922	0.038422
AT2G44060	Late embryogenesis abundant protein%2C group 2	protein_coding	NA	LEA26,late embryogenesis abundant 26	0.674541	7.77789	0.043351
AT4G10790	UBX domain-containing protein	protein_coding	NA	NA	0.673985	5.76242	0.019269
AT5G49810	methionine S-methyltransferase	protein_coding	methionine S-methyltransferase	NA	0.672852	6.62692	0.045182
AT2G46230	PIN domain-like family protein	protein_coding	NA	NA	0.671633	4.97336	0.025589
AT1G22300	general regulatory factor 10	protein_coding	general regulatory factor 10	14-3-3EPSILON,14-3-3 PROTEIN G-BOX FACTOR14 EPSILON,GF14 EPSILON	0.670716	7.48357	0.032474
AT3G05380	ALWAYS EARLY 2	protein_coding	ALWAYS EARLY 2	ATALY2,ARABIDOPSIS THALIANA ALWAYS EARLY 2	0.668884	4.45327	0.048944
AT2G41700	ATP-binding cassette A1	protein_coding	ATP-binding cassette A1	AtABCA1,Arabidopsis thaliana ATP-binding cassette A1	0.668765	5.70507	0.040283
AT1G25682	coiled-coil protein (DUF572)	protein_coding	NA	NA	0.668051	4.42792	0.048192
AT1G19910	ATPase%2C F0/V0 complex%2C subunit C protein	protein_coding	NA	NA	0.667359	7.23724	0.027133
AT1G16210	coiled-coil protein	protein_coding	NA	NA	0.666419	5.79462	0.032809
AT1G77440	20S proteasome beta subunit C2	protein_coding	20S proteasome beta subunit C2	NA	0.665689	5.19834	0.026479
AT3G15290	3-hydroxyacyl-CoA dehydrogenase family protein	protein_coding	NA	NA	0.663723	4.15113	0.044666
AT1G15880	golgi snare 11	protein_coding	golgi snare 11	atgos11	0.662087	4.36891	0.036915
AT1G21720	proteasome beta subunit C1	protein_coding	proteasome beta subunit C1	NA	0.661433	6.07073	0.021092
AT4G29160	SNF7 family protein	protein_coding	NA	NA	0.660777	6.33565	0.03986
AT4G22260	Alternative oxidase family protein	protein_coding	IMMUTANS	IM1,PTOX,plastid terminal oxidase	0.653485	5.72435	0.044195
AT1G67325	Ran BP2/NZF zinc finger-like superfamily protein	protein_coding	NA	NA	0.650573	4.70251	0.03215
AT4G05420	damaged DNA binding protein 1A	protein_coding	damaged DNA binding protein 1A	NA	0.649403	6.38007	0.038258
AT4G17910	transferases%2C transferring acyl groups	protein_coding	NA	NA	0.647696	3.61973	0.047084
AT5G60160	Zn-dependent exopeptidases superfamily protein	protein_coding	NA	NA	0.643311	5.6375	0.032475
AT5G42740	Sugar isomerase (SIS) family protein	protein_coding	NA	NA	0.643279	6.78081	0.028966
AT5G48810	cytochrome B5 isoform D	NA	NA	ATB5-B,ATCB5-D,ARABIDOPSIS CYTOCHROME B5 ISOFORM D,B5	0.641307	6.73596	0.045039
AT4G37440	hypothetical protein	protein_coding	NA	NA	0.640962	5.25839	0.039912
AT5G54430	Adenine nucleotide alpha hydrolases-like superfamily protein	protein_coding	NA	NA	0.640901	5.70759	0.03233
AT5G42870	phosphatidic acid phosphohydrolase 2	NA	NA	NA	0.639853	5.21054	0.048114
AT4G39850	peroxisomal ABC transporter 1	protein_coding	ATP-binding cassette D1	ACN2,acetate non-utilizing 2,AtABCD1,Arabidopsis thaliana ATP-binding cassette D1,CTS,COMATOSE,PED3,PEROXISOME DEFECTIVE 3,PXA1,peroxisomal ABC transporter 1	0.639493	6.4336	0.036513
AT2G39940	RNI-like superfamily protein	protein_coding	CORONATINE INSENSITIVE 1	NA	0.636414	5.32128	0.018575
AT1G01830	ARM repeat superfamily protein	protein_coding	NA	NA	0.633867	4.12458	0.026315
AT2G30970	aspartate aminotransferase 1	protein_coding	aspartate aminotransferase 1	NA	0.633172	6.54942	0.049231
AT4G21105	cytochrome-c oxidase/ electron carrier	protein_coding	NA	NA	0.630586	6.69406	0.032589
AT3G54840	Ras-related small GTP-binding family protein	protein_coding	NA	NA	0.630441	5.28077	0.032053
AT1G26740	Ribosomal L32p protein family	protein_coding	NA	NA	0.630217	3.51839	0.046624
AT5G13440	Ubiquinol-cytochrome C reductase iron-sulfur subunit	protein_coding	NA	NA	0.629898	6.47286	0.021092
AT2G27350	OTU-like cysteine protease family protein	protein_coding	otubain-like deubiquitinase 1	NA	0.626558	5.43579	0.032053
AT3G51250	Senescence/dehydration-associated protein-like protein	protein_coding	NA	NA	0.626026	5.17912	0.029161
AT4G26240	histone-lysine N-methyltransferase	protein_coding	NA	NA	0.625728	3.30772	0.048233
AT5G05230	RING/U-box superfamily protein	protein_coding	NA	NA	0.624853	3.78346	0.043203
AT1G80360	Pyridoxal phosphate (PLP)-dependent transferases superfamily protein	protein_coding	NA	VAS1,reversal of sav3 phenotype 1	0.621914	5.49319	0.031305
AT5G59830	DNA-binding protein	protein_coding	NA	NA	0.621796	3.90603	0.027094
AT1G62810	Copper amine oxidase family protein	protein_coding	COPPER AMINE OXIDASE1	NA	0.621682	4.02043	0.024442
AT4G37830	cytochrome c oxidase-like protein	protein_coding	NA	NA	0.620818	6.74835	0.030114
AT5G18830	squamosa promoter binding protein-like 7	protein_coding	squamosa promoter binding protein-like 7	ATSPL7,SQUAMOSA PROMOTER BINDING PROTEIN-LIKE 7	0.619899	4.56214	0.025254
AT5G66120	3-dehydroquinate synthase	protein_coding	NA	NA	0.619074	6.7373	0.03342
AT3G06400	chromatin-remodeling protein 11	protein_coding	chromatin-remodeling protein 11	NA	0.617696	6.7329	0.040283
AT3G22850	aluminum induced protein with YGL and LRDR motifs	protein_coding	NA	NA	0.616348	4.58136	0.036212
AT2G18770	P-loop containing nucleoside triphosphate hydrolases superfamily protein	protein_coding	NA	NA	0.61634	3.83506	0.025589
AT3G60820	N-terminal nucleophile aminohydrolases (Ntn hydrolases) superfamily protein	protein_coding	NA	NA	0.615092	6.82713	0.030899
AT1G10500	chloroplast-localized ISCA-like protein	protein_coding	chloroplast-localized ISCA-like protein	ATCPISCA,chloroplast-localized ISCA-like protein	0.609885	6.61553	0.035353
AT3G08650	ZIP metal ion transporter family	protein_coding	NA	NA	0.609752	6.05213	0.042415
AT1G72020	TonB-dependent heme receptor A	protein_coding	NA	NA	0.607906	6.67948	0.032053
AT2G33470	glycolipid transfer protein 1	protein_coding	glycolipid transfer protein 1	ATGLTP1,ARABIDOPSIS GLYCOLIPID TRANSFER PROTEIN 1	0.607113	5.80534	0.043203
AT1G09870	histidine acid phosphatase family protein	protein_coding	NA	NA	0.605336	4.72735	0.023968
AT5G67610	transmembrane protein (DUF2215)	protein_coding	NA	NA	0.603461	4.11164	0.044736
AT4G17940	Tetratricopeptide repeat (TPR)-like superfamily protein	protein_coding	NA	NA	0.599431	4.95197	0.0493
AT2G34040	Apoptosis inhibitory protein 5 (API5)	protein_coding	NA	NA	0.597323	5.67581	0.045039
AT3G04460	peroxin-12	protein_coding	peroxin-12	APM4,ABERRANT PEROXISOME MORPHOLOGY 4,ATPEX12,PEROXIN-12	0.594362	4.11069	0.039912
AT1G54490	exoribonuclease 4	protein_coding	exoribonuclease 4	AIN1,ACC INSENSITIVE 1,ATXRN4,EXORIBONUCLEASE 4,EIN5,ETHYLENE INSENSITIVE 5	0.594186	5.63485	0.028557
AT3G04500	RNA-binding (RRM/RBD/RNP motifs) family protein	protein_coding	NA	NA	0.592914	4.9247	0.020908
AT3G03720	cationic amino acid transporter 4	protein_coding	cationic amino acid transporter 4	AtCAT4	0.59222	5.14356	0.034869
AT1G80230	Rubredoxin-like superfamily protein	protein_coding	NA	NA	0.591515	5.20889	0.035886
AT2G27730	copper ion binding protein	protein_coding	NA	NA	0.588955	6.18962	0.03443
AT3G14205	Phosphoinositide phosphatase family protein	protein_coding	NA	SAC2,suppressor of actin 2	0.588835	5.90784	0.038524
AT4G19510	Disease resistance protein (TIR-NBS-LRR class)	protein_coding	NA	NA	0.588428	5.76432	0.048947
AT5G61500	autophagy 3 (APG3)	protein_coding	NA	NA	0.587558	5.15946	0.049709
AT1G06130	glyoxalase 2-4	protein_coding	glyoxalase 2-4	NA	0.587009	4.82771	0.038289
AT4G16150	calmodulin-binding transcription activator 5	protein_coding	NA	NA	0.583531	6.19088	0.034251
AT4G02120	CTP synthase family protein	protein_coding	NA	NA	0.583517	5.82579	0.042534
AT3G59920	RAB GDP dissociation inhibitor 2	protein_coding	RAB GDP dissociation inhibitor 2	ATGDI2,RAB GDP dissociation inhibitor 2	0.58292	7.12451	0.04439
AT5G11430	SPOC domain / Transcription elongation factor S-II protein	protein_coding	NA	NA	0.582147	4.23489	0.026615
AT1G77220	organic solute transporter ostalpha protein (DUF300)	protein_coding	NA	NA	0.581408	4.2307	0.032378
AT3G58640	Mitogen activated protein kinase kinase kinase-like protein	protein_coding	NA	NA	0.578432	6.16862	0.036989
AT3G61070	peroxin 11E	protein_coding	peroxin 11E	NA	0.574697	5.08131	0.0407
AT1G75560	zinc knuckle (CCHC-type) family protein	protein_coding	NA	NA	0.573161	5.07166	0.049554
AT1G07510	FTSH protease 10	protein_coding	FTSH protease 10	NA	0.570722	5.25954	0.047084
AT2G17190	ubiquitin family protein	protein_coding	NA	DSK2a	0.567685	6.26085	0.035353
AT2G23090	Uncharacterized protein family SERF	protein_coding	NA	NA	0.565903	7.09813	0.031277
AT2G02050	NADH-ubiquinone oxidoreductase B18 subunit	protein_coding	NA	NA	0.565259	5.70249	0.031983
AT4G29790	serine/arginine repetitive matrix protein	protein_coding	NA	NA	0.565129	4.96884	0.043351
AT5G61840	Exostosin family protein	protein_coding	NA	NA	0.561943	4.82618	0.033684
AT5G57860	Ubiquitin-like superfamily protein	protein_coding	NA	NA	0.560575	3.56075	0.039445
AT1G23780	F-box family protein	protein_coding	NA	NA	0.5601	5.02284	0.041817
AT5G55310	DNA topoisomerase 1 beta	protein_coding	DNA topoisomerase 1 beta	TOP1,TOPOISOMERASE 1	0.557059	5.68841	0.025981
AT3G05545	RING/U-box superfamily protein	protein_coding	NA	NA	0.55547	5.85169	0.045003
AT3G52030	F-box family protein with WD40/YVTN repeat doamin	protein_coding	NA	NA	0.555357	4.12687	0.041215
AT2G20820	hypothetical protein	protein_coding	NA	NA	0.554849	6.54782	0.04348
AT2G27900	coiled-coil protein	protein_coding	NA	NA	0.554612	6.03853	0.047084
AT1G23900	gamma-adaptin 1	protein_coding	gamma-adaptin 1	Gamma-ADR,Gamma-adaptin	0.553132	5.65927	0.04586
AT1G05790	lipase class 3 family protein	protein_coding	NA	NA	0.55309	4.69252	0.03992
AT2G44610	Ras-related small GTP-binding family protein	protein_coding	NA	NA	0.552222	6.19659	0.039787
AT3G49390	CTC-interacting domain 10	protein_coding	CTC-interacting domain 10	NA	0.552063	5.28569	0.045982
AT5G39730	AIG2-like (avirulence induced gene) family protein	protein_coding	NA	NA	0.54922	4.92817	0.044578
AT2G04880	zinc-dependent activator protein-1	protein_coding	zinc-dependent activator protein-1	ATWRKY1,WRKY1	0.545185	5.15906	0.032958
AT5G60170	RNA binding (RRM/RBD/RNP motifs) family protein	protein_coding	NA	NA	0.543698	6.24209	0.042202
AT4G25550	Cleavage/polyadenylation specificity factor%2C 25kDa subunit	protein_coding	NA	NA	0.543564	5.34399	0.041669
AT4G38640	Plasma-membrane choline transporter family protein	protein_coding	NA	NA	0.543313	4.87258	0.036989
AT5G67590	NADH-ubiquinone oxidoreductase-like protein	protein_coding	FROSTBITE1	NA	0.541859	6.51542	0.037959
AT2G27100	C2H2 zinc-finger protein SERRATE (SE)	protein_coding	SERRATE	NA	0.540648	5.60076	0.043985
AT4G11800	Calcineurin-like metallo-phosphoesterase superfamily protein	protein_coding	NA	NA	0.54018	5.14275	0.046664
AT5G35590	proteasome alpha subunit A1	protein_coding	proteasome alpha subunit A1	NA	0.539039	6.32241	0.031711
AT5G43280	delta(3%2C5)%2Cdelta(2%2C4)-dienoyl-CoA isomerase 1	protein_coding	delta(3%2C5)%2Cdelta(2%2C4)-dienoyl-CoA isomerase 1	ATDCI1,delta(3,5),delta(2,4)-dienoyl-CoA isomerase 1	0.537533	4.63122	0.031532
AT2G21270	ubiquitin fusion degradation 1	protein_coding	ubiquitin fusion degradation 1	NA	0.535485	5.70723	0.028194
AT3G06350	dehydroquinate dehydratase%2C putative / shikimate dehydrogenase	protein_coding	MATERNAL EFFECT EMBRYO ARREST 32	EMB3004,EMBRYO DEFECTIVE 3004	0.534067	6.17154	0.046624
AT1G65430	IBR domain-containing protein	protein_coding	ARIADNE 8	ATARI8,ARABIDOPSIS ARIADNE 8	0.533	5.25478	0.033252
AT1G20225	Thioredoxin superfamily protein	protein_coding	NA	NA	0.52381	5.17242	0.045876
AT2G39780	ribonuclease 2	protein_coding	ribonuclease 2	NA	0.523799	5.55959	0.044684
AT3G14830	epstein-barr nuclear antigen	protein_coding	NA	NA	0.521718	4.46439	0.044413
AT3G56460	GroES-like zinc-binding alcohol dehydrogenase family protein	protein_coding	NA	NA	0.513861	6.29927	0.049554
AT1G48970	NagB/RpiA/CoA transferase-like superfamily protein	protein_coding	NA	NA	0.513307	4.05645	0.04182
AT3G18860	transducin family protein / WD-40 repeat family protein	protein_coding	NA	NA	0.512241	5.73342	0.036818
AT5G38470	Rad23 UV excision repair protein family	protein_coding	RADIATION SENSITIVE23D	NA	0.503675	6.65788	0.042412
AT4G39910	ubiquitin-specific protease 3	protein_coding	ubiquitin-specific protease 3	ATUBP3,ubiquitin-specific protease 3	0.502304	4.89844	0.047509
AT3G18410	NADH dehydrogenase ubiquinone 1 beta subcomplex subunit 10-B-like protein (Complex I subunit NDUFS6)	protein_coding	NA	NA	0.496559	5.74223	0.048032
AT5G35730	EXS (ERD1/XPR1/SYG1) family protein	protein_coding	NA	NA	0.481249	4.74841	0.047084
AT5G16440	isopentenyl diphosphate isomerase 1	protein_coding	isopentenyl diphosphate isomerase 1	NA	0.454732	5.10267	0.047084
AT5G06260	TLD-domain containing nucleolar protein	protein_coding	NA	NA	0.450913	5.1936	0.046624
AT3G47350	hydroxysteroid dehydrogenase 2	protein_coding	hydroxysteroid dehydrogenase 2	ATHSD2,HYDROXYSTEROID DEHYDROGENASE 2	-0.467	6.10764	0.041714
AT5G67130	PLC-like phosphodiesterases superfamily protein	protein_coding	NA	NA	-0.47456	4.8443	0.048212
AT1G28420	homeobox-1	protein_coding	homeobox-1	RLT1,RINGLET 1	-0.48339	5.64003	0.035332
AT5G04280	RNA-binding (RRM/RBD/RNP motifs) family protein with retrovirus zinc finger-like domain-containing protein	protein_coding	AtRZ-1c	RZ-1c,RZ-1c	-0.48976	5.09038	0.042534
AT5G47490	RGPR-like protein	protein_coding	NA	NA	-0.49851	4.86954	0.040608
AT3G10810	zinc finger (C3HC4-type RING finger) family protein	protein_coding	NA	NA	-0.4998	4.59555	0.048947
AT5G47780	galacturonosyltransferase 4	protein_coding	galacturonosyltransferase 4	NA	-0.51582	6.18281	0.049554
AT5G55670	RNA-binding (RRM/RBD/RNP motifs) family protein	protein_coding	NA	NA	-0.51678	4.66889	0.048539
AT2G40980	Protein kinase superfamily protein	protein_coding	NA	NA	-0.51849	4.04847	0.042754
AT3G52660	RNA-binding (RRM/RBD/RNP motifs) family protein	protein_coding	NA	NA	-0.51896	4.38499	0.041886
AT5G09860	nuclear matrix protein-like protein	protein_coding	NA	NA	-0.52873	4.71952	0.039787
AT2G28360	SIT4 phosphatase-associated family protein	protein_coding	NA	NA	-0.53549	4.74145	0.047913
AT3G46820	type one serine/threonine protein phosphatase 5	protein_coding	type one serine/threonine protein phosphatase 5	NA	-0.53982	3.99124	0.038875
AT3G33520	actin-related protein 6	protein_coding	actin-related protein 6	ATARP6,actin-related protein 6,ESD1,EARLY IN SHORT DAYS 1,SUF3,SUPPRESSOR OF FRI 3	-0.56007	4.17577	0.047308
AT5G42520	basic pentacysteine 6	protein_coding	basic pentacysteine 6	ATBPC6,ARABIDOPSIS THALIANA BASIC PENTACYSTEINE 6,BBR/BPC6	-0.56235	4.71681	0.045116
AT3G02600	lipid phosphate phosphatase 3	protein_coding	lipid phosphate phosphatase 3	ATLPP3,LIPID PHOSPHATE PHOSPHATASE 3	-0.58024	4.82232	0.030899
AT5G32450	RNA binding (RRM/RBD/RNP motifs) family protein	protein_coding	NA	NA	-0.58458	5.53612	0.037669
AT5G10030	TGACG motif-binding factor 4	protein_coding	TGACG motif-binding factor 4	OBF4,OCS ELEMENT BINDING FACTOR 4	-0.59252	3.47303	0.042699
AT4G24100	Protein kinase superfamily protein	protein_coding	NA	NA	-0.593	3.83429	0.041472
AT5G47750	D6 protein kinase like 2	protein_coding	D6 protein kinase like 2	PK5	-0.59631	4.75491	0.048261
AT5G59870	histone H2A 6	protein_coding	histone H2A 6	h2a.w.6	-0.59711	4.5167	0.045166
AT3G54350	Forkhead-associated (FHA) domain-containing protein	protein_coding	embryo defective 1967	NA	-0.60311	4.82465	0.034348
AT1G50710	HAUS augmin-like complex subunit	protein_coding	augmin subunit 4	NA	-0.60328	3.6133	0.031557
AT4G27870	Vacuolar iron transporter (VIT) family protein	protein_coding	NA	NA	-0.60716	5.97488	0.023533
AT2G35155	Trypsin family protein	protein_coding	NA	NA	-0.60918	4.45209	0.048791
AT5G03520	RAB GTPase homolog 8C	protein_coding	RAB GTPase homolog 8C	ATRAB-E1D,ARABIDOPSIS RAB HOMOLOG E1D,ATRAB8C,RAB GTPase homolog 8C,ATRABE1D,RAB-E1D,RAB HOMOLOG E1D	-0.61057	5.3599	0.041188
AT3G51270	protein serine/threonine kinase	protein_coding	NA	NA	-0.61687	4.98471	0.033691
AT2G17150	Plant regulator RWP-RK family protein	protein_coding	NA	NLP1,NIN-like protein 1	-0.62009	3.31632	0.044413
AT4G28760	methyl-coenzyme M reductase II subunit gamma%2C putative (DUF3741)	protein_coding	TON1 Recruiting Motif 20	NA	-0.62213	5.57255	0.045982
AT5G23720	dual specificity protein phosphatase family protein	protein_coding	PROPYZAMIDE-HYPERSENSITIVE 1	NA	-0.62534	3.63436	0.04827
AT4G39170	Sec14p-like phosphatidylinositol transfer family protein	protein_coding	NA	NA	-0.64247	5.51895	0.035551
AT1G72050	transcription factor IIIA	protein_coding	transcription factor IIIA	NA	-0.64375	4.96272	0.033556
AT5G26940	Polynucleotidyl transferase%2C ribonuclease H-like superfamily protein	protein_coding	defective in pollen organelle DNA degradation1	NA	-0.64395	3.80239	0.041188
AT5G06210	RNA binding (RRM/RBD/RNP motifs) family protein	protein_coding	NA	S-RBP11,small RNA-binding protein 11	-0.64566	3.45437	0.039568
AT1G49560	Homeodomain-like superfamily protein	protein_coding	NA	NA	-0.64981	4.48729	0.047905
AT3G18160	peroxin 3-1	protein_coding	peroxin 3-1	NA	-0.65009	3.91762	0.026479
AT1G73930	polarity axis stabilization protein	protein_coding	NA	NA	-0.65367	4.43559	0.03992
AT4G23440	Disease resistance protein (TIR-NBS class)	protein_coding	NA	NA	-0.65384	3.254	0.041668
AT1G02280	translocon at the outer envelope membrane of chloroplasts 33	protein_coding	translocon at the outer envelope membrane of chloroplasts 33	ATTOC33,PPI1,PLASTID PROTEIN IMPORT 1	-0.65394	5.9415	0.049954
AT2G28380	dsRNA-binding protein 2	protein_coding	dsRNA-binding protein 2	NA	-0.65697	4.93454	0.025036
AT1G58440	FAD/NAD(P)-binding oxidoreductase family protein	protein_coding	NA	NA	-0.65985	5.27111	0.036563
AT1G13380	sodium/hydrogen exchanger (DUF1218)	protein_coding	NA	NA	-0.65997	3.66999	0.036642
AT5G65685	UDP-Glycosyltransferase superfamily protein	protein_coding	NA	NA	-0.66403	5.1163	0.045948
AT4G10620	P-loop containing nucleoside triphosphate hydrolases superfamily protein	protein_coding	NA	NA	-0.66453	3.33945	0.047178
AT2G14530	TRICHOME BIREFRINGENCE-LIKE 13	protein_coding	TRICHOME BIREFRINGENCE-LIKE 13	NA	-0.66683	3.33844	0.04232
AT3G26950	transmembrane protein	protein_coding	NA	NA	-0.66769	4.70181	0.040402
AT4G14360	S-adenosyl-L-methionine-dependent methyltransferases superfamily protein	protein_coding	NA	NA	-0.66828	5.95894	0.044148
AT1G47240	NRAMP metal ion transporter 2	protein_coding	NRAMP metal ion transporter 2	ATNRAMP2	-0.66921	4.47628	0.039863
AT2G25800	elongation factor Ts (DUF810)	protein_coding	NA	NA	-0.67098	5.37301	0.016322
AT5G41370	DNA repair helicase XPB1-like protein	protein_coding	homolog of xeroderma pigmentosum complementation group B 1	ATXPB1,ARABIDOPSIS HOMOLOG OF XERODERMA PIGMENTOSUM COMPLEMENTATION GROUP B 1	-0.67429	5.00122	0.038274
AT3G55360	3-oxo-5-alpha-steroid 4-dehydrogenase family protein	protein_coding	ECERIFERUM 10	ATTSC13,ECR,ENOYL-COA REDUCTASE,GLH6,GLASSY HAIR 6,TSC13	-0.67538	5.68971	0.036818
AT5G15920	structural maintenance of chromosomes 5	protein_coding	structural maintenance of chromosomes 5	EMB2782,EMBRYO DEFECTIVE 2782	-0.67657	3.57079	0.030114
AT5G62980	Dihydroneopterin aldolase	protein_coding	NA	NA	-0.67849	3.87682	0.041081
AT4G32350	Regulator of Vps4 activity in the MVB pathway protein	protein_coding	NA	NA	-0.67964	3.83876	0.027154
AT2G40760	Rhodanese/Cell cycle control phosphatase superfamily protein	protein_coding	NA	NA	-0.6867	4.3484	0.047913
AT4G32400	Mitochondrial substrate carrier family protein	protein_coding	SODIUM HYPERSENSITIVE 1	ATBT1,ARABIDOPSIS THALIANA BRITTLE 1,EMB104,EMBRYO DEFECTIVE 104,EMB42,EMBRYO DEFECTIVE 42	-0.68763	4.55629	0.036362
AT1G29790	S-adenosyl-L-methionine-dependent methyltransferases superfamily protein	protein_coding	NA	NA	-0.68826	4.27744	0.019805
AT2G26470	embryonic stem cell-specific 5-hydroxymethylcytosine-binding protein	protein_coding	NA	NA	-0.69137	2.94837	0.048732
AT2G34780	maternal effect embryo arrest 22	protein_coding	MATERNAL EFFECT EMBRYO ARREST 22	EMB1611,EMBRYO DEFECTIVE 1611	-0.69157	4.43318	0.03801
AT1G31120	K+ uptake permease 10	protein_coding	K+ uptake permease 10	NA	-0.69483	4.35324	0.036282
AT1G15660	centromere protein C	protein_coding	centromere protein C	NA	-0.69784	2.79022	0.04779
AT5G16730	weak chloroplast movement under blue light protein (DUF827)	protein_coding	NA	NA	-0.7002	5.89487	0.041689
AT1G31360	RECQ helicase L2	protein_coding	RECQ helicase L2	ATRECQ2,ARABIDOPSIS THALIANA RECQ2,MED34	-0.70138	3.30913	0.043774
AT4G31920	response regulator 10	protein_coding	response regulator 10	ARR10,response regulator 10	-0.70257	4.08545	0.023447
AT2G04378	Beta-galactosidase related protein	protein_coding	NA	NA	-0.70337	5.07548	0.037652
AT4G27050	F-box/RNI-like superfamily protein	protein_coding	NA	NA	-0.70345	3.39988	0.033851
AT3G59420	crinkly4	protein_coding	crinkly4	ACR4,crinkly4	-0.70483	3.27477	0.039032
AT3G02950	Tho complex subunit 7/Mft1p	protein_coding	NA	NA	-0.70553	3.70363	0.036428
AT3G15520	Cyclophilin-like peptidyl-prolyl cis-trans isomerase family protein	protein_coding	NA	NA	-0.70621	6.59469	0.048434
AT1G72630	ELF4-like 2	protein_coding	ELF4-like 2	NA	-0.70749	3.66133	0.040402
AT3G02750	Protein phosphatase 2C family protein	protein_coding	NA	NA	-0.7097	6.11388	0.026479
AT5G14790	ARM repeat superfamily protein	protein_coding	NA	NA	-0.7114	4.43554	0.045474
AT5G65930	kinesin-like calmodulin-binding protein (ZWICHEL)	protein_coding	ZWICHEL	KCBP,KINESIN-LIKE CALMODULIN-BINDING PROTEIN,PKCBP,POTATO KINESIN-LIKE CALMODULIN-BINDING PROTEIN	-0.71272	5.09187	0.016322
AT5G14440	Surfeit locus protein 2 (SURF2)	protein_coding	NA	NA	-0.71478	4.32085	0.037269
AT3G02630	Plant stearoyl-acyl-carrier-protein desaturase family protein	protein_coding	NA	NA	-0.71678	5.96345	0.046624
AT1G12850	Phosphoglycerate mutase family protein	protein_coding	NA	NA	-0.71704	5.15145	0.019126
AT2G04280	calcium ion-binding protein	protein_coding	NA	NA	-0.71784	5.9208	0.040148
AT2G03340	WRKY DNA-binding protein 3	protein_coding	WRKY DNA-binding protein 3	NA	-0.72053	5.12057	0.018948
AT1G55270	Galactose oxidase/kelch repeat superfamily protein	protein_coding	NA	NA	-0.72096	3.7279	0.047084
AT2G20300	Protein kinase superfamily protein	protein_coding	Abnormal Leaf Shape 2	NA	-0.72097	4.30338	0.032267
AT5G05820	Nucleotide-sugar transporter family protein	protein_coding	NA	NA	-0.72228	4.2644	0.028608
AT5G61330	rRNA processing protein-like protein	protein_coding	NA	NA	-0.72344	4.67702	0.019567
AT1G03560	Pentatricopeptide repeat (PPR-like) superfamily protein	protein_coding	NA	NA	-0.72491	3.01173	0.044738
AT5G55230	microtubule-associated proteins 65-1	protein_coding	microtubule-associated proteins 65-1	ATMAP65-1,microtubule-associated proteins 65-1	-0.72946	6.17559	0.044978
AT1G74720	C2 calcium/lipid-binding plant phosphoribosyltransferase family protein	protein_coding	QUIRKY	NA	-0.72983	5.22323	0.048476
AT1G08010	GATA transcription factor 11	protein_coding	GATA transcription factor 11	NA	-0.73233	3.58626	0.047143
AT5G59950	RNA-binding (RRM/RBD/RNP motifs) family protein	protein_coding	NA	NA	-0.73401	5.51104	0.04984
AT3G14650	cytochrome P450%2C family 72%2C subfamily A%2C polypeptide 11	protein_coding	cytochrome P450%2C family 72%2C subfamily A%2C polypeptide 11	NA	-0.73519	6.95884	0.04578
AT5G62890	Xanthine/uracil permease family protein	protein_coding	NA	NA	-0.73624	6.95269	0.028936
AT2G41650	hypothetical protein	protein_coding	NA	NA	-0.73713	3.33886	0.032149
AT4G12750	Homeodomain-like transcriptional regulator	protein_coding	NA	NA	-0.73739	4.3146	0.023073
AT5G06680	spindle pole body component 98	protein_coding	spindle pole body component 98	ATGCP3,ARABIDOPSIS THALIANA GAMMA TUBULIN COMPLEX PROTEIN 3,ATSPC98,SPINDLE POLE BODY COMPONENT 98,GCP3,GAMMA TUBULIN COMPLEX PROTEIN 3	-0.73847	3.30863	0.041923
AT1G30910	Molybdenum cofactor sulfurase family protein	protein_coding	NA	NA	-0.74431	4.92675	0.028661
AT5G17550	peroxin 19-2	protein_coding	peroxin 19-2	AtPEX19-2	-0.74983	4.28128	0.018483
AT1G60660	cytochrome B5-like protein	NA	NA	ATCB5LP,ARABIDOPSIS CYTOCHROME B5-LIKE PROTEIN,B5	-0.75307	3.17482	0.049554
AT4G39990	RAB GTPase homolog A4B	protein_coding	RAB GTPase homolog A4B	ATGB3,GTP-BINDING PROTEIN 3,ATRAB11G,ATRABA4B,ARABIDOPSIS THALIANA RAB GTPASE HOMOLOG A 4B	-0.75323	4.68054	0.040743
AT5G48830	phosphoglycolate phosphatase	protein_coding	NA	NA	-0.75364	4.98846	0.042754
AT1G68790	little nuclei3	protein_coding	LITTLE NUCLEI3	CRWN3,CROWDED NUCLEI 3	-0.75466	5.59192	0.036897
AT2G23760	BEL1-like homeodomain 4	protein_coding	BEL1-like homeodomain 4	SAW2,SAWTOOTH 2	-0.7559	5.80735	0.02636
AT1G76630	Tetratricopeptide repeat (TPR)-like superfamily protein	protein_coding	NA	NA	-0.75695	4.60116	0.019681
AT1G30240	proline-%2C glutamic acid/leucine-rich protein	protein_coding	NA	NA	-0.75727	3.71461	0.044793
AT1G08510	fatty acyl-ACP thioesterases B	protein_coding	fatty acyl-ACP thioesterases B	NA	-0.76643	6.31588	0.020485
AT4G00990	Transcription factor jumonji (jmjC) domain-containing protein	protein_coding	NA	NA	-0.76755	4.18833	0.047084
AT1G53290	Galactosyltransferase family protein	protein_coding	NA	NA	-0.769	3.53247	0.029733
AT4G17190	farnesyl diphosphate synthase 2	protein_coding	farnesyl diphosphate synthase 2	NA	-0.76928	4.51321	0.018842
AT4G10280	RmlC-like cupins superfamily protein	protein_coding	NA	NA	-0.76973	2.33634	0.04296
AT5G09380	RNA polymerase III RPC4	protein_coding	NA	NA	-0.77328	2.57446	0.038289
AT1G06150	basic helix loop helix (bHLH) DNA-binding superfamily protein	protein_coding	EMBRYO DEFECTIVE 1444	LHL1,LONESOME HIGHWAY LIKE 1	-0.77423	5.16494	0.042664
AT4G10170	SNARE-like superfamily protein	protein_coding	NA	NA	-0.77527	2.83525	0.049646
AT1G51570	Calcium-dependent lipid-binding (CaLB domain) plant phosphoribosyltransferase family protein	protein_coding	NA	NA	-0.77794	6.40077	0.030614
AT1G22910	RNA-binding (RRM/RBD/RNP motifs) family protein	protein_coding	NA	NA	-0.77822	3.92431	0.02619
AT1G34418	other_RNA	other_rna	NA	NA	-0.77856	4.15683	0.034946
AT2G01170	bidirectional amino acid transporter 1	protein_coding	bidirectional amino acid transporter 1	AtGABP,GABP,GABA permease	-0.77969	5.23631	0.044578
AT2G01070	Lung seven transmembrane receptor family protein	protein_coding	NA	NA	-0.78026	4.15917	0.021376
AT5G54090	DNA mismatch repair protein MutS%2C type 2	protein_coding	NA	NA	-0.78056	3.65701	0.040883
AT3G21100	RNA-binding (RRM/RBD/RNP motifs) family protein	protein_coding	NA	NA	-0.78339	2.8656	0.037227
AT5G47190	Ribosomal protein L19 family protein	protein_coding	NA	NA	-0.78344	7.67398	0.043203
AT1G10200	GATA type zinc finger transcription factor family protein	protein_coding	WLIM1	AtWLIM1	-0.78346	6.2077	0.040787
AT2G16380	Sec14p-like phosphatidylinositol transfer family protein	protein_coding	NA	NA	-0.78843	4.19998	0.03443
AT5G64420	DNA polymerase V family	protein_coding	NA	NA	-0.78888	5.49873	0.04779
AT1G75540	salt tolerance homolog2	protein_coding	B-box domain protein 21	AtBBX21,B BOX 21,LHUS,long hypocotyl under shade,STH2,salt tolerance homolog2	-0.78923	4.10813	0.040651
AT2G40630	Uncharacterized conserved protein (UCP030365)	protein_coding	NA	NA	-0.78995	3.25596	0.020144
AT4G27230	histone H2A 2	protein_coding	histone H2A 2	NA	-0.79063	4.52276	0.046347
AT5G08390	Transducin/WD40 repeat-like superfamily protein	protein_coding	NA	NA	-0.79145	4.64731	0.026385
AT2G42880	MAP kinase 20	protein_coding	MAP kinase 20	ATMPK20,MAP kinase 20	-0.79173	6.34992	0.015137
AT3G62110	Pectin lyase-like superfamily protein	protein_coding	NA	NA	-0.7919	4.88903	0.032605
AT1G05200	glutamate receptor 3.4	protein_coding	glutamate receptor 3.4	ATGLR3.4,glutamate receptor 3.4,GLUR3	-0.7929	6.4426	0.047084
AT2G26910	pleiotropic drug resistance 4	protein_coding	ATP-binding cassette G32	ATPDR4,PLEIOTROPIC DRUG RESISTANCE 4,AtABCG32,PDR4,pleiotropic drug resistance 4,PEC1,PERMEABLE CUTICLE 1	-0.79498	6.78565	0.024008
AT2G02790	IQ-domain 29	protein_coding	IQ-domain 29	NA	-0.79592	3.55393	0.030315
AT3G23760	transferring glycosyl group transferase	protein_coding	NA	NA	-0.79673	4.07001	0.01704
AT5G55790	hypothetical protein	protein_coding	NA	NA	-0.79725	4.22263	0.016026
AT1G10930	DNA helicase (RECQl4A)	protein_coding	NA	NA	-0.79787	4.06394	0.024694
AT1G22690	Gibberellin-regulated family protein	protein_coding	NA	NA	-0.80052	4.67083	0.035186
AT3G29185	glutamate NMDA receptor subunit epsilon-1%2C putative (DUF3598)	protein_coding	NA	NA	-0.80053	5.95236	0.042534
AT3G58470	nucleic acid binding / methyltransferase	protein_coding	NA	NA	-0.80162	3.41286	0.038093
AT3G50740	UDP-glucosyl transferase 72E1	protein_coding	UDP-glucosyl transferase 72E1	NA	-0.80343	4.40715	0.023677
AT1G16860	Ubiquitin-specific protease family C19-related protein	protein_coding	NA	NA	-0.80345	5.22209	0.020991
AT4G18820	AAA-type ATPase family protein	protein_coding	NA	NA	-0.80473	4.62017	0.01623
AT3G63190	ribosome recycling factor%2C chloroplast precursor	protein_coding	ribosome recycling factor%2C chloroplast precursor	AtcpRRF,Arabidopsis thaliana chloroplast ribosome recycling factor,HFP108,HIGH CHLOROPHYLL FLUORESCENCE AND PALE GREEN MUTANT 108,cpRRF,chloroplast ribosome recycling factor	-0.80581	7.29266	0.043985
AT1G53300	tetratricopetide-repeat thioredoxin-like 1	protein_coding	tetratricopeptide-repeat thioredoxin-like 1	NA	-0.80623	5.82285	0.039067
AT2G04890	SCARECROW-like 21	protein_coding	SCARECROW-like 21	NA	-0.8101	3.2577	0.043762
AT1G22970	cyclin-D1-binding protein	protein_coding	NA	NA	-0.81226	3.75194	0.044413
AT5G25510	Protein phosphatase 2A regulatory B subunit family protein	protein_coding	NA	NA	-0.81321	4.84611	0.041472
AT1G74800	Galactosyltransferase family protein	protein_coding	NA	NA	-0.81322	3.83287	0.032664
AT4G38580	farnesylated protein 6	protein_coding	farnesylated protein 6	ATFP6,farnesylated protein 6,HIPP26,HEAVY METAL ASSOCIATED ISOPRENYLATED PLANT PROTEIN 26	-0.81519	3.43674	0.039568
AT3G23310	AGC (cAMP-dependent%2C cGMP-dependent and protein kinase C) kinase family protein	protein_coding	NA	NA	-0.81537	4.7587	0.042399
AT4G33740	myb-like protein X	protein_coding	NA	NA	-0.81559	4.25061	0.043114
AT5G57210	Ypt/Rab-GAP domain of gyp1p superfamily protein	protein_coding	NA	NA	-0.81711	3.89462	0.013444
AT4G32330	TPX2 (targeting protein for Xklp2) protein family	protein_coding	NA	NA	-0.8201	6.37896	0.046235
AT4G37300	maternal effect embryo arrest 59	protein_coding	maternal effect embryo arrest 59	NA	-0.82062	6.54196	0.039908
AT5G45560	Pleckstrin homology (PH) domain-containing protein / lipid-binding START domain-containing protein	protein_coding	NA	NA	-0.82115	2.80955	0.026045
AT1G79790	Haloacid dehalogenase-like hydrolase (HAD) superfamily protein	protein_coding	flavin mononucleotide hydrolase 1	AtcpFHy1,Arabidopsis thaliana chloroplast FMN hydrolase 1	-0.8228	5.70288	0.048731
AT1G25470	AP2 domain-containing transcription factor family protein	protein_coding	cytokinin response factor 12	NA	-0.82365	3.07985	0.027696
AT3G57710	Protein kinase superfamily protein	protein_coding	NA	RKS1,Resistance related KinaSe 1	-0.82773	3.40425	0.047857
AT1G68760	nudix hydrolase 1	protein_coding	nudix hydrolase1	ATNUDT1,ARABIDOPSIS THALIANA NUDIX HYDROLASE HOMOLOG 1,ATNUDX1,nudix hydrolase1	-0.82835	2.46115	0.04296
AT5G01950	Leucine-rich repeat protein kinase family protein	protein_coding	NA	NA	-0.83026	4.96865	0.040743
AT2G21630	Sec23/Sec24 protein transport family protein	protein_coding	NA	NA	-0.8304	3.28209	0.043203
AT1G78040	Pollen Ole e 1 allergen and extensin family protein	protein_coding	NA	NA	-0.83421	8.19165	0.042415
AT4G28010	Tetratricopeptide repeat (TPR)-like superfamily protein	protein_coding	NA	RPF5,RNA processing factor 5	-0.83503	2.05757	0.038422
AT5G49945	hypothetical protein (DUF1682)	protein_coding	NA	NA	-0.83555	4.03153	0.033433
AT2G29050	RHOMBOID-like 1	protein_coding	RHOMBOID-like 1	ATRBL1,RHOMBOID-like 1	-0.83574	2.5618	0.032399
AT5G17620	nuclear matrix protein	protein_coding	augmin subunit 7	NA	-0.83683	2.9056	0.023447
AT4G07410	Transducin family protein / WD-40 repeat family protein	protein_coding	POPCORN	NA	-0.83723	5.64948	0.011012
AT3G26618	eukaryotic release factor 1-3	protein_coding	eukaryotic release factor 1-3	NA	-0.83912	4.84779	0.017247
AT5G04940	SU(VAR)3-9 homolog 1	protein_coding	SU(VAR)3-9 homolog 1	NA	-0.83981	4.18394	0.021586
AT5G06700	trichome birefringence-like protein (DUF828)	protein_coding	NA	TBR,TBR,TRICHOME BIREFRINGENCE	-0.83992	6.39172	0.018483
AT5G51545	low psii accumulation2	protein_coding	low psii accumulation2	NA	-0.84011	5.1457	0.047913
AT5G03530	RAB GTPase homolog C2A	protein_coding	RAB GTPase homolog C2A	ATRAB,ATRAB ALPHA,ATRAB18B,ATRABC2A,ARABIDOPSIS THALIANA RAB GTPASE HOMOLOG C2A	-0.84103	2.49877	0.049554
AT1G12930	ARM repeat superfamily protein	protein_coding	NA	NA	-0.84271	4.24369	0.042653
AT5G14370	CCT motif family protein	protein_coding	NA	NA	-0.84272	4.98283	0.031094
AT4G21890	zinc finger MYND domain protein	protein_coding	NA	NA	-0.8431	3.02442	0.024332
AT5G15050	Core-2/I-branching beta-1%2C6-N-acetylglucosaminyltransferase family protein	protein_coding	NA	GlcAT14B,GlcA transferase 14B	-0.8435	4.86861	0.040082
AT2G01130	DEA(D/H)-box RNA helicase family protein	protein_coding	NA	NA	-0.84432	4.14174	0.037995
AT1G12300	Tetratricopeptide repeat (TPR)-like superfamily protein	protein_coding	NA	NA	-0.84527	1.62445	0.04984
AT1G34760	general regulatory factor 11	protein_coding	general regulatory factor 11	GF14 OMICRON,RHS5,ROOT HAIR SPECIFIC 5	-0.84565	2.57024	0.03437
AT3G51080	GATA transcription factor 6	protein_coding	GATA transcription factor 6	NA	-0.84718	2.36978	0.040743
AT1G21840	urease accessory protein F	protein_coding	urease accessory protein F	NA	-0.84843	1.63761	0.042519
AT5G47455	hypothetical protein	protein_coding	NA	NA	-0.84874	2.99448	0.038423
AT1G27200	glycosyltransferase family protein (DUF23)	protein_coding	NA	NA	-0.84929	3.63956	0.040402
AT3G62650	hypothetical protein	protein_coding	NA	NA	-0.85038	4.4612	0.017029
AT5G55510	Mitochondrial import inner membrane translocase subunit Tim17/Tim22/Tim23 family protein	protein_coding	NA	HP22,hypothetical protein 22	-0.85137	3.65079	0.020554
AT3G21270	DOF zinc finger protein 2	protein_coding	DOF zinc finger protein 2	ADOF2,DOF zinc finger protein 2	-0.85161	3.23922	0.044738
AT1G09200	Histone superfamily protein	protein_coding	NA	H3.1,histone 3.1	-0.85196	4.57726	0.020552
AT4G02680	ETO1-like 1	protein_coding	ETO1-like 1	NA	-0.85563	5.35367	0.036216
AT5G09760	Plant invertase/pectin methylesterase inhibitor superfamily	protein_coding	NA	NA	-0.85638	4.07563	0.030403
AT5G42420	Nucleotide-sugar transporter family protein	protein_coding	NA	URGT3,UDP-Rha/UDP-Gal transporter 3	-0.85909	4.93579	0.011357
AT2G21070	methyltransferase	protein_coding	FIONA1	NA	-0.85937	2.67325	0.03647
AT1G77620	P-loop containing nucleoside triphosphate hydrolases superfamily protein	protein_coding	NA	NA	-0.8611	3.15462	0.023732
AT5G41410	POX (plant homeobox) family protein	protein_coding	BELL 1	NA	-0.86144	5.66511	0.043203
AT5G18460	carboxyl-terminal peptidase (DUF239)	protein_coding	NA	NA	-0.8615	4.25223	0.035353
AT1G02050	Chalcone and stilbene synthase family protein	protein_coding	LESS ADHESIVE POLLEN 6	PSKA,polyketide synthase A	-0.86234	1.95944	0.047178
AT5G45290	RING/U-box superfamily protein	protein_coding	NA	NA	-0.86301	4.2078	0.017029
AT2G23610	methyl esterase 3	protein_coding	methyl esterase 3	ATMES3,ARABIDOPSIS THALIANA METHYL ESTERASE 3	-0.86634	5.58175	0.036428
AT4G30000	Dihydropterin pyrophosphokinase / Dihydropteroate synthase	protein_coding	NA	NA	-0.86686	2.92108	0.023447
AT4G18590	Nucleic acid-binding%2C OB-fold-like protein	protein_coding	NA	RPA3B,Replication Protein A 3B	-0.86699	3.62785	0.019074
AT2G03350	DUF538 family protein (Protein of unknown function%2C DUF538)	protein_coding	NA	NA	-0.86703	4.83731	0.033022
AT5G48910	Pentatricopeptide repeat (PPR) superfamily protein	protein_coding	LOW PSII ACCUMULATION 66	NA	-0.86782	4.47237	0.045955
AT1G12620	Pentatricopeptide repeat (PPR) superfamily protein	protein_coding	NA	NA	-0.86901	2.56755	0.033252
AT1G68060	microtubule-associated proteins 70-1	protein_coding	microtubule-associated proteins 70-1	ATMAP70-1,microtubule-associated proteins 70-1	-0.87042	5.38995	0.011333
AT5G26910	GPI-anchored adhesin-like protein	protein_coding	TON1 Recruiting Motif 8	NA	-0.87086	4.26094	0.02282
AT5G28919	hypothetical protein	protein_coding	NA	NA	-0.87148	4.56326	0.020731
AT5G58550	ETO1-like 2	protein_coding	ETO1-like 2	NA	-0.87312	3.60272	0.048535
AT4G16650	O-fucosyltransferase family protein	protein_coding	NA	NA	-0.87435	4.67768	0.01623
AT1G17455	ELF4-like 4	protein_coding	ELF4-like 4	NA	-0.87513	2.94239	0.035451
AT5G66920	SKU5 similar 17	protein_coding	SKU5similar 17	NA	-0.87581	3.25177	0.046624
AT4G20130	plastid transcriptionally active 14	protein_coding	plastid transcriptionally active 14	TAC14	-0.87658	5.71952	0.04232
AT5G14210	Leucine-rich repeat protein kinase family protein	protein_coding	NA	NA	-0.87711	5.74129	0.030114
AT1G10030	ergosterol biosynthesis protein	protein_coding	homolog of yeast ergosterol28	NA	-0.8779	2.85827	0.042399
AT5G18550	Zinc finger C-x8-C-x5-C-x3-H type family protein	protein_coding	NA	NA	-0.87858	4.29924	0.021958
AT5G57440	Haloacid dehalogenase-like hydrolase (HAD) superfamily protein	protein_coding	NA	NA	-0.88191	4.28237	0.025553
AT5G07590	Transducin/WD40 repeat-like superfamily protein	protein_coding	NA	NA	-0.88328	3.00469	0.029084
AT2G33500	B-box type zinc finger protein with CCT domain-containing protein	protein_coding	B-box domain protein 12	NA	-0.88649	3.40344	0.048495
AT1G65470	chromatin assembly factor-1 (FASCIATA1) (FAS1)	protein_coding	FASCIATA 1	FUGU2,FUGU 2,NFB2,NUCLEOSOME/CHROMATIN ASSEMBLY FACTOR GROUP B	-0.88672	2.70686	0.048791
AT1G24290	AAA-type ATPase family protein	protein_coding	NA	NA	-0.88757	1.98266	0.046878
AT1G07070	Ribosomal protein L35Ae family protein	protein_coding	NA	NA	-0.88789	3.62334	0.037669
AT2G31270	CDT1-like protein A	protein_coding	homolog of yeast CDT1 A	ATCDT1A,ARABIDOPSIS HOMOLOG OF YEAST CDT1 A,CDT1,ARABIDOPSIS HOMOLOG OF YEAST CDT1	-0.88924	3.10116	0.026615
AT3G52420	outer envelope membrane protein 7	protein_coding	outer envelope membrane protein 7	ATOEP7,OUTER ENVELOPE MEMBRANE PROTEIN 7	-0.88997	2.54536	0.022824
AT1G12550	D-isomer specific 2-hydroxyacid dehydrogenase family protein	protein_coding	hydroxypyruvate reductase 3	NA	-0.89145	2.2655	0.04779
AT5G10370	helicase domain-containing protein / IBR domain-containing protein / zinc finger protein-like protein	protein_coding	NA	NA	-0.89255	3.5406	0.030114
AT1G16920	RAB GTPase homolog A1B	protein_coding	RAB GTPase homolog A1B	ATRABA1B,RAB GTPase homolog A1B,BEX5,BFA-visualized exocytic trafficking defective 5,RAB11	-0.89446	3.94997	0.016723
AT5G67560	ADP-ribosylation factor-like A1D	protein_coding	ADP-ribosylation factor-like A1D	ATARLA1D,ADP-ribosylation factor-like A1D	-0.89503	5.81878	0.014144
AT1G02690	importin alpha isoform 6	protein_coding	importin alpha isoform 6	NA	-0.89729	2.26238	0.043612
AT2G02500	Nucleotide-diphospho-sugar transferases superfamily protein	protein_coding	NA	NA	-0.89807	4.69276	0.049069
AT5G62000	auxin response factor 2	protein_coding	auxin response factor 2	ARF1-BP,ARF1-BINDING PROTEIN,AtARF2,HSS,HLS1 SUPPRESSOR,ORE14,ORESARA 14	-0.89867	7.81533	0.013513
AT2G26250	3-ketoacyl-CoA synthase 10	protein_coding	3-ketoacyl-CoA synthase 10	FDH,FIDDLEHEAD	-0.89907	6.90637	0.028772
AT2G38050	3-oxo-5-alpha-steroid 4-dehydrogenase family protein	protein_coding	DE-ETIOLATED 2	ATDET2,DWF6,DWARF 6	-0.89992	3.24405	0.041958
AT4G29260	HAD superfamily%2C subfamily IIIB acid phosphatase	protein_coding	NA	NA	-0.90115	4.28287	0.015499
AT5G46510	Disease resistance protein (TIR-NBS-LRR class) family	protein_coding	NA	VICTL,VARIATION IN COMPOUND TRIGGERED ROOT growth response-like	-0.90245	3.80682	0.025033
AT4G25320	AT hook motif DNA-binding family protein	protein_coding	NA	AHL3,AT-HOOK MOTIF NUCLEAR LOCALIZED PROTEIN 3	-0.90265	3.30996	0.046144
AT3G13225	WW domain-containing protein	protein_coding	NA	NA	-0.90288	4.74753	0.009761
AT3G57430	Tetratricopeptide repeat (TPR)-like superfamily protein	protein_coding	ORGANELLE TRANSCRIPT PROCESSING 84	NA	-0.90458	3.62068	0.040749
AT4G28050	tetraspanin7	protein_coding	tetraspanin7	NA	-0.90632	3.95563	0.012777
AT4G02060	Minichromosome maintenance (MCM2/3/5) family protein	protein_coding	PROLIFERA	MCM7	-0.90643	3.64089	0.017793
AT2G37585	Core-2/I-branching beta-1%2C6-N-acetylglucosaminyltransferase family protein	protein_coding	NA	GlcAT14C,GlcA transferase 14C	-0.90668	3.78932	0.026358
AT2G23520	Pyridoxal phosphate (PLP)-dependent transferases superfamily protein	protein_coding	NA	NA	-0.90813	4.01477	0.019447
AT3G15480	fiber (DUF1218)	protein_coding	NA	NA	-0.90822	5.22616	0.014819
AT5G41870	Pectin lyase-like superfamily protein	protein_coding	NA	NA	-0.90874	3.89957	0.045947
AT2G45970	cytochrome P450%2C family 86%2C subfamily A%2C polypeptide 8	protein_coding	cytochrome P450%2C family 86%2C subfamily A%2C polypeptide 8	LCR,LACERATA	-0.90949	4.02237	0.019788
AT3G17160	hypothetical protein	protein_coding	NA	NA	-0.90996	3.16168	0.033864
AT4G31140	O-Glycosyl hydrolases family 17 protein	protein_coding	NA	NA	-0.91075	3.69463	0.047185
AT1G78240	S-adenosyl-L-methionine-dependent methyltransferases superfamily protein	protein_coding	TUMOROUS SHOOT DEVELOPMENT 2	OSU1,QUA2,QUASIMODO2	-0.91516	5.72974	0.038351
AT4G05040	ankyrin repeat family protein	protein_coding	NA	NA	-0.91699	3.57088	0.044014
AT2G35620	Leucine-rich repeat protein kinase family protein	protein_coding	FEI 2	NA	-0.91701	5.39072	0.022265
AT1G01500	Erythronate-4-phosphate dehydrogenase family protein	protein_coding	NA	NA	-0.91878	4.54655	0.023548
AT1G13860	QUASIMODO2 LIKE 1	protein_coding	QUASIMODO2 LIKE 1	NA	-0.91885	4.59437	0.014025
AT1G51630	O-fucosyltransferase family protein	protein_coding	Mannan Synthesis Related 2	AtMSR2	-0.91903	5.35085	0.044413
AT1G55160	WAS/WASL-interacting family protein	protein_coding	NA	NA	-0.92062	4.23261	0.043203
AT3G60740	ARM repeat superfamily protein	protein_coding	TITAN 1	CHO,CHAMPIGNON,EMB133,EMBRYO DEFECTIVE 133,TFC D,TUBULIN FOLDING COFACTOR D	-0.92125	4.25032	0.019258
AT3G27906	hypothetical protein	protein_coding	NA	NA	-0.92352	2.90564	0.047671
AT5G45760	Transducin/WD40 repeat-like superfamily protein	protein_coding	NA	NA	-0.92547	2.71536	0.043869
AT1G01860	Ribosomal RNA adenine dimethylase family protein	protein_coding	PALEFACE 1	NA	-0.92846	3.60428	0.029209
AT4G08035	other_RNA	other_rna	NA	NA	-0.93043	4.07932	0.024247
AT3G57170	N-acetylglucosaminyl transferase component family protein / Gpi1 family protein	protein_coding	NA	NA	-0.93209	4.37452	0.021081
AT1G29840	alpha/beta-Hydrolases superfamily protein	protein_coding	NA	NA	-0.93235	2.7712	0.042415
AT5G05450	P-loop containing nucleoside triphosphate hydrolases superfamily protein	protein_coding	NA	NA	-0.93334	4.06827	0.025134
AT1G06710	Tetratricopeptide repeat (TPR)-like superfamily protein	protein_coding	NA	MTSF1,mitochondrial stability factor 1	-0.93523	2.53502	0.047084
AT4G04890	protodermal factor 2	protein_coding	protodermal factor 2	NA	-0.93529	6.27243	0.014144
AT5G60030	hypothetical protein	protein_coding	NA	NA	-0.9357	3.55751	0.048624
AT3G01310	Phosphoglycerate mutase-like family protein	protein_coding	NA	AtVIP1,Arabidopsis homolog of yeast Vip1 1	-0.93571	7.32316	0.035644
AT1G59840	cofactor assembly of complex C	protein_coding	cofactor assembly of complex C	NA	-0.93829	5.13004	0.040402
AT4G37670	N-acetyl-l-glutamate synthase 2	protein_coding	N-acetyl-l-glutamate synthase 2	NA	-0.9392	3.19807	0.026957
AT4G03935	NA	other_rna	NA	NA	-0.93997	2.29055	0.049765
AT5G07840	Ankyrin repeat family protein	protein_coding	phytochrome interacting ankyrin-repeat protein 1	NA	-0.94143	3.73838	0.019567
AT3G48810	Pentatricopeptide repeat (PPR) superfamily protein	protein_coding	NA	NA	-0.94303	2.08291	0.04439
AT1G16750	GPI-anchored adhesin-like protein%2C putative (Protein of unknown function%2C DUF547)	protein_coding	NA	NA	-0.94427	3.25939	0.039568
AT1G02420	Pentatricopeptide repeat (PPR) superfamily protein	protein_coding	NA	NA	-0.94464	2.08883	0.042534
AT1G21590	kinase with adenine nucleotide alpha hydrolases-like domain-containing protein	protein_coding	NA	NA	-0.94539	6.67052	0.048212
AT5G51080	RNase H family protein	protein_coding	NA	NA	-0.94678	1.63529	0.047308
AT5G14600	S-adenosyl-L-methionine-dependent methyltransferases superfamily protein	protein_coding	NA	NA	-0.94679	2.81078	0.031137
AT1G30570	hercules receptor kinase 2	protein_coding	hercules receptor kinase 2	NA	-0.94737	4.07248	0.025134
AT2G41980	Protein with RING/U-box and TRAF-like domain	protein_coding	NA	NA	-0.94775	4.23146	0.030344
AT4G28320	Glycosyl hydrolase superfamily protein	protein_coding	endo-beta-mannase 5	AtMAN5	-0.95035	2.72901	0.043943
AT2G30350	Excinuclease ABC%2C C subunit%2C N-terminal	protein_coding	NA	NA	-0.95157	3.09353	0.048495
AT2G39900	GATA type zinc finger transcription factor family protein	protein_coding	WLIM2a	NA	-0.95392	4.87063	0.046843
AT5G60920	COBRA-like extracellular glycosyl-phosphatidyl inositol-anchored protein family	protein_coding	COBRA	NA	-0.95469	7.6935	0.039768
AT1G13170	OSBP(oxysterol binding protein)-related protein 1D	protein_coding	OSBP(oxysterol binding protein)-related protein 1D	NA	-0.95497	4.69719	0.015826
AT5G01090	Concanavalin A-like lectin family protein	protein_coding	NA	NA	-0.95574	4.67052	0.046624
AT4G02100	Heat shock protein DnaJ with tetratricopeptide repeat-containing protein	protein_coding	NA	NA	-0.95592	2.03569	0.044195
AT5G11310	Pentatricopeptide repeat (PPR) superfamily protein	protein_coding	NA	SOAR1,suppressor of the ABAR overexpressor 1	-0.95833	2.11009	0.048722
AT5G54200	Transducin/WD40 repeat-like superfamily protein	protein_coding	NA	NA	-0.95863	3.15854	0.025134
AT2G29550	tubulin beta-7 chain	protein_coding	tubulin beta-7 chain	NA	-0.95969	5.98852	0.03215
AT1G21880	lysm domain GPI-anchored protein 1 precursor	protein_coding	lysm domain GPI-anchored protein 1 precursor	LYP2,LysM-containing receptor protein 2	-0.96251	4.3319	0.030474
AT2G18850	SET domain-containing protein	protein_coding	NA	NA	-0.96325	2.98953	0.039023
AT1G53800	muscle M-line assembly protein	protein_coding	NA	NA	-0.96594	6.09569	0.018032
AT4G12640	RNA recognition motif (RRM)-containing protein	protein_coding	NA	NA	-0.96761	4.11372	0.01433
AT1G53040	tRNA (met) cytidine acetyltransferase%2C putative (DUF616)	protein_coding	NA	NA	-0.96957	4.77508	0.037439
AT5G55540	tornado 1	protein_coding	TORNADO 1	LOP1,LOPPED 1	-0.97136	4.51525	0.009761
AT4G07825	transmembrane protein	protein_coding	NA	NA	-0.97308	4.28867	0.021081
AT1G26570	UDP-glucose dehydrogenase 1	protein_coding	UDP-glucose dehydrogenase 1	ATUGD1,UDP-GLUCOSE DEHYDROGENASE 1	-0.97327	2.70453	0.032378
AT4G14230	CBS domain protein with a domain protein (DUF21)	protein_coding	NA	NA	-0.97399	6.64568	0.011887
AT1G30210	TEOSINTE BRANCHED 1%2C cycloidea%2C and PCF family 24	protein_coding	TEOSINTE BRANCHED 1%2C cycloidea%2C and PCF family 24	ATTCP24	-0.97422	5.54476	0.015561
AT5G18770	F-box/FBD-like domains containing protein	protein_coding	NA	NA	-0.97458	2.4281	0.023834
AT2G29970	Double Clp-N motif-containing P-loop nucleoside triphosphate hydrolases superfamily protein	protein_coding	NA	SMXL7,SMAX1-like 7	-0.97595	6.4903	0.036803
AT4G36680	Tetratricopeptide repeat (TPR)-like superfamily protein	protein_coding	NA	NA	-0.97854	3.45998	0.044403
AT3G50780	BTB/POZ domain protein	protein_coding	NA	NA	-0.97956	3.63946	0.020986
AT5G66950	Pyridoxal phosphate (PLP)-dependent transferases superfamily protein	protein_coding	NA	NA	-0.98102	4.58101	0.03719
AT3G28180	Cellulose-synthase-like C4	protein_coding	Cellulose-synthase-like C4	ATCSLC04,Cellulose-synthase-like C4,ATCSLC4,CSLC4,CELLULOSE-SYNTHASE LIKE C4	-0.98142	6.26806	0.033684
AT2G31280	transcription factor bHLH155-like protein	protein_coding	conserved peptide upstream open reading frame 7	LHL2,LONESOME HIGHWAY LIKE 2,LL2	-0.98239	4.40029	0.019049
AT1G15730	Cobalamin biosynthesis CobW-like protein	protein_coding	NA	NA	-0.9829	5.7533	0.018483
AT1G51805	Leucine-rich repeat protein kinase family protein	protein_coding	NA	NA	-0.98324	7.26925	0.019681
AT5G16720	caldesmon-like protein (Protein of unknown function%2C DUF593)	protein_coding	NA	MyoB3,myosin binding protein 3	-0.98437	2.36846	0.039568
AT1G05320	myosin heavy chain%2C embryonic smooth protein	protein_coding	NA	NA	-0.98453	4.24631	0.010557
AT2G42300	basic helix-loop-helix (bHLH) DNA-binding superfamily protein	protein_coding	NA	NA	-0.9871	4.09272	0.047542
AT5G20885	RING/U-box superfamily protein	protein_coding	NA	NA	-0.98756	2.80362	0.048434
AT4G09040	RNA-binding (RRM/RBD/RNP motifs) family protein	protein_coding	NA	NA	-0.98766	6.09198	0.022659
AT5G06430	Thioredoxin superfamily protein	protein_coding	NA	NA	-0.98926	2.36499	0.049096
AT5G27930	Protein phosphatase 2C family protein	protein_coding	NA	NA	-0.99235	5.24455	0.02787
AT5G09670	loricrin-like protein	protein_coding	NA	NA	-0.99319	5.20599	0.038759
AT5G40150	Peroxidase superfamily protein	protein_coding	NA	NA	-0.99346	3.10864	0.048434
AT2G38630	Transducin/WD40 repeat-like superfamily protein	protein_coding	NA	NA	-0.99357	3.79092	0.021521
AT1G05410	CDPK adapter%2C putative (DUF1423)	protein_coding	NA	NA	-0.99458	3.67046	0.02067
AT3G08680	Leucine-rich repeat protein kinase family protein	protein_coding	NA	NA	-0.99506	5.16423	0.02593
AT1G64355	1-acyl-sn-glycerol-3-phosphate acyltransferase	protein_coding	NA	NA	-0.99522	5.15664	0.03647
AT4G01020	helicase domain-containing protein / IBR domain-containing protein / zinc finger protein-like protein	protein_coding	NA	NA	-0.99841	3.50942	0.037691
AT3G23820	UDP-D-glucuronate 4-epimerase 6	protein_coding	UDP-D-glucuronate 4-epimerase 6	NA	-1.00179	8.57236	0.040402
AT1G24120	ARG1-like 1	protein_coding	ARG1-like 1	NA	-1.00278	4.85306	0.017114
AT3G19553	Amino acid permease family protein	protein_coding	POLYAMINE UPTAKE TRANSPORTER 5	NA	-1.00394	4.96178	0.031137
AT5G51560	Leucine-rich repeat protein kinase family protein	protein_coding	NA	NA	-1.00485	4.06739	0.009761
AT3G23610	dual specificity protein phosphatase 1	protein_coding	dual specificity protein phosphatase 1	NA	-1.00512	1.81565	0.037148
AT3G07080	EamA-like transporter family	protein_coding	NA	NA	-1.00544	3.57186	0.020728
AT4G30520	Leucine-rich repeat protein kinase family protein	protein_coding	SENESCENCE-ASSOCIATED RECEPTOR-LIKE KINASE	NA	-1.00633	3.4051	0.047084
AT4G08940	Ubiquitin carboxyl-terminal hydrolase family protein	protein_coding	NA	NA	-1.00645	2.16803	0.033022
AT2G45340	Leucine-rich repeat protein kinase family protein	protein_coding	NA	NA	-1.00755	5.1338	0.04232
AT2G04865	Aminotransferase-like%2C plant mobile domain family protein	protein_coding	NA	MAIL2,MAIN-LIKE 2	-1.00795	4.17066	0.014819
AT4G12420	Cupredoxin superfamily protein	protein_coding	NA	NA	-1.00808	6.4555	0.038851
AT5G48150	GRAS family transcription factor	protein_coding	phytochrome a signal transduction 1	NA	-1.00847	5.293	0.03437
AT3G24480	Leucine-rich repeat (LRR) family protein	protein_coding	NA	NA	-1.00856	5.5561	0.031783
AT4G40045	transmembrane protein	protein_coding	NA	NA	-1.00925	3.85688	0.031557
AT1G46554	other_RNA	other_rna	NA	NA	-1.00929	2.51274	0.035123
AT3G55340	phragmoplastin interacting protein 1	protein_coding	phragmoplastin interacting protein 1	NA	-1.01016	3.71627	0.039259
AT3G06590	basic helix-loop-helix (bHLH) DNA-binding superfamily protein	protein_coding	NA	AIF2,ATBS1 Interacting Factor 2,RITF1,RSA1 interacting transcription factor 1	-1.01069	4.10631	0.014841
AT1G06960	RNA-binding (RRM/RBD/RNP motifs) family protein	protein_coding	NA	NA	-1.01162	3.33662	0.024008
AT2G18910	hydroxyproline-rich glycoprotein family protein	protein_coding	NA	NA	-1.01186	4.09363	0.042699
AT4G29720	polyamine oxidase 5	protein_coding	polyamine oxidase 5	AtPAO5,polyamine oxidase 5	-1.01347	4.92187	0.049253
AT2G21080	Ras guanine nucleotide exchange factor K	protein_coding	NA	NA	-1.01375	2.902	0.044434
AT1G54310	S-adenosyl-L-methionine-dependent methyltransferases superfamily protein	protein_coding	NA	NA	-1.01396	3.86468	0.036989
AT5G15280	Pentatricopeptide repeat (PPR) superfamily protein	protein_coding	NA	NA	-1.01754	3.37786	0.01623
AT1G23970	hypothetical protein (DUF626)	protein_coding	NA	NA	-1.01911	2.82011	0.030316
AT1G80690	PPPDE putative thiol peptidase family protein	protein_coding	NA	NA	-1.01945	2.2271	0.032058
AT1G20720	RAD3-like DNA-binding helicase protein	protein_coding	NA	NA	-1.01946	1.60988	0.03197
AT3G24080	KRR1 family protein	protein_coding	NA	NA	-1.02052	5.32144	0.013942
AT3G22104	Phototropic-responsive NPH3 family protein	protein_coding	NA	NA	-1.02168	4.47965	0.041919
AT5G40380	cysteine-rich RLK (RECEPTOR-like protein kinase) 42	protein_coding	cysteine-rich RLK (RECEPTOR-like protein kinase) 42	NA	-1.02294	3.85504	0.044736
AT5G44040	eisosome SEG2-like protein	protein_coding	NA	NA	-1.02332	2.44195	0.036539
AT1G75710	C2H2-like zinc finger protein	protein_coding	NA	NA	-1.02374	3.55038	0.037201
AT2G04270	RNAse E/G-like protein	protein_coding	RNAse E/G-like	RNE,RNase E	-1.02395	5.12496	0.028564
AT1G02720	galacturonosyltransferase 5	protein_coding	galacturonosyltransferase 5	AtGATL5	-1.02447	3.37106	0.021092
AT5G05620	gamma-tubulin complex protein 2	protein_coding	gamma-tubulincomplex protein 2	ATGCP2,ARABIDOPSIS THALIANA GAMMA-TUBULINCOMPLEX PROTEIN 2,TUBG2,GAMMA-TUBULIN 2	-1.02863	3.71191	0.038941
AT3G13150	Tetratricopeptide repeat (TPR)-like superfamily protein	protein_coding	NA	NA	-1.02888	2.47109	0.045876
AT3G52290	IQ-domain 3	protein_coding	IQ-domain 3	NA	-1.03007	3.8212	0.010508
AT4G21900	proteinaceous RNase P 3	protein_coding	proteinaceous RNase P 3	NA	-1.03134	3.06299	0.014021
AT5G45930	magnesium chelatase i2	protein_coding	magnesium chelatase i2	CHL I2,CHLI-2	-1.03191	6.47393	0.031757
AT3G08920	Rhodanese/Cell cycle control phosphatase superfamily protein	protein_coding	NA	NA	-1.03324	5.38887	0.04961
AT2G26550	heme oxygenase 2	protein_coding	heme oxygenase 2	NA	-1.03582	4.30514	0.018309
AT3G53240	receptor like protein 45	protein_coding	receptor like protein 45	AtRLP45,receptor like protein 45	-1.03628	3.73485	0.013586
AT5G07630	lipid transporter	protein_coding	NA	NA	-1.03744	3.97097	0.025815
AT3G51950	Zinc finger (CCCH-type) family protein / RNA recognition motif (RRM)-containing protein	protein_coding	NA	NA	-1.03761	7.0692	0.040926
AT3G22310	putative mitochondrial RNA helicase 1	protein_coding	putative mitochondrial RNA helicase 1	ATRH9,RNA HELICASE 9	-1.03872	4.41834	0.047659
AT1G14460	AAA-type ATPase family protein	protein_coding	NA	NA	-1.04131	4.0595	0.020986
AT4G05520	EPS15 homology domain 2	protein_coding	EPS15 homology domain 2	ATEHD2,EPS15 homology domain 2	-1.04179	2.29787	0.034869
AT1G64890	Major facilitator superfamily protein	protein_coding	NA	NA	-1.04326	4.25694	0.011357
AT1G16800	P-loop containing nucleoside triphosphate hydrolases superfamily protein	protein_coding	NA	NA	-1.04486	2.95233	0.021081
AT1G15910	XH/XS domain-containing protein	protein_coding	factor of DNA methylation 1	IDNL1,INVOLVED IN DE NOVO 2 (IDN2) - LIKE 1,IDP1,IDN2 PARALOG 1	-1.04616	3.51728	0.045472
AT1G12460	Leucine-rich repeat protein kinase family protein	protein_coding	NA	NA	-1.04691	3.98827	0.03641
AT3G16950	lipoamide dehydrogenase 1	protein_coding	lipoamide dehydrogenase 1	ptlpd1	-1.04772	4.74308	0.03342
AT1G60790	trichome birefringence-like protein (DUF828)	protein_coding	TRICHOME BIREFRINGENCE-LIKE 2	NA	-1.04795	4.48527	0.027786
AT5G36940	cationic amino acid transporter 3	protein_coding	cationic amino acid transporter 3	AtCAT3	-1.04813	4.76045	0.019567
AT1G05850	Chitinase family protein	protein_coding	POM-POM1	ATCTL1,CTL1,CHITINASE-LIKE PROTEIN 1,ELP1,ECTOPIC DEPOSITION OF LIGNIN IN PITH 1,ELP,ECTOPIC DEPOSITION OF LIGNIN IN PITH,ERH2,ECTOPIC ROOT HAIR 2,HOT2,SENSITIVE TO HOT TEMPERATURES 2	-1.05011	9.13791	0.018336
AT3G01810	EEIG1/EHBP1 protein amino-terminal domain protein	protein_coding	NA	NA	-1.0503	6.06081	0.044736
AT2G31900	myosin-like protein XIF	protein_coding	myosin-like protein XIF	ATMYO5,MYOSIN 5,ATXIF,MYOSIN XI F	-1.05111	2.39058	0.036056
AT3G10070	TBP-associated factor 12	protein_coding	TBP-associated factor 12	TAFII58,TATA-ASSOCIATED FACTOR II 58	-1.05154	3.19922	0.012777
AT2G45860	hypothetical protein	protein_coding	NA	NA	-1.05218	3.07395	0.021978
AT2G22795	hypothetical protein	protein_coding	NA	NA	-1.0526	6.10057	0.032475
AT4G01220	Nucleotide-diphospho-sugar transferase family protein	protein_coding	male gametophyte defective 4	NA	-1.05318	3.63216	0.040586
AT2G40920	F-box and associated interaction domains-containing protein	protein_coding	NA	NA	-1.05359	3.95691	0.011357
AT3G20120	cytochrome P450%2C family 705%2C subfamily A%2C polypeptide 21	protein_coding	cytochrome P450%2C family 705%2C subfamily A%2C polypeptide 21	NA	-1.05443	3.68061	0.030075
AT1G31150	K-box region protein (DUF1985)	protein_coding	NA	NA	-1.05639	3.33639	0.037689
AT1G22590	AGAMOUS-like 87	protein_coding	AGAMOUS-like 87	NA	-1.05676	3.87945	0.032053
AT1G03930	dual specificity kinase 1	protein_coding	dual specificity kinase 1	CKL9ALPHA,CASEIN KINASE I-LIKE 9 ALPHA,CKL9BETA,CASEIN KINASE I-LIKE 9 BETA	-1.05926	5.61982	0.011357
AT2G23700	Itga6 (Protein of unknown function%2C DUF547)	protein_coding	NA	NA	-1.06067	1.90079	0.039752
AT4G26370	antitermination NusB domain-containing protein	protein_coding	NA	NA	-1.06073	5.73316	0.037552
AT5G02820	Spo11/DNA topoisomerase VI%2C subunit A protein	protein_coding	ROOT HAIRLESS 2	BIN5,BRASSINOSTEROID INSENSITIVE 5	-1.0611	2.92524	0.023548
AT1G14380	IQ-domain 28	protein_coding	IQ-domain 28	NA	-1.06276	4.31347	0.022016
AT5G06390	FASCICLIN-like arabinogalactan protein 17 precursor	protein_coding	FASCICLIN-like arabinogalactan protein 17 precursor	NA	-1.06908	5.43355	0.01335
AT3G56130	biotin/lipoyl attachment domain-containing protein	protein_coding	NA	NA	-1.06922	4.87164	0.0357
AT4G23490	fringe-like protein (DUF604)	protein_coding	NA	NA	-1.07082	3.24362	0.027696
AT1G77850	auxin response factor 17	protein_coding	auxin response factor 17	NA	-1.0719	3.63549	0.036642
AT1G12330	cyclin-dependent kinase-like protein	protein_coding	NA	NA	-1.07382	4.05126	0.023519
AT5G44340	tubulin beta chain 4	protein_coding	tubulin beta chain 4	NA	-1.07386	8.49531	0.024008
AT3G44740	Class II aaRS and biotin synthetases superfamily protein	protein_coding	NA	NA	-1.07445	2.52075	0.01697
AT3G12690	AGC kinase 1.5	protein_coding	AGC kinase 1.5	NA	-1.07651	2.58306	0.032077
AT3G55350	PIF / Ping-Pong family of plant transposase	protein_coding	NA	NA	-1.0768	3.05553	0.023957
AT5G05990	Mitochondrial glycoprotein family protein	protein_coding	NA	NA	-1.07909	2.91328	0.041925
AT3G16810	pumilio 24	protein_coding	pumilio 24	APUM24,pumilio 24	-1.08128	4.4768	0.046111
AT4G01440	nodulin MtN21 /EamA-like transporter family protein	protein_coding	Usually multiple acids move in and out Transporters 31	NA	-1.08164	2.32659	0.047084
AT3G57320	threonine-tRNA ligase 2	protein_coding	NA	NA	-1.08207	3.19609	0.041188
AT4G12620	origin of replication complex 1B	protein_coding	origin of replication complex 1B	ATORC1B,UNE13,UNFERTILIZED EMBRYO SAC 13	-1.08284	1.76392	0.049554
AT3G59320	solute carrier family 35 protein (DUF914)	protein_coding	NA	NA	-1.083	2.37059	0.039768
AT4G00730	Homeobox-leucine zipper family protein / lipid-binding START domain-containing protein	protein_coding	ANTHOCYANINLESS 2	AHDP,ARABIDOPSIS THALIANA HOMEODOMAIN PROTEIN	-1.08409	5.79085	0.029013
AT1G27950	glycosylphosphatidylinositol-anchored lipid protein transfer 1	protein_coding	glycosylphosphatidylinositol-anchored lipid protein transfer 1	NA	-1.08424	6.25446	0.036989
AT1G12380	hypothetical protein	protein_coding	NA	NA	-1.08704	3.17375	0.026615
AT1G67690	Zincin-like metalloproteases family protein	protein_coding	NA	NA	-1.08739	3.11587	0.026757
AT3G12915	Ribosomal protein S5/Elongation factor G/III/V family protein	protein_coding	NA	NA	-1.08825	3.19925	0.047316
AT2G41560	autoinhibited Ca(2+)-ATPase%2C isoform 4	protein_coding	autoinhibited Ca(2+)-ATPase%2C isoform 4	NA	-1.0883	6.89029	0.015897
AT3G04980	DNAJ heat shock N-terminal domain-containing protein	protein_coding	NA	NA	-1.08969	1.89311	0.036129
AT1G13870	KTI12-like%2C chromatin associated protein	protein_coding	DEFORMED ROOTS AND LEAVES 1	AtKTI12	-1.08983	3.64954	0.011416
AT5G10700	Peptidyl-tRNA hydrolase II (PTH2) family protein	protein_coding	NA	NA	-1.09048	2.48019	0.027297
AT5G25890	indole-3-acetic acid inducible 28	protein_coding	indole-3-acetic acid inducible 28	IAR2,IAA-ALANINE RESISTANT 2	-1.09088	2.49204	0.043203
AT4G37450	arabinogalactan protein 18	protein_coding	arabinogalactan protein18	ATAGP18	-1.09148	3.58771	0.03719
AT3G06150	cytochrome P450 family protein	protein_coding	NA	NA	-1.09162	4.84491	0.01335
AT4G23840	Leucine-rich repeat (LRR) family protein	protein_coding	NA	NA	-1.09182	2.39495	0.023967
AT2G31070	TCP domain protein 10	protein_coding	TCP domain protein 10	NA	-1.0922	5.41427	0.047084
AT5G05830	RING/FYVE/PHD zinc finger superfamily protein	protein_coding	NA	NA	-1.09244	3.40288	0.035856
AT1G69530	expansin A1	protein_coding	expansin A1	AT-EXP1,ATEXP1,ATEXPA1,expansin A1,ATHEXP ALPHA 1.2,EXP1,EXPANSIN 1	-1.09247	6.54578	0.022824
AT1G58590	other_RNA	other_rna	NA	NA	-1.09292	2.34199	0.028564
AT5G64740	cellulose synthase 6	protein_coding	cellulose synthase 6	E112,IXR2,ISOXABEN RESISTANT 2,PRC1,PROCUSTE 1	-1.0944	8.2592	0.048281
AT3G56408	Natural antisense transcript overlaps with AT3G56410	antisense_long_noncoding_rna	NA	NA	-1.09511	3.12887	0.020447
AT1G18150	Protein kinase superfamily protein	protein_coding	NA	NA	-1.0952	5.98954	0.010588
AT4G25500	arginine/serine-rich splicing factor 35	protein_coding	arginine/serine-rich splicing factor 40	AT-SRP40,ATRSP35,ARABIDOPSIS THALIANA ARGININE/SERINE-RICH SPLICING FACTOR 35,ATRSP40,At-RS40,arginine/serine-rich splicing factor 40,RSP35,arginine/serine-rich splicing factor 35	-1.09542	5.58683	0.01666
AT4G32410	cellulose synthase 1	protein_coding	cellulose synthase 1	ANY1,anisotropy1,AtCESA1,CELLULOSE SYNTHASE 1,RSW1,RADIALLY SWOLLEN 1	-1.09628	8.75792	0.01646
AT2G02480	AAA-type ATPase family protein	protein_coding	STICHEL	NA	-1.09692	3.25497	0.018948
AT3G60840	microtubule-associated protein 65-4	protein_coding	microtubule-associated protein 65-4	NA	-1.09969	1.77792	0.048597
AT2G28930	protein kinase 1B	protein_coding	protein kinase 1B	APK1B,protein kinase 1B	-1.10147	3.52839	0.022765
AT5G55740	Tetratricopeptide repeat (TPR)-like superfamily protein	protein_coding	chlororespiratory reduction 21	NA	-1.10211	4.9066	0.021769
AT5G54880	DTW domain-containing protein	protein_coding	NA	NA	-1.10299	2.30301	0.021092
AT1G10180	LOW protein: exocyst complex component-like protein	protein_coding	NA	NA	-1.10371	4.10868	0.027396
AT3G45850	P-loop containing nucleoside triphosphate hydrolases superfamily protein	protein_coding	NA	NA	-1.1064	5.57118	0.038475
AT5G04060	S-adenosyl-L-methionine-dependent methyltransferases superfamily protein	protein_coding	NA	NA	-1.10672	4.37329	0.009799
AT1G75690	DnaJ/Hsp40 cysteine-rich domain superfamily protein	protein_coding	LOW QUANTUM YIELD OF PHOTOSYSTEM II 1	NA	-1.10784	7.48185	0.030948
AT5G46570	BR-signaling kinase 2	protein_coding	brassinosteroid-signaling kinase 2	NA	-1.10893	4.47837	0.014265
AT1G76020	Thioredoxin superfamily protein	protein_coding	NA	NA	-1.10903	4.49467	0.018146
AT1G76880	Duplicated homeodomain-like superfamily protein	protein_coding	NA	NA	-1.11132	5.03115	0.023868
AT5G55960	transmembrane protein C9orf5 protein	protein_coding	NA	NA	-1.11167	6.04753	0.031185
AT4G00110	UDP-D-glucuronate 4-epimerase 3	protein_coding	UDP-D-glucuronate 4-epimerase 3	NA	-1.11186	2.97649	0.026688
AT5G65700	Leucine-rich receptor-like protein kinase family protein	protein_coding	BARELY ANY MERISTEM 1	NA	-1.11249	6.47187	0.032605
AT3G52890	KCBP-interacting protein kinase	protein_coding	KCBP-interacting protein kinase	NA	-1.11285	5.06155	0.015956
AT3G29375	XH domain-containing protein	protein_coding	NA	NA	-1.11397	3.54708	0.037439
AT1G47900	filament-like protein (DUF869)	protein_coding	NA	NA	-1.11566	4.78378	0.019541
AT2G24220	purine permease 5	protein_coding	purine permease 5	ATPUP5,purine permease 5	-1.11854	2.87105	0.037652
AT4G31290	ChaC-like family protein	protein_coding	NA	AtGGCT2%3B2,GGCT2%3B2,gamma-glutamyl cyclotransferase 2%3B2	-1.11937	5.51584	0.025457
AT3G46290	hercules receptor kinase 1	protein_coding	hercules receptor kinase 1	NA	-1.11961	5.83742	0.020447
AT5G13610	sporulation RMD1-like protein%2C putative (DUF155)	protein_coding	NA	NA	-1.12008	3.85914	0.031217
AT3G22780	Tesmin/TSO1-like CXC domain-containing protein	protein_coding	CHINESE FOR 'UGLY'	ATTSO1	-1.12153	4.57608	0.023745
AT5G26850	Uncharacterized protein	protein_coding	NA	NA	-1.12419	4.00465	0.049709
AT2G30930	hypothetical protein	protein_coding	NA	NA	-1.12941	3.39358	0.047301
AT5G05170	Cellulose synthase family protein	protein_coding	CONSTITUTIVE EXPRESSION OF VSP 1	ATCESA3,ATH-B,CESA3,CELLULOSE SYNTHASE 3,ELI1,ECTOPIC LIGNIFICATION 1,IXR1,ISOXABEN RESISTANT1,MRE1,multiple response expansion 1	-1.12986	8.75061	0.024303
AT2G02780	Leucine-rich repeat protein kinase family protein	protein_coding	NA	NA	-1.13249	3.41455	0.012282
AT5G42825	hypothetical protein	protein_coding	NA	NA	-1.13278	4.32487	0.021081
AT1G69690	TCP family transcription factor	protein_coding	TEOSINTE BRANCHED1/CYCLOIDEA/PCF 15	AtTCP15	-1.13358	4.71731	0.025589
AT4G27430	COP1-interacting protein 7	protein_coding	COP1-interacting protein 7	NA	-1.1341	6.44101	0.04675
AT1G14440	homeobox protein 31	protein_coding	homeobox protein 31	AtHB31,homeobox protein 31,FTM2,FLORAL TRANSITION AT THE MERISTEM2,ZHD4,ZINC FINGER HOMEODOMAIN 4	-1.13479	2.42028	0.045542
AT3G26850	histone-lysine N-methyltransferase	protein_coding	NA	NA	-1.1353	3.08904	0.027466
AT3G60530	GATA transcription factor 4	protein_coding	GATA transcription factor 4	NA	-1.13549	4.37893	0.026553
AT5G01240	like AUXIN RESISTANT 1	protein_coding	like AUXIN RESISTANT 1	NA	-1.13752	4.97545	0.028404
AT4G32200	DNA-binding HORMA family protein	protein_coding	NA	NA	-1.13767	2.30781	0.032249
AT3G14310	pectin methylesterase 3	protein_coding	pectin methylesterase 3	ATPME3,pectin methylesterase 3,OZS2,OVERLY ZINC SENSITIVE 2	-1.13768	8.07231	0.02029
AT3G18910	EIN2 targeting protein2	protein_coding	EIN2 targeting protein2	NA	-1.13788	2.10579	0.039445
AT4G13840	HXXXD-type acyl-transferase family protein	protein_coding	NA	CER26,ECERIFERUM 26	-1.13875	6.87082	0.025457
AT3G08670	serine/arginine repetitive matrix-like protein	protein_coding	NA	NA	-1.13923	4.56974	0.012656
AT1G26650	Son of sevenless protein	protein_coding	NA	NA	-1.13941	4.44668	0.039888
AT1G79490	Pentatricopeptide repeat (PPR) superfamily protein	protein_coding	embryo defective 2217	NA	-1.1416	2.91485	0.03729
AT2G27970	CDK-subunit 2	protein_coding	CDK-subunit 2	NA	-1.14462	2.08365	0.025134
AT5G05090	Homeodomain-like superfamily protein	protein_coding	NA	NA	-1.14491	3.1545	0.025134
AT2G44150	histone-lysine N-methyltransferase ASHH3	protein_coding	histone-lysine N-methyltransferase ASHH3	SDG7,SET DOMAIN-CONTAINING PROTEIN 7	-1.14598	3.44849	0.018483
AT5G46740	ubiquitin-specific protease 21	protein_coding	ubiquitin-specific protease 21	NA	-1.14643	3.02024	0.021376
AT5G01780	2-oxoglutarate-dependent dioxygenase family protein	protein_coding	NA	NA	-1.14915	4.07451	0.019628
AT3G49990	Low temperature viability protein	protein_coding	NA	NA	-1.14991	5.25091	0.01682
AT2G42580	tetratricopetide-repeat thioredoxin-like 3	protein_coding	tetratricopetide-repeat thioredoxin-like 3	VIT,VHI-INTERACTING TPR CONTAINING PROTEIN	-1.15006	4.45522	0.011421
AT5G67280	receptor-like kinase	protein_coding	receptor-like kinase	NA	-1.15014	5.57899	0.043184
AT1G62680	Pentatricopeptide repeat (PPR) superfamily protein	protein_coding	NA	NA	-1.15115	1.82978	0.04439
AT5G62550	microtubule-associated futsch-like protein	protein_coding	NA	NA	-1.15118	2.06203	0.037799
AT4G40030	Histone superfamily protein	protein_coding	NA	H3.3,histone 3.3	-1.1534	7.3015	0.015826
AT2G01910	Microtubule associated protein (MAP65/ASE1) family protein	protein_coding	NA	NA	-1.1547	5.21924	0.025947
AT1G68560	alpha-xylosidase 1	protein_coding	alpha-xylosidase 1	ATXYL1,ALPHA-XYLOSIDASE 1,AXY3,altered xyloglucan 3,TRG1,thermoinhibition resistant germination 1	-1.15498	8.13698	0.036989
AT1G72190	D-isomer specific 2-hydroxyacid dehydrogenase family protein	protein_coding	NA	NA	-1.15584	2.89793	0.025457
AT5G18440	GATA zinc finger protein	protein_coding	nuclear FMRP-interacting protein	AtNUFIP	-1.15779	3.66208	0.020728
AT1G03530	nuclear assembly factor 1	protein_coding	nuclear assembly factor 1	ATNAF1	-1.16057	3.64493	0.019227
AT2G29125	ROTUNDIFOLIA like 2	protein_coding	ROTUNDIFOLIA like 2	DVL13,DEVIL 13	-1.16121	0.695101	0.0443
AT5G67070	ralf-like 34	protein_coding	ralf-like 34	NA	-1.16228	5.54078	0.024332
AT1G72130	Major facilitator superfamily protein	protein_coding	NA	NA	-1.16286	4.43847	0.04779
AT2G44210	carboxyl-terminal peptidase (DUF239)	protein_coding	NA	NA	-1.16342	7.11282	0.020144
AT5G05630	Amino acid permease family protein	protein_coding	resistant to methyl viologen 1	PUT3,POLYAMINE UPTAKE TRANSPORTER 3	-1.16385	1.61998	0.044778
AT4G29510	arginine methyltransferase 11	protein_coding	arginine methyltransferase 11	ATPRMT11,ARABIDOPSIS THALIANA ARGININE METHYLTRANSFERASE 11,ATPRMT1B,ARABIDOPSIS THALIANA PROTEIN ARGININEMETHYLTRANSFERASE 1B,PRMT1B,PROTEIN ARGININE METHYLTRANSFERASE 1B	-1.16456	5.09903	0.013444
AT2G36570	Leucine-rich repeat protein kinase family protein	protein_coding	NA	PXC1,PXY/TDR-correlated 1	-1.16649	3.68242	0.034713
AT3G54690	Sugar isomerase (SIS) family protein	protein_coding	NA	NA	-1.16769	4.86045	0.01682
AT5G52950	LIM domain protein	protein_coding	NA	NA	-1.16775	1.69754	0.049634
AT2G27060	Leucine-rich repeat protein kinase family protein	protein_coding	NA	NA	-1.16944	4.02706	0.045957
AT4G26660	kinesin-like protein	protein_coding	NA	NA	-1.17089	0.995863	0.047185
AT3G47675	ternary complex factor MIP1 leucine-zipper protein	protein_coding	NA	NA	-1.172	3.20661	0.039568
AT1G49720	abscisic acid responsive element-binding factor 1	protein_coding	abscisic acid responsive element-binding factor 1	AtABF1	-1.17249	4.69391	0.020908
AT1G69020	Prolyl oligopeptidase family protein	protein_coding	NA	NA	-1.17343	2.02859	0.038468
AT5G44565	transmembrane protein	protein_coding	NA	NA	-1.17366	1.62389	0.033684
AT4G20740	Pentatricopeptide repeat (PPR-like) superfamily protein	protein_coding	EMBRYO DEFECTIVE 3131	NA	-1.17422	2.60424	0.023519
AT3G48100	response regulator 5	protein_coding	response regulator 5	ARR5,response regulator 5,ATRR2,ARABIDOPSIS THALIANA RESPONSE REGULATOR 2,IBC6,INDUCED BY CYTOKININ 6	-1.1759	2.88995	0.03035
AT1G77060	Phosphoenolpyruvate carboxylase family protein	protein_coding	NA	NA	-1.17754	5.58877	0.008236
AT3G49730	Tetratricopeptide repeat (TPR)-like superfamily protein	protein_coding	NA	NA	-1.17844	2.60381	0.033532
AT4G27820	beta glucosidase 9	protein_coding	beta glucosidase 9	NA	-1.17952	5.80561	0.035746
AT1G20380	Prolyl oligopeptidase family protein	protein_coding	NA	NA	-1.18334	2.81569	0.017887
AT3G26922	F-box/RNI-like superfamily protein	protein_coding	NA	NA	-1.18406	1.08071	0.032494
AT1G19330	histone deacetylase complex subunit	protein_coding	NA	NA	-1.18679	2.95074	0.031371
AT4G00238	DNA-binding storekeeper protein-related transcriptional regulator	protein_coding	NA	NA	-1.18927	3.5417	0.045999
AT2G20440	Ypt/Rab-GAP domain of gyp1p superfamily protein	protein_coding	NA	NA	-1.18944	2.99768	0.043351
AT5G16590	Leucine-rich repeat protein kinase family protein	protein_coding	NA	LRR1,Leucine rich repeat protein 1	-1.19026	4.45253	0.021081
AT4G18030	S-adenosyl-L-methionine-dependent methyltransferases superfamily protein	protein_coding	NA	NA	-1.19168	6.83782	0.030148
AT2G04240	RING/U-box superfamily protein	protein_coding	NA	NA	-1.19284	4.6353	0.046632
AT5G09240	ssDNA-binding transcriptional regulator	protein_coding	NA	NA	-1.19439	2.18751	0.024008
AT1G69910	Protein kinase superfamily protein	protein_coding	NA	NA	-1.19444	3.0893	0.018857
AT1G05470	DNAse I-like superfamily protein	protein_coding	COTYLEDON VASCULAR PATTERN 2	NA	-1.19477	2.75655	0.047165
AT5G64040	photosystem I reaction center subunit PSI-N%2C chloroplast%2C putative / PSI-N%2C putative (PSAN)	protein_coding	NA	NA	-1.19591	10.6548	0.035332
AT4G38660	Pathogenesis-related thaumatin superfamily protein	protein_coding	NA	NA	-1.19901	3.35506	0.041188
AT1G11850	transmembrane protein	protein_coding	NA	NA	-1.20079	3.69599	0.043203
AT1G03830	guanylate-binding family protein	protein_coding	NA	NA	-1.20201	2.8437	0.018545
AT3G46970	alpha-glucan phosphorylase 2	protein_coding	alpha-glucan phosphorylase 2	ATPHS2,Arabidopsis thaliana alpha-glucan phosphorylase 2	-1.20337	10.0226	0.043351
AT2G46110	ketopantoate hydroxymethyltransferase 1	protein_coding	ketopantoate hydroxymethyltransferase 1	PANB1	-1.20358	2.84801	0.046016
AT1G60525	Natural antisense transcript overlaps with AT1G60530	antisense_long_noncoding_rna	NA	NA	-1.2045	3.61829	0.039787
AT3G16850	Pectin lyase-like superfamily protein	protein_coding	NA	NA	-1.20453	5.78732	0.044511
AT5G14570	high affinity nitrate transporter 2.7	protein_coding	high affinity nitrate transporter 2.7	ATNRT2.7,high affinity nitrate transporter 2.7	-1.20588	4.96644	0.048722
AT2G43800	Actin-binding FH2 (formin homology 2) family protein	protein_coding	NA	NA	-1.20623	3.34615	0.048722
AT4G30760	Putative endonuclease or glycosyl hydrolase	protein_coding	NA	NA	-1.20813	4.88298	0.007529
AT5G11160	adenine phosphoribosyltransferase 5	protein_coding	adenine phosphoribosyltransferase 5	NA	-1.20929	1.75024	0.040833
AT5G07240	IQ-domain 24	protein_coding	IQ-domain 24	NA	-1.21093	5.48236	0.011416
AT5G05180	myosin heavy chain%2C striated protein	protein_coding	NA	NA	-1.21121	1.61615	0.043219
AT1G76360	Protein kinase superfamily protein	protein_coding	NA	NA	-1.21153	4.75677	0.025593
AT5G60450	auxin response factor 4	protein_coding	auxin response factor 4	NA	-1.21475	4.80787	0.015826
AT4G21750	Homeobox-leucine zipper family protein / lipid-binding START domain-containing protein	protein_coding	MERISTEM LAYER 1	NA	-1.21508	6.10614	0.048653
AT5G66560	Phototropic-responsive NPH3 family protein	protein_coding	NA	NA	-1.21527	3.74994	0.025145
AT3G05330	cyclin family	protein_coding	TANGLED	ATTAN,A. THALIANA TAN1	-1.21918	1.39319	0.049954
AT1G22610	C2 calcium/lipid-binding plant phosphoribosyltransferase family protein	protein_coding	NA	NA	-1.22035	5.97556	0.025589
AT4G37100	Pyridoxal phosphate (PLP)-dependent transferases superfamily protein	protein_coding	NA	NA	-1.22086	3.41114	0.008054
AT2G29730	UDP-glucosyl transferase 71D1	protein_coding	UDP-glucosyl transferase 71D1	NA	-1.22144	2.39952	0.026953
AT1G13250	galacturonosyltransferase-like 3	protein_coding	galacturonosyltransferase-like 3	NA	-1.22375	4.19315	0.016972
AT3G45443	hypothetical protein	protein_coding	NA	NA	-1.22447	3.25334	0.010521
AT4G36470	S-adenosyl-L-methionine-dependent methyltransferases superfamily protein	protein_coding	NA	NA	-1.22528	1.51088	0.049876
AT4G05190	kinesin 5	protein_coding	kinesin 5	NA	-1.22581	1.73162	0.038087
AT2G02070	indeterminate(ID)-domain 5	protein_coding	indeterminate(ID)-domain 5	AtIDD5,indeterminate(ID)-domain 5	-1.22588	5.86337	0.031532
AT4G15450	Senescence/dehydration-associated protein-like protein	protein_coding	NA	NA	-1.22693	4.69579	0.021521
AT5G20030	Plant Tudor-like RNA-binding protein	protein_coding	NA	NA	-1.22769	1.34153	0.038719
AT5G59980	Polymerase/histidinol phosphatase-like protein	protein_coding	GAMETOPHYTE DEFECTIVE 1	AtRPP30,RPP30	-1.22941	2.97121	0.028271
AT4G35930	F-box family protein	protein_coding	F-box stress induced 4	AtFBS4	-1.23091	2.36578	0.023185
AT5G55480	SHV3-like 1	protein_coding	SHV3-like 1	GDPDL4,Glycerophosphodiester phosphodiesterase (GDPD) like 4,GPDL1,glycerophosphodiesterase-like 1	-1.23093	4.03071	0.049312
AT1G08280	Glycosyltransferase family 29 (sialyltransferase) family protein	protein_coding	NA	GALT29A,glycosyltransferase 29A	-1.23137	2.9221	0.02746
AT1G11820	O-Glycosyl hydrolases family 17 protein	protein_coding	NA	NA	-1.23165	5.38207	0.011684
AT1G68530	3-ketoacyl-CoA synthase 6	protein_coding	3-ketoacyl-CoA synthase 6	AtCUT1,CER6,ECERIFERUM 6,CUT1,CUTICULAR 1,G2,POP1,POLLEN-PISTIL INCOMPATIBILITY 1	-1.233	8.23026	0.021081
AT1G04110	Subtilase family protein	protein_coding	STOMATAL DENSITY AND DISTRIBUTION 1	AtSDD1	-1.23307	2.26918	0.049646
AT1G75310	auxin-like 1 protein	protein_coding	auxilin-like 1	NA	-1.23422	4.38657	0.007529
AT1G10850	Leucine-rich repeat protein kinase family protein	protein_coding	NA	NA	-1.23474	2.98724	0.013379
AT1G79080	Pentatricopeptide repeat (PPR) superfamily protein	protein_coding	NA	NA	-1.23524	3.99647	0.03443
AT5G19780	tubulin alpha-5	protein_coding	tubulin alpha-5	NA	-1.23528	6.8988	0.009252
AT1G64670	alpha/beta-Hydrolases superfamily protein	protein_coding	BODYGUARD1	CED1,9-CIS EPOXYCAROTENOID DIOXYGENASE DEFECTIVE 1	-1.23537	3.08243	0.018483
AT4G27720	Major facilitator superfamily protein	protein_coding	NA	NA	-1.23617	5.83456	0.017793
AT5G06150	Cyclin family protein	protein_coding	NA	NA	-1.23803	1.50146	0.047982
AT1G17255	Natural antisense transcript overlaps with AT1G17250	antisense_long_noncoding_rna	NA	NA	-1.23808	1.95922	0.039923
AT1G44780	translation initiation factor	protein_coding	NA	NA	-1.24026	2.66845	0.020986
AT2G21590	Glucose-1-phosphate adenylyltransferase family protein	protein_coding	NA	NA	-1.24448	2.78067	0.039888
AT3G53320	mediator of RNA polymerase II transcription subunit-like protein	protein_coding	NA	NA	-1.24577	2.20087	0.036535
AT3G06130	Heavy metal transport/detoxification superfamily protein	protein_coding	NA	NA	-1.24603	3.21668	0.009252
AT1G22030	BPS1-like protein	protein_coding	NA	NA	-1.24647	0.560776	0.036818
AT1G09900	Pentatricopeptide repeat (PPR-like) superfamily protein	protein_coding	NA	NA	-1.24658	4.34488	0.016877
AT3G02250	O-fucosyltransferase family protein	protein_coding	NA	NA	-1.24818	5.64059	0.024966
AT2G17230	EXORDIUM like 5	protein_coding	EXORDIUM like 5	NA	-1.24874	4.05338	0.024303
AT3G05910	Pectinacetylesterase family protein	protein_coding	NA	NA	-1.24939	6.35348	0.036111
AT4G17360	Formyl transferase	protein_coding	NA	NA	-1.24957	4.00939	0.048592
AT1G34340	alpha/beta-Hydrolases superfamily protein	protein_coding	NA	NA	-1.25032	4.67794	0.009761
AT5G38050	RNA polymerase II transcription elongation factor	protein_coding	NA	NA	-1.25554	2.20135	0.02253
AT1G63420	O-glucosyltransferase-like protein (DUF821)	protein_coding	NA	NA	-1.25674	3.43941	0.033215
AT1G17840	white-brown complex-like protein	protein_coding	ATP-binding cassette G11	ATWBC11,ARABIDOPSIS THALIANA WHITE-BROWN COMPLEX HOMOLOG PROTEIN 11,AtABCG11,COF1,CUTICULAR DEFECT AND ORGAN FUSION 1,DSO,DESPERADO,WBC11,white-brown complex homolog protein 11	-1.25747	6.16383	0.019455
AT1G15480	Tetratricopeptide repeat (TPR)-like superfamily protein	protein_coding	NA	NA	-1.25833	2.59602	0.026479
AT1G11320	GDSL esterase/lipase	protein_coding	NA	NA	-1.25898	1.78274	0.040984
AT3G25500	formin homology 1	protein_coding	formin homology 1	AHF1,ATFH1,ARABIDOPSIS THALIANA FORMIN HOMOLOGY 1,FH1,FORMIN HOMOLOGY 1	-1.26015	5.27837	0.007244
AT5G51350	Leucine-rich repeat transmembrane protein kinase family protein	protein_coding	MORE LATERAL GROWTH1	NA	-1.26114	3.16508	0.022728
AT2G18520	Tetratricopeptide repeat (TPR)-like superfamily protein	protein_coding	NA	NA	-1.26139	1.18829	0.033774
AT4G36970	Remorin family protein	protein_coding	NA	NA	-1.26149	4.17827	0.023533
AT5G02180	Transmembrane amino acid transporter family protein	protein_coding	NA	NA	-1.26166	5.00673	0.024008
AT3G24560	Adenine nucleotide alpha hydrolases-like superfamily protein	protein_coding	RASPBERRY 3	NA	-1.26197	2.61181	0.039259
AT4G08700	Drug/metabolite transporter superfamily protein	protein_coding	NA	NA	-1.26363	3.37716	0.031305
AT2G36010	E2F transcription factor 3	protein_coding	E2F transcription factor 3	ATE2FA	-1.26484	2.14098	0.025815
AT1G75820	Leucine-rich receptor-like protein kinase family protein	protein_coding	CLAVATA 1	ATCLV1,FAS3,FASCIATA 3,FLO5,FLOWER DEVELOPMENT 5	-1.26842	5.73035	0.041458
AT2G29980	fatty acid desaturase 3	protein_coding	fatty acid desaturase 3	AtFAD3	-1.26895	7.07661	0.048971
AT2G37230	Tetratricopeptide repeat (TPR)-like superfamily protein	protein_coding	NA	NA	-1.271	4.34747	0.022195
AT5G09175	Natural antisense transcript overlaps with AT5G64000	antisense_long_noncoding_rna	NA	NA	-1.27168	1.18359	0.039068
AT5G58600	Pmr5/Cas1p GDSL/SGNH-like acyl-esterase family protein (DUF828)	protein_coding	POWDERY MILDEW RESISTANT 5	TBL44,TRICHOME BIREFRINGENCE-LIKE 44	-1.27205	3.73671	0.023548
AT4G02130	galacturonosyltransferase 6	protein_coding	galacturonosyltransferase 6	LGT10	-1.27233	5.81946	0.027094
AT3G07460	transmembrane protein%2C putative (Protein of unknown function%2C DUF538)	protein_coding	NA	NA	-1.27406	6.36163	0.018483
AT1G08560	syntaxin of plants 111	protein_coding	syntaxinof plants 111	ATSYP111,KN,KNOLLE	-1.27563	2.25985	0.034946
AT1G50240	kinase family with ARM repeat domain-containing protein	protein_coding	FUSED	NA	-1.27601	1.41786	0.043341
AT2G22410	SLOW GROWTH 1	protein_coding	SLOW GROWTH 1	NA	-1.27607	1.16598	0.030114
AT2G26640	3-ketoacyl-CoA synthase 11	protein_coding	3-ketoacyl-CoA synthase 11	NA	-1.27713	4.65039	0.015605
AT1G62330	O-fucosyltransferase family protein	protein_coding	NA	NA	-1.27729	4.52376	0.013513
AT5G15010	Tetratricopeptide repeat (TPR)-like superfamily protein	protein_coding	NA	NA	-1.27878	1.8731	0.027361
AT5G02520	dentin sialophosphoprotein-like protein	protein_coding	NA	KNL2,KINETOCHORE NULL 2	-1.27887	0.30034	0.047942
AT3G18524	MUTS homolog 2	protein_coding	MUTS homolog 2	ATMSH2	-1.27895	2.47588	0.025436
AT3G61610	Galactose mutarotase-like superfamily protein	protein_coding	NA	NA	-1.28543	1.48513	0.038759
AT1G12860	basic helix-loop-helix (bHLH) DNA-binding superfamily protein	protein_coding	SCREAM 2	ICE2,INDUCER OF CBF EXPRESSION 2	-1.28556	4.55535	0.025815
AT3G09035	Concanavalin A-like lectin family protein	protein_coding	NA	NA	-1.28643	3.44188	0.032149
AT3G61260	Remorin family protein	protein_coding	NA	NA	-1.28659	6.66601	0.030899
AT3G05470	Actin-binding FH2 (formin homology 2) family protein	protein_coding	NA	NA	-1.28677	1.608	0.041458
AT1G63470	AT hook motif DNA-binding family protein	protein_coding	NA	AHL5,AT-hook motif nuclear localized protein 5	-1.29036	2.8575	0.03297
AT5G56890	Protein kinase superfamily protein	protein_coding	NA	NA	-1.29135	5.14938	0.003998
AT4G29910	origin recognition complex protein 5	protein_coding	origin recognition complex protein 5	ATORC5,EMB2798,EMBRYO DEFECTIVE 2798	-1.29292	2.7576	0.028979
AT2G34680	Outer arm dynein light chain 1 protein	protein_coding	AUXIN-INDUCED IN ROOT CULTURES 9	NA	-1.29314	5.55847	0.028803
AT1G64583	Tetratricopeptide repeat (TPR)-like superfamily protein	protein_coding	NA	NA	-1.29349	0.045298	0.041919
AT1G64330	myosin heavy chain-like protein	protein_coding	NA	NA	-1.29385	4.753	0.012801
AT5G60710	Zinc finger (C3HC4-type RING finger) family protein	protein_coding	NA	NA	-1.29455	5.33259	0.010589
AT2G29620	dentin sialophosphoprotein	protein_coding	NA	NA	-1.29479	0.278584	0.044736
AT2G36350	Protein kinase superfamily protein	protein_coding	NA	NA	-1.29702	4.20196	0.019032
AT2G22125	binding protein	protein_coding	cellulose synthase-interactive protein 1	POM2,POM-POM 2	-1.2972	6.98328	0.006403
AT3G46990	DUF740 family protein%2C putative (DUF740)	protein_coding	NA	NA	-1.29863	1.86924	0.018032
AT1G71710	DNAse I-like superfamily protein	protein_coding	NA	NA	-1.30101	5.87137	0.008512
AT5G17580	Phototropic-responsive NPH3 family protein	protein_coding	NA	NA	-1.30112	2.32402	0.043203
AT5G41130	Esterase/lipase/thioesterase family protein	protein_coding	NA	NA	-1.30154	2.56676	0.009062
AT1G55760	BTB/POZ domain-containing protein	protein_coding	NA	NA	-1.30603	2.09117	0.039752
AT5G47240	nudix hydrolase homolog 8	protein_coding	nudix hydrolase homolog 8	NUDX8,nudix hydrolase homolog 8,atnudt8,nudix hydrolase homolog 8	-1.3075	6.26849	0.016322
AT1G55360	tRNA-splicing ligase (DUF239)	protein_coding	NA	NA	-1.30762	5.71548	0.010307
AT2G34920	RING/U-box superfamily protein	protein_coding	embryo sac development arrest 18	NA	-1.30788	1.10027	0.026479
AT5G17160	aspartic/glutamic acid-rich protein	protein_coding	NA	NA	-1.30865	1.73022	0.041986
AT3G48250	Pentatricopeptide repeat (PPR) superfamily protein	protein_coding	Buthionine sulfoximine-insensitive roots 6	NA	-1.3101	2.60189	0.036535
AT1G50055	other_RNA	other_rna	NA	NA	-1.31034	2.0313	0.014793
AT3G25700	Eukaryotic aspartyl protease family protein	protein_coding	NA	NA	-1.31293	3.54283	0.046786
AT5G05940	ROP guanine nucleotide exchange factor 5	protein_coding	ROP (rho of plants) guanine nucleotide exchange factor 5	ATROPGEF5,ROP GUANINE NUCLEOTIDE EXCHANGE FACTOR 5	-1.31358	1.20613	0.036212
AT2G13610	ABC-2 type transporter family protein	protein_coding	ATP-binding cassette G5	NA	-1.31437	2.45704	0.044738
AT2G28620	P-loop containing nucleoside triphosphate hydrolases superfamily protein	protein_coding	NA	NA	-1.31664	2.36318	0.036663
AT2G07170	ARM repeat superfamily protein	protein_coding	NA	NA	-1.3167	0.548655	0.031137
AT3G43720	Bifunctional inhibitor/lipid-transfer protein/seed storage 2S albumin superfamily protein	protein_coding	glycosylphosphatidylinositol-anchored lipid protein transfer 2	NA	-1.31822	5.20557	0.018338
AT2G28950	expansin A6	protein_coding	expansin A6	ATEXP6,ARABIDOPSIS THALIANA TEXPANSIN 6,ATEXPA6,expansin A6,ATHEXP ALPHA 1.8	-1.31911	6.36368	0.008054
AT2G26730	Leucine-rich repeat protein kinase family protein	protein_coding	NA	NA	-1.31975	6.04041	0.018146
AT3G13190	WEB family protein (DUF827)	protein_coding	NA	NA	-1.32102	2.78894	0.015617
AT2G15050	lipid transfer protein	protein_coding	lipid transfer protein	LTP7,lipid transfer protein 7	-1.32143	5.80298	0.036989
AT4G21585	endonuclease 4	protein_coding	endonuclease 4	NA	-1.32328	2.28514	0.041714
AT5G51750	subtilase 1.3	protein_coding	subtilase 1.3	ATSBT1.3,subtilase 1.3	-1.324	4.30604	0.016357
AT5G18475	Pentatricopeptide repeat (PPR) superfamily protein	protein_coding	NA	NA	-1.32434	2.23219	0.024947
AT4G39350	cellulose synthase A2	protein_coding	cellulose synthase A2	ATCESA2,ATH-A	-1.32496	7.33114	0.01623
AT1G26150	proline-rich extensin-like receptor kinase 10	protein_coding	proline-rich extensin-like receptor kinase 10	AtPERK10,proline-rich extensin-like receptor kinase 10	-1.32606	6.56853	0.047313
AT3G51075	Natural antisense transcript overlaps with AT3G51070	antisense_long_noncoding_rna	NA	NA	-1.32633	2.63737	0.017849
[truncated: 659 more rows]

## Sheet: Supplementary Dataset 5
Supplementary Dataset 5 Differentially expressed genes following triggering stress in primed plants
Differentially expressed genes identified using the edgeR-quasi-likelihood pipeline (FDR < 0.05) between primed and primed-triggered plants (P+T/P).
Locus Identifier	Gene Model Description	Gene Model Type	Primary Gene Symbol	Other Gene Symbols	log2 FC	Average log2 CPM	FDR adjusted P-value
AT4G29340	profilin 4	protein_coding	profilin 4	NA	5.19336	1.82623	0.025346
AT4G29770	target of trans acting-siR480/255 protein	protein_coding	NA	HTT1,HEAT-INDUCED TAS1 TARGET 1	4.88465	-0.07241	0.018849
AT3G08970	DNAJ heat shock N-terminal domain-containing protein	protein_coding	NA	NA	4.6715	7.25762	0.020562
AT5G64510	tunicamycin induced protein	protein_coding	tunicamycin induced 1	NA	4.49316	7.21519	0.033866
AT3G15340	proton pump interactor 2	protein_coding	proton pump interactor 2	NA	4.43634	3.36318	0.024081
AT5G42020	Heat shock protein 70 (Hsp 70) family protein	protein_coding	NA	NA	4.27565	9.99826	0.005426
AT5G53048	Natural antisense transcript overlaps with AT5G53050	antisense_long_noncoding_rna	NA	NA	4.24396	1.98659	0.034062
AT5G02490	Heat shock protein 70 (Hsp 70) family protein	protein_coding	NA	NA	4.1868	8.55186	0.010889
AT1G56170	nuclear factor Y%2C subunit C2	protein_coding	nuclear factor Y%2C subunit C2	ATHAP5B,HAP5B	4.08035	5.49586	0.00431
AT3G53230	ATPase%2C AAA-type%2C CDC48 protein	protein_coding	cell division cycle 48B	NA	4.06428	8.17816	0.021967
AT3G17790	purple acid phosphatase 17	protein_coding	purple acid phosphatase 17	ATACP5,ATPAP17	4.00422	6.26438	0.008301
AT1G54050	HSP20-like chaperones superfamily protein	protein_coding	NA	NA	3.9971	8.13601	0.046266
AT5G12110	elongation factor 1-beta 1	protein_coding	NA	NA	3.94119	8.24452	0.033885
AT1G04980	PDI-like 2-2	protein_coding	PDI-like 2-2	ATPDI10,ARABIDOPSIS THALIANA PROTEIN DISULFIDE ISOMERASE 10,ATPDIL2-2,PDI-like 2-2,PDI10,PROTEIN DISULFIDE ISOMERASE	3.89263	6.42072	0.007817
AT1G14360	UDP-galactose transporter 3	protein_coding	UDP-galactose transporter 3	ATUTR3	3.65154	6.94991	0.003393
AT5G56030	heat shock protein 81-2	protein_coding	heat shock protein 81-2	AtHsp90.2,HEAT SHOCK PROTEIN 90.2,ERD8,EARLY-RESPONSIVE TO DEHYDRATION 8,HSP81.2,heat shock protein 81.2,HSP90.2,HEAT SHOCK PROTEIN90.2	3.62159	11.3568	0.031925
AT5G28540	heat shock protein 70 (Hsp 70) family protein	protein_coding	NA	NA	3.61892	9.98092	0.006421
AT1G11100	SNF2 domain-containing protein / helicase domain-containing protein / zinc finger protein-like protein	protein_coding	NA	FRG5,SNF2-RING-HELICASE?LIKE 5	3.50856	2.6079	0.011285
AT4G29520	nucleophosmin	protein_coding	NA	NA	3.46546	6.89546	0.010844
AT1G21550	Calcium-binding EF-hand family protein	protein_coding	NA	NA	3.45336	6.34985	0.042453
AT2G02810	UDP-galactose transporter 1	protein_coding	UDP-galactose transporter 1	ATUTR1,UDP-GALACTOSE TRANSPORTER 1	3.42968	5.77673	0.005426
AT3G25230	rotamase FKBP 1	protein_coding	rotamase FKBP 1	ATFKBP62,FKBP62,FK506 BINDING PROTEIN 62	3.41891	9.18873	0.008609
AT3G14620	cytochrome P450%2C family 72%2C subfamily A%2C polypeptide 8	protein_coding	cytochrome P450%2C family 72%2C subfamily A%2C polypeptide 8	NA	3.38889	8.02217	0.032552
AT5G61790	calnexin 1	protein_coding	calnexin 1	ATCNX1	3.35388	9.74999	0.008609
AT3G51860	cation exchanger 3	protein_coding	cation exchanger 3	ATCAX3,ATHCX1,CAX1-LIKE	3.28422	5.89177	0.018583
AT3G02040	senescence-related gene 3	protein_coding	senescence-related gene 3	AtGDPD1,GDPD1,Glycerophosphodiester phosphodiesterase 1	3.27268	3.91272	0.011872
AT3G17130	Plant invertase/pectin methylesterase inhibitor superfamily protein	protein_coding	NA	NA	3.21215	2.47328	0.011926
AT2G29450	glutathione S-transferase tau 5	protein_coding	glutathione S-transferase tau5	AT103-1A,ATGSTU1,ARABIDOPSIS THALIANA GLUTATHIONE S-TRANSFERASE TAU1,ATGSTU5,glutathione S-transferase tau5	3.20701	10.0412	0.004699
AT3G53830	Regulator of chromosome condensation (RCC1) family protein	protein_coding	NA	NA	3.19106	5.64819	0.00431
AT5G56010	heat shock protein 81-3	protein_coding	heat shock protein 81-3	AtHsp90-3,HEAT SHOCK PROTEIN 90-3,AtHsp90.3,HEAT SHOCK PROTEIN 90.3,Hsp81.3,HEAT SHOCK PROTEIN 81.3	3.1447	10.3817	0.042504
AT2G37180	Aquaporin-like superfamily protein	protein_coding	RESPONSIVE TO DESICCATION 28	PIP2%3B3,PLASMA MEMBRANE INTRINSIC PROTEIN 2%3B3,PIP2C,PLASMA MEMBRANE INTRINSIC PROTEIN 2C	3.13869	7.61581	0.014562
AT5G18340	ARM repeat superfamily protein	protein_coding	NA	NA	3.12801	2.73485	0.038945
AT3G13470	TCP-1/cpn60 chaperonin family protein	protein_coding	chaperonin-60beta2	NA	3.09301	9.31983	0.001373
AT2G19310	HSP20-like chaperones superfamily protein	protein_coding	NA	NA	3.08172	8.39444	0.033988
AT3G07090	PPPDE putative thiol peptidase family protein	protein_coding	NA	NA	3.02402	8.07859	0.022043
AT4G23493	hypothetical protein	protein_coding	NA	NA	3.02208	2.37675	0.036322
AT5G58770	Undecaprenyl pyrophosphate synthetase family protein	protein_coding	cis-prenyltransferase 4	AtcPT4	3.02155	7.31254	0.023331
AT1G73066	Leucine-rich repeat family protein	protein_coding	NA	NA	3.02087	1.65816	0.021537
AT5G23480	SWIB/MDM2%2C Plus-3 and GYF domain-containing protein	protein_coding	NA	NA	2.96047	3.98566	0.010119
AT3G12050	Aha1 domain-containing protein	protein_coding	NA	NA	2.95943	7.95796	0.021254
AT2G41150	plant/protein	protein_coding	NA	NA	2.95366	3.05766	0.00431
AT4G23570	phosphatase-like protein	protein_coding	NA	NA	2.92749	7.96052	0.021045
AT5G53400	HSP20-like chaperones superfamily protein	protein_coding	BOBBER1	NA	2.88345	6.6757	0.01033
AT3G04710	ankyrin repeat family protein	protein_coding	tetratricopeptide repeat 10	NA	2.84846	5.98296	0.013094
AT4G24190	Chaperone protein htpG family protein	protein_coding	SHEPHERD	AtHsp90-7,HEAT SHOCK PROTEIN 90-7,AtHsp90.7,HEAT SHOCK PROTEIN 90.7,HSP90.7,HEAT SHOCK PROTEIN 90.7	2.84762	10.5395	0.016558
AT5G03160	DnaJ P58IPK-like protein	protein_coding	homolog of mamallian P58IPK	ATP58IPK,homolog of mamallian P58IPK	2.791	6.93734	0.005688
AT1G56600	galactinol synthase 2	protein_coding	galactinol synthase 2	AtGolS2,galactinol synthase 2	2.75464	3.14346	0.02142
AT3G62600	DNAJ heat shock family protein	protein_coding	NA	NA	2.74074	7.72704	0.017424
AT1G07823	Natural antisense transcript overlaps with AT1G52580	antisense_long_noncoding_rna	NA	NA	2.73023	0.382185	0.005773
AT2G37900	Major facilitator superfamily protein	protein_coding	NA	NA	2.71986	2.25692	0.026614
AT1G27330	Ribosome associated membrane protein RAMP4	protein_coding	NA	NA	2.70995	6.96703	0.010844
AT1G79920	Heat shock protein 70 (Hsp 70) family protein	protein_coding	heat shock protein 70-15	AtHsp70-15	2.7031	9.14983	0.008301
AT5G09590	mitochondrial HSO70 2	protein_coding	mitochondrial HSO70 2	HSC70-5,HEAT SHOCK COGNATE	2.70122	8.56061	0.024136
AT3G03520	non-specific phospholipase C3	protein_coding	non-specific phospholipase C3	NA	2.68649	4.42743	0.00997
AT2G24680	transcriptional factor B3 family protein	protein_coding	NA	NA	2.65417	1.04634	0.007964
AT5G65350	histone 3 11	protein_coding	histone 3 11	NA	2.64464	0.832822	0.02929
AT4G29330	DERLIN-1	protein_coding	DERLIN-1	NA	2.55557	6.57547	0.005426
AT2G08730	Natural antisense transcript overlaps with AT2G35420	antisense_long_noncoding_rna	NA	NA	2.55449	1.24126	0.010844
AT1G65040	RING/U-box superfamily protein	protein_coding	homolog of yeast Hrd1	AtHrd1B,homolog of yeast Hrd1	2.53308	6.8198	0.009571
AT2G41070	Basic-leucine zipper (bZIP) transcription factor family protein	protein_coding	ENHANCED EM LEVEL	ATBZIP12,DPBF4	2.52776	1.02143	0.017472
AT3G17611	RHOMBOID-like protein 14	protein_coding	RHOMBOID-like protein 14	ATRBL10,RHOMBOID-like protein 10,ATRBL14,RHOMBOID-like protein 14,RBL10,RHOMBOID-like protein 10	2.52468	4.72045	0.038581
AT3G24090	putative glucosamine-fructose-6-phosphate aminotransferase	protein_coding	L-glutamine D-fructose-6-phosphate amidotransferase	NA	2.4705	4.14453	0.019479
AT2G25110	stromal cell-derived factor 2-like protein precursor	protein_coding	stromal cell-derived factor 2-like protein precursor	ATSDL,ATSDF2-LIKE,AtSDF2,Arabidopsis thaliana STROMAL CELL-DERIVED FACTOR 2-like protein precursor	2.46355	7.0533	0.008205
AT3G23990	heat shock protein 60	protein_coding	heat shock protein 60	NA	2.45657	8.10783	0.006053
AT2G47730	glutathione S-transferase phi 8	protein_coding	glutathione S-transferase phi 8	ATGSTF5,GLUTATHIONE S-TRANSFERASE (CLASS PHI) 5,ATGSTF8,Arabidopsis thaliana glutathione S-transferase phi 8,GST6	2.43928	9.79533	0.028461
AT1G09210	calreticulin 1b	protein_coding	calreticulin 1b	AtCRT1b	2.40402	8.86538	0.041516
AT1G77510	PDI-like 1-2	protein_coding	PDI-like 1-2	ATPDI6,PROTEIN DISULFIDE ISOMERASE 6,ATPDIL1-2,PDI-like 1-2,PDI6,PROTEIN DISULFIDE ISOMERASE 6	2.39138	7.7426	0.032902
AT2G21130	Cyclophilin-like peptidyl-prolyl cis-trans isomerase family protein	protein_coding	NA	NA	2.3868	6.57064	0.018201
AT3G19270	cytochrome P450%2C family 707%2C subfamily A%2C polypeptide 4	protein_coding	cytochrome P450%2C family 707%2C subfamily A%2C polypeptide 4	NA	2.38315	2.84466	0.047419
AT3G51980	ARM repeat superfamily protein	protein_coding	NA	NA	2.37182	6.08304	0.010119
AT5G26660	myb domain protein 86	protein_coding	myb domain protein 86	ATMYB86,myb domain protein 86	2.36088	-0.37582	0.020562
AT1G27350	Ribosome associated membrane protein RAMP4	protein_coding	NA	NA	2.35684	6.69738	0.010119
AT2G32920	PDI-like 2-3	protein_coding	PDI-like 2-3	ATPDI9,ARABIDOPSIS THALIANA PROTEIN DISULFIDE ISOMERASE 9,ATPDIL2-3,PDI-like 2-3,PDI9,PROTEIN DISULFIDE ISOMERASE 9	2.35468	7.40719	0.015416
AT4G34630	prostatic spermine-binding-like protein	protein_coding	NA	NA	2.35386	5.83047	0.012796
AT1G64200	vacuolar H+-ATPase subunit E isoform 3	protein_coding	vacuolar H+-ATPase subunit E isoform 3	NA	2.34551	6.74151	0.031061
AT5G37260	Homeodomain-like superfamily protein	protein_coding	REVEILLE 2	CIR1,CIRCADIAN 1	2.34064	3.107	0.018583
AT1G31280	Argonaute family protein	protein_coding	argonaute 2	AtAGO2	2.32523	6.19021	0.032511
AT1G56440	Tetratricopeptide repeat (TPR)-like superfamily protein	protein_coding	tetratricopeptide repeat 5	NA	2.3233	4.75996	0.007443
AT2G30480	hypothetical protein	protein_coding	NA	NA	2.31677	3.30826	0.008301
AT4G16660	heat shock protein 70 (Hsp 70) family protein	protein_coding	NA	NA	2.30793	8.4661	0.011072
AT5G54860	Major facilitator superfamily protein	protein_coding	NA	NA	2.27176	5.34123	0.026614
AT5G18065	target of trans acting-siR480/255 protein	protein_coding	NA	HTT3,HEAT-INDUCED TAS1 TARGET 3	2.25942	2.69977	0.021064
AT5G58590	RAN binding protein 1	protein_coding	RAN binding protein 1	NA	2.24138	5.93968	0.003393
AT1G04130	Tetratricopeptide repeat (TPR)-like superfamily protein	protein_coding	tetratricopeptide repeat 2	AtTPR2	2.24038	4.61547	0.015416
AT1G26800	RING/U-box superfamily protein	protein_coding	NA	NA	2.23611	4.91628	0.045843
AT3G13020	hAT transposon superfamily protein	protein_coding	NA	NA	2.21494	0.796865	0.016462
AT3G44110	DNAJ homologue 3	protein_coding	NA	NA	2.1908	9.45716	0.020863
AT4G24150	growth-regulating factor 8	protein_coding	growth-regulating factor 8	AtGRF8,growth-regulating factor 8,AtMIN10	2.18409	1.38563	0.010889
AT5G47920	transcription elongation factor	protein_coding	NA	NA	2.18324	0.450663	0.029175
AT4G30500	transmembrane protein (DUF788)	protein_coding	NA	NA	2.17658	3.28727	0.025791
AT5G02500	heat shock cognate protein 70-1	protein_coding	heat shock cognate protein 70-1	AT-HSC70-1,ARABIDOPSIS THALIANA HEAT SHOCK COGNATE PROTEIN 70-1,AtHsp70-1,HSC70,HEAT SHOCK COGNATE PROTEIN 70,HSP70-1,HEAT SHOCK PROTEIN 70-1	2.17533	12.0758	0.00997
AT4G27652	hypothetical protein	protein_coding	NA	NA	2.16483	2.76686	0.037389
AT2G46940	fold protein	protein_coding	NA	NA	2.15576	1.03538	0.048626
AT2G44660	ALG6%2C ALG8 glycosyltransferase family	protein_coding	NA	NA	2.15409	4.16432	0.005426
AT1G57820	Zinc finger (C3HC4-type RING finger) family protein	protein_coding	VARIANT IN METHYLATION 1	ORTH2,ORTHRUS 2	2.1447	4.15242	0.00431
AT1G56340	calreticulin 1a	protein_coding	calreticulin 1a	AtCRT1a,CRT1,calreticulin 1	2.13048	8.76739	0.016462
AT5G47420	Tryptophan RNA-binding attenuator protein-like protein	protein_coding	NA	NA	2.12768	4.95758	0.004819
AT1G35660	erythroid differentiation factor-like protein	protein_coding	NA	NA	2.08931	5.20075	0.017323
AT1G14980	chaperonin 10	protein_coding	chaperonin 10	NA	2.08353	7.22576	0.004699
AT4G26270	phosphofructokinase 3	protein_coding	phosphofructokinase 3	NA	2.07337	5.68403	0.038945
AT1G01660	RING/U-box superfamily protein	protein_coding	NA	NA	2.05631	0.710086	0.026272
AT1G52570	phospholipase D alpha 2	protein_coding	phospholipase D alpha 2	NA	2.05556	2.38544	0.010819
AT2G04030	Chaperone protein htpG family protein	protein_coding	NA	NA	2.02023	9.31004	0.005773
AT1G62740	stress-inducible protein	protein_coding	Hop2	NA	1.95845	7.17306	0.018565
AT4G03960	Phosphotyrosine protein phosphatases superfamily protein	NA	NA	NA	1.957	3.59985	0.011445
AT1G02460	Pectin lyase-like superfamily protein	protein_coding	NA	NA	1.95452	3.36135	0.014286
AT4G31354	hypothetical protein	protein_coding	NA	NA	1.94268	1.49246	0.036021
AT1G07890	ascorbate peroxidase 1	protein_coding	ascorbate peroxidase 1	ATAPX01,ATAPX1,CS1,MEE6,maternal effect embryo arrest 6	1.94141	10.596	0.010889
AT2G20940	transmembrane protein%2C putative (DUF1279)	protein_coding	NA	NA	1.93958	3.58027	0.017721
AT2G41160	Ubiquitin-associated (UBA) protein	protein_coding	NA	NA	1.92988	5.51278	0.025953
AT1G09140	SERINE-ARGININE PROTEIN 30	protein_coding	Serine/Arginine-Rich Protein Splicing Factor 30	ATSRP30.1,ATSRP30.2,ATSRP30,SERINE-ARGININE PROTEIN 30,At-SR30,Serine/Arginine-Rich Protein Splicing Factor 30	1.91828	7.48282	0.016558
AT5G53120	spermidine synthase 3	protein_coding	spermidine synthase 3	ATSPDS3,SPERMIDINE SYNTHASE 3,SPMS	1.91371	6.54799	0.045141
AT3G60720	plasmodesmata-located protein 8	protein_coding	plasmodesmata-located protein 8	NA	1.91239	3.36515	0.009155
AT1G10960	ferredoxin 1	protein_coding	ferredoxin 1	ATFD1,ferredoxin 1	1.90856	9.38173	0.005688
AT4G33030	sulfoquinovosyldiacylglycerol 1	protein_coding	sulfoquinovosyldiacylglycerol 1	NA	1.90599	7.23067	0.016587
AT2G36460	Aldolase superfamily protein	protein_coding	fructose-bisphosphate aldolase 6	NA	1.89617	8.62088	0.024098
AT3G57880	Calcium-dependent lipid-binding (CaLB domain) plant phosphoribosyltransferase family protein	protein_coding	NA	NA	1.89577	5.65626	0.045631
AT3G59530	Calcium-dependent phosphotriesterase superfamily protein	protein_coding	LESS ADHERENT POLLEN 3	ATLAP3	1.87224	2.42833	0.030039
AT5G10550	global transcription factor group E2	protein_coding	global transcription factor group E2	NA	1.85988	6.78991	0.022043
AT1G10230	E3 ubiquitin ligase SCF complex subunit SKP1/ASK1 family protein	protein_coding	SKP1-like 18	ASK18,SKP1-like 18	1.84879	3.80442	0.048056
AT5G02430	Transducin/WD40 repeat-like superfamily protein	protein_coding	NA	NA	1.84572	3.59978	0.013094
AT5G59480	Haloacid dehalogenase-like hydrolase (HAD) superfamily protein	protein_coding	NA	NA	1.84172	5.97668	0.021537
AT1G58170	Disease resistance-responsive (dirigent-like protein) family protein	protein_coding	NA	NA	1.82383	1.30665	0.017323
AT2G32140	transmembrane receptor	protein_coding	NA	NA	1.78233	2.93296	0.046002
AT1G79550	phosphoglycerate kinase	protein_coding	phosphoglycerate kinase	NA	1.77561	9.03439	0.004699
AT2G36830	gamma tonoplast intrinsic protein	protein_coding	gamma tonoplast intrinsic protein	GAMMA-TIP1,GAMMA TONOPLAST INTRINSIC PROTEIN 1,TIP1%3B1,TONOPLAST INTRINSIC PROTEIN 1%3B1	1.77225	10.2102	0.010562
AT2G47470	thioredoxin family protein	protein_coding	UNFERTILIZED EMBRYO SAC 5	ATPDI11,ARABIDOPSIS THALIANA PROTEIN DISULFIDE ISOMERASE 11,ATPDIL2-1,PDI-LIKE 2-1,MEE30,MATERNAL EFFECT EMBRYO ARREST 30,PDI11,PROTEIN DISULFIDE ISOMERASE 11	1.77158	7.98076	0.025595
AT5G56000	HEAT SHOCK PROTEIN 81.4	protein_coding	HEAT SHOCK PROTEIN 81.4	AtHsp90.4,HEAT SHOCK PROTEIN 90.4	1.7678	6.10465	0.024098
AT1G29310	SecY protein transport family protein	protein_coding	NA	NA	1.74234	5.91732	0.037389
AT5G49910	chloroplast heat shock protein 70-2	protein_coding	chloroplast heat shock protein 70-2	HSC70-7,HEAT SHOCK PROTEIN 70-7	1.74155	9.59257	0.011291
AT4G30490	AFG1-like ATPase family protein	protein_coding	NA	NA	1.74012	5.78508	0.033988
AT5G16600	myb domain protein 43	protein_coding	myb domain protein 43	AtMYB43,myb domain protein 43	1.73955	1.72885	0.023146
AT5G56500	TCP-1/cpn60 chaperonin family protein	protein_coding	chaperonin-60beta3	NA	1.73047	4.66822	0.005773
AT2G00340	NA	novel_transcribed_region	NA	NA	1.72254	-0.07031	0.025791
AT2G37060	nuclear factor Y%2C subunit B8	protein_coding	nuclear factor Y%2C subunit B8	NA	1.7225	2.35814	0.010889
AT3G07770	HEAT SHOCK PROTEIN 89.1	protein_coding	HEAT SHOCK PROTEIN 89.1	AtHsp90-6,HEAT SHOCK PROTEIN 90-6,AtHsp90.6,HEAT SHOCK PROTEIN 90.6	1.72148	7.2574	0.007817
AT5G54940	Translation initiation factor SUI1 family protein	protein_coding	NA	NA	1.70719	8.96332	0.016914
AT2G17900	SET domain group 37	protein_coding	SET domain group 37	ASHR1,ASH1-related 1	1.70469	3.30601	0.044816
AT5G50460	secE/sec61-gamma protein transport protein	protein_coding	NA	NA	1.70189	6.37003	0.021967
AT4G04020	fibrillin	protein_coding	fibrillin	FIB1a,fibrillin 1a,PGL35,plastoglobulin 35	1.70053	10.3664	0.025165
AT5G03740	histone deacetylase 2C	protein_coding	histone deacetylase 2C	HDT3,HISTONE DEACETYLASE 3	1.68372	6.31085	0.004819
AT4G10040	cytochrome c-2	protein_coding	cytochrome c-2	NA	1.67939	5.50627	0.022613
AT3G54390	sequence-specific DNA binding transcription factor	protein_coding	NA	NA	1.65647	2.64766	0.031476
AT1G10380	Putative membrane lipoprotein	protein_coding	NA	NA	1.64084	3.43613	0.042747
AT1G27420	Galactose oxidase/kelch repeat superfamily protein	protein_coding	NA	NA	1.63546	1.73968	0.022043
AT1G07670	endomembrane-type CA-ATPase 4	protein_coding	endomembrane-type CA-ATPase 4	ATECA4	1.62964	6.64198	0.005688
AT4G27940	manganese tracking factor for mitochondrial SOD2	protein_coding	manganese tracking factor for mitochondrial SOD2	ATMTM1,ARABIDOPSIS MANGANESE TRACKING FACTOR FOR MITOCHONDRIAL SOD2	1.62143	3.72234	0.034971
AT5G04410	NAC domain containing protein 2	protein_coding	NAC domain containing protein 2	anac078,Arabidopsis NAC domain containing protein 78	1.61243	7.30978	0.02274
AT4G08230	glycine-rich protein	protein_coding	NA	NA	1.60734	5.80166	0.016587
AT3G11080	receptor like protein 35	protein_coding	receptor like protein 35	AtRLP35,receptor like protein 35	1.60048	2.2117	0.029831
AT1G55310	SC35-like splicing factor 33	protein_coding	SC35-LIKE SPLICING FACTOR 33	ATSCL33,SC35-like splicing factor 33,At-SCL33,SC35-LIKE SPLICING FACTOR 33,SR33,SC35-like splicing factor 33	1.60034	6.2385	0.016558
AT4G15410	serine/threonine protein phosphatase 2A 55 kDa regulatory subunit B prime gamma	protein_coding	serine/threonine protein phosphatase 2A 55 kDa regulatory subunit B prime gamma	NA	1.57544	4.83422	0.044624
AT5G13060	ARMADILLO BTB protein 1	protein_coding	ARMADILLO BTB protein 1	NA	1.56322	2.14321	0.023275
AT1G01940	Cyclophilin-like peptidyl-prolyl cis-trans isomerase family protein	protein_coding	NA	NA	1.56286	4.35547	0.043464
AT5G47120	BAX inhibitor 1	protein_coding	BAX inhibitor 1	ATBI-1,ARABIDOPSIS BAX INHIBITOR 1,ATBI1,BAX inhibitor 1,BI-1	1.54086	7.66385	0.031829
AT3G26450	Polyketide cyclase/dehydrase and lipid transport superfamily protein	protein_coding	NA	NA	1.53835	7.5038	0.010844
AT2G37630	myb-like HTH transcriptional regulator family protein	protein_coding	ASYMMETRIC LEAVES 1	ATMYB91,MYB DOMAIN PROTEIN 91,ATPHAN,ARABIDOPSIS PHANTASTICA-LIKE 1,MYB91,MYB DOMAIN PROTEIN 91	1.53105	5.05949	0.016558
AT5G56630	phosphofructokinase 7	protein_coding	phosphofructokinase 7	NA	1.51984	6.51953	0.017383
AT3G50920	Phosphatidic acid phosphatase (PAP2) family protein	protein_coding	lipid phosphate phosphatase epsilon 1	NA	1.51981	4.48275	0.044656
AT2G02350	SKP1 interacting partner 3	protein_coding	SKP1 interacting partner 3	AtPP2-B9,Phloem protein 2-B9	1.47179	1.15518	0.012218
AT4G01270	RING/U-box superfamily protein	protein_coding	NA	NA	1.46891	0.687015	0.032552
AT2G28000	chaperonin-60alpha	protein_coding	chaperonin-60alpha	CH-CPN60A,CHLOROPLAST CHAPERONIN 60ALPHA,Cpn60alpha1,chaperonin-60alpha1,SLP,SCHLEPPERLESS	1.46301	9.63063	0.010889
AT1G51340	MATE efflux family protein	protein_coding	NA	NA	1.45266	4.65997	0.009369
AT3G25013	Synaptobrevin family protein	protein_coding	NA	NA	1.44611	2.45209	0.030134
AT5G64400	CHCH domain protein	protein_coding	NA	NA	1.44538	8.40596	0.021537
AT3G52310	ABC transporter G family member 27	protein_coding	ATP-binding cassette G27	NA	1.44257	2.80605	0.026214
AT5G17830	Plasma-membrane choline transporter family protein	protein_coding	NA	NA	1.43798	-0.04801	0.038569
AT3G16910	acyl-activating enzyme 7	protein_coding	acyl-activating enzyme 7	ACN1,ACETATE NON-UTILIZING 1	1.43644	6.54509	0.010794
AT3G04120	glyceraldehyde-3-phosphate dehydrogenase C subunit 1	protein_coding	glyceraldehyde-3-phosphate dehydrogenase C subunit 1	GAPC-1,GAPC,GLYCERALDEHYDE-3-PHOSPHATE DEHYDROGENASE C SUBUNIT	1.42987	9.98312	0.021045
AT4G11220	VIRB2-interacting protein 2	protein_coding	VIRB2-interacting protein 2	RTNLB2,Reticulan like protein B2	1.42547	6.26114	0.03222
AT3G54820	plasma membrane intrinsic protein 2%3B5	protein_coding	plasma membrane intrinsic protein 2%3B5	PIP2D,PLASMA MEMBRANE INTRINSIC PROTEIN 2D	1.42102	4.05095	0.032388
AT2G03120	signal peptide peptidase	protein_coding	signal peptide peptidase	ATSPP,signal peptide peptidase	1.41892	6.53539	0.030197
AT1G60270	beta glucosidase 6	protein_coding	beta glucosidase 6	NA	1.40329	4.62093	0.0492
AT2G37170	plasma membrane intrinsic protein 2	protein_coding	plasma membrane intrinsic protein 2	PIP2%3B2,PLASMA MEMBRANE INTRINSIC PROTEIN 2%3B2	1.40126	7.36563	0.021045
AT1G12060	BCL-2-associated athanogene 5	protein_coding	BCL-2-associated athanogene 5	ATBAG5,BCL-2-associated athanogene 5	1.40116	2.37448	0.021978
AT5G58710	rotamase CYP 7	protein_coding	rotamase CYP 7	NA	1.39045	6.63854	0.030197
AT4G24972	tapetum determinant 1	protein_coding	TAPETUM DETERMINANT 1	NA	1.38757	5.54285	0.030794
AT5G20150	SPX domain-containing protein 1	protein_coding	SPXdomain gene 1	ATSPX1,ARABIDOPSIS THALIANA SPXDOMAIN GENE 1	1.37707	5.14467	0.035135
AT2G43375	other_RNA	other_rna	NA	NA	1.36739	1.55989	0.045815
AT1G66510	AAR2 protein family	protein_coding	NA	NA	1.35861	4.19472	0.040975
AT4G14270	polyadenylate-binding protein interacting protein	protein_coding	NA	NA	1.34633	6.24606	0.032388
AT3G08590	Phosphoglycerate mutase%2C 2%2C3-bisphosphoglycerate-independent	protein_coding	2%2C3-biphosphoglycerate-independent phosphoglycerate mutase 2	NA	1.34125	7.91821	0.010119
AT2G41410	Calcium-binding EF-hand family protein	protein_coding	NA	NA	1.3393	7.06759	0.032511
AT5G35080	ER lectin-like protein	protein_coding	OS9	AtOS9	1.32865	4.83827	0.027978
AT5G03560	Tetratricopeptide repeat (TPR)-like superfamily protein	protein_coding	NA	NA	1.32196	4.31473	0.008994
AT3G19100	Protein kinase superfamily protein	protein_coding	NA	NA	1.32024	5.15922	0.005688
AT1G75810	transmembrane protein	protein_coding	NA	NA	1.31537	3.17576	0.021064
AT1G53310	phosphoenolpyruvate carboxylase 1	protein_coding	phosphoenolpyruvate carboxylase 1	ATPEPC1,ATPPC1,phosphoenolpyruvate carboxylase 1,PEPC1,PEP(PHOSPHOENOLPYRUVATE) CARBOXYLASE 1	1.3127	7.90759	0.028911
AT1G18260	HCP-like superfamily protein	protein_coding	EMS-mutagenized bri1 suppressor 5	HRD3A	1.31114	6.24063	0.018583
AT1G29150	non-ATPase subunit 9	protein_coding	non-ATPase subunit 9	RPN6,REGULATORY PARTICLE NON-ATPASE 6	1.30969	7.67559	0.0124
AT1G65980	thioredoxin-dependent peroxidase 1	protein_coding	thioredoxin-dependent peroxidase 1	NA	1.30648	7.71165	0.008301
AT2G18510	RNA-binding (RRM/RBD/RNP motifs) family protein	protein_coding	embryo defective 2444	NA	1.30492	5.40367	0.017323
AT1G02090	Proteasome component (PCI) domain protein	protein_coding	FUSCA 5	ATCSN7,ARABIDOPSIS THALIANA COP9 SIGNALOSOME SUBUNIT 7,COP15,CONSTITUTIVE PHOTOMORPHOGENIC 15,CSN7,COP9 SIGNALOSOME SUBUNIT 7	1.30219	5.7017	0.032232
AT5G42220	Ubiquitin-like superfamily protein	protein_coding	NA	NA	1.29541	6.46286	0.005773
AT2G29400	type one protein phosphatase 1	protein_coding	type one protein phosphatase 1	PP1-AT,PROTEIN PHOSPHATASE 1	1.2848	6.18269	0.046849
AT1G79820	Major facilitator superfamily protein	protein_coding	SUPPRESSOR OF G PROTEIN BETA1	NA	1.28232	3.16181	0.027315
AT5G61510	GroES-like zinc-binding alcohol dehydrogenase family protein	protein_coding	NA	NA	1.27823	6.0268	0.042235
AT5G57100	Nucleotide/sugar transporter family protein	protein_coding	NA	NA	1.26655	3.70757	0.021967
AT1G78120	Tetratricopeptide repeat (TPR)-like superfamily protein	protein_coding	tetratricopeptide repeat 12	NA	1.26208	1.30892	0.042844
AT5G53760	Seven transmembrane MLO family protein	protein_coding	MILDEW RESISTANCE LOCUS O 11	ATMLO11,MILDEW RESISTANCE LOCUS O 11	1.2591	4.72129	0.042235
AT5G56600	profilin	protein_coding	profilin 3	PFN3,PROFILIN 3	1.25335	5.34713	0.005426
AT5G53830	VQ motif-containing protein	protein_coding	NA	MVQ3,MPK3/6-targeted VQP 3	1.24703	1.85666	0.027978
AT2G34250	SecY protein transport family protein	protein_coding	NA	NA	1.24406	8.62968	0.035946
AT4G14420	HR-like lesion-inducing protein-like protein	protein_coding	NA	NA	1.24238	5.92959	0.036021
AT3G27060	Ferritin/ribonucleotide reductase-like family protein	protein_coding	TSO MEANING 'UGLY' IN CHINESE 2	ATTSO2	1.23723	5.73557	0.017323
AT4G26780	Co-chaperone GrpE family protein	protein_coding	NA	NA	1.2261	4.94425	0.030197
AT2G33735	Chaperone DnaJ-domain superfamily protein	protein_coding	NA	NA	1.22448	2.4148	0.045174
AT1G64140	WRKY transcription factor	protein_coding	NA	NA	1.22094	7.16657	0.011091
AT1G05170	Galactosyltransferase family protein	protein_coding	NA	NA	1.21183	4.92921	0.01088
AT5G67160	HXXXD-type acyl-transferase family protein	protein_coding	ENHANCED PSEUDOMONAS SUSCEPTIBILTY 1	NA	1.20119	2.37215	0.039715
AT4G17420	Tryptophan RNA-binding attenuator protein-like protein	protein_coding	NA	NA	1.20101	4.31113	0.032388
AT1G78150	N-lysine methyltransferase	protein_coding	NA	NA	1.20035	6.05469	0.021064
AT3G08690	ubiquitin-conjugating enzyme 11	protein_coding	ubiquitin-conjugating enzyme 11	ATUBC11	1.1864	5.60092	0.010889
AT3G24495	MUTS homolog 7	protein_coding	MUTS homolog 7	ATMSH7,ARABIDOPSIS THALIANA MUTS HOMOLOG 7,MSH6-2,MUTS HOMOLOG 6-2	1.18584	2.83221	0.033593
AT1G75060	histone deacetylase complex subunit	protein_coding	NA	NA	1.18524	0.84215	0.042339
AT3G15140	Polynucleotidyl transferase%2C ribonuclease H-like superfamily protein	protein_coding	NA	NA	1.16594	2.23405	0.031829
AT1G26690	emp24/gp25L/p24 family/GOLD family protein	protein_coding	NA	NA	1.15847	4.74537	0.043464
AT2G21940	shikimate kinase 1	protein_coding	shikimate kinase 1	ATSK1	1.15843	4.76298	0.01206
AT4G24970	Histidine kinase-%2C DNA gyrase B-%2C and HSP90-like ATPase family protein	protein_coding	NA	NA	1.151	2.99427	0.047105
AT1G27360	squamosa promoter-like 11	protein_coding	squamosa promoter-like 11	NA	1.14693	3.86446	0.02876
AT3G46450	SEC14 cytosolic factor family protein / phosphoglyceride transfer family protein	protein_coding	NA	NA	1.14687	5.23512	0.027315
AT4G02980	endoplasmic reticulum auxin binding protein 1	protein_coding	endoplasmic reticulum auxin binding protein 1	ABP	1.14219	4.46462	0.009988
AT5G63500	transmembrane protein%2C putative (DUF 3339)	protein_coding	NA	NA	1.13732	2.97704	0.016558
AT4G22670	HSP70-interacting protein 1	protein_coding	HSP70-interacting protein 1	AtHip1,HSP70-interacting protein 1,TPR11,tetratricopeptide repeat 11	1.12524	7.42725	0.037803
AT4G29960	transmembrane protein	protein_coding	NA	NA	1.1251	4.83304	0.022043
AT1G53280	Class I glutamine amidotransferase-like superfamily protein	protein_coding	DJ-1 homolog B	AtDJ1B,DJ-1 homolog B,DJ-1b	1.12222	6.16694	0.035946
AT1G48370	YELLOW STRIPE like 8	protein_coding	YELLOW STRIPE like 8	NA	1.11821	4.36607	0.041516
AT3G03310	lecithin:cholesterol acyltransferase 3	protein_coding	lecithin:cholesterol acyltransferase 3	ATLCAT3,ARABIDOPSIS LECITHIN:CHOLESTEROL ACYLTRANSFERASE 3	1.11762	3.96826	0.0393
AT4G01810	Sec23/Sec24 protein transport family protein	protein_coding	NA	NA	1.1175	6.37622	0.025201
AT4G33440	Pectin lyase-like superfamily protein	protein_coding	NA	NA	1.11725	3.02987	0.026614
AT3G51990	Protein kinase superfamily protein	protein_coding	NA	NA	1.11722	3.21143	0.016558
AT1G60260	beta glucosidase 5	protein_coding	beta glucosidase 5	NA	1.11416	6.33281	0.00997
AT3G46870	Pentatricopeptide repeat (PPR) superfamily protein	protein_coding	NA	NA	1.10978	3.22378	0.018583
AT4G12130	Glycine cleavage T-protein family	protein_coding	NA	NA	1.10644	2.98652	0.009155
AT5G50240	protein-l-isoaspartate methyltransferase 2	protein_coding	protein-l-isoaspartate methyltransferase 2	AtPIMT2,Arabidopsis thaliana protein-l-isoaspartate methyltransferase 2	1.10363	3.29483	0.032388
AT5G24210	alpha/beta-Hydrolases superfamily protein	protein_coding	NA	NA	1.09734	6.41839	0.022105
AT2G43630	nucleusenvelope protein	protein_coding	NA	NA	1.09422	6.10167	0.006958
AT2G07690	Minichromosome maintenance (MCM2/3/5) family protein	protein_coding	MINICHROMOSOME MAINTENANCE 5	NA	1.08645	3.72202	0.00997
AT2G45920	U-box domain-containing protein	protein_coding	NA	NA	1.07624	3.62456	0.046849
AT1G62950	leucine-rich repeat transmembrane protein kinase family protein	protein_coding	NA	NA	1.0683	2.56942	0.028187
AT2G29125	ROTUNDIFOLIA like 2	protein_coding	ROTUNDIFOLIA like 2	DVL13,DEVIL 13	1.06668	0.695101	0.042666
AT5G08380	alpha-galactosidase 1	protein_coding	alpha-galactosidase 1	AtAGAL1,alpha-galactosidase 1	1.06583	5.48443	0.027978
AT1G17100	SOUL heme-binding family protein	protein_coding	haem-binding protein 1	AtHBP1	1.06152	6.48752	0.033034
AT1G56330	secretion-associated RAS 1B	protein_coding	secretion-associated RAS 1B	ATSAR1B,secretion-associated RAS 1B,ATSAR1,SECRETION-ASSOCIATED RAS 1,ATSARA1B,ARABIDOPSIS THALIANA SECRETION-ASSOCIATED RAS 1B,SAR1,SECRETION-ASSOCIATED RAS 1	1.0549	7.20917	0.043629
AT5G01890	Leucine-rich receptor-like protein kinase family protein	protein_coding	NA	PXC2,PXY/TDR-correlated 2	1.04274	3.99665	0.010914
AT1G30500	nuclear factor Y%2C subunit A7	protein_coding	nuclear factor Y%2C subunit A7	NA	1.04245	3.16396	0.045235
AT2G29570	proliferating cell nuclear antigen 2	protein_coding	proliferating cell nuclear antigen 2	ATPCNA2,A. THALIANA PROLIFERATING CELL NUCLEAR ANTIGEN 2	1.04171	3.70622	0.019376
AT3G14570	glucan synthase-like 4	protein_coding	glucan synthase-like 4	ATGSL04,glucan synthase-like 4,GSL4,glucan synthase-like 4,atgsl4,gsl04	1.04148	3.62841	0.027978
AT2G40830	RING-H2 finger C1A	protein_coding	RING-H2 finger C1A	NA	1.03488	5.67171	0.015044
AT3G09840	cell division cycle 48	protein_coding	cell division cycle 48	ATCDC48,CDC48A	1.03457	9.60059	0.049248
AT1G31120	K+ uptake permease 10	protein_coding	K+ uptake permease 10	NA	1.03199	4.35324	0.010844
AT1G78610	mechanosensitive channel of small conductance-like 6	protein_coding	mechanosensitive channel of small conductance-like 6	NA	1.02953	5.6614	0.04717
AT2G46735	death domain associated protein	protein_coding	NA	NA	1.02894	3.73837	0.022613
AT3G52930	Aldolase superfamily protein	protein_coding	fructose-bisphosphate aldolase 8	AtFBA8	1.02009	8.52642	0.016587
AT2G45960	plasma membrane intrinsic protein 1B	protein_coding	plasma membrane intrinsic protein 1B	ATHH2,PIP1%3B2,NAMED PLASMA MEMBRANE INTRINSIC PROTEIN 1%3B2,TMP-A,TRANSMEMBRANE PROTEIN A	1.01482	10.1266	0.036504
AT3G17712	hypothetical protein	protein_coding	NA	NA	1.01222	1.22755	0.033866
AT5G20720	chaperonin 20	protein_coding	chaperonin 20	ATCPN21,CHCPN10,CHLOROPLAST CHAPERONIN 10,CPN10,CHLOROPLAST CHAPERONIN 10,CPN21	1.01169	8.97283	0.01887
AT3G53760	GAMMA-TUBULIN COMPLEX PROTEIN 4	protein_coding	GAMMA-TUBULIN COMPLEX PROTEIN 4	ATGCP4	1.00694	2.80747	0.011901
AT5G51050	Mitochondrial substrate carrier family protein	protein_coding	ATP/phosphate carrier 2	NA	1.00641	4.55609	0.02019
AT5G04830	Nuclear transport factor 2 (NTF2) family protein	protein_coding	NA	NA	1.00447	6.28605	0.018583
AT5G02460	Dof-type zinc finger DNA-binding family protein	protein_coding	NA	NA	0.995973	1.91791	0.049089
AT2G31560	signal transducer/transcription protein%2C putative (DUF1685)	protein_coding	NA	NA	0.98532	5.41736	0.035435
AT1G56345	Pseudouridine synthase family protein	protein_coding	NA	NA	0.984757	2.54148	0.023409
AT4G35750	SEC14 cytosolic factor family protein / phosphoglyceride transfer family protein	protein_coding	NA	NA	0.978486	6.61068	0.049592
AT1G23180	ARM repeat superfamily protein	protein_coding	NA	NA	0.974017	6.07233	0.041456
AT5G18040	target of trans acting-siR480/255 protein	protein_coding	NA	HTT2,HEAT-INDUCED TAS1 TARGET 2	0.966741	3.82869	0.03524
AT3G57810	Cysteine proteinases superfamily protein	protein_coding	NA	NA	0.964621	4.65228	0.014069
AT5G37310	Endomembrane protein 70 protein family	protein_coding	NA	NA	0.96089	5.60378	0.032511
AT5G43330	Lactate/malate dehydrogenase family protein	protein_coding	cytosolic-NAD-dependent malate dehydrogenase 2	NA	0.959238	4.60101	0.035862
AT5G20320	dicer-like 4	protein_coding	dicer-like 4	ATDCL4,DICER-LIKE 4	0.957677	4.66675	0.022043
AT3G01210	RNA-binding (RRM/RBD/RNP motifs) family protein	protein_coding	NA	NA	0.948899	4.63779	0.025791
AT1G07370	proliferating cellular nuclear antigen 1	protein_coding	proliferating cellular nuclear antigen 1	ATPCNA1,PROLIFERATING CELLULAR NUCLEAR ANTIGEN 1	0.946148	3.25997	0.010914
AT5G44660	hypothetical protein	protein_coding	NA	NA	0.942513	4.41669	0.029972
AT1G12370	photolyase 1	protein_coding	photolyase 1	UVR2,UV RESISTANCE 2	0.923578	1.8055	0.025595
AT1G64440	NAD(P)-binding Rossmann-fold superfamily protein	protein_coding	ROOT HAIR DEFECTIVE 1	REB1,ROOT EPIDERMAL BULGER1,UGE4,UDP-GLUCOSE 4-EPIMERASE	0.920945	4.27849	0.017904
AT5G65900	DEA(D/H)-box RNA helicase family protein	protein_coding	NA	NA	0.913319	4.60485	0.030794
AT4G11680	Zinc finger%2C C3HC4 type (RING finger) family protein	protein_coding	NA	NA	0.912367	4.01518	0.023446
AT3G19830	Calcium-dependent lipid-binding (CaLB domain) family protein	protein_coding	NA	NA	0.906236	5.66593	0.01033
AT4G09750	NAD(P)-binding Rossmann-fold superfamily protein	protein_coding	NA	NA	0.90527	4.01112	0.034096
AT1G78920	vacuolar H+-pyrophosphatase 2	protein_coding	vacuolar H+-pyrophosphatase 2	AVP2,vacuolar H+-pyrophosphatase 2,AVPL1,VACUOLAR-PYROPHOSPHATASE LIKE PROTEIN 1,AtVHP2%3B1,VHP2%3B1	0.897519	6.99382	0.035435
AT5G48480	Lactoylglutathione lyase / glyoxalase I family protein	protein_coding	NA	NA	0.89391	3.69246	0.018201
AT4G01600	GRAM domain family protein	protein_coding	NA	NA	0.892954	2.91839	0.049128
AT4G14430	indole-3-butyric acid response 10	protein_coding	indole-3-butyric acid response 10	ATECI2,ARABIDOPSIS THALIANA DELTA(3), DELTA(2)-ENOYL COA ISOMERASE 2,ECHIB,ENOYL-COA HYDRATASE/ISOMERASE B,ECI2,DELTA(3), DELTA(2)-ENOYL COA ISOMERASE 2,PEC12	0.888369	5.66415	0.038945
AT5G59800	methyl-CPG-binding domain 7	protein_coding	methyl-CPG-binding domain 7	ATMBD7,ARABIDOPSIS THALIANA METHYL-CPG-BINDING DOMAIN 7	0.888082	2.95515	0.044516
AT5G17060	ADP-ribosylation factor B1B	protein_coding	ADP-ribosylation factor B1B	ATARFB1B,ADP-ribosylation factor B1B	0.87821	3.80168	0.046696
AT4G35560	Transducin/WD40 repeat-like superfamily protein	protein_coding	DUO1-activated WD40 1	NA	0.878054	3.86471	0.019433
AT4G33700	CBS domain protein (DUF21)	protein_coding	NA	NA	0.874698	6.00552	0.036001
AT2G26860	FBD%2C F-box and Leucine Rich Repeat domains containing protein	protein_coding	NA	NA	0.87219	3.29364	0.038581
AT4G10430	TMPIT-like protein	protein_coding	NA	NA	0.871981	5.13388	0.021537
AT2G41220	glutamate synthase 2	protein_coding	glutamate synthase 2	NA	0.871406	5.55105	0.042235
AT5G51740	Peptidase family M48 family protein	protein_coding	NA	NA	0.868532	3.99516	0.038945
AT1G44900	minichromosome maintenance (MCM2/3/5) family protein	protein_coding	MINICHROMOSOME MAINTENANCE 2	ATMCM2	0.866374	4.13796	0.032496
AT2G26260	3beta-hydroxysteroid-dehydrogenase/decarboxylase isoform 2	NA	NA	NA	0.866345	4.45893	0.02929
AT5G18830	squamosa promoter binding protein-like 7	protein_coding	squamosa promoter binding protein-like 7	ATSPL7,SQUAMOSA PROMOTER BINDING PROTEIN-LIKE 7	0.854366	4.56214	0.009824
AT5G64170	dentin sialophosphoprotein-like protein	protein_coding	NA	LNK1,night light-inducible and clock-regulated 1	0.845966	6.8845	0.041152
AT1G49660	carboxyesterase 5	protein_coding	carboxyesterase 5	AtCXE5,carboxyesterase 5	0.844685	4.36446	0.049592
AT5G46170	F-box family protein	protein_coding	NA	NA	0.841515	4.95688	0.017323
AT5G27430	Signal peptidase subunit	protein_coding	NA	NA	0.840075	4.68978	0.049089
AT1G04010	phospholipid sterol acyl transferase 1	protein_coding	phospholipid sterol acyl transferase 1	ATPSAT1,ERP1,enhanced response to Phytophthora 1	0.836699	3.78189	0.018583
AT4G33140	Haloacid dehalogenase-like hydrolase (HAD) superfamily protein	protein_coding	NA	NA	0.819911	3.7381	0.023331
AT1G15970	DNA glycosylase superfamily protein	protein_coding	NA	NA	0.815663	4.22423	0.010889
AT2G14880	SWIB/MDM2 domain superfamily protein	protein_coding	NA	NA	0.815591	5.84024	0.028475
AT3G25030	RING/U-box superfamily protein	protein_coding	NA	NA	0.815117	2.53778	0.034971
AT3G62200	Putative endonuclease or glycosyl hydrolase	protein_coding	NA	NA	0.812913	4.15578	0.027978
AT5G53420	CCT motif family protein	protein_coding	NA	NA	0.801056	6.00264	0.049128
AT5G58760	damaged DNA binding 2	protein_coding	damaged DNA binding 2	NA	0.799015	3.1615	0.034096
AT4G32730	Homeodomain-like protein	protein_coding	NA	NA	0.795557	4.64127	0.018565
AT5G49160	methyltransferase 1	protein_coding	methyltransferase 1	DDM2,DECREASED DNA METHYLATION 2,DMT01,DNA METHYLTRANSFERASE 01,DMT1,DNA METHYLTRANSFERASE 1,MET2,METHYLTRANSFERASE 2,METI,METHYLTRANSFERASE I	0.791336	4.42757	0.041756
AT2G03890	phosphoinositide 4-kinase gamma 7	protein_coding	phosphoinositide 4-kinase gamma 7	ATPI4K GAMMA 7,phosphoinositide 4-kinase gamma 7,UBDK GAMMA 7,UBIQUITIN-LIKE DOMAIN KINASE GAMMA 7	0.787247	6.34814	0.035435
AT1G32260	envelope glycoprotein	protein_coding	NA	NA	0.781608	3.60403	0.037389
AT1G19140	ubiquinone biosynthesis COQ9-like protein	protein_coding	NA	NA	0.777306	4.25496	0.049248
AT3G09455	dolichyl-diphosphooligosaccharide-protein glycosyltransferase subunit	protein_coding	NA	NA	0.773891	2.79114	0.026614
AT1G67490	glucosidase 1	protein_coding	glucosidase 1	KNF,KNOPF	0.773603	4.96875	0.046109
AT1G29260	peroxin 7	protein_coding	peroxin 7	ATPEX7,ARABIDOPSIS PEROXIN 7	0.77185	4.99287	0.039862
AT2G23180	cytochrome P450%2C family 96%2C subfamily A%2C polypeptide 1	protein_coding	cytochrome P450%2C family 96%2C subfamily A%2C polypeptide 1	NA	0.763586	2.89872	0.049998
AT5G09810	actin 7	protein_coding	actin 7	AtACT7	0.753827	9.33842	0.036001
AT1G03860	prohibitin 2	protein_coding	prohibitin 2	ATPHB2,prohibitin 2	0.750993	6.11607	0.036704
AT2G36810	ARM repeat superfamily protein	protein_coding	NA	SGR6,SHOOT GRAVITROPISM 6	0.748412	5.98249	0.033866
AT4G03120	C2H2 and C2HC zinc fingers superfamily protein	protein_coding	NA	NA	0.74796	3.73792	0.048056
AT2G45880	beta-amylase 7	protein_coding	beta-amylase 7	BMY4,BETA-AMYLASE 4	0.747441	3.92532	0.034971
AT3G51520	diacylglycerol acyltransferase family	protein_coding	diacylglycerol acyltransferase 2	AtDGAT2	0.745423	5.00671	0.021537
AT2G36300	Integral membrane Yip1 family protein	protein_coding	NA	NA	0.728629	4.43148	0.033022
AT2G33740	Nitrogen regulatory PII-like%2C alpha/beta	protein_coding	NA	NA	0.724947	4.71245	0.03222
AT3G59500	Integral membrane HRF1 family protein	protein_coding	NA	NA	0.722888	5.11997	0.021978
AT5G53150	DnaJ heat shock amino-terminal domain protein	protein_coding	NA	NA	0.722817	4.88368	0.049089
AT1G18330	Homeodomain-like superfamily protein	protein_coding	EARLY-PHYTOCHROME-RESPONSIVE1	RVE7,REVEILLE 7	0.717488	4.01263	0.042235
AT3G20010	SNF2 domain-containing protein / helicase domain-containing protein / zinc finger protein-like protein	protein_coding	NA	CHR27,chromatin remodeling 27,FRG1,SNF2-RING-HELICASE LIKE 1	0.712612	3.74972	0.026259
AT5G49950	alpha/beta-Hydrolases superfamily protein	protein_coding	NA	NA	0.699813	4.74039	0.016558
AT5G03200	RING/U-box superfamily protein	protein_coding	LOG2-LIKE UBIQUITIN LIGASE1	NA	0.697464	3.76451	0.037389
AT5G13960	histone-lysine N-methyltransferase%2C H3 lysine-9 specific SUVH4-like protein	protein_coding	SU(VAR)3-9 homolog 4	KYP,KRYPTONITE,SDG33,SET DOMAIN PROTEIN 33	0.695105	2.89941	0.037389
AT4G16141	GATA type zinc finger transcription factor family protein	protein_coding	NA	AtGATA17L,GATA17L,GATA17-LIKE	0.677639	4.00543	0.045235
AT2G31670	Stress responsive alpha-beta barrel domain protein	protein_coding	NA	UP3,UP3	0.677158	5.80106	0.048752
AT4G23910	hypothetical protein	protein_coding	NA	NA	0.675367	4.42159	0.025595
AT3G58640	Mitogen activated protein kinase kinase kinase-like protein	protein_coding	NA	NA	0.674397	6.16862	0.023038
AT2G05710	aconitase 3	protein_coding	aconitase 3	NA	0.670911	8.87604	0.039843
AT4G29130	hexokinase 1	protein_coding	hexokinase 1	ATHXK1,ARABIDOPSIS THALIANA HEXOKINASE 1,GIN2,GLUCOSE INSENSITIVE 2	0.664519	6.30655	0.045091
AT1G75980	Single hybrid motif superfamily protein	protein_coding	NA	NA	0.652991	3.20703	0.04717
AT5G41880	DNA primase POLA3	protein_coding	NA	NA	0.644727	2.85358	0.049248
AT3G22680	RNA-DIRECTED DNA METHYLATION 1	protein_coding	RNA-DIRECTED DNA METHYLATION 1	NA	0.641921	3.46358	0.049468
AT1G69770	chromomethylase 3	protein_coding	chromomethylase 3	NA	0.640972	3.53388	0.040222
AT5G51300	splicing factor-like protein	protein_coding	NA	AtSF1,Arabidopsis SF1 homolog	0.638146	5.67675	0.046849
AT5G26600	Pyridoxal phosphate (PLP)-dependent transferases superfamily protein	protein_coding	NA	NA	0.637171	4.9395	0.039522
AT5G10730	NAD(P)-binding Rossmann-fold superfamily protein	protein_coding	NA	NA	0.634612	4.33846	0.045174
AT5G67290	FAD-dependent oxidoreductase family protein	protein_coding	NA	NA	0.627885	5.00962	0.045174
AT3G18165	modifier of snc1%2C4	protein_coding	Modifier of snc1%2C4	NA	0.625437	5.1162	0.02929
AT2G25950	PITH domain protein (DUF1000)	protein_coding	NA	NA	0.619816	5.14036	0.034473
AT1G50380	Prolyl oligopeptidase family protein	protein_coding	NA	NA	0.61233	4.98363	0.034673
AT5G59830	DNA-binding protein	protein_coding	NA	NA	0.605888	3.90603	0.027521
AT4G06634	zinc finger (C2H2 type) family protein	protein_coding	Yin Yang 1	AtYY1	0.594901	3.93953	0.039843
AT3G62330	Zinc knuckle (CCHC-type) family protein	protein_coding	NA	NA	0.593882	4.76693	0.032168
AT1G06210	ENTH/VHS/GAT family protein	protein_coding	NA	NA	0.592073	5.1438	0.042692
AT1G67325	Ran BP2/NZF zinc finger-like superfamily protein	protein_coding	NA	NA	0.583325	4.70251	0.042235
AT1G01830	ARM repeat superfamily protein	protein_coding	NA	NA	0.57963	4.12458	0.032388
AT1G07980	nuclear factor Y%2C subunit C10	protein_coding	nuclear factor Y%2C subunit C10	NA	0.576402	3.62157	0.042235
AT4G24760	alpha/beta-Hydrolases superfamily protein	protein_coding	NA	NA	0.572657	3.55878	0.048496
AT5G42740	Sugar isomerase (SIS) family protein	protein_coding	NA	NA	0.570305	6.78081	0.038987
AT5G08680	ATP synthase alpha/beta family protein	protein_coding	NA	NA	0.566406	7.38562	0.04717
AT1G74510	Galactose oxidase/kelch repeat superfamily protein	protein_coding	NA	NA	0.54703	4.4158	0.037803
AT2G27730	copper ion binding protein	protein_coding	NA	NA	0.545437	6.18962	0.041848
AT4G29840	Pyridoxal-5'-phosphate-dependent enzyme family protein	protein_coding	METHIONINE OVER-ACCUMULATOR 2	TS,THREONINE SYNTHASE	0.545263	7.03167	0.038425
AT5G61840	Exostosin family protein	protein_coding	NA	NA	0.524511	4.82618	0.038945
AT1G74230	glycine-rich RNA-binding protein 5	protein_coding	glycine-rich RNA-binding protein 5	NA	0.520116	6.12432	0.046602
AT4G29680	Alkaline-phosphatase-like family protein	protein_coding	NA	NA	0.51724	4.896	0.049998
AT4G29940	pathogenesis related homeodomain protein A	protein_coding	pathogenesis related homeodomain proteinA	NA	0.495319	3.79536	0.046696
AT5G13050	5-formyltetrahydrofolate cycloligase	protein_coding	5-formyltetrahydrofolate cycloligase	NA	0.490691	4.37441	0.048496
AT1G70180	Sterile alpha motif (SAM) domain-containing protein	protein_coding	NA	NA	0.488046	4.48195	0.047419
AT3G63150	MIRO-related GTP-ase 2	protein_coding	MIRO-related GTP-ase 2	ATCBG,CALCIUM BINDING GTP-ASE	0.487084	5.62254	0.048886
AT5G12040	Nitrilase/cyanide hydratase and apolipoprotein N-acyltransferase family protein	protein_coding	NA	NA	0.485472	5.97718	0.037389
AT5G44250	peptidase%2C S9A/B/C family%2C catalytic domain protein (Protein of unknown function DUF829%2C transmembrane 53)	protein_coding	NA	NA	-0.4574	4.24516	0.04771
AT4G32660	Protein kinase superfamily protein	protein_coding	NA	NA	-0.4863	4.7214	0.037803
AT5G42420	Nucleotide-sugar transporter family protein	protein_coding	NA	URGT3,UDP-Rha/UDP-Gal transporter 3	-0.49915	4.93579	0.046483
AT3G29400	exocyst subunit exo70 family protein E1	protein_coding	exocyst subunit exo70 family protein E1	ATEXO70E1,exocyst subunit exo70 family protein E1	-0.50697	4.39736	0.048626
AT3G61600	POZ/BTB containin G-protein 1	protein_coding	POZ/BTB containin G-protein 1	ATPOB1,POZ/BTB containin G-protein 1,LRB2,light-response BTB 2	-0.51241	5.58449	0.036602
AT1G12850	Phosphoglycerate mutase family protein	protein_coding	NA	NA	-0.51492	5.15145	0.046002
AT2G25800	elongation factor Ts (DUF810)	protein_coding	NA	NA	-0.51609	5.37301	0.032168
AT4G30310	FGGY family of carbohydrate kinase	protein_coding	NA	NA	-0.51665	6.41913	0.045141
AT4G10840	Tetratricopeptide repeat (TPR)-like superfamily protein	protein_coding	kinesin light chain-related 1	NA	-0.5227	6.0935	0.037389
AT5G42520	basic pentacysteine 6	protein_coding	basic pentacysteine 6	ATBPC6,ARABIDOPSIS THALIANA BASIC PENTACYSTEINE 6,BBR/BPC6	-0.55395	4.71681	0.045843
AT4G28880	casein kinase I-like 3	protein_coding	casein kinase I-like 3	NA	-0.55653	5.33467	0.030197
AT2G35920	RNA helicase family protein	protein_coding	NA	NA	-0.58154	4.27998	0.035135
AT1G70060	SIN3-like 4	protein_coding	SIN3-like 4	NA	-0.58222	5.21723	0.032552
AT5G06700	trichome birefringence-like protein (DUF828)	protein_coding	NA	TBR,TBR,TRICHOME BIREFRINGENCE	-0.59893	6.39172	0.045235
AT3G62650	hypothetical protein	protein_coding	NA	NA	-0.59959	4.4612	0.042329
AT3G50340	hypothetical protein	protein_coding	NA	NA	-0.60025	3.50338	0.041848
AT5G26240	chloride channel D	protein_coding	chloride channel D	ATCLC-D,AtCLCd,CLCd,chloride channel D	-0.60334	5.17991	0.026614
AT4G00180	Plant-specific transcription factor YABBY family protein	protein_coding	YABBY3	NA	-0.6065	4.49104	0.042853
AT5G05870	UDP-glucosyl transferase 76C1	protein_coding	UDP-glucosyl transferase 76C1	NA	-0.60658	3.3384	0.046266
AT5G06970	plant/protein (DUF810)	protein_coding	NA	NA	-0.60663	5.52026	0.03794
AT4G13630	zein-binding protein (Protein of unknown function%2C DUF593)	protein_coding	NA	NA	-0.61037	3.87566	0.030609
AT2G41540	6-phosphogluconate dehydrogenase family protein	protein_coding	NA	NA	-0.61641	3.60367	0.045319
AT1G05320	myosin heavy chain%2C embryonic smooth protein	protein_coding	NA	NA	-0.62532	4.24631	0.032232
AT2G40630	Uncharacterized conserved protein (UCP030365)	protein_coding	NA	NA	-0.62726	3.25596	0.035042
AT4G31920	response regulator 10	protein_coding	response regulator 10	ARR10,response regulator 10	-0.63027	4.08545	0.02929
AT5G50380	exocyst subunit exo70 family protein F1	protein_coding	exocyst subunit exo70 family protein F1	ATEXO70F1,exocyst subunit exo70 family protein F1	-0.63557	4.86479	0.038945
AT3G57790	Pectin lyase-like superfamily protein	protein_coding	NA	NA	-0.64011	3.4573	0.048678
AT1G22910	RNA-binding (RRM/RBD/RNP motifs) family protein	protein_coding	NA	NA	-0.6411	3.92431	0.042853
AT3G46820	type one serine/threonine protein phosphatase 5	protein_coding	type one serine/threonine protein phosphatase 5	NA	-0.65351	3.99124	0.021537
AT3G15095	Serine/Threonine-kinase pakA-like protein	protein_coding	high chlorophyll fluorescence 243	NA	-0.65954	5.57825	0.042329
AT4G29260	HAD superfamily%2C subfamily IIIB acid phosphatase	protein_coding	NA	NA	-0.66083	4.28287	0.032552
AT2G17820	histidine kinase 1	protein_coding	histidine kinase 1	AHK1,ATHK1,histidine kinase 1	-0.66202	5.78868	0.032552
AT3G49260	IQ-domain 21	protein_coding	IQ-domain 21	NA	-0.66613	5.69277	0.044816
AT2G16280	3-ketoacyl-CoA synthase 9	protein_coding	3-ketoacyl-CoA synthase 9	NA	-0.67726	6.02771	0.029309
AT3G11780	MD-2-related lipid recognition domain-containing protein / ML domain-containing protein	protein_coding	NA	NA	-0.69164	5.35272	0.042339
AT1G72630	ELF4-like 2	protein_coding	ELF4-like 2	NA	-0.69518	3.66133	0.040043
AT1G34418	other_RNA	other_rna	NA	NA	-0.70622	4.15683	0.044516
AT5G07890	myosin heavy chain-like protein	protein_coding	NA	NA	-0.70837	3.32156	0.046849
AT5G26910	GPI-anchored adhesin-like protein	protein_coding	TON1 Recruiting Motif 8	NA	-0.71372	4.26094	0.03674
AT4G30760	Putative endonuclease or glycosyl hydrolase	protein_coding	NA	NA	-0.71454	4.88298	0.025004
AT2G22400	S-adenosyl-L-methionine-dependent methyltransferases superfamily protein	protein_coding	NA	NA	-0.71802	5.74904	0.021537
AT1G64180	intracellular protein transport protein USO1-like protein	protein_coding	NA	NA	-0.72003	2.69611	0.048604
AT5G43880	methyl-coenzyme M reductase II subunit gamma%2C putative (DUF3741)	protein_coding	TON1 Recruiting Motif 21	NA	-0.72104	5.22717	0.041848
AT2G37840	Protein kinase superfamily protein	protein_coding	NA	NA	-0.72538	4.33274	0.022985
AT3G24120	Homeodomain-like superfamily protein	protein_coding	NA	NA	-0.72685	4.02583	0.027761
AT5G50900	ARM repeat superfamily protein	protein_coding	NA	NA	-0.72791	3.93745	0.034096
AT1G21730	P-loop containing nucleoside triphosphate hydrolases superfamily protein	protein_coding	NA	NA	-0.72819	4.0146	0.046002
AT4G16950	Disease resistance protein (TIR-NBS-LRR class) family	protein_coding	RECOGNITION OF PERONOSPORA PARASITICA 5	NA	-0.74241	6.95432	0.02284
AT2G03340	WRKY DNA-binding protein 3	protein_coding	WRKY DNA-binding protein 3	NA	-0.74291	5.12057	0.016587
AT4G37670	N-acetyl-l-glutamate synthase 2	protein_coding	N-acetyl-l-glutamate synthase 2	NA	-0.74342	3.19807	0.046849
AT1G03930	dual specificity kinase 1	protein_coding	dual specificity kinase 1	CKL9ALPHA,CASEIN KINASE I-LIKE 9 ALPHA,CKL9BETA,CASEIN KINASE I-LIKE 9 BETA	-0.74392	5.61982	0.026899
AT1G51500	ABC-2 type transporter family protein	protein_coding	ATP-binding cassette G12	ATWBC12,ARABIDOPSIS THALIANA WHITE-BROWN COMPLEX 12,AtABCG12,CER5,ECERIFERUM 5,D3,WBC12,WHITE-BROWN COMPLEX 12	-0.7453	6.71294	0.045174
AT5G44930	Exostosin family protein	protein_coding	ARABINAN DEFICIENT 2	NA	-0.74921	3.14661	0.03222
AT5G03520	RAB GTPase homolog 8C	protein_coding	RAB GTPase homolog 8C	ATRAB-E1D,ARABIDOPSIS RAB HOMOLOG E1D,ATRAB8C,RAB GTPase homolog 8C,ATRABE1D,RAB-E1D,RAB HOMOLOG E1D	-0.75229	5.3599	0.021978
AT5G60210	ROP interactive partner 5	protein_coding	ROP interactive partner 5	NA	-0.75425	3.51917	0.033837
AT3G57800	basic helix-loop-helix (bHLH) DNA-binding superfamily protein	protein_coding	NA	NA	-0.75505	4.94062	0.021537
[truncated: 393 more rows]

## Sheet: Supplementary Dataset 6
Supplementary Dataset 6 Dampened transcripts
[truncated: 2,188 more rows]

[truncated: 2 more sheets: Supplementary Dataset 7, Supplementary Dataset 8]
